# Supplementary material for: Cost-Effective Mapping of Genetic Interactions in Mammalian Cells
Source: Front Genet. 2021 Aug 5;12:703738. doi: 10.3389/fgene.2021.703738 (PMC8381747; doi:10.3389/fgene.2021.703738)
Supplement: Supplementary file 2 [file Table_1.xlsx]

## Sheet: RH_Ix_seq_cliques
col	row	x_Chromosome	y_Chromosome	x_ChrPos	y_ChrPos	x_gcoord	y_gcoord	x_gene_id	y_gene_id	pair	pair_rev	x_geneSymbol	y_geneSymbol	x_gene_Chr_pos	y_gene_Chr_pos	x_dist	y_dist	log10P	OR	clones_olap	clique
2744	1536	chr1	chr1	27930000	15850000	27930000	15850000	ENSG00000130768	ENSG00000233954	ENSG00000130768_ENSG00000233954	ENSG00000233954_ENSG00000130768	SMPDL3B	UQCRHL	27947078	15808258	-17078	41742	3.47756	Inf	5	4
4506	2962	chr1	chr1	45550000	30110000	45550000	30110000	ENSG00000117448	ENSG00000162510	ENSG00000117448_ENSG00000162510	ENSG00000162510_ENSG00000117448	AKR1A1	MATN1	45560296	30717431	-10296	-607431	3.13513	Inf	4	2
5484	2962	chr1	chr1	55330000	30110000	55330000	30110000	ENSG00000162402	ENSG00000162510	ENSG00000162402_ENSG00000162510	ENSG00000162510_ENSG00000162402	USP24	MATN1	55140862	30717431	189138	-607431	3.13513	Inf	4	2
5484	4506	chr1	chr1	55330000	45550000	55330000	45550000	ENSG00000162402	ENSG00000117448	ENSG00000162402_ENSG00000117448	ENSG00000117448_ENSG00000162402	USP24	AKR1A1	55140862	45560296	189138	-10296	3.13513	Inf	4	2
6123	1536	chr1	chr1	61720000	15850000	61720000	15850000	ENSG00000162604	ENSG00000233954	ENSG00000162604_ENSG00000233954	ENSG00000233954_ENSG00000162604	TM2D1	UQCRHL	61703234	15808258	16766	41742	3.47756	Inf	5	4
6123	2744	chr1	chr1	61720000	27930000	61720000	27930000	ENSG00000162604	ENSG00000130768	ENSG00000162604_ENSG00000130768	ENSG00000130768_ENSG00000162604	TM2D1	SMPDL3B	61703234	27947078	16766	-17078	3.47756	Inf	5	4
15328	2962	chr1	chr1	153770000	30110000	153770000	30110000	ENSG00000143554	ENSG00000162510	ENSG00000143554_ENSG00000162510	ENSG00000162510_ENSG00000143554	SLC27A3	MATN1	153777256	30717431	-7256	-607431	3.13513	Inf	4	2
15328	4506	chr1	chr1	153770000	45550000	153770000	45550000	ENSG00000143554	ENSG00000117448	ENSG00000143554_ENSG00000117448	ENSG00000117448_ENSG00000143554	SLC27A3	AKR1A1	153777256	45560296	-7256	-10296	3.13513	Inf	4	2
15328	5484	chr1	chr1	153770000	55330000	153770000	55330000	ENSG00000143554	ENSG00000162402	ENSG00000143554_ENSG00000162402	ENSG00000162402_ENSG00000143554	SLC27A3	USP24	153777256	55140862	-7256	189138	3.13513	Inf	4	2
16334	4647	chr1	chr1	163830000	46960000	163830000	46960000	ENSG00000143228	ENSG00000187048	ENSG00000143228_ENSG00000187048	ENSG00000187048_ENSG00000143228	NUF2	CYP4A11	163311170	46935330	518830	24670	2.65801	Inf	3	1
16721	4647	chr1	chr1	167700000	46960000	167700000	46960000	ENSG00000198771	ENSG00000187048	ENSG00000198771_ENSG00000187048	ENSG00000187048_ENSG00000198771	RCSD1	CYP4A11	167669394	46935330	30606	24670	2.65801	Inf	3	1
16721	16334	chr1	chr1	167700000	163830000	167700000	163830000	ENSG00000198771	ENSG00000143228	ENSG00000198771_ENSG00000143228	ENSG00000143228_ENSG00000198771	RCSD1	NUF2	167669394	163311170	30606	518830	2.65801	Inf	3	1
17056	4647	chr1	chr1	171050000	46960000	171050000	46960000	ENSG00000117501	ENSG00000187048	ENSG00000117501_ENSG00000187048	ENSG00000187048_ENSG00000117501	MROH9	CYP4A11	171000118	46935330	49882	24670	2.65801	Inf	3	1
17056	16334	chr1	chr1	171050000	163830000	171050000	163830000	ENSG00000117501	ENSG00000143228	ENSG00000117501_ENSG00000143228	ENSG00000143228_ENSG00000117501	MROH9	NUF2	171000118	163311170	49882	518830	2.65801	Inf	3	1
17056	16721	chr1	chr1	171050000	167700000	171050000	167700000	ENSG00000117501	ENSG00000198771	ENSG00000117501_ENSG00000198771	ENSG00000198771_ENSG00000117501	MROH9	RCSD1	171000118	167669394	49882	30606	2.65801	Inf	3	1
17058	4647	chr1	chr1	171070000	46960000	171070000	46960000	ENSG00000007933	ENSG00000187048	ENSG00000007933_ENSG00000187048	ENSG00000187048_ENSG00000007933	FMO3	CYP4A11	171104360	46935330	-34360	24670	2.65801	Inf	3	1
17058	16334	chr1	chr1	171070000	163830000	171070000	163830000	ENSG00000007933	ENSG00000143228	ENSG00000007933_ENSG00000143228	ENSG00000143228_ENSG00000007933	FMO3	NUF2	171104360	163311170	-34360	518830	2.65801	Inf	3	1
17058	16721	chr1	chr1	171070000	167700000	171070000	167700000	ENSG00000007933	ENSG00000198771	ENSG00000007933_ENSG00000198771	ENSG00000198771_ENSG00000007933	FMO3	RCSD1	171104360	167669394	-34360	30606	2.65801	Inf	3	1
19576	15425	chr1	chr1	196250000	154740000	196250000	154740000	ENSG00000162687	ENSG00000143603	ENSG00000162687_ENSG00000143603	ENSG00000143603_ENSG00000162687	KCNT2	KCNN3	196417502	154783868	-167502	-43868	3.13513	Inf	4	0
21260	5475	chr1	chr1	213090000	55240000	213090000	55240000	ENSG00000136643	ENSG00000162402	ENSG00000136643_ENSG00000162402	ENSG00000162402_ENSG00000136643	RPS6KC1	USP24	213163004	55140862	-73004	99138	3.47756	Inf	5	0
21854	4647	chr1	chr1	219030000	46960000	219030000	46960000	ENSG00000143353	ENSG00000187048	ENSG00000143353_ENSG00000187048	ENSG00000187048_ENSG00000143353	LYPLAL1	CYP4A11	219193367	46935330	-163367	24670	2.65801	Inf	3	1
21854	16334	chr1	chr1	219030000	163830000	219030000	163830000	ENSG00000143353	ENSG00000143228	ENSG00000143353_ENSG00000143228	ENSG00000143228_ENSG00000143353	LYPLAL1	NUF2	219193367	163311170	-163367	518830	2.65801	Inf	3	1
21854	16721	chr1	chr1	219030000	167700000	219030000	167700000	ENSG00000143353	ENSG00000198771	ENSG00000143353_ENSG00000198771	ENSG00000198771_ENSG00000143353	LYPLAL1	RCSD1	219193367	167669394	-163367	30606	2.65801	Inf	3	1
21854	17056	chr1	chr1	219030000	171050000	219030000	171050000	ENSG00000143353	ENSG00000117501	ENSG00000143353_ENSG00000117501	ENSG00000117501_ENSG00000143353	LYPLAL1	MROH9	219193367	171000118	-163367	49882	2.65801	Inf	3	1
21854	17058	chr1	chr1	219030000	171070000	219030000	171070000	ENSG00000143353	ENSG00000007933	ENSG00000143353_ENSG00000007933	ENSG00000007933_ENSG00000143353	LYPLAL1	FMO3	219193367	171104360	-163367	-34360	2.65801	Inf	3	1
24877	15425	chr2	chr1	1300000	154740000	249750000	154740000	ENSG00000172554	ENSG00000143603	ENSG00000172554_ENSG00000143603	ENSG00000143603_ENSG00000172554	SNTG2	KCNN3	1159231	154783868	140769	-43868	3.13513	Inf	4	0
24877	19576	chr2	chr1	1300000	196250000	249750000	196250000	ENSG00000172554	ENSG00000162687	ENSG00000172554_ENSG00000162687	ENSG00000162687_ENSG00000172554	SNTG2	KCNT2	1159231	196417502	140769	-167502	3.13513	Inf	4	0
25228	4647	chr2	chr1	4810000	46960000	253260000	46960000	ENSG00000176887	ENSG00000187048	ENSG00000176887_ENSG00000187048	ENSG00000187048_ENSG00000176887	SOX11	CYP4A11	5696884	46935330	-886884	24670	2.65801	Inf	3	1
25228	16334	chr2	chr1	4810000	163830000	253260000	163830000	ENSG00000176887	ENSG00000143228	ENSG00000176887_ENSG00000143228	ENSG00000143228_ENSG00000176887	SOX11	NUF2	5696884	163311170	-886884	518830	2.65801	Inf	3	1
25228	16721	chr2	chr1	4810000	167700000	253260000	167700000	ENSG00000176887	ENSG00000198771	ENSG00000176887_ENSG00000198771	ENSG00000198771_ENSG00000176887	SOX11	RCSD1	5696884	167669394	-886884	30606	2.65801	Inf	3	1
25228	17056	chr2	chr1	4810000	171050000	253260000	171050000	ENSG00000176887	ENSG00000117501	ENSG00000176887_ENSG00000117501	ENSG00000117501_ENSG00000176887	SOX11	MROH9	5696884	171000118	-886884	49882	2.65801	Inf	3	1
25228	17058	chr2	chr1	4810000	171070000	253260000	171070000	ENSG00000176887	ENSG00000007933	ENSG00000176887_ENSG00000007933	ENSG00000007933_ENSG00000176887	SOX11	FMO3	5696884	171104360	-886884	-34360	2.65801	Inf	3	1
25228	21854	chr2	chr1	4810000	219030000	253260000	219030000	ENSG00000176887	ENSG00000143353	ENSG00000176887_ENSG00000143353	ENSG00000143353_ENSG00000176887	SOX11	LYPLAL1	5696884	219193367	-886884	-163367	2.65801	Inf	3	1
29341	15425	chr2	chr1	45940000	154740000	294390000	154740000	ENSG00000171132	ENSG00000143603	ENSG00000171132_ENSG00000143603	ENSG00000143603_ENSG00000171132	PRKCE	KCNN3	45919668	154783868	20332	-43868	3.13513	Inf	4	0
29341	19576	chr2	chr1	45940000	196250000	294390000	196250000	ENSG00000171132	ENSG00000162687	ENSG00000171132_ENSG00000162687	ENSG00000162687_ENSG00000171132	PRKCE	KCNT2	45919668	196417502	20332	-167502	3.13513	Inf	4	0
29341	24877	chr2	chr2	45940000	1300000	294390000	249750000	ENSG00000171132	ENSG00000172554	ENSG00000171132_ENSG00000172554	ENSG00000172554_ENSG00000171132	PRKCE	SNTG2	45919668	1159231	20332	140769	3.13513	Inf	4	0
30442	28201	chr2	chr2	56950000	34540000	305400000	282990000	ENSG00000055813	ENSG00000119812	ENSG00000055813_ENSG00000119812	ENSG00000119812_ENSG00000055813	CCDC85A	FAM98A	56285081	33591521	664919	948479	2.02119	Inf	2	5
31454	8941	chr2	chr1	67070000	89900000	315520000	89900000	ENSG00000143971	ENSG00000171492	ENSG00000143971_ENSG00000171492	ENSG00000171492_ENSG00000143971	ETAA1	LRRC8D	67404704	89878812	-334704	21188	3.6994	Inf	6	0
31454	9040	chr2	chr1	67070000	90890000	315520000	90890000	ENSG00000143971	ENSG00000122482	ENSG00000143971_ENSG00000122482	ENSG00000122482_ENSG00000143971	ETAA1	ZNF644	67404704	90968785	-334704	-78785	3.6994	Inf	6	0
34736	2962	chr2	chr1	99890000	30110000	348340000	30110000	ENSG00000144218	ENSG00000162510	ENSG00000144218_ENSG00000162510	ENSG00000162510_ENSG00000144218	AFF3	MATN1	99844079	30717431	45921	-607431	3.13513	Inf	4	2
34736	4506	chr2	chr1	99890000	45550000	348340000	45550000	ENSG00000144218	ENSG00000117448	ENSG00000144218_ENSG00000117448	ENSG00000117448_ENSG00000144218	AFF3	AKR1A1	99844079	45560296	45921	-10296	3.13513	Inf	4	2
34736	5484	chr2	chr1	99890000	55330000	348340000	55330000	ENSG00000144218	ENSG00000162402	ENSG00000144218_ENSG00000162402	ENSG00000162402_ENSG00000144218	AFF3	USP24	99844079	55140862	45921	189138	3.13513	Inf	4	2
34736	15328	chr2	chr1	99890000	153770000	348340000	153770000	ENSG00000144218	ENSG00000143554	ENSG00000144218_ENSG00000143554	ENSG00000143554_ENSG00000144218	AFF3	SLC27A3	99844079	153777256	45921	-7256	3.13513	Inf	4	2
34805	1536	chr2	chr1	100580000	15850000	349030000	15850000	ENSG00000115539	ENSG00000233954	ENSG00000115539_ENSG00000233954	ENSG00000233954_ENSG00000115539	PDCL3	UQCRHL	100569866	15808258	10134	41742	3.47756	Inf	5	4
34805	2744	chr2	chr1	100580000	27930000	349030000	27930000	ENSG00000115539	ENSG00000130768	ENSG00000115539_ENSG00000130768	ENSG00000130768_ENSG00000115539	PDCL3	SMPDL3B	100569866	27947078	10134	-17078	3.47756	Inf	5	4
34805	6123	chr2	chr1	100580000	61720000	349030000	61720000	ENSG00000115539	ENSG00000162604	ENSG00000115539_ENSG00000162604	ENSG00000162604_ENSG00000115539	PDCL3	TM2D1	100569866	61703234	10134	16766	3.47756	Inf	5	4
35141	2962	chr2	chr1	103940000	30110000	352390000	30110000	ENSG00000198914	ENSG00000162510	ENSG00000198914_ENSG00000162510	ENSG00000162510_ENSG00000198914	POU3F3	MATN1	104857042	30717431	-917042	-607431	3.13513	Inf	4	2
35141	4506	chr2	chr1	103940000	45550000	352390000	45550000	ENSG00000198914	ENSG00000117448	ENSG00000198914_ENSG00000117448	ENSG00000117448_ENSG00000198914	POU3F3	AKR1A1	104857042	45560296	-917042	-10296	3.13513	Inf	4	2
35141	5484	chr2	chr1	103940000	55330000	352390000	55330000	ENSG00000198914	ENSG00000162402	ENSG00000198914_ENSG00000162402	ENSG00000162402_ENSG00000198914	POU3F3	USP24	104857042	55140862	-917042	189138	3.13513	Inf	4	2
35141	15328	chr2	chr1	103940000	153770000	352390000	153770000	ENSG00000198914	ENSG00000143554	ENSG00000198914_ENSG00000143554	ENSG00000143554_ENSG00000198914	POU3F3	SLC27A3	104857042	153777256	-917042	-7256	3.13513	Inf	4	2
35141	34736	chr2	chr2	103940000	99890000	352390000	348340000	ENSG00000198914	ENSG00000144218	ENSG00000198914_ENSG00000144218	ENSG00000144218_ENSG00000198914	POU3F3	AFF3	104857042	99844079	-917042	45921	3.13513	Inf	4	2
38953	9813	chr2	chr1	142060000	98620000	390510000	98620000	ENSG00000168702	ENSG00000162627	ENSG00000168702_ENSG00000162627	ENSG00000162627_ENSG00000168702	LRP1B	SNX7	141181562	98711100	878438	-91100	3.13513	Inf	4	3
39264	2962	chr2	chr1	145170000	30110000	393620000	30110000	ENSG00000169554	ENSG00000162510	ENSG00000169554_ENSG00000162510	ENSG00000162510_ENSG00000169554	ZEB2	MATN1	144442710	30717431	727290	-607431	3.13513	Inf	4	2
39264	4506	chr2	chr1	145170000	45550000	393620000	45550000	ENSG00000169554	ENSG00000117448	ENSG00000169554_ENSG00000117448	ENSG00000117448_ENSG00000169554	ZEB2	AKR1A1	144442710	45560296	727290	-10296	3.13513	Inf	4	2
39264	5484	chr2	chr1	145170000	55330000	393620000	55330000	ENSG00000169554	ENSG00000162402	ENSG00000169554_ENSG00000162402	ENSG00000162402_ENSG00000169554	ZEB2	USP24	144442710	55140862	727290	189138	3.13513	Inf	4	2
39264	15328	chr2	chr1	145170000	153770000	393620000	153770000	ENSG00000169554	ENSG00000143554	ENSG00000169554_ENSG00000143554	ENSG00000143554_ENSG00000169554	ZEB2	SLC27A3	144442710	153777256	727290	-7256	3.13513	Inf	4	2
39264	34736	chr2	chr2	145170000	99890000	393620000	348340000	ENSG00000169554	ENSG00000144218	ENSG00000169554_ENSG00000144218	ENSG00000144218_ENSG00000169554	ZEB2	AFF3	144442710	99844079	727290	45921	3.13513	Inf	4	2
39264	35141	chr2	chr2	145170000	103940000	393620000	352390000	ENSG00000169554	ENSG00000198914	ENSG00000169554_ENSG00000198914	ENSG00000198914_ENSG00000169554	ZEB2	POU3F3	144442710	104857042	727290	-917042	3.13513	Inf	4	2
40208	8662	chr2	chr1	154610000	87110000	403060000	87110000	ENSG00000162989	ENSG00000267561	ENSG00000162989_ENSG00000267561	ENSG00000267561_ENSG00000162989	KCNJ3	AC093155.3	154778104	87081106	-168104	28894	3.6994	Inf	6	0
45509	35246	chr2	chr2	207620000	104990000	456070000	353440000	ENSG00000144401	ENSG00000135972	ENSG00000144401_ENSG00000135972	ENSG00000135972_ENSG00000144401	METTL21A	MRPS9	207603280	105069014	16720	-79014	3.13513	Inf	4	0
47652	35246	chr2	chr2	229050000	104990000	477500000	353440000	ENSG00000153823	ENSG00000135972	ENSG00000153823_ENSG00000135972	ENSG00000135972_ENSG00000153823	PID1	MRPS9	229060906	105069014	-10906	-79014	3.13513	Inf	4	0
47652	45509	chr2	chr2	229050000	207620000	477500000	456070000	ENSG00000153823	ENSG00000144401	ENSG00000153823_ENSG00000144401	ENSG00000144401_ENSG00000153823	PID1	METTL21A	229060906	207603280	-10906	16720	3.13513	Inf	4	0
48694	28201	chr2	chr2	239470000	34540000	487920000	282990000	ENSG00000068024	ENSG00000119812	ENSG00000068024_ENSG00000119812	ENSG00000119812_ENSG00000068024	HDAC4	FAM98A	239224911	33591521	245089	948479	2.02119	Inf	2	5
48694	30442	chr2	chr2	239470000	56950000	487920000	305400000	ENSG00000068024	ENSG00000055813	ENSG00000068024_ENSG00000055813	ENSG00000055813_ENSG00000068024	HDAC4	CCDC85A	239224911	56285081	245089	664919	2.02119	Inf	2	5
48711	28201	chr2	chr2	239640000	34540000	488090000	282990000	ENSG00000130414	ENSG00000119812	ENSG00000130414_ENSG00000119812	ENSG00000119812_ENSG00000130414	NDUFA10	FAM98A	239958898	33591521	-318898	948479	2.02119	Inf	2	5
48711	30442	chr2	chr2	239640000	56950000	488090000	305400000	ENSG00000130414	ENSG00000055813	ENSG00000130414_ENSG00000055813	ENSG00000055813_ENSG00000130414	NDUFA10	CCDC85A	239958898	56285081	-318898	664919	2.02119	Inf	2	5
50034	4647	chr3	chr1	11670000	46960000	501810000	46960000	ENSG00000144560	ENSG00000187048	ENSG00000144560_ENSG00000187048	ENSG00000187048_ENSG00000144560	VGLL4	CYP4A11	11663710	46935330	6290	24670	2.65801	Inf	3	1
50034	16334	chr3	chr1	11670000	163830000	501810000	163830000	ENSG00000144560	ENSG00000143228	ENSG00000144560_ENSG00000143228	ENSG00000143228_ENSG00000144560	VGLL4	NUF2	11663710	163311170	6290	518830	2.65801	Inf	3	1
50034	16721	chr3	chr1	11670000	167700000	501810000	167700000	ENSG00000144560	ENSG00000198771	ENSG00000144560_ENSG00000198771	ENSG00000198771_ENSG00000144560	VGLL4	RCSD1	11663710	167669394	6290	30606	2.65801	Inf	3	1
50034	17056	chr3	chr1	11670000	171050000	501810000	171050000	ENSG00000144560	ENSG00000117501	ENSG00000144560_ENSG00000117501	ENSG00000117501_ENSG00000144560	VGLL4	MROH9	11663710	171000118	6290	49882	2.65801	Inf	3	1
50034	17058	chr3	chr1	11670000	171070000	501810000	171070000	ENSG00000144560	ENSG00000007933	ENSG00000144560_ENSG00000007933	ENSG00000007933_ENSG00000144560	VGLL4	FMO3	11663710	171104360	6290	-34360	2.65801	Inf	3	1
50034	21854	chr3	chr1	11670000	219030000	501810000	219030000	ENSG00000144560	ENSG00000143353	ENSG00000144560_ENSG00000143353	ENSG00000143353_ENSG00000144560	VGLL4	LYPLAL1	11663710	219193367	6290	-163367	2.65801	Inf	3	1
50034	25228	chr3	chr2	11670000	4810000	501810000	253260000	ENSG00000144560	ENSG00000176887	ENSG00000144560_ENSG00000176887	ENSG00000176887_ENSG00000144560	VGLL4	SOX11	11663710	5696884	6290	-886884	2.65801	Inf	3	1
50058	4647	chr3	chr1	11910000	46960000	502050000	46960000	ENSG00000144559	ENSG00000187048	ENSG00000144559_ENSG00000187048	ENSG00000187048_ENSG00000144559	TAMM41	CYP4A11	11818680	46935330	91320	24670	2.65801	Inf	3	1
50058	16334	chr3	chr1	11910000	163830000	502050000	163830000	ENSG00000144559	ENSG00000143228	ENSG00000144559_ENSG00000143228	ENSG00000143228_ENSG00000144559	TAMM41	NUF2	11818680	163311170	91320	518830	2.65801	Inf	3	1
50058	16721	chr3	chr1	11910000	167700000	502050000	167700000	ENSG00000144559	ENSG00000198771	ENSG00000144559_ENSG00000198771	ENSG00000198771_ENSG00000144559	TAMM41	RCSD1	11818680	167669394	91320	30606	2.65801	Inf	3	1
50058	17056	chr3	chr1	11910000	171050000	502050000	171050000	ENSG00000144559	ENSG00000117501	ENSG00000144559_ENSG00000117501	ENSG00000117501_ENSG00000144559	TAMM41	MROH9	11818680	171000118	91320	49882	2.65801	Inf	3	1
50058	17058	chr3	chr1	11910000	171070000	502050000	171070000	ENSG00000144559	ENSG00000007933	ENSG00000144559_ENSG00000007933	ENSG00000007933_ENSG00000144559	TAMM41	FMO3	11818680	171104360	91320	-34360	2.65801	Inf	3	1
50058	21854	chr3	chr1	11910000	219030000	502050000	219030000	ENSG00000144559	ENSG00000143353	ENSG00000144559_ENSG00000143353	ENSG00000143353_ENSG00000144559	TAMM41	LYPLAL1	11818680	219193367	91320	-163367	2.65801	Inf	3	1
50058	25228	chr3	chr2	11910000	4810000	502050000	253260000	ENSG00000144559	ENSG00000176887	ENSG00000144559_ENSG00000176887	ENSG00000176887_ENSG00000144559	TAMM41	SOX11	11818680	5696884	91320	-886884	2.65801	Inf	3	1
51748	4647	chr3	chr1	28810000	46960000	518950000	46960000	ENSG00000283563	ENSG00000187048	ENSG00000283563_ENSG00000187048	ENSG00000187048_ENSG00000283563	AC098650.1	CYP4A11	29058358	46935330	-248358	24670	2.65801	Inf	3	1
51748	16334	chr3	chr1	28810000	163830000	518950000	163830000	ENSG00000283563	ENSG00000143228	ENSG00000283563_ENSG00000143228	ENSG00000143228_ENSG00000283563	AC098650.1	NUF2	29058358	163311170	-248358	518830	2.65801	Inf	3	1
51748	16721	chr3	chr1	28810000	167700000	518950000	167700000	ENSG00000283563	ENSG00000198771	ENSG00000283563_ENSG00000198771	ENSG00000198771_ENSG00000283563	AC098650.1	RCSD1	29058358	167669394	-248358	30606	2.65801	Inf	3	1
51748	17056	chr3	chr1	28810000	171050000	518950000	171050000	ENSG00000283563	ENSG00000117501	ENSG00000283563_ENSG00000117501	ENSG00000117501_ENSG00000283563	AC098650.1	MROH9	29058358	171000118	-248358	49882	2.65801	Inf	3	1
51748	17058	chr3	chr1	28810000	171070000	518950000	171070000	ENSG00000283563	ENSG00000007933	ENSG00000283563_ENSG00000007933	ENSG00000007933_ENSG00000283563	AC098650.1	FMO3	29058358	171104360	-248358	-34360	2.65801	Inf	3	1
51748	21854	chr3	chr1	28810000	219030000	518950000	219030000	ENSG00000283563	ENSG00000143353	ENSG00000283563_ENSG00000143353	ENSG00000143353_ENSG00000283563	AC098650.1	LYPLAL1	29058358	219193367	-248358	-163367	2.65801	Inf	3	1
51748	25228	chr3	chr2	28810000	4810000	518950000	253260000	ENSG00000283563	ENSG00000176887	ENSG00000283563_ENSG00000176887	ENSG00000176887_ENSG00000283563	AC098650.1	SOX11	29058358	5696884	-248358	-886884	2.65801	Inf	3	1
51748	50034	chr3	chr3	28810000	11670000	518950000	501810000	ENSG00000283563	ENSG00000144560	ENSG00000283563_ENSG00000144560	ENSG00000144560_ENSG00000283563	AC098650.1	VGLL4	29058358	11663710	-248358	6290	2.65801	Inf	3	1
51748	50058	chr3	chr3	28810000	11910000	518950000	502050000	ENSG00000283563	ENSG00000144559	ENSG00000283563_ENSG00000144559	ENSG00000144559_ENSG00000283563	AC098650.1	TAMM41	29058358	11818680	-248358	91320	2.65801	Inf	3	1
52175	4647	chr3	chr1	33080000	46960000	523220000	46960000	ENSG00000188167	ENSG00000187048	ENSG00000188167_ENSG00000187048	ENSG00000187048_ENSG00000188167	TMPPE	CYP4A11	33093784	46935330	-13784	24670	2.65801	Inf	3	1
52175	16334	chr3	chr1	33080000	163830000	523220000	163830000	ENSG00000188167	ENSG00000143228	ENSG00000188167_ENSG00000143228	ENSG00000143228_ENSG00000188167	TMPPE	NUF2	33093784	163311170	-13784	518830	2.65801	Inf	3	1
52175	16721	chr3	chr1	33080000	167700000	523220000	167700000	ENSG00000188167	ENSG00000198771	ENSG00000188167_ENSG00000198771	ENSG00000198771_ENSG00000188167	TMPPE	RCSD1	33093784	167669394	-13784	30606	2.65801	Inf	3	1
52175	17056	chr3	chr1	33080000	171050000	523220000	171050000	ENSG00000188167	ENSG00000117501	ENSG00000188167_ENSG00000117501	ENSG00000117501_ENSG00000188167	TMPPE	MROH9	33093784	171000118	-13784	49882	2.65801	Inf	3	1
52175	17058	chr3	chr1	33080000	171070000	523220000	171070000	ENSG00000188167	ENSG00000007933	ENSG00000188167_ENSG00000007933	ENSG00000007933_ENSG00000188167	TMPPE	FMO3	33093784	171104360	-13784	-34360	2.65801	Inf	3	1
52175	21854	chr3	chr1	33080000	219030000	523220000	219030000	ENSG00000188167	ENSG00000143353	ENSG00000188167_ENSG00000143353	ENSG00000143353_ENSG00000188167	TMPPE	LYPLAL1	33093784	219193367	-13784	-163367	2.65801	Inf	3	1
52175	25228	chr3	chr2	33080000	4810000	523220000	253260000	ENSG00000188167	ENSG00000176887	ENSG00000188167_ENSG00000176887	ENSG00000176887_ENSG00000188167	TMPPE	SOX11	33093784	5696884	-13784	-886884	2.65801	Inf	3	1
52175	50034	chr3	chr3	33080000	11670000	523220000	501810000	ENSG00000188167	ENSG00000144560	ENSG00000188167_ENSG00000144560	ENSG00000144560_ENSG00000188167	TMPPE	VGLL4	33093784	11663710	-13784	6290	2.65801	Inf	3	1
52175	50058	chr3	chr3	33080000	11910000	523220000	502050000	ENSG00000188167	ENSG00000144559	ENSG00000188167_ENSG00000144559	ENSG00000144559_ENSG00000188167	TMPPE	TAMM41	33093784	11818680	-13784	91320	2.65801	Inf	3	1
52175	51748	chr3	chr3	33080000	28810000	523220000	518950000	ENSG00000188167	ENSG00000283563	ENSG00000188167_ENSG00000283563	ENSG00000283563_ENSG00000188167	TMPPE	AC098650.1	33093784	29058358	-13784	-248358	2.65801	Inf	3	1
56142	9813	chr3	chr1	72750000	98620000	562890000	98620000	ENSG00000144736	ENSG00000162627	ENSG00000144736_ENSG00000162627	ENSG00000162627_ENSG00000144736	SHQ1	SNX7	72805596	98711100	-55596	-91100	3.13513	Inf	4	3
56142	38953	chr3	chr2	72750000	142060000	562890000	390510000	ENSG00000144736	ENSG00000168702	ENSG00000144736_ENSG00000168702	ENSG00000168702_ENSG00000144736	SHQ1	LRP1B	72805596	141181562	-55596	878438	3.13513	Inf	4	3
56563	32891	chr3	chr2	76960000	81440000	567100000	329890000	ENSG00000185008	ENSG00000162951	ENSG00000185008_ENSG00000162951	ENSG00000162951_ENSG00000185008	ROBO2	LRRTM1	76778330	80296552	181670	1143448	3.13513	Inf	4	0
62244	14328	chr3	chr1	133770000	143770000	623910000	143770000	ENSG00000091513	ENSG00000273213	ENSG00000091513_ENSG00000273213	ENSG00000273213_ENSG00000091513	TF	HIST2H3PS2	133771340	143900255	-1340	-130255	3.47756	Inf	5	0
63247	4647	chr3	chr1	143800000	46960000	633940000	46960000	ENSG00000181744	ENSG00000187048	ENSG00000181744_ENSG00000187048	ENSG00000187048_ENSG00000181744	DIPK2A	CYP4A11	144010258	46935330	-210258	24670	2.65801	Inf	3	1
63247	16334	chr3	chr1	143800000	163830000	633940000	163830000	ENSG00000181744	ENSG00000143228	ENSG00000181744_ENSG00000143228	ENSG00000143228_ENSG00000181744	DIPK2A	NUF2	144010258	163311170	-210258	518830	2.65801	Inf	3	1
63247	16721	chr3	chr1	143800000	167700000	633940000	167700000	ENSG00000181744	ENSG00000198771	ENSG00000181744_ENSG00000198771	ENSG00000198771_ENSG00000181744	DIPK2A	RCSD1	144010258	167669394	-210258	30606	2.65801	Inf	3	1
63247	17056	chr3	chr1	143800000	171050000	633940000	171050000	ENSG00000181744	ENSG00000117501	ENSG00000181744_ENSG00000117501	ENSG00000117501_ENSG00000181744	DIPK2A	MROH9	144010258	171000118	-210258	49882	2.65801	Inf	3	1
63247	17058	chr3	chr1	143800000	171070000	633940000	171070000	ENSG00000181744	ENSG00000007933	ENSG00000181744_ENSG00000007933	ENSG00000007933_ENSG00000181744	DIPK2A	FMO3	144010258	171104360	-210258	-34360	2.65801	Inf	3	1
63247	21854	chr3	chr1	143800000	219030000	633940000	219030000	ENSG00000181744	ENSG00000143353	ENSG00000181744_ENSG00000143353	ENSG00000143353_ENSG00000181744	DIPK2A	LYPLAL1	144010258	219193367	-210258	-163367	2.65801	Inf	3	1
63247	25228	chr3	chr2	143800000	4810000	633940000	253260000	ENSG00000181744	ENSG00000176887	ENSG00000181744_ENSG00000176887	ENSG00000176887_ENSG00000181744	DIPK2A	SOX11	144010258	5696884	-210258	-886884	2.65801	Inf	3	1
63247	50034	chr3	chr3	143800000	11670000	633940000	501810000	ENSG00000181744	ENSG00000144560	ENSG00000181744_ENSG00000144560	ENSG00000144560_ENSG00000181744	DIPK2A	VGLL4	144010258	11663710	-210258	6290	2.65801	Inf	3	1
63247	50058	chr3	chr3	143800000	11910000	633940000	502050000	ENSG00000181744	ENSG00000144559	ENSG00000181744_ENSG00000144559	ENSG00000144559_ENSG00000181744	DIPK2A	TAMM41	144010258	11818680	-210258	91320	2.65801	Inf	3	1
63247	51748	chr3	chr3	143800000	28810000	633940000	518950000	ENSG00000181744	ENSG00000283563	ENSG00000181744_ENSG00000283563	ENSG00000283563_ENSG00000181744	DIPK2A	AC098650.1	144010258	29058358	-210258	-248358	2.65801	Inf	3	1
63247	52175	chr3	chr3	143800000	33080000	633940000	523220000	ENSG00000181744	ENSG00000188167	ENSG00000181744_ENSG00000188167	ENSG00000188167_ENSG00000181744	DIPK2A	TMPPE	144010258	33093784	-210258	-13784	2.65801	Inf	3	1
68051	4647	chr3	chr1	191840000	46960000	681980000	46960000	ENSG00000253548	ENSG00000187048	ENSG00000253548_ENSG00000187048	ENSG00000187048_ENSG00000253548	PYDC2	CYP4A11	191461310	46935330	378690	24670	2.65801	Inf	3	1
68051	16334	chr3	chr1	191840000	163830000	681980000	163830000	ENSG00000253548	ENSG00000143228	ENSG00000253548_ENSG00000143228	ENSG00000143228_ENSG00000253548	PYDC2	NUF2	191461310	163311170	378690	518830	2.65801	Inf	3	1
68051	16721	chr3	chr1	191840000	167700000	681980000	167700000	ENSG00000253548	ENSG00000198771	ENSG00000253548_ENSG00000198771	ENSG00000198771_ENSG00000253548	PYDC2	RCSD1	191461310	167669394	378690	30606	2.65801	Inf	3	1
68051	17056	chr3	chr1	191840000	171050000	681980000	171050000	ENSG00000253548	ENSG00000117501	ENSG00000253548_ENSG00000117501	ENSG00000117501_ENSG00000253548	PYDC2	MROH9	191461310	171000118	378690	49882	2.65801	Inf	3	1
68051	17058	chr3	chr1	191840000	171070000	681980000	171070000	ENSG00000253548	ENSG00000007933	ENSG00000253548_ENSG00000007933	ENSG00000007933_ENSG00000253548	PYDC2	FMO3	191461310	171104360	378690	-34360	2.65801	Inf	3	1
68051	21854	chr3	chr1	191840000	219030000	681980000	219030000	ENSG00000253548	ENSG00000143353	ENSG00000253548_ENSG00000143353	ENSG00000143353_ENSG00000253548	PYDC2	LYPLAL1	191461310	219193367	378690	-163367	2.65801	Inf	3	1
68051	25228	chr3	chr2	191840000	4810000	681980000	253260000	ENSG00000253548	ENSG00000176887	ENSG00000253548_ENSG00000176887	ENSG00000176887_ENSG00000253548	PYDC2	SOX11	191461310	5696884	378690	-886884	2.65801	Inf	3	1
68051	50034	chr3	chr3	191840000	11670000	681980000	501810000	ENSG00000253548	ENSG00000144560	ENSG00000253548_ENSG00000144560	ENSG00000144560_ENSG00000253548	PYDC2	VGLL4	191461310	11663710	378690	6290	2.65801	Inf	3	1
68051	50058	chr3	chr3	191840000	11910000	681980000	502050000	ENSG00000253548	ENSG00000144559	ENSG00000253548_ENSG00000144559	ENSG00000144559_ENSG00000253548	PYDC2	TAMM41	191461310	11818680	378690	91320	2.65801	Inf	3	1
68051	51748	chr3	chr3	191840000	28810000	681980000	518950000	ENSG00000253548	ENSG00000283563	ENSG00000253548_ENSG00000283563	ENSG00000283563_ENSG00000253548	PYDC2	AC098650.1	191461310	29058358	378690	-248358	2.65801	Inf	3	1
68051	52175	chr3	chr3	191840000	33080000	681980000	523220000	ENSG00000253548	ENSG00000188167	ENSG00000253548_ENSG00000188167	ENSG00000188167_ENSG00000253548	PYDC2	TMPPE	191461310	33093784	378690	-13784	2.65801	Inf	3	1
68051	63247	chr3	chr3	191840000	143800000	681980000	633940000	ENSG00000253548	ENSG00000181744	ENSG00000253548_ENSG00000181744	ENSG00000181744_ENSG00000253548	PYDC2	DIPK2A	191461310	144010258	378690	-210258	2.65801	Inf	3	1
71577	2962	chr4	chr1	29800000	30110000	717730000	30110000	ENSG00000169851	ENSG00000162510	ENSG00000169851_ENSG00000162510	ENSG00000162510_ENSG00000169851	PCDH7	MATN1	30933610	30717431	-1133610	-607431	3.13513	Inf	4	0
71577	4506	chr4	chr1	29800000	45550000	717730000	45550000	ENSG00000169851	ENSG00000117448	ENSG00000169851_ENSG00000117448	ENSG00000117448_ENSG00000169851	PCDH7	AKR1A1	30933610	45560296	-1133610	-10296	3.13513	Inf	4	0
71577	5484	chr4	chr1	29800000	55330000	717730000	55330000	ENSG00000169851	ENSG00000162402	ENSG00000169851_ENSG00000162402	ENSG00000162402_ENSG00000169851	PCDH7	USP24	30933610	55140862	-1133610	189138	3.13513	Inf	4	0
71577	15328	chr4	chr1	29800000	153770000	717730000	153770000	ENSG00000169851	ENSG00000143554	ENSG00000169851_ENSG00000143554	ENSG00000143554_ENSG00000169851	PCDH7	SLC27A3	30933610	153777256	-1133610	-7256	3.13513	Inf	4	0
71577	34736	chr4	chr2	29800000	99890000	717730000	348340000	ENSG00000169851	ENSG00000144218	ENSG00000169851_ENSG00000144218	ENSG00000144218_ENSG00000169851	PCDH7	AFF3	30933610	99844079	-1133610	45921	3.13513	Inf	4	0
71577	35141	chr4	chr2	29800000	103940000	717730000	352390000	ENSG00000169851	ENSG00000198914	ENSG00000169851_ENSG00000198914	ENSG00000198914_ENSG00000169851	PCDH7	POU3F3	30933610	104857042	-1133610	-917042	3.13513	Inf	4	0
71577	39264	chr4	chr2	29800000	145170000	717730000	393620000	ENSG00000169851	ENSG00000169554	ENSG00000169851_ENSG00000169554	ENSG00000169554_ENSG00000169851	PCDH7	ZEB2	30933610	144442710	-1133610	727290	3.13513	Inf	4	0
71844	4647	chr4	chr1	32470000	46960000	720400000	46960000	ENSG00000169851	ENSG00000187048	ENSG00000169851_ENSG00000187048	ENSG00000187048_ENSG00000169851	PCDH7	CYP4A11	30933610	46935330	1536390	24670	2.65801	Inf	3	1
71844	16334	chr4	chr1	32470000	163830000	720400000	163830000	ENSG00000169851	ENSG00000143228	ENSG00000169851_ENSG00000143228	ENSG00000143228_ENSG00000169851	PCDH7	NUF2	30933610	163311170	1536390	518830	2.65801	Inf	3	1
71844	16721	chr4	chr1	32470000	167700000	720400000	167700000	ENSG00000169851	ENSG00000198771	ENSG00000169851_ENSG00000198771	ENSG00000198771_ENSG00000169851	PCDH7	RCSD1	30933610	167669394	1536390	30606	2.65801	Inf	3	1
71844	17056	chr4	chr1	32470000	171050000	720400000	171050000	ENSG00000169851	ENSG00000117501	ENSG00000169851_ENSG00000117501	ENSG00000117501_ENSG00000169851	PCDH7	MROH9	30933610	171000118	1536390	49882	2.65801	Inf	3	1
71844	17058	chr4	chr1	32470000	171070000	720400000	171070000	ENSG00000169851	ENSG00000007933	ENSG00000169851_ENSG00000007933	ENSG00000007933_ENSG00000169851	PCDH7	FMO3	30933610	171104360	1536390	-34360	2.65801	Inf	3	1
71844	21854	chr4	chr1	32470000	219030000	720400000	219030000	ENSG00000169851	ENSG00000143353	ENSG00000169851_ENSG00000143353	ENSG00000143353_ENSG00000169851	PCDH7	LYPLAL1	30933610	219193367	1536390	-163367	2.65801	Inf	3	1
71844	25228	chr4	chr2	32470000	4810000	720400000	253260000	ENSG00000169851	ENSG00000176887	ENSG00000169851_ENSG00000176887	ENSG00000176887_ENSG00000169851	PCDH7	SOX11	30933610	5696884	1536390	-886884	2.65801	Inf	3	1
71844	50034	chr4	chr3	32470000	11670000	720400000	501810000	ENSG00000169851	ENSG00000144560	ENSG00000169851_ENSG00000144560	ENSG00000144560_ENSG00000169851	PCDH7	VGLL4	30933610	11663710	1536390	6290	2.65801	Inf	3	1
71844	50058	chr4	chr3	32470000	11910000	720400000	502050000	ENSG00000169851	ENSG00000144559	ENSG00000169851_ENSG00000144559	ENSG00000144559_ENSG00000169851	PCDH7	TAMM41	30933610	11818680	1536390	91320	2.65801	Inf	3	1
71844	51748	chr4	chr3	32470000	28810000	720400000	518950000	ENSG00000169851	ENSG00000283563	ENSG00000169851_ENSG00000283563	ENSG00000283563_ENSG00000169851	PCDH7	AC098650.1	30933610	29058358	1536390	-248358	2.65801	Inf	3	1
71844	52175	chr4	chr3	32470000	33080000	720400000	523220000	ENSG00000169851	ENSG00000188167	ENSG00000169851_ENSG00000188167	ENSG00000188167_ENSG00000169851	PCDH7	TMPPE	30933610	33093784	1536390	-13784	2.65801	Inf	3	1
71844	63247	chr4	chr3	32470000	143800000	720400000	633940000	ENSG00000169851	ENSG00000181744	ENSG00000169851_ENSG00000181744	ENSG00000181744_ENSG00000169851	PCDH7	DIPK2A	30933610	144010258	1536390	-210258	2.65801	Inf	3	1
71844	68051	chr4	chr3	32470000	191840000	720400000	681980000	ENSG00000169851	ENSG00000253548	ENSG00000169851_ENSG00000253548	ENSG00000253548_ENSG00000169851	PCDH7	PYDC2	30933610	191461310	1536390	378690	2.65801	Inf	3	1
72946	15425	chr4	chr1	43490000	154740000	731420000	154740000	ENSG00000215203	ENSG00000143603	ENSG00000215203_ENSG00000143603	ENSG00000143603_ENSG00000215203	GRXCR1	KCNN3	42961962	154783868	528038	-43868	3.13513	Inf	4	0
72946	19576	chr4	chr1	43490000	196250000	731420000	196250000	ENSG00000215203	ENSG00000162687	ENSG00000215203_ENSG00000162687	ENSG00000162687_ENSG00000215203	GRXCR1	KCNT2	42961962	196417502	528038	-167502	3.13513	Inf	4	0
72946	24877	chr4	chr2	43490000	1300000	731420000	249750000	ENSG00000215203	ENSG00000172554	ENSG00000215203_ENSG00000172554	ENSG00000172554_ENSG00000215203	GRXCR1	SNTG2	42961962	1159231	528038	140769	3.13513	Inf	4	0
72946	29341	chr4	chr2	43490000	45940000	731420000	294390000	ENSG00000215203	ENSG00000171132	ENSG00000215203_ENSG00000171132	ENSG00000171132_ENSG00000215203	GRXCR1	PRKCE	42961962	45919668	528038	20332	3.13513	Inf	4	0
74523	14974	chr4	chr1	59260000	150230000	747190000	150230000	ENSG00000163453	ENSG00000143401	ENSG00000163453_ENSG00000143401	ENSG00000143401_ENSG00000163453	IGFBP7	ANP32E	57070579	150227286	2189421	2714	3.47756	Inf	5	0
78926	2962	chr4	chr1	103290000	30110000	791220000	30110000	ENSG00000138778	ENSG00000162510	ENSG00000138778_ENSG00000162510	ENSG00000162510_ENSG00000138778	CENPE	MATN1	103152108	30717431	137892	-607431	3.13513	Inf	4	2
78926	4506	chr4	chr1	103290000	45550000	791220000	45550000	ENSG00000138778	ENSG00000117448	ENSG00000138778_ENSG00000117448	ENSG00000117448_ENSG00000138778	CENPE	AKR1A1	103152108	45560296	137892	-10296	3.13513	Inf	4	2
78926	5484	chr4	chr1	103290000	55330000	791220000	55330000	ENSG00000138778	ENSG00000162402	ENSG00000138778_ENSG00000162402	ENSG00000162402_ENSG00000138778	CENPE	USP24	103152108	55140862	137892	189138	3.13513	Inf	4	2
78926	15328	chr4	chr1	103290000	153770000	791220000	153770000	ENSG00000138778	ENSG00000143554	ENSG00000138778_ENSG00000143554	ENSG00000143554_ENSG00000138778	CENPE	SLC27A3	103152108	153777256	137892	-7256	3.13513	Inf	4	2
78926	34736	chr4	chr2	103290000	99890000	791220000	348340000	ENSG00000138778	ENSG00000144218	ENSG00000138778_ENSG00000144218	ENSG00000144218_ENSG00000138778	CENPE	AFF3	103152108	99844079	137892	45921	3.13513	Inf	4	2
78926	35141	chr4	chr2	103290000	103940000	791220000	352390000	ENSG00000138778	ENSG00000198914	ENSG00000138778_ENSG00000198914	ENSG00000198914_ENSG00000138778	CENPE	POU3F3	103152108	104857042	137892	-917042	3.13513	Inf	4	2
78926	39264	chr4	chr2	103290000	145170000	791220000	393620000	ENSG00000138778	ENSG00000169554	ENSG00000138778_ENSG00000169554	ENSG00000169554_ENSG00000138778	CENPE	ZEB2	103152108	144442710	137892	727290	3.13513	Inf	4	2
78926	71577	chr4	chr4	103290000	29800000	791220000	717730000	ENSG00000138778	ENSG00000169851	ENSG00000138778_ENSG00000169851	ENSG00000169851_ENSG00000138778	CENPE	PCDH7	103152108	30933610	137892	-1133610	3.13513	Inf	4	0
81177	5475	chr4	chr1	125800000	55240000	813730000	55240000	ENSG00000196159	ENSG00000162402	ENSG00000196159_ENSG00000162402	ENSG00000162402_ENSG00000196159	FAT4	USP24	125404666	55140862	395334	99138	3.47756	Inf	5	0
81177	21260	chr4	chr1	125800000	213090000	813730000	213090000	ENSG00000196159	ENSG00000136643	ENSG00000196159_ENSG00000136643	ENSG00000136643_ENSG00000196159	FAT4	RPS6KC1	125404666	213163004	395334	-73004	3.47756	Inf	5	0
86574	4647	chr4	chr1	179770000	46960000	867700000	46960000	ENSG00000038002	ENSG00000187048	ENSG00000038002_ENSG00000187048	ENSG00000187048_ENSG00000038002	AGA	CYP4A11	177436606	46935330	2333394	24670	2.65801	Inf	3	1
86574	16334	chr4	chr1	179770000	163830000	867700000	163830000	ENSG00000038002	ENSG00000143228	ENSG00000038002_ENSG00000143228	ENSG00000143228_ENSG00000038002	AGA	NUF2	177436606	163311170	2333394	518830	2.65801	Inf	3	1
86574	16721	chr4	chr1	179770000	167700000	867700000	167700000	ENSG00000038002	ENSG00000198771	ENSG00000038002_ENSG00000198771	ENSG00000198771_ENSG00000038002	AGA	RCSD1	177436606	167669394	2333394	30606	2.65801	Inf	3	1
86574	17056	chr4	chr1	179770000	171050000	867700000	171050000	ENSG00000038002	ENSG00000117501	ENSG00000038002_ENSG00000117501	ENSG00000117501_ENSG00000038002	AGA	MROH9	177436606	171000118	2333394	49882	2.65801	Inf	3	1
86574	17058	chr4	chr1	179770000	171070000	867700000	171070000	ENSG00000038002	ENSG00000007933	ENSG00000038002_ENSG00000007933	ENSG00000007933_ENSG00000038002	AGA	FMO3	177436606	171104360	2333394	-34360	2.65801	Inf	3	1
86574	21854	chr4	chr1	179770000	219030000	867700000	219030000	ENSG00000038002	ENSG00000143353	ENSG00000038002_ENSG00000143353	ENSG00000143353_ENSG00000038002	AGA	LYPLAL1	177436606	219193367	2333394	-163367	2.65801	Inf	3	1
86574	25228	chr4	chr2	179770000	4810000	867700000	253260000	ENSG00000038002	ENSG00000176887	ENSG00000038002_ENSG00000176887	ENSG00000176887_ENSG00000038002	AGA	SOX11	177436606	5696884	2333394	-886884	2.65801	Inf	3	1
86574	50034	chr4	chr3	179770000	11670000	867700000	501810000	ENSG00000038002	ENSG00000144560	ENSG00000038002_ENSG00000144560	ENSG00000144560_ENSG00000038002	AGA	VGLL4	177436606	11663710	2333394	6290	2.65801	Inf	3	1
86574	50058	chr4	chr3	179770000	11910000	867700000	502050000	ENSG00000038002	ENSG00000144559	ENSG00000038002_ENSG00000144559	ENSG00000144559_ENSG00000038002	AGA	TAMM41	177436606	11818680	2333394	91320	2.65801	Inf	3	1
86574	51748	chr4	chr3	179770000	28810000	867700000	518950000	ENSG00000038002	ENSG00000283563	ENSG00000038002_ENSG00000283563	ENSG00000283563_ENSG00000038002	AGA	AC098650.1	177436606	29058358	2333394	-248358	2.65801	Inf	3	1
86574	52175	chr4	chr3	179770000	33080000	867700000	523220000	ENSG00000038002	ENSG00000188167	ENSG00000038002_ENSG00000188167	ENSG00000188167_ENSG00000038002	AGA	TMPPE	177436606	33093784	2333394	-13784	2.65801	Inf	3	1
86574	63247	chr4	chr3	179770000	143800000	867700000	633940000	ENSG00000038002	ENSG00000181744	ENSG00000038002_ENSG00000181744	ENSG00000181744_ENSG00000038002	AGA	DIPK2A	177436606	144010258	2333394	-210258	2.65801	Inf	3	1
86574	68051	chr4	chr3	179770000	191840000	867700000	681980000	ENSG00000038002	ENSG00000253548	ENSG00000038002_ENSG00000253548	ENSG00000253548_ENSG00000038002	AGA	PYDC2	177436606	191461310	2333394	378690	2.65801	Inf	3	1
86574	71844	chr4	chr4	179770000	32470000	867700000	720400000	ENSG00000038002	ENSG00000169851	ENSG00000038002_ENSG00000169851	ENSG00000169851_ENSG00000038002	AGA	PCDH7	177436606	30933610	2333394	1536390	2.65801	Inf	3	1
86737	2962	chr4	chr1	181400000	30110000	869330000	30110000	ENSG00000218336	ENSG00000162510	ENSG00000218336_ENSG00000162510	ENSG00000162510_ENSG00000218336	TENM3	MATN1	182473506	30717431	-1073506	-607431	3.13513	Inf	4	2
86737	4506	chr4	chr1	181400000	45550000	869330000	45550000	ENSG00000218336	ENSG00000117448	ENSG00000218336_ENSG00000117448	ENSG00000117448_ENSG00000218336	TENM3	AKR1A1	182473506	45560296	-1073506	-10296	3.13513	Inf	4	2
86737	5484	chr4	chr1	181400000	55330000	869330000	55330000	ENSG00000218336	ENSG00000162402	ENSG00000218336_ENSG00000162402	ENSG00000162402_ENSG00000218336	TENM3	USP24	182473506	55140862	-1073506	189138	3.13513	Inf	4	2
86737	15328	chr4	chr1	181400000	153770000	869330000	153770000	ENSG00000218336	ENSG00000143554	ENSG00000218336_ENSG00000143554	ENSG00000143554_ENSG00000218336	TENM3	SLC27A3	182473506	153777256	-1073506	-7256	3.13513	Inf	4	2
86737	34736	chr4	chr2	181400000	99890000	869330000	348340000	ENSG00000218336	ENSG00000144218	ENSG00000218336_ENSG00000144218	ENSG00000144218_ENSG00000218336	TENM3	AFF3	182473506	99844079	-1073506	45921	3.13513	Inf	4	2
86737	35141	chr4	chr2	181400000	103940000	869330000	352390000	ENSG00000218336	ENSG00000198914	ENSG00000218336_ENSG00000198914	ENSG00000198914_ENSG00000218336	TENM3	POU3F3	182473506	104857042	-1073506	-917042	3.13513	Inf	4	2
86737	39264	chr4	chr2	181400000	145170000	869330000	393620000	ENSG00000218336	ENSG00000169554	ENSG00000218336_ENSG00000169554	ENSG00000169554_ENSG00000218336	TENM3	ZEB2	182473506	144442710	-1073506	727290	3.13513	Inf	4	2
86737	71577	chr4	chr4	181400000	29800000	869330000	717730000	ENSG00000218336	ENSG00000169851	ENSG00000218336_ENSG00000169851	ENSG00000169851_ENSG00000218336	TENM3	PCDH7	182473506	30933610	-1073506	-1133610	3.13513	Inf	4	0
86737	78926	chr4	chr4	181400000	103290000	869330000	791220000	ENSG00000218336	ENSG00000138778	ENSG00000218336_ENSG00000138778	ENSG00000138778_ENSG00000218336	TENM3	CENPE	182473506	103152108	-1073506	137892	3.13513	Inf	4	2
87571	1536	chr5	chr1	520000	15850000	878160000	15850000	ENSG00000066230	ENSG00000233954	ENSG00000066230_ENSG00000233954	ENSG00000233954_ENSG00000066230	SLC9A3	UQCRHL	497395	15808258	22605	41742	3.47756	Inf	5	4
87571	2744	chr5	chr1	520000	27930000	878160000	27930000	ENSG00000066230	ENSG00000130768	ENSG00000066230_ENSG00000130768	ENSG00000130768_ENSG00000066230	SLC9A3	SMPDL3B	497395	27947078	22605	-17078	3.47756	Inf	5	4
87571	6123	chr5	chr1	520000	61720000	878160000	61720000	ENSG00000066230	ENSG00000162604	ENSG00000066230_ENSG00000162604	ENSG00000162604_ENSG00000066230	SLC9A3	TM2D1	497395	61703234	22605	16766	3.47756	Inf	5	4
87571	34805	chr5	chr2	520000	100580000	878160000	349030000	ENSG00000066230	ENSG00000115539	ENSG00000066230_ENSG00000115539	ENSG00000115539_ENSG00000066230	SLC9A3	PDCL3	497395	100569866	22605	10134	3.47756	Inf	5	4
87593	1536	chr5	chr1	740000	15850000	878380000	15850000	ENSG00000286094	ENSG00000233954	ENSG00000286094_ENSG00000233954	ENSG00000233954_ENSG00000286094	AC026740.3	UQCRHL	741864	15808258	-1864	41742	3.47756	Inf	5	4
87593	2744	chr5	chr1	740000	27930000	878380000	27930000	ENSG00000286094	ENSG00000130768	ENSG00000286094_ENSG00000130768	ENSG00000130768_ENSG00000286094	AC026740.3	SMPDL3B	741864	27947078	-1864	-17078	3.47756	Inf	5	4
87593	6123	chr5	chr1	740000	61720000	878380000	61720000	ENSG00000286094	ENSG00000162604	ENSG00000286094_ENSG00000162604	ENSG00000162604_ENSG00000286094	AC026740.3	TM2D1	741864	61703234	-1864	16766	3.47756	Inf	5	4
87593	34805	chr5	chr2	740000	100580000	878380000	349030000	ENSG00000286094	ENSG00000115539	ENSG00000286094_ENSG00000115539	ENSG00000115539_ENSG00000286094	AC026740.3	PDCL3	741864	100569866	-1864	10134	3.47756	Inf	5	4
89134	4647	chr5	chr1	16150000	46960000	893790000	46960000	ENSG00000183654	ENSG00000187048	ENSG00000183654_ENSG00000187048	ENSG00000187048_ENSG00000183654	2021-03-11	CYP4A11	16123950	46935330	26050	24670	2.65801	Inf	3	1
89134	16334	chr5	chr1	16150000	163830000	893790000	163830000	ENSG00000183654	ENSG00000143228	ENSG00000183654_ENSG00000143228	ENSG00000143228_ENSG00000183654	2021-03-11	NUF2	16123950	163311170	26050	518830	2.65801	Inf	3	1
89134	16721	chr5	chr1	16150000	167700000	893790000	167700000	ENSG00000183654	ENSG00000198771	ENSG00000183654_ENSG00000198771	ENSG00000198771_ENSG00000183654	2021-03-11	RCSD1	16123950	167669394	26050	30606	2.65801	Inf	3	1
89134	17056	chr5	chr1	16150000	171050000	893790000	171050000	ENSG00000183654	ENSG00000117501	ENSG00000183654_ENSG00000117501	ENSG00000117501_ENSG00000183654	2021-03-11	MROH9	16123950	171000118	26050	49882	2.65801	Inf	3	1
89134	17058	chr5	chr1	16150000	171070000	893790000	171070000	ENSG00000183654	ENSG00000007933	ENSG00000183654_ENSG00000007933	ENSG00000007933_ENSG00000183654	2021-03-11	FMO3	16123950	171104360	26050	-34360	2.65801	Inf	3	1
89134	21854	chr5	chr1	16150000	219030000	893790000	219030000	ENSG00000183654	ENSG00000143353	ENSG00000183654_ENSG00000143353	ENSG00000143353_ENSG00000183654	2021-03-11	LYPLAL1	16123950	219193367	26050	-163367	2.65801	Inf	3	1
89134	25228	chr5	chr2	16150000	4810000	893790000	253260000	ENSG00000183654	ENSG00000176887	ENSG00000183654_ENSG00000176887	ENSG00000176887_ENSG00000183654	2021-03-11	SOX11	16123950	5696884	26050	-886884	2.65801	Inf	3	1
89134	50034	chr5	chr3	16150000	11670000	893790000	501810000	ENSG00000183654	ENSG00000144560	ENSG00000183654_ENSG00000144560	ENSG00000144560_ENSG00000183654	2021-03-11	VGLL4	16123950	11663710	26050	6290	2.65801	Inf	3	1
89134	50058	chr5	chr3	16150000	11910000	893790000	502050000	ENSG00000183654	ENSG00000144559	ENSG00000183654_ENSG00000144559	ENSG00000144559_ENSG00000183654	2021-03-11	TAMM41	16123950	11818680	26050	91320	2.65801	Inf	3	1
89134	51748	chr5	chr3	16150000	28810000	893790000	518950000	ENSG00000183654	ENSG00000283563	ENSG00000183654_ENSG00000283563	ENSG00000283563_ENSG00000183654	2021-03-11	AC098650.1	16123950	29058358	26050	-248358	2.65801	Inf	3	1
89134	52175	chr5	chr3	16150000	33080000	893790000	523220000	ENSG00000183654	ENSG00000188167	ENSG00000183654_ENSG00000188167	ENSG00000188167_ENSG00000183654	2021-03-11	TMPPE	16123950	33093784	26050	-13784	2.65801	Inf	3	1
89134	63247	chr5	chr3	16150000	143800000	893790000	633940000	ENSG00000183654	ENSG00000181744	ENSG00000183654_ENSG00000181744	ENSG00000181744_ENSG00000183654	2021-03-11	DIPK2A	16123950	144010258	26050	-210258	2.65801	Inf	3	1
89134	68051	chr5	chr3	16150000	191840000	893790000	681980000	ENSG00000183654	ENSG00000253548	ENSG00000183654_ENSG00000253548	ENSG00000253548_ENSG00000183654	2021-03-11	PYDC2	16123950	191461310	26050	378690	2.65801	Inf	3	1
89134	71844	chr5	chr4	16150000	32470000	893790000	720400000	ENSG00000183654	ENSG00000169851	ENSG00000183654_ENSG00000169851	ENSG00000169851_ENSG00000183654	2021-03-11	PCDH7	16123950	30933610	26050	1536390	2.65801	Inf	3	1
89134	86574	chr5	chr4	16150000	179770000	893790000	867700000	ENSG00000183654	ENSG00000038002	ENSG00000183654_ENSG00000038002	ENSG00000038002_ENSG00000183654	2021-03-11	AGA	16123950	177436606	26050	2333394	2.65801	Inf	3	1
89828	4647	chr5	chr1	23090000	46960000	900730000	46960000	ENSG00000164256	ENSG00000187048	ENSG00000164256_ENSG00000187048	ENSG00000187048_ENSG00000164256	PRDM9	CYP4A11	23486092	46935330	-396092	24670	2.65801	Inf	3	1
89828	16334	chr5	chr1	23090000	163830000	900730000	163830000	ENSG00000164256	ENSG00000143228	ENSG00000164256_ENSG00000143228	ENSG00000143228_ENSG00000164256	PRDM9	NUF2	23486092	163311170	-396092	518830	2.65801	Inf	3	1
89828	16721	chr5	chr1	23090000	167700000	900730000	167700000	ENSG00000164256	ENSG00000198771	ENSG00000164256_ENSG00000198771	ENSG00000198771_ENSG00000164256	PRDM9	RCSD1	23486092	167669394	-396092	30606	2.65801	Inf	3	1
89828	17056	chr5	chr1	23090000	171050000	900730000	171050000	ENSG00000164256	ENSG00000117501	ENSG00000164256_ENSG00000117501	ENSG00000117501_ENSG00000164256	PRDM9	MROH9	23486092	171000118	-396092	49882	2.65801	Inf	3	1
89828	17058	chr5	chr1	23090000	171070000	900730000	171070000	ENSG00000164256	ENSG00000007933	ENSG00000164256_ENSG00000007933	ENSG00000007933_ENSG00000164256	PRDM9	FMO3	23486092	171104360	-396092	-34360	2.65801	Inf	3	1
89828	21854	chr5	chr1	23090000	219030000	900730000	219030000	ENSG00000164256	ENSG00000143353	ENSG00000164256_ENSG00000143353	ENSG00000143353_ENSG00000164256	PRDM9	LYPLAL1	23486092	219193367	-396092	-163367	2.65801	Inf	3	1
89828	25228	chr5	chr2	23090000	4810000	900730000	253260000	ENSG00000164256	ENSG00000176887	ENSG00000164256_ENSG00000176887	ENSG00000176887_ENSG00000164256	PRDM9	SOX11	23486092	5696884	-396092	-886884	2.65801	Inf	3	1
89828	50034	chr5	chr3	23090000	11670000	900730000	501810000	ENSG00000164256	ENSG00000144560	ENSG00000164256_ENSG00000144560	ENSG00000144560_ENSG00000164256	PRDM9	VGLL4	23486092	11663710	-396092	6290	2.65801	Inf	3	1
89828	50058	chr5	chr3	23090000	11910000	900730000	502050000	ENSG00000164256	ENSG00000144559	ENSG00000164256_ENSG00000144559	ENSG00000144559_ENSG00000164256	PRDM9	TAMM41	23486092	11818680	-396092	91320	2.65801	Inf	3	1
89828	51748	chr5	chr3	23090000	28810000	900730000	518950000	ENSG00000164256	ENSG00000283563	ENSG00000164256_ENSG00000283563	ENSG00000283563_ENSG00000164256	PRDM9	AC098650.1	23486092	29058358	-396092	-248358	2.65801	Inf	3	1
89828	52175	chr5	chr3	23090000	33080000	900730000	523220000	ENSG00000164256	ENSG00000188167	ENSG00000164256_ENSG00000188167	ENSG00000188167_ENSG00000164256	PRDM9	TMPPE	23486092	33093784	-396092	-13784	2.65801	Inf	3	1
89828	63247	chr5	chr3	23090000	143800000	900730000	633940000	ENSG00000164256	ENSG00000181744	ENSG00000164256_ENSG00000181744	ENSG00000181744_ENSG00000164256	PRDM9	DIPK2A	23486092	144010258	-396092	-210258	2.65801	Inf	3	1
89828	68051	chr5	chr3	23090000	191840000	900730000	681980000	ENSG00000164256	ENSG00000253548	ENSG00000164256_ENSG00000253548	ENSG00000253548_ENSG00000164256	PRDM9	PYDC2	23486092	191461310	-396092	378690	2.65801	Inf	3	1
89828	71844	chr5	chr4	23090000	32470000	900730000	720400000	ENSG00000164256	ENSG00000169851	ENSG00000164256_ENSG00000169851	ENSG00000169851_ENSG00000164256	PRDM9	PCDH7	23486092	30933610	-396092	1536390	2.65801	Inf	3	1
89828	86574	chr5	chr4	23090000	179770000	900730000	867700000	ENSG00000164256	ENSG00000038002	ENSG00000164256_ENSG00000038002	ENSG00000038002_ENSG00000164256	PRDM9	AGA	23486092	177436606	-396092	2333394	2.65801	Inf	3	1
89828	89134	chr5	chr5	23090000	16150000	900730000	893790000	ENSG00000164256	ENSG00000183654	ENSG00000164256_ENSG00000183654	ENSG00000183654_ENSG00000164256	PRDM9	2021-03-11	23486092	16123950	-396092	26050	2.65801	Inf	3	1
90043	5475	chr5	chr1	25240000	55240000	902880000	55240000	ENSG00000040731	ENSG00000162402	ENSG00000040731_ENSG00000162402	ENSG00000162402_ENSG00000040731	CDH10	USP24	24566039	55140862	673961	99138	3.47756	Inf	5	0
90043	21260	chr5	chr1	25240000	213090000	902880000	213090000	ENSG00000040731	ENSG00000136643	ENSG00000040731_ENSG00000136643	ENSG00000136643_ENSG00000040731	CDH10	RPS6KC1	24566039	213163004	673961	-73004	3.47756	Inf	5	0
90043	81177	chr5	chr4	25240000	125800000	902880000	813730000	ENSG00000040731	ENSG00000196159	ENSG00000040731_ENSG00000196159	ENSG00000196159_ENSG00000040731	CDH10	FAT4	24566039	125404666	673961	395334	3.47756	Inf	5	0
99357	28201	chr5	chr2	118380000	34540000	996020000	282990000	ENSG00000169570	ENSG00000119812	ENSG00000169570_ENSG00000119812	ENSG00000119812_ENSG00000169570	DTWD2	FAM98A	118912310	33591521	-532310	948479	2.02119	Inf	2	5
99357	30442	chr5	chr2	118380000	56950000	996020000	305400000	ENSG00000169570	ENSG00000055813	ENSG00000169570_ENSG00000055813	ENSG00000055813_ENSG00000169570	DTWD2	CCDC85A	118912310	56285081	-532310	664919	2.02119	Inf	2	5
99357	48694	chr5	chr2	118380000	239470000	996020000	487920000	ENSG00000169570	ENSG00000068024	ENSG00000169570_ENSG00000068024	ENSG00000068024_ENSG00000169570	DTWD2	HDAC4	118912310	239224911	-532310	245089	2.02119	Inf	2	5
99357	48711	chr5	chr2	118380000	239640000	996020000	488090000	ENSG00000169570	ENSG00000130414	ENSG00000169570_ENSG00000130414	ENSG00000130414_ENSG00000169570	DTWD2	NDUFA10	118912310	239958898	-532310	-318898	2.02119	Inf	2	5
101840	4647	chr5	chr1	143210000	46960000	1020850000	46960000	ENSG00000113580	ENSG00000187048	ENSG00000113580_ENSG00000187048	ENSG00000187048_ENSG00000113580	NR3C1	CYP4A11	143356722	46935330	-146722	24670	2.65801	Inf	3	1
101840	16334	chr5	chr1	143210000	163830000	1020850000	163830000	ENSG00000113580	ENSG00000143228	ENSG00000113580_ENSG00000143228	ENSG00000143228_ENSG00000113580	NR3C1	NUF2	143356722	163311170	-146722	518830	2.65801	Inf	3	1
101840	16721	chr5	chr1	143210000	167700000	1020850000	167700000	ENSG00000113580	ENSG00000198771	ENSG00000113580_ENSG00000198771	ENSG00000198771_ENSG00000113580	NR3C1	RCSD1	143356722	167669394	-146722	30606	2.65801	Inf	3	1
101840	17056	chr5	chr1	143210000	171050000	1020850000	171050000	ENSG00000113580	ENSG00000117501	ENSG00000113580_ENSG00000117501	ENSG00000117501_ENSG00000113580	NR3C1	MROH9	143356722	171000118	-146722	49882	2.65801	Inf	3	1
101840	17058	chr5	chr1	143210000	171070000	1020850000	171070000	ENSG00000113580	ENSG00000007933	ENSG00000113580_ENSG00000007933	ENSG00000007933_ENSG00000113580	NR3C1	FMO3	143356722	171104360	-146722	-34360	2.65801	Inf	3	1
101840	21854	chr5	chr1	143210000	219030000	1020850000	219030000	ENSG00000113580	ENSG00000143353	ENSG00000113580_ENSG00000143353	ENSG00000143353_ENSG00000113580	NR3C1	LYPLAL1	143356722	219193367	-146722	-163367	2.65801	Inf	3	1
101840	25228	chr5	chr2	143210000	4810000	1020850000	253260000	ENSG00000113580	ENSG00000176887	ENSG00000113580_ENSG00000176887	ENSG00000176887_ENSG00000113580	NR3C1	SOX11	143356722	5696884	-146722	-886884	2.65801	Inf	3	1
101840	50034	chr5	chr3	143210000	11670000	1020850000	501810000	ENSG00000113580	ENSG00000144560	ENSG00000113580_ENSG00000144560	ENSG00000144560_ENSG00000113580	NR3C1	VGLL4	143356722	11663710	-146722	6290	2.65801	Inf	3	1
101840	50058	chr5	chr3	143210000	11910000	1020850000	502050000	ENSG00000113580	ENSG00000144559	ENSG00000113580_ENSG00000144559	ENSG00000144559_ENSG00000113580	NR3C1	TAMM41	143356722	11818680	-146722	91320	2.65801	Inf	3	1
101840	51748	chr5	chr3	143210000	28810000	1020850000	518950000	ENSG00000113580	ENSG00000283563	ENSG00000113580_ENSG00000283563	ENSG00000283563_ENSG00000113580	NR3C1	AC098650.1	143356722	29058358	-146722	-248358	2.65801	Inf	3	1
101840	52175	chr5	chr3	143210000	33080000	1020850000	523220000	ENSG00000113580	ENSG00000188167	ENSG00000113580_ENSG00000188167	ENSG00000188167_ENSG00000113580	NR3C1	TMPPE	143356722	33093784	-146722	-13784	2.65801	Inf	3	1
101840	63247	chr5	chr3	143210000	143800000	1020850000	633940000	ENSG00000113580	ENSG00000181744	ENSG00000113580_ENSG00000181744	ENSG00000181744_ENSG00000113580	NR3C1	DIPK2A	143356722	144010258	-146722	-210258	2.65801	Inf	3	1
101840	68051	chr5	chr3	143210000	191840000	1020850000	681980000	ENSG00000113580	ENSG00000253548	ENSG00000113580_ENSG00000253548	ENSG00000253548_ENSG00000113580	NR3C1	PYDC2	143356722	191461310	-146722	378690	2.65801	Inf	3	1
101840	71844	chr5	chr4	143210000	32470000	1020850000	720400000	ENSG00000113580	ENSG00000169851	ENSG00000113580_ENSG00000169851	ENSG00000169851_ENSG00000113580	NR3C1	PCDH7	143356722	30933610	-146722	1536390	2.65801	Inf	3	1
101840	86574	chr5	chr4	143210000	179770000	1020850000	867700000	ENSG00000113580	ENSG00000038002	ENSG00000113580_ENSG00000038002	ENSG00000038002_ENSG00000113580	NR3C1	AGA	143356722	177436606	-146722	2333394	2.65801	Inf	3	1
101840	89134	chr5	chr5	143210000	16150000	1020850000	893790000	ENSG00000113580	ENSG00000183654	ENSG00000113580_ENSG00000183654	ENSG00000183654_ENSG00000113580	NR3C1	2021-03-11	143356722	16123950	-146722	26050	2.65801	Inf	3	1
101840	89828	chr5	chr5	143210000	23090000	1020850000	900730000	ENSG00000113580	ENSG00000164256	ENSG00000113580_ENSG00000164256	ENSG00000164256_ENSG00000113580	NR3C1	PRDM9	143356722	23486092	-146722	-396092	2.65801	Inf	3	1
104371	8662	chr5	chr1	168520000	87110000	1046160000	87110000	ENSG00000188573	ENSG00000267561	ENSG00000188573_ENSG00000267561	ENSG00000267561_ENSG00000188573	FBLL1	AC093155.3	168529875	87081106	-9875	28894	3.6994	Inf	6	0
104371	40208	chr5	chr2	168520000	154610000	1046160000	403060000	ENSG00000188573	ENSG00000162989	ENSG00000188573_ENSG00000162989	ENSG00000162989_ENSG00000188573	FBLL1	KCNJ3	168529875	154778104	-9875	-168104	3.6994	Inf	6	0
104583	1536	chr5	chr1	170640000	15850000	1048280000	15850000	ENSG00000182132	ENSG00000233954	ENSG00000182132_ENSG00000233954	ENSG00000233954_ENSG00000182132	KCNIP1	UQCRHL	170545060	15808258	94940	41742	3.47756	Inf	5	4
104583	2744	chr5	chr1	170640000	27930000	1048280000	27930000	ENSG00000182132	ENSG00000130768	ENSG00000182132_ENSG00000130768	ENSG00000130768_ENSG00000182132	KCNIP1	SMPDL3B	170545060	27947078	94940	-17078	3.47756	Inf	5	4
104583	6123	chr5	chr1	170640000	61720000	1048280000	61720000	ENSG00000182132	ENSG00000162604	ENSG00000182132_ENSG00000162604	ENSG00000162604_ENSG00000182132	KCNIP1	TM2D1	170545060	61703234	94940	16766	3.47756	Inf	5	4
104583	34805	chr5	chr2	170640000	100580000	1048280000	349030000	ENSG00000182132	ENSG00000115539	ENSG00000182132_ENSG00000115539	ENSG00000115539_ENSG00000182132	KCNIP1	PDCL3	170545060	100569866	94940	10134	3.47756	Inf	5	4
104583	87571	chr5	chr5	170640000	520000	1048280000	878160000	ENSG00000182132	ENSG00000066230	ENSG00000182132_ENSG00000066230	ENSG00000066230_ENSG00000182132	KCNIP1	SLC9A3	170545060	497395	94940	22605	3.47756	Inf	5	4
104583	87593	chr5	chr5	170640000	740000	1048280000	878380000	ENSG00000182132	ENSG00000286094	ENSG00000182132_ENSG00000286094	ENSG00000286094_ENSG00000182132	KCNIP1	AC026740.3	170545060	741864	94940	-1864	3.47756	Inf	5	4
106738	4647	chr6	chr1	11650000	46960000	1070320000	46960000	ENSG00000205269	ENSG00000187048	ENSG00000205269_ENSG00000187048	ENSG00000187048_ENSG00000205269	TMEM170B	CYP4A11	11560636	46935330	89364	24670	2.65801	Inf	3	1
106738	16334	chr6	chr1	11650000	163830000	1070320000	163830000	ENSG00000205269	ENSG00000143228	ENSG00000205269_ENSG00000143228	ENSG00000143228_ENSG00000205269	TMEM170B	NUF2	11560636	163311170	89364	518830	2.65801	Inf	3	1
106738	16721	chr6	chr1	11650000	167700000	1070320000	167700000	ENSG00000205269	ENSG00000198771	ENSG00000205269_ENSG00000198771	ENSG00000198771_ENSG00000205269	TMEM170B	RCSD1	11560636	167669394	89364	30606	2.65801	Inf	3	1
106738	17056	chr6	chr1	11650000	171050000	1070320000	171050000	ENSG00000205269	ENSG00000117501	ENSG00000205269_ENSG00000117501	ENSG00000117501_ENSG00000205269	TMEM170B	MROH9	11560636	171000118	89364	49882	2.65801	Inf	3	1
106738	17058	chr6	chr1	11650000	171070000	1070320000	171070000	ENSG00000205269	ENSG00000007933	ENSG00000205269_ENSG00000007933	ENSG00000007933_ENSG00000205269	TMEM170B	FMO3	11560636	171104360	89364	-34360	2.65801	Inf	3	1
106738	21854	chr6	chr1	11650000	219030000	1070320000	219030000	ENSG00000205269	ENSG00000143353	ENSG00000205269_ENSG00000143353	ENSG00000143353_ENSG00000205269	TMEM170B	LYPLAL1	11560636	219193367	89364	-163367	2.65801	Inf	3	1
106738	25228	chr6	chr2	11650000	4810000	1070320000	253260000	ENSG00000205269	ENSG00000176887	ENSG00000205269_ENSG00000176887	ENSG00000176887_ENSG00000205269	TMEM170B	SOX11	11560636	5696884	89364	-886884	2.65801	Inf	3	1
106738	50034	chr6	chr3	11650000	11670000	1070320000	501810000	ENSG00000205269	ENSG00000144560	ENSG00000205269_ENSG00000144560	ENSG00000144560_ENSG00000205269	TMEM170B	VGLL4	11560636	11663710	89364	6290	2.65801	Inf	3	1
106738	50058	chr6	chr3	11650000	11910000	1070320000	502050000	ENSG00000205269	ENSG00000144559	ENSG00000205269_ENSG00000144559	ENSG00000144559_ENSG00000205269	TMEM170B	TAMM41	11560636	11818680	89364	91320	2.65801	Inf	3	1
106738	51748	chr6	chr3	11650000	28810000	1070320000	518950000	ENSG00000205269	ENSG00000283563	ENSG00000205269_ENSG00000283563	ENSG00000283563_ENSG00000205269	TMEM170B	AC098650.1	11560636	29058358	89364	-248358	2.65801	Inf	3	1
106738	52175	chr6	chr3	11650000	33080000	1070320000	523220000	ENSG00000205269	ENSG00000188167	ENSG00000205269_ENSG00000188167	ENSG00000188167_ENSG00000205269	TMEM170B	TMPPE	11560636	33093784	89364	-13784	2.65801	Inf	3	1
106738	63247	chr6	chr3	11650000	143800000	1070320000	633940000	ENSG00000205269	ENSG00000181744	ENSG00000205269_ENSG00000181744	ENSG00000181744_ENSG00000205269	TMEM170B	DIPK2A	11560636	144010258	89364	-210258	2.65801	Inf	3	1
106738	68051	chr6	chr3	11650000	191840000	1070320000	681980000	ENSG00000205269	ENSG00000253548	ENSG00000205269_ENSG00000253548	ENSG00000253548_ENSG00000205269	TMEM170B	PYDC2	11560636	191461310	89364	378690	2.65801	Inf	3	1
106738	71844	chr6	chr4	11650000	32470000	1070320000	720400000	ENSG00000205269	ENSG00000169851	ENSG00000205269_ENSG00000169851	ENSG00000169851_ENSG00000205269	TMEM170B	PCDH7	11560636	30933610	89364	1536390	2.65801	Inf	3	1
106738	86574	chr6	chr4	11650000	179770000	1070320000	867700000	ENSG00000205269	ENSG00000038002	ENSG00000205269_ENSG00000038002	ENSG00000038002_ENSG00000205269	TMEM170B	AGA	11560636	177436606	89364	2333394	2.65801	Inf	3	1
106738	89134	chr6	chr5	11650000	16150000	1070320000	893790000	ENSG00000205269	ENSG00000183654	ENSG00000205269_ENSG00000183654	ENSG00000183654_ENSG00000205269	TMEM170B	2021-03-11	11560636	16123950	89364	26050	2.65801	Inf	3	1
106738	89828	chr6	chr5	11650000	23090000	1070320000	900730000	ENSG00000205269	ENSG00000164256	ENSG00000205269_ENSG00000164256	ENSG00000164256_ENSG00000205269	TMEM170B	PRDM9	11560636	23486092	89364	-396092	2.65801	Inf	3	1
106738	101840	chr6	chr5	11650000	143210000	1070320000	1020850000	ENSG00000205269	ENSG00000113580	ENSG00000205269_ENSG00000113580	ENSG00000113580_ENSG00000205269	TMEM170B	NR3C1	11560636	143356722	89364	-146722	2.65801	Inf	3	1
106747	4647	chr6	chr1	11740000	46960000	1070410000	46960000	ENSG00000111863	ENSG00000187048	ENSG00000111863_ENSG00000187048	ENSG00000187048_ENSG00000111863	ADTRP	CYP4A11	11759550	46935330	-19550	24670	2.65801	Inf	3	1
106747	16334	chr6	chr1	11740000	163830000	1070410000	163830000	ENSG00000111863	ENSG00000143228	ENSG00000111863_ENSG00000143228	ENSG00000143228_ENSG00000111863	ADTRP	NUF2	11759550	163311170	-19550	518830	2.65801	Inf	3	1
106747	16721	chr6	chr1	11740000	167700000	1070410000	167700000	ENSG00000111863	ENSG00000198771	ENSG00000111863_ENSG00000198771	ENSG00000198771_ENSG00000111863	ADTRP	RCSD1	11759550	167669394	-19550	30606	2.65801	Inf	3	1
106747	17056	chr6	chr1	11740000	171050000	1070410000	171050000	ENSG00000111863	ENSG00000117501	ENSG00000111863_ENSG00000117501	ENSG00000117501_ENSG00000111863	ADTRP	MROH9	11759550	171000118	-19550	49882	2.65801	Inf	3	1
106747	17058	chr6	chr1	11740000	171070000	1070410000	171070000	ENSG00000111863	ENSG00000007933	ENSG00000111863_ENSG00000007933	ENSG00000007933_ENSG00000111863	ADTRP	FMO3	11759550	171104360	-19550	-34360	2.65801	Inf	3	1
106747	21854	chr6	chr1	11740000	219030000	1070410000	219030000	ENSG00000111863	ENSG00000143353	ENSG00000111863_ENSG00000143353	ENSG00000143353_ENSG00000111863	ADTRP	LYPLAL1	11759550	219193367	-19550	-163367	2.65801	Inf	3	1
106747	25228	chr6	chr2	11740000	4810000	1070410000	253260000	ENSG00000111863	ENSG00000176887	ENSG00000111863_ENSG00000176887	ENSG00000176887_ENSG00000111863	ADTRP	SOX11	11759550	5696884	-19550	-886884	2.65801	Inf	3	1
106747	50034	chr6	chr3	11740000	11670000	1070410000	501810000	ENSG00000111863	ENSG00000144560	ENSG00000111863_ENSG00000144560	ENSG00000144560_ENSG00000111863	ADTRP	VGLL4	11759550	11663710	-19550	6290	2.65801	Inf	3	1
106747	50058	chr6	chr3	11740000	11910000	1070410000	502050000	ENSG00000111863	ENSG00000144559	ENSG00000111863_ENSG00000144559	ENSG00000144559_ENSG00000111863	ADTRP	TAMM41	11759550	11818680	-19550	91320	2.65801	Inf	3	1
106747	51748	chr6	chr3	11740000	28810000	1070410000	518950000	ENSG00000111863	ENSG00000283563	ENSG00000111863_ENSG00000283563	ENSG00000283563_ENSG00000111863	ADTRP	AC098650.1	11759550	29058358	-19550	-248358	2.65801	Inf	3	1
106747	52175	chr6	chr3	11740000	33080000	1070410000	523220000	ENSG00000111863	ENSG00000188167	ENSG00000111863_ENSG00000188167	ENSG00000188167_ENSG00000111863	ADTRP	TMPPE	11759550	33093784	-19550	-13784	2.65801	Inf	3	1
106747	63247	chr6	chr3	11740000	143800000	1070410000	633940000	ENSG00000111863	ENSG00000181744	ENSG00000111863_ENSG00000181744	ENSG00000181744_ENSG00000111863	ADTRP	DIPK2A	11759550	144010258	-19550	-210258	2.65801	Inf	3	1
106747	68051	chr6	chr3	11740000	191840000	1070410000	681980000	ENSG00000111863	ENSG00000253548	ENSG00000111863_ENSG00000253548	ENSG00000253548_ENSG00000111863	ADTRP	PYDC2	11759550	191461310	-19550	378690	2.65801	Inf	3	1
106747	71844	chr6	chr4	11740000	32470000	1070410000	720400000	ENSG00000111863	ENSG00000169851	ENSG00000111863_ENSG00000169851	ENSG00000169851_ENSG00000111863	ADTRP	PCDH7	11759550	30933610	-19550	1536390	2.65801	Inf	3	1
106747	86574	chr6	chr4	11740000	179770000	1070410000	867700000	ENSG00000111863	ENSG00000038002	ENSG00000111863_ENSG00000038002	ENSG00000038002_ENSG00000111863	ADTRP	AGA	11759550	177436606	-19550	2333394	2.65801	Inf	3	1
106747	89134	chr6	chr5	11740000	16150000	1070410000	893790000	ENSG00000111863	ENSG00000183654	ENSG00000111863_ENSG00000183654	ENSG00000183654_ENSG00000111863	ADTRP	2021-03-11	11759550	16123950	-19550	26050	2.65801	Inf	3	1
106747	89828	chr6	chr5	11740000	23090000	1070410000	900730000	ENSG00000111863	ENSG00000164256	ENSG00000111863_ENSG00000164256	ENSG00000164256_ENSG00000111863	ADTRP	PRDM9	11759550	23486092	-19550	-396092	2.65801	Inf	3	1
106747	101840	chr6	chr5	11740000	143210000	1070410000	1020850000	ENSG00000111863	ENSG00000113580	ENSG00000111863_ENSG00000113580	ENSG00000113580_ENSG00000111863	ADTRP	NR3C1	11759550	143356722	-19550	-146722	2.65801	Inf	3	1
108346	51451	chr6	chr3	27730000	25840000	1086400000	515980000	ENSG00000185130	ENSG00000151093	ENSG00000185130_ENSG00000151093	ENSG00000151093_ENSG00000185130	HIST1H2BL	OXSM	27807688	25788726	-77688	51274	3.13513	Inf	4	0
109175	108214	chr6	chr6	36020000	26410000	1094690000	1085080000	ENSG00000112053	ENSG00000026950	ENSG00000112053_ENSG00000026950	ENSG00000026950_ENSG00000112053	SLC26A8	BTN3A1	35984191	26408722	35809	1278	3.47756	Inf	5	0
109949	104211	chr6	chr5	43760000	166920000	1102430000	1044560000	ENSG00000112715	ENSG00000145934	ENSG00000112715_ENSG00000145934	ENSG00000145934_ENSG00000112715	VEGFA	TENM2	43778336	167774478	-18336	-854478	3.13513	Inf	4	0
113772	74146	chr6	chr4	81990000	55490000	1140660000	743420000	ENSG00000005700	ENSG00000134852	ENSG00000005700_ENSG00000134852	ENSG00000134852_ENSG00000005700	IBTK	CLOCK	82208870	55487406	-218870	2594	3.13513	Inf	4	0
117724	32891	chr6	chr2	121510000	81440000	1180180000	329890000	ENSG00000152661	ENSG00000162951	ENSG00000152661_ENSG00000162951	ENSG00000162951_ENSG00000152661	GJA1	LRRTM1	121442661	80296552	67339	1143448	3.13513	Inf	4	0
117724	56563	chr6	chr3	121510000	76960000	1180180000	567100000	ENSG00000152661	ENSG00000185008	ENSG00000152661_ENSG00000185008	ENSG00000185008_ENSG00000152661	GJA1	ROBO2	121442661	76778330	67339	181670	3.13513	Inf	4	0
120362	4647	chr6	chr1	147890000	46960000	1206560000	46960000	ENSG00000203727	ENSG00000187048	ENSG00000203727_ENSG00000187048	ENSG00000187048_ENSG00000203727	SAMD5	CYP4A11	147623118	46935330	266882	24670	2.65801	Inf	3	1
120362	16334	chr6	chr1	147890000	163830000	1206560000	163830000	ENSG00000203727	ENSG00000143228	ENSG00000203727_ENSG00000143228	ENSG00000143228_ENSG00000203727	SAMD5	NUF2	147623118	163311170	266882	518830	2.65801	Inf	3	1
120362	16721	chr6	chr1	147890000	167700000	1206560000	167700000	ENSG00000203727	ENSG00000198771	ENSG00000203727_ENSG00000198771	ENSG00000198771_ENSG00000203727	SAMD5	RCSD1	147623118	167669394	266882	30606	2.65801	Inf	3	1
120362	17056	chr6	chr1	147890000	171050000	1206560000	171050000	ENSG00000203727	ENSG00000117501	ENSG00000203727_ENSG00000117501	ENSG00000117501_ENSG00000203727	SAMD5	MROH9	147623118	171000118	266882	49882	2.65801	Inf	3	1
120362	17058	chr6	chr1	147890000	171070000	1206560000	171070000	ENSG00000203727	ENSG00000007933	ENSG00000203727_ENSG00000007933	ENSG00000007933_ENSG00000203727	SAMD5	FMO3	147623118	171104360	266882	-34360	2.65801	Inf	3	1
120362	21854	chr6	chr1	147890000	219030000	1206560000	219030000	ENSG00000203727	ENSG00000143353	ENSG00000203727_ENSG00000143353	ENSG00000143353_ENSG00000203727	SAMD5	LYPLAL1	147623118	219193367	266882	-163367	2.65801	Inf	3	1
120362	25228	chr6	chr2	147890000	4810000	1206560000	253260000	ENSG00000203727	ENSG00000176887	ENSG00000203727_ENSG00000176887	ENSG00000176887_ENSG00000203727	SAMD5	SOX11	147623118	5696884	266882	-886884	2.65801	Inf	3	1
120362	50034	chr6	chr3	147890000	11670000	1206560000	501810000	ENSG00000203727	ENSG00000144560	ENSG00000203727_ENSG00000144560	ENSG00000144560_ENSG00000203727	SAMD5	VGLL4	147623118	11663710	266882	6290	2.65801	Inf	3	1
120362	50058	chr6	chr3	147890000	11910000	1206560000	502050000	ENSG00000203727	ENSG00000144559	ENSG00000203727_ENSG00000144559	ENSG00000144559_ENSG00000203727	SAMD5	TAMM41	147623118	11818680	266882	91320	2.65801	Inf	3	1
120362	51748	chr6	chr3	147890000	28810000	1206560000	518950000	ENSG00000203727	ENSG00000283563	ENSG00000203727_ENSG00000283563	ENSG00000283563_ENSG00000203727	SAMD5	AC098650.1	147623118	29058358	266882	-248358	2.65801	Inf	3	1
120362	52175	chr6	chr3	147890000	33080000	1206560000	523220000	ENSG00000203727	ENSG00000188167	ENSG00000203727_ENSG00000188167	ENSG00000188167_ENSG00000203727	SAMD5	TMPPE	147623118	33093784	266882	-13784	2.65801	Inf	3	1
120362	63247	chr6	chr3	147890000	143800000	1206560000	633940000	ENSG00000203727	ENSG00000181744	ENSG00000203727_ENSG00000181744	ENSG00000181744_ENSG00000203727	SAMD5	DIPK2A	147623118	144010258	266882	-210258	2.65801	Inf	3	1
120362	68051	chr6	chr3	147890000	191840000	1206560000	681980000	ENSG00000203727	ENSG00000253548	ENSG00000203727_ENSG00000253548	ENSG00000253548_ENSG00000203727	SAMD5	PYDC2	147623118	191461310	266882	378690	2.65801	Inf	3	1
120362	71844	chr6	chr4	147890000	32470000	1206560000	720400000	ENSG00000203727	ENSG00000169851	ENSG00000203727_ENSG00000169851	ENSG00000169851_ENSG00000203727	SAMD5	PCDH7	147623118	30933610	266882	1536390	2.65801	Inf	3	1
120362	86574	chr6	chr4	147890000	179770000	1206560000	867700000	ENSG00000203727	ENSG00000038002	ENSG00000203727_ENSG00000038002	ENSG00000038002_ENSG00000203727	SAMD5	AGA	147623118	177436606	266882	2333394	2.65801	Inf	3	1
120362	89134	chr6	chr5	147890000	16150000	1206560000	893790000	ENSG00000203727	ENSG00000183654	ENSG00000203727_ENSG00000183654	ENSG00000183654_ENSG00000203727	SAMD5	2021-03-11	147623118	16123950	266882	26050	2.65801	Inf	3	1
120362	89828	chr6	chr5	147890000	23090000	1206560000	900730000	ENSG00000203727	ENSG00000164256	ENSG00000203727_ENSG00000164256	ENSG00000164256_ENSG00000203727	SAMD5	PRDM9	147623118	23486092	266882	-396092	2.65801	Inf	3	1
120362	101840	chr6	chr5	147890000	143210000	1206560000	1020850000	ENSG00000203727	ENSG00000113580	ENSG00000203727_ENSG00000113580	ENSG00000113580_ENSG00000203727	SAMD5	NR3C1	147623118	143356722	266882	-146722	2.65801	Inf	3	1
120362	106738	chr6	chr6	147890000	11650000	1206560000	1070320000	ENSG00000203727	ENSG00000205269	ENSG00000203727_ENSG00000205269	ENSG00000205269_ENSG00000203727	SAMD5	TMEM170B	147623118	11560636	266882	89364	2.65801	Inf	3	1
120362	106747	chr6	chr6	147890000	11740000	1206560000	1070410000	ENSG00000203727	ENSG00000111863	ENSG00000203727_ENSG00000111863	ENSG00000111863_ENSG00000203727	SAMD5	ADTRP	147623118	11759550	266882	-19550	2.65801	Inf	3	1
121670	108214	chr6	chr6	160970000	26410000	1219640000	1085080000	ENSG00000085511	ENSG00000026950	ENSG00000085511_ENSG00000026950	ENSG00000026950_ENSG00000085511	MAP3K4	BTN3A1	161054556	26408722	-84556	1278	3.47756	Inf	5	0
121670	109175	chr6	chr6	160970000	36020000	1219640000	1094690000	ENSG00000085511	ENSG00000112053	ENSG00000085511_ENSG00000112053	ENSG00000112053_ENSG00000085511	MAP3K4	SLC26A8	161054556	35984191	-84556	35809	3.47756	Inf	5	0
121945	2962	chr6	chr1	163720000	30110000	1222390000	30110000	ENSG00000112531	ENSG00000162510	ENSG00000112531_ENSG00000162510	ENSG00000162510_ENSG00000112531	QKI	MATN1	163496296	30717431	223704	-607431	3.13513	Inf	4	2
121945	4506	chr6	chr1	163720000	45550000	1222390000	45550000	ENSG00000112531	ENSG00000117448	ENSG00000112531_ENSG00000117448	ENSG00000117448_ENSG00000112531	QKI	AKR1A1	163496296	45560296	223704	-10296	3.13513	Inf	4	2
121945	5484	chr6	chr1	163720000	55330000	1222390000	55330000	ENSG00000112531	ENSG00000162402	ENSG00000112531_ENSG00000162402	ENSG00000162402_ENSG00000112531	QKI	USP24	163496296	55140862	223704	189138	3.13513	Inf	4	2
121945	15328	chr6	chr1	163720000	153770000	1222390000	153770000	ENSG00000112531	ENSG00000143554	ENSG00000112531_ENSG00000143554	ENSG00000143554_ENSG00000112531	QKI	SLC27A3	163496296	153777256	223704	-7256	3.13513	Inf	4	2
121945	34736	chr6	chr2	163720000	99890000	1222390000	348340000	ENSG00000112531	ENSG00000144218	ENSG00000112531_ENSG00000144218	ENSG00000144218_ENSG00000112531	QKI	AFF3	163496296	99844079	223704	45921	3.13513	Inf	4	2
121945	35141	chr6	chr2	163720000	103940000	1222390000	352390000	ENSG00000112531	ENSG00000198914	ENSG00000112531_ENSG00000198914	ENSG00000198914_ENSG00000112531	QKI	POU3F3	163496296	104857042	223704	-917042	3.13513	Inf	4	2
121945	39264	chr6	chr2	163720000	145170000	1222390000	393620000	ENSG00000112531	ENSG00000169554	ENSG00000112531_ENSG00000169554	ENSG00000169554_ENSG00000112531	QKI	ZEB2	163496296	144442710	223704	727290	3.13513	Inf	4	2
121945	71577	chr6	chr4	163720000	29800000	1222390000	717730000	ENSG00000112531	ENSG00000169851	ENSG00000112531_ENSG00000169851	ENSG00000169851_ENSG00000112531	QKI	PCDH7	163496296	30933610	223704	-1133610	3.13513	Inf	4	0
121945	78926	chr6	chr4	163720000	103290000	1222390000	791220000	ENSG00000112531	ENSG00000138778	ENSG00000112531_ENSG00000138778	ENSG00000138778_ENSG00000112531	QKI	CENPE	163496296	103152108	223704	137892	3.13513	Inf	4	2
121945	86737	chr6	chr4	163720000	181400000	1222390000	869330000	ENSG00000112531	ENSG00000218336	ENSG00000112531_ENSG00000218336	ENSG00000218336_ENSG00000112531	QKI	TENM3	163496296	182473506	223704	-1073506	3.13513	Inf	4	2
123939	4647	chr7	chr1	13850000	46960000	1242820000	46960000	ENSG00000006468	ENSG00000187048	ENSG00000006468_ENSG00000187048	ENSG00000187048_ENSG00000006468	ETV1	CYP4A11	13941327	46935330	-91327	24670	2.65801	Inf	3	1
123939	16334	chr7	chr1	13850000	163830000	1242820000	163830000	ENSG00000006468	ENSG00000143228	ENSG00000006468_ENSG00000143228	ENSG00000143228_ENSG00000006468	ETV1	NUF2	13941327	163311170	-91327	518830	2.65801	Inf	3	1
123939	16721	chr7	chr1	13850000	167700000	1242820000	167700000	ENSG00000006468	ENSG00000198771	ENSG00000006468_ENSG00000198771	ENSG00000198771_ENSG00000006468	ETV1	RCSD1	13941327	167669394	-91327	30606	2.65801	Inf	3	1
123939	17056	chr7	chr1	13850000	171050000	1242820000	171050000	ENSG00000006468	ENSG00000117501	ENSG00000006468_ENSG00000117501	ENSG00000117501_ENSG00000006468	ETV1	MROH9	13941327	171000118	-91327	49882	2.65801	Inf	3	1
123939	17058	chr7	chr1	13850000	171070000	1242820000	171070000	ENSG00000006468	ENSG00000007933	ENSG00000006468_ENSG00000007933	ENSG00000007933_ENSG00000006468	ETV1	FMO3	13941327	171104360	-91327	-34360	2.65801	Inf	3	1
123939	21854	chr7	chr1	13850000	219030000	1242820000	219030000	ENSG00000006468	ENSG00000143353	ENSG00000006468_ENSG00000143353	ENSG00000143353_ENSG00000006468	ETV1	LYPLAL1	13941327	219193367	-91327	-163367	2.65801	Inf	3	1
123939	25228	chr7	chr2	13850000	4810000	1242820000	253260000	ENSG00000006468	ENSG00000176887	ENSG00000006468_ENSG00000176887	ENSG00000176887_ENSG00000006468	ETV1	SOX11	13941327	5696884	-91327	-886884	2.65801	Inf	3	1
123939	50034	chr7	chr3	13850000	11670000	1242820000	501810000	ENSG00000006468	ENSG00000144560	ENSG00000006468_ENSG00000144560	ENSG00000144560_ENSG00000006468	ETV1	VGLL4	13941327	11663710	-91327	6290	2.65801	Inf	3	1
123939	50058	chr7	chr3	13850000	11910000	1242820000	502050000	ENSG00000006468	ENSG00000144559	ENSG00000006468_ENSG00000144559	ENSG00000144559_ENSG00000006468	ETV1	TAMM41	13941327	11818680	-91327	91320	2.65801	Inf	3	1
123939	51748	chr7	chr3	13850000	28810000	1242820000	518950000	ENSG00000006468	ENSG00000283563	ENSG00000006468_ENSG00000283563	ENSG00000283563_ENSG00000006468	ETV1	AC098650.1	13941327	29058358	-91327	-248358	2.65801	Inf	3	1
123939	52175	chr7	chr3	13850000	33080000	1242820000	523220000	ENSG00000006468	ENSG00000188167	ENSG00000006468_ENSG00000188167	ENSG00000188167_ENSG00000006468	ETV1	TMPPE	13941327	33093784	-91327	-13784	2.65801	Inf	3	1
123939	63247	chr7	chr3	13850000	143800000	1242820000	633940000	ENSG00000006468	ENSG00000181744	ENSG00000006468_ENSG00000181744	ENSG00000181744_ENSG00000006468	ETV1	DIPK2A	13941327	144010258	-91327	-210258	2.65801	Inf	3	1
123939	68051	chr7	chr3	13850000	191840000	1242820000	681980000	ENSG00000006468	ENSG00000253548	ENSG00000006468_ENSG00000253548	ENSG00000253548_ENSG00000006468	ETV1	PYDC2	13941327	191461310	-91327	378690	2.65801	Inf	3	1
123939	71844	chr7	chr4	13850000	32470000	1242820000	720400000	ENSG00000006468	ENSG00000169851	ENSG00000006468_ENSG00000169851	ENSG00000169851_ENSG00000006468	ETV1	PCDH7	13941327	30933610	-91327	1536390	2.65801	Inf	3	1
123939	86574	chr7	chr4	13850000	179770000	1242820000	867700000	ENSG00000006468	ENSG00000038002	ENSG00000006468_ENSG00000038002	ENSG00000038002_ENSG00000006468	ETV1	AGA	13941327	177436606	-91327	2333394	2.65801	Inf	3	1
123939	89134	chr7	chr5	13850000	16150000	1242820000	893790000	ENSG00000006468	ENSG00000183654	ENSG00000006468_ENSG00000183654	ENSG00000183654_ENSG00000006468	ETV1	2021-03-11	13941327	16123950	-91327	26050	2.65801	Inf	3	1
123939	89828	chr7	chr5	13850000	23090000	1242820000	900730000	ENSG00000006468	ENSG00000164256	ENSG00000006468_ENSG00000164256	ENSG00000164256_ENSG00000006468	ETV1	PRDM9	13941327	23486092	-91327	-396092	2.65801	Inf	3	1
123939	101840	chr7	chr5	13850000	143210000	1242820000	1020850000	ENSG00000006468	ENSG00000113580	ENSG00000006468_ENSG00000113580	ENSG00000113580_ENSG00000006468	ETV1	NR3C1	13941327	143356722	-91327	-146722	2.65801	Inf	3	1
123939	106738	chr7	chr6	13850000	11650000	1242820000	1070320000	ENSG00000006468	ENSG00000205269	ENSG00000006468_ENSG00000205269	ENSG00000205269_ENSG00000006468	ETV1	TMEM170B	13941327	11560636	-91327	89364	2.65801	Inf	3	1
123939	106747	chr7	chr6	13850000	11740000	1242820000	1070410000	ENSG00000006468	ENSG00000111863	ENSG00000006468_ENSG00000111863	ENSG00000111863_ENSG00000006468	ETV1	ADTRP	13941327	11759550	-91327	-19550	2.65801	Inf	3	1
123939	120362	chr7	chr6	13850000	147890000	1242820000	1206560000	ENSG00000006468	ENSG00000203727	ENSG00000006468_ENSG00000203727	ENSG00000203727_ENSG00000006468	ETV1	SAMD5	13941327	147623118	-91327	266882	2.65801	Inf	3	1
130108	35246	chr7	chr2	75540000	104990000	1304510000	353440000	ENSG00000170092	ENSG00000135972	ENSG00000170092_ENSG00000135972	ENSG00000135972_ENSG00000170092	SPDYE5	MRPS9	75498964	105069014	41036	-79014	3.13513	Inf	4	0
130108	45509	chr7	chr2	75540000	207620000	1304510000	456070000	ENSG00000170092	ENSG00000144401	ENSG00000170092_ENSG00000144401	ENSG00000144401_ENSG00000170092	SPDYE5	METTL21A	75498964	207603280	41036	16720	3.13513	Inf	4	0
130108	47652	chr7	chr2	75540000	229050000	1304510000	477500000	ENSG00000170092	ENSG00000153823	ENSG00000170092_ENSG00000153823	ENSG00000153823_ENSG00000170092	SPDYE5	PID1	75498964	229060906	41036	-10906	3.13513	Inf	4	0
130492	1264	chr7	chr1	79380000	13130000	1308350000	13130000	ENSG00000127955	ENSG00000275774	ENSG00000127955_ENSG00000275774	ENSG00000275774_ENSG00000127955	GNAI1	HNRNPCL2	79997104	13116175	-617104	13825	2.65801	Inf	3	0
131715	9813	chr7	chr1	91610000	98620000	1320580000	98620000	ENSG00000127989	ENSG00000162627	ENSG00000127989_ENSG00000162627	ENSG00000162627_ENSG00000127989	MTERF1	SNX7	91786364	98711100	-176364	-91100	3.13513	Inf	4	3
131715	38953	chr7	chr2	91610000	142060000	1320580000	390510000	ENSG00000127989	ENSG00000168702	ENSG00000127989_ENSG00000168702	ENSG00000168702_ENSG00000127989	MTERF1	LRP1B	91786364	141181562	-176364	878438	3.13513	Inf	4	3
131715	56142	chr7	chr3	91610000	72750000	1320580000	562890000	ENSG00000127989	ENSG00000144736	ENSG00000127989_ENSG00000144736	ENSG00000144736_ENSG00000127989	MTERF1	SHQ1	91786364	72805596	-176364	-55596	3.13513	Inf	4	3
132908	4647	chr7	chr1	103540000	46960000	1332510000	46960000	ENSG00000170615	ENSG00000187048	ENSG00000170615_ENSG00000187048	ENSG00000187048_ENSG00000170615	SLC26A5	CYP4A11	103399454	46935330	140546	24670	2.65801	Inf	3	1
132908	16334	chr7	chr1	103540000	163830000	1332510000	163830000	ENSG00000170615	ENSG00000143228	ENSG00000170615_ENSG00000143228	ENSG00000143228_ENSG00000170615	SLC26A5	NUF2	103399454	163311170	140546	518830	2.65801	Inf	3	1
132908	16721	chr7	chr1	103540000	167700000	1332510000	167700000	ENSG00000170615	ENSG00000198771	ENSG00000170615_ENSG00000198771	ENSG00000198771_ENSG00000170615	SLC26A5	RCSD1	103399454	167669394	140546	30606	2.65801	Inf	3	1
132908	17056	chr7	chr1	103540000	171050000	1332510000	171050000	ENSG00000170615	ENSG00000117501	ENSG00000170615_ENSG00000117501	ENSG00000117501_ENSG00000170615	SLC26A5	MROH9	103399454	171000118	140546	49882	2.65801	Inf	3	1
132908	17058	chr7	chr1	103540000	171070000	1332510000	171070000	ENSG00000170615	ENSG00000007933	ENSG00000170615_ENSG00000007933	ENSG00000007933_ENSG00000170615	SLC26A5	FMO3	103399454	171104360	140546	-34360	2.65801	Inf	3	1
132908	21854	chr7	chr1	103540000	219030000	1332510000	219030000	ENSG00000170615	ENSG00000143353	ENSG00000170615_ENSG00000143353	ENSG00000143353_ENSG00000170615	SLC26A5	LYPLAL1	103399454	219193367	140546	-163367	2.65801	Inf	3	1
132908	25228	chr7	chr2	103540000	4810000	1332510000	253260000	ENSG00000170615	ENSG00000176887	ENSG00000170615_ENSG00000176887	ENSG00000176887_ENSG00000170615	SLC26A5	SOX11	103399454	5696884	140546	-886884	2.65801	Inf	3	1
132908	50034	chr7	chr3	103540000	11670000	1332510000	501810000	ENSG00000170615	ENSG00000144560	ENSG00000170615_ENSG00000144560	ENSG00000144560_ENSG00000170615	SLC26A5	VGLL4	103399454	11663710	140546	6290	2.65801	Inf	3	1
132908	50058	chr7	chr3	103540000	11910000	1332510000	502050000	ENSG00000170615	ENSG00000144559	ENSG00000170615_ENSG00000144559	ENSG00000144559_ENSG00000170615	SLC26A5	TAMM41	103399454	11818680	140546	91320	2.65801	Inf	3	1
132908	51748	chr7	chr3	103540000	28810000	1332510000	518950000	ENSG00000170615	ENSG00000283563	ENSG00000170615_ENSG00000283563	ENSG00000283563_ENSG00000170615	SLC26A5	AC098650.1	103399454	29058358	140546	-248358	2.65801	Inf	3	1
132908	52175	chr7	chr3	103540000	33080000	1332510000	523220000	ENSG00000170615	ENSG00000188167	ENSG00000170615_ENSG00000188167	ENSG00000188167_ENSG00000170615	SLC26A5	TMPPE	103399454	33093784	140546	-13784	2.65801	Inf	3	1
132908	63247	chr7	chr3	103540000	143800000	1332510000	633940000	ENSG00000170615	ENSG00000181744	ENSG00000170615_ENSG00000181744	ENSG00000181744_ENSG00000170615	SLC26A5	DIPK2A	103399454	144010258	140546	-210258	2.65801	Inf	3	1
132908	68051	chr7	chr3	103540000	191840000	1332510000	681980000	ENSG00000170615	ENSG00000253548	ENSG00000170615_ENSG00000253548	ENSG00000253548_ENSG00000170615	SLC26A5	PYDC2	103399454	191461310	140546	378690	2.65801	Inf	3	1
132908	71844	chr7	chr4	103540000	32470000	1332510000	720400000	ENSG00000170615	ENSG00000169851	ENSG00000170615_ENSG00000169851	ENSG00000169851_ENSG00000170615	SLC26A5	PCDH7	103399454	30933610	140546	1536390	2.65801	Inf	3	1
132908	86574	chr7	chr4	103540000	179770000	1332510000	867700000	ENSG00000170615	ENSG00000038002	ENSG00000170615_ENSG00000038002	ENSG00000038002_ENSG00000170615	SLC26A5	AGA	103399454	177436606	140546	2333394	2.65801	Inf	3	1
132908	89134	chr7	chr5	103540000	16150000	1332510000	893790000	ENSG00000170615	ENSG00000183654	ENSG00000170615_ENSG00000183654	ENSG00000183654_ENSG00000170615	SLC26A5	2021-03-11	103399454	16123950	140546	26050	2.65801	Inf	3	1
132908	89828	chr7	chr5	103540000	23090000	1332510000	900730000	ENSG00000170615	ENSG00000164256	ENSG00000170615_ENSG00000164256	ENSG00000164256_ENSG00000170615	SLC26A5	PRDM9	103399454	23486092	140546	-396092	2.65801	Inf	3	1
132908	101840	chr7	chr5	103540000	143210000	1332510000	1020850000	ENSG00000170615	ENSG00000113580	ENSG00000170615_ENSG00000113580	ENSG00000113580_ENSG00000170615	SLC26A5	NR3C1	103399454	143356722	140546	-146722	2.65801	Inf	3	1
132908	106738	chr7	chr6	103540000	11650000	1332510000	1070320000	ENSG00000170615	ENSG00000205269	ENSG00000170615_ENSG00000205269	ENSG00000205269_ENSG00000170615	SLC26A5	TMEM170B	103399454	11560636	140546	89364	2.65801	Inf	3	1
132908	106747	chr7	chr6	103540000	11740000	1332510000	1070410000	ENSG00000170615	ENSG00000111863	ENSG00000170615_ENSG00000111863	ENSG00000111863_ENSG00000170615	SLC26A5	ADTRP	103399454	11759550	140546	-19550	2.65801	Inf	3	1
132908	120362	chr7	chr6	103540000	147890000	1332510000	1206560000	ENSG00000170615	ENSG00000203727	ENSG00000170615_ENSG00000203727	ENSG00000203727_ENSG00000170615	SLC26A5	SAMD5	103399454	147623118	140546	266882	2.65801	Inf	3	1
132908	123939	chr7	chr7	103540000	13850000	1332510000	1242820000	ENSG00000170615	ENSG00000006468	ENSG00000170615_ENSG00000006468	ENSG00000006468_ENSG00000170615	SLC26A5	ETV1	103399454	13941327	140546	-91327	2.65801	Inf	3	1
133076	5475	chr7	chr1	105220000	55240000	1334190000	55240000	ENSG00000135250	ENSG00000162402	ENSG00000135250_ENSG00000162402	ENSG00000162402_ENSG00000135250	SRPK2	USP24	105255006	55140862	-35006	99138	3.47756	Inf	5	0
133076	21260	chr7	chr1	105220000	213090000	1334190000	213090000	ENSG00000135250	ENSG00000136643	ENSG00000135250_ENSG00000136643	ENSG00000136643_ENSG00000135250	SRPK2	RPS6KC1	105255006	213163004	-35006	-73004	3.47756	Inf	5	0
133076	81177	chr7	chr4	105220000	125800000	1334190000	813730000	ENSG00000135250	ENSG00000196159	ENSG00000135250_ENSG00000196159	ENSG00000196159_ENSG00000135250	SRPK2	FAT4	105255006	125404666	-35006	395334	3.47756	Inf	5	0
133076	90043	chr7	chr5	105220000	25240000	1334190000	902880000	ENSG00000135250	ENSG00000040731	ENSG00000135250_ENSG00000040731	ENSG00000040731_ENSG00000135250	SRPK2	CDH10	105255006	24566039	-35006	673961	3.47756	Inf	5	0
133680	4647	chr7	chr1	111260000	46960000	1340230000	46960000	ENSG00000184903	ENSG00000187048	ENSG00000184903_ENSG00000187048	ENSG00000187048_ENSG00000184903	IMMP2L	CYP4A11	111112784	46935330	147216	24670	2.65801	Inf	3	1
133680	16334	chr7	chr1	111260000	163830000	1340230000	163830000	ENSG00000184903	ENSG00000143228	ENSG00000184903_ENSG00000143228	ENSG00000143228_ENSG00000184903	IMMP2L	NUF2	111112784	163311170	147216	518830	2.65801	Inf	3	1
133680	16721	chr7	chr1	111260000	167700000	1340230000	167700000	ENSG00000184903	ENSG00000198771	ENSG00000184903_ENSG00000198771	ENSG00000198771_ENSG00000184903	IMMP2L	RCSD1	111112784	167669394	147216	30606	2.65801	Inf	3	1
133680	17056	chr7	chr1	111260000	171050000	1340230000	171050000	ENSG00000184903	ENSG00000117501	ENSG00000184903_ENSG00000117501	ENSG00000117501_ENSG00000184903	IMMP2L	MROH9	111112784	171000118	147216	49882	2.65801	Inf	3	1
133680	17058	chr7	chr1	111260000	171070000	1340230000	171070000	ENSG00000184903	ENSG00000007933	ENSG00000184903_ENSG00000007933	ENSG00000007933_ENSG00000184903	IMMP2L	FMO3	111112784	171104360	147216	-34360	2.65801	Inf	3	1
133680	21854	chr7	chr1	111260000	219030000	1340230000	219030000	ENSG00000184903	ENSG00000143353	ENSG00000184903_ENSG00000143353	ENSG00000143353_ENSG00000184903	IMMP2L	LYPLAL1	111112784	219193367	147216	-163367	2.65801	Inf	3	1
133680	25228	chr7	chr2	111260000	4810000	1340230000	253260000	ENSG00000184903	ENSG00000176887	ENSG00000184903_ENSG00000176887	ENSG00000176887_ENSG00000184903	IMMP2L	SOX11	111112784	5696884	147216	-886884	2.65801	Inf	3	1
133680	50034	chr7	chr3	111260000	11670000	1340230000	501810000	ENSG00000184903	ENSG00000144560	ENSG00000184903_ENSG00000144560	ENSG00000144560_ENSG00000184903	IMMP2L	VGLL4	111112784	11663710	147216	6290	2.65801	Inf	3	1
133680	50058	chr7	chr3	111260000	11910000	1340230000	502050000	ENSG00000184903	ENSG00000144559	ENSG00000184903_ENSG00000144559	ENSG00000144559_ENSG00000184903	IMMP2L	TAMM41	111112784	11818680	147216	91320	2.65801	Inf	3	1
133680	51748	chr7	chr3	111260000	28810000	1340230000	518950000	ENSG00000184903	ENSG00000283563	ENSG00000184903_ENSG00000283563	ENSG00000283563_ENSG00000184903	IMMP2L	AC098650.1	111112784	29058358	147216	-248358	2.65801	Inf	3	1
133680	52175	chr7	chr3	111260000	33080000	1340230000	523220000	ENSG00000184903	ENSG00000188167	ENSG00000184903_ENSG00000188167	ENSG00000188167_ENSG00000184903	IMMP2L	TMPPE	111112784	33093784	147216	-13784	2.65801	Inf	3	1
133680	63247	chr7	chr3	111260000	143800000	1340230000	633940000	ENSG00000184903	ENSG00000181744	ENSG00000184903_ENSG00000181744	ENSG00000181744_ENSG00000184903	IMMP2L	DIPK2A	111112784	144010258	147216	-210258	2.65801	Inf	3	1
133680	68051	chr7	chr3	111260000	191840000	1340230000	681980000	ENSG00000184903	ENSG00000253548	ENSG00000184903_ENSG00000253548	ENSG00000253548_ENSG00000184903	IMMP2L	PYDC2	111112784	191461310	147216	378690	2.65801	Inf	3	1
133680	71844	chr7	chr4	111260000	32470000	1340230000	720400000	ENSG00000184903	ENSG00000169851	ENSG00000184903_ENSG00000169851	ENSG00000169851_ENSG00000184903	IMMP2L	PCDH7	111112784	30933610	147216	1536390	2.65801	Inf	3	1
133680	86574	chr7	chr4	111260000	179770000	1340230000	867700000	ENSG00000184903	ENSG00000038002	ENSG00000184903_ENSG00000038002	ENSG00000038002_ENSG00000184903	IMMP2L	AGA	111112784	177436606	147216	2333394	2.65801	Inf	3	1
133680	89134	chr7	chr5	111260000	16150000	1340230000	893790000	ENSG00000184903	ENSG00000183654	ENSG00000184903_ENSG00000183654	ENSG00000183654_ENSG00000184903	IMMP2L	2021-03-11	111112784	16123950	147216	26050	2.65801	Inf	3	1
133680	89828	chr7	chr5	111260000	23090000	1340230000	900730000	ENSG00000184903	ENSG00000164256	ENSG00000184903_ENSG00000164256	ENSG00000164256_ENSG00000184903	IMMP2L	PRDM9	111112784	23486092	147216	-396092	2.65801	Inf	3	1
133680	101840	chr7	chr5	111260000	143210000	1340230000	1020850000	ENSG00000184903	ENSG00000113580	ENSG00000184903_ENSG00000113580	ENSG00000113580_ENSG00000184903	IMMP2L	NR3C1	111112784	143356722	147216	-146722	2.65801	Inf	3	1
133680	106738	chr7	chr6	111260000	11650000	1340230000	1070320000	ENSG00000184903	ENSG00000205269	ENSG00000184903_ENSG00000205269	ENSG00000205269_ENSG00000184903	IMMP2L	TMEM170B	111112784	11560636	147216	89364	2.65801	Inf	3	1
133680	106747	chr7	chr6	111260000	11740000	1340230000	1070410000	ENSG00000184903	ENSG00000111863	ENSG00000184903_ENSG00000111863	ENSG00000111863_ENSG00000184903	IMMP2L	ADTRP	111112784	11759550	147216	-19550	2.65801	Inf	3	1
133680	120362	chr7	chr6	111260000	147890000	1340230000	1206560000	ENSG00000184903	ENSG00000203727	ENSG00000184903_ENSG00000203727	ENSG00000203727_ENSG00000184903	IMMP2L	SAMD5	111112784	147623118	147216	266882	2.65801	Inf	3	1
133680	123939	chr7	chr7	111260000	13850000	1340230000	1242820000	ENSG00000184903	ENSG00000006468	ENSG00000184903_ENSG00000006468	ENSG00000006468_ENSG00000184903	IMMP2L	ETV1	111112784	13941327	147216	-91327	2.65801	Inf	3	1
133680	132908	chr7	chr7	111260000	103540000	1340230000	1332510000	ENSG00000184903	ENSG00000170615	ENSG00000184903_ENSG00000170615	ENSG00000170615_ENSG00000184903	IMMP2L	SLC26A5	111112784	103399454	147216	140546	2.65801	Inf	3	1
134157	2962	chr7	chr1	116030000	30110000	1345000000	30110000	ENSG00000105967	ENSG00000162510	ENSG00000105967_ENSG00000162510	ENSG00000162510_ENSG00000105967	TFEC	MATN1	116047522	30717431	-17522	-607431	3.13513	Inf	4	2
134157	4506	chr7	chr1	116030000	45550000	1345000000	45550000	ENSG00000105967	ENSG00000117448	ENSG00000105967_ENSG00000117448	ENSG00000117448_ENSG00000105967	TFEC	AKR1A1	116047522	45560296	-17522	-10296	3.13513	Inf	4	2
134157	5484	chr7	chr1	116030000	55330000	1345000000	55330000	ENSG00000105967	ENSG00000162402	ENSG00000105967_ENSG00000162402	ENSG00000162402_ENSG00000105967	TFEC	USP24	116047522	55140862	-17522	189138	3.13513	Inf	4	2
134157	15328	chr7	chr1	116030000	153770000	1345000000	153770000	ENSG00000105967	ENSG00000143554	ENSG00000105967_ENSG00000143554	ENSG00000143554_ENSG00000105967	TFEC	SLC27A3	116047522	153777256	-17522	-7256	3.13513	Inf	4	2
134157	34736	chr7	chr2	116030000	99890000	1345000000	348340000	ENSG00000105967	ENSG00000144218	ENSG00000105967_ENSG00000144218	ENSG00000144218_ENSG00000105967	TFEC	AFF3	116047522	99844079	-17522	45921	3.13513	Inf	4	2
134157	35141	chr7	chr2	116030000	103940000	1345000000	352390000	ENSG00000105967	ENSG00000198914	ENSG00000105967_ENSG00000198914	ENSG00000198914_ENSG00000105967	TFEC	POU3F3	116047522	104857042	-17522	-917042	3.13513	Inf	4	2
134157	39264	chr7	chr2	116030000	145170000	1345000000	393620000	ENSG00000105967	ENSG00000169554	ENSG00000105967_ENSG00000169554	ENSG00000169554_ENSG00000105967	TFEC	ZEB2	116047522	144442710	-17522	727290	3.13513	Inf	4	2
134157	71577	chr7	chr4	116030000	29800000	1345000000	717730000	ENSG00000105967	ENSG00000169851	ENSG00000105967_ENSG00000169851	ENSG00000169851_ENSG00000105967	TFEC	PCDH7	116047522	30933610	-17522	-1133610	3.13513	Inf	4	0
134157	78926	chr7	chr4	116030000	103290000	1345000000	791220000	ENSG00000105967	ENSG00000138778	ENSG00000105967_ENSG00000138778	ENSG00000138778_ENSG00000105967	TFEC	CENPE	116047522	103152108	-17522	137892	3.13513	Inf	4	2
134157	86737	chr7	chr4	116030000	181400000	1345000000	869330000	ENSG00000105967	ENSG00000218336	ENSG00000105967_ENSG00000218336	ENSG00000218336_ENSG00000105967	TFEC	TENM3	116047522	182473506	-17522	-1073506	3.13513	Inf	4	2
134157	121945	chr7	chr6	116030000	163720000	1345000000	1222390000	ENSG00000105967	ENSG00000112531	ENSG00000105967_ENSG00000112531	ENSG00000112531_ENSG00000105967	TFEC	QKI	116047522	163496296	-17522	223704	3.13513	Inf	4	2
134494	4647	chr7	chr1	119400000	46960000	1348370000	46960000	ENSG00000106013	ENSG00000187048	ENSG00000106013_ENSG00000187048	ENSG00000187048_ENSG00000106013	ANKRD7	CYP4A11	118355420	46935330	1044580	24670	2.65801	Inf	3	1
134494	16334	chr7	chr1	119400000	163830000	1348370000	163830000	ENSG00000106013	ENSG00000143228	ENSG00000106013_ENSG00000143228	ENSG00000143228_ENSG00000106013	ANKRD7	NUF2	118355420	163311170	1044580	518830	2.65801	Inf	3	1
134494	16721	chr7	chr1	119400000	167700000	1348370000	167700000	ENSG00000106013	ENSG00000198771	ENSG00000106013_ENSG00000198771	ENSG00000198771_ENSG00000106013	ANKRD7	RCSD1	118355420	167669394	1044580	30606	2.65801	Inf	3	1
134494	17056	chr7	chr1	119400000	171050000	1348370000	171050000	ENSG00000106013	ENSG00000117501	ENSG00000106013_ENSG00000117501	ENSG00000117501_ENSG00000106013	ANKRD7	MROH9	118355420	171000118	1044580	49882	2.65801	Inf	3	1
134494	17058	chr7	chr1	119400000	171070000	1348370000	171070000	ENSG00000106013	ENSG00000007933	ENSG00000106013_ENSG00000007933	ENSG00000007933_ENSG00000106013	ANKRD7	FMO3	118355420	171104360	1044580	-34360	2.65801	Inf	3	1
134494	21854	chr7	chr1	119400000	219030000	1348370000	219030000	ENSG00000106013	ENSG00000143353	ENSG00000106013_ENSG00000143353	ENSG00000143353_ENSG00000106013	ANKRD7	LYPLAL1	118355420	219193367	1044580	-163367	2.65801	Inf	3	1
134494	25228	chr7	chr2	119400000	4810000	1348370000	253260000	ENSG00000106013	ENSG00000176887	ENSG00000106013_ENSG00000176887	ENSG00000176887_ENSG00000106013	ANKRD7	SOX11	118355420	5696884	1044580	-886884	2.65801	Inf	3	1
134494	50034	chr7	chr3	119400000	11670000	1348370000	501810000	ENSG00000106013	ENSG00000144560	ENSG00000106013_ENSG00000144560	ENSG00000144560_ENSG00000106013	ANKRD7	VGLL4	118355420	11663710	1044580	6290	2.65801	Inf	3	1
134494	50058	chr7	chr3	119400000	11910000	1348370000	502050000	ENSG00000106013	ENSG00000144559	ENSG00000106013_ENSG00000144559	ENSG00000144559_ENSG00000106013	ANKRD7	TAMM41	118355420	11818680	1044580	91320	2.65801	Inf	3	1
134494	51748	chr7	chr3	119400000	28810000	1348370000	518950000	ENSG00000106013	ENSG00000283563	ENSG00000106013_ENSG00000283563	ENSG00000283563_ENSG00000106013	ANKRD7	AC098650.1	118355420	29058358	1044580	-248358	2.65801	Inf	3	1
134494	52175	chr7	chr3	119400000	33080000	1348370000	523220000	ENSG00000106013	ENSG00000188167	ENSG00000106013_ENSG00000188167	ENSG00000188167_ENSG00000106013	ANKRD7	TMPPE	118355420	33093784	1044580	-13784	2.65801	Inf	3	1
134494	63247	chr7	chr3	119400000	143800000	1348370000	633940000	ENSG00000106013	ENSG00000181744	ENSG00000106013_ENSG00000181744	ENSG00000181744_ENSG00000106013	ANKRD7	DIPK2A	118355420	144010258	1044580	-210258	2.65801	Inf	3	1
134494	68051	chr7	chr3	119400000	191840000	1348370000	681980000	ENSG00000106013	ENSG00000253548	ENSG00000106013_ENSG00000253548	ENSG00000253548_ENSG00000106013	ANKRD7	PYDC2	118355420	191461310	1044580	378690	2.65801	Inf	3	1
134494	71844	chr7	chr4	119400000	32470000	1348370000	720400000	ENSG00000106013	ENSG00000169851	ENSG00000106013_ENSG00000169851	ENSG00000169851_ENSG00000106013	ANKRD7	PCDH7	118355420	30933610	1044580	1536390	2.65801	Inf	3	1
134494	86574	chr7	chr4	119400000	179770000	1348370000	867700000	ENSG00000106013	ENSG00000038002	ENSG00000106013_ENSG00000038002	ENSG00000038002_ENSG00000106013	ANKRD7	AGA	118355420	177436606	1044580	2333394	2.65801	Inf	3	1
134494	89134	chr7	chr5	119400000	16150000	1348370000	893790000	ENSG00000106013	ENSG00000183654	ENSG00000106013_ENSG00000183654	ENSG00000183654_ENSG00000106013	ANKRD7	2021-03-11	118355420	16123950	1044580	26050	2.65801	Inf	3	1
134494	89828	chr7	chr5	119400000	23090000	1348370000	900730000	ENSG00000106013	ENSG00000164256	ENSG00000106013_ENSG00000164256	ENSG00000164256_ENSG00000106013	ANKRD7	PRDM9	118355420	23486092	1044580	-396092	2.65801	Inf	3	1
134494	101840	chr7	chr5	119400000	143210000	1348370000	1020850000	ENSG00000106013	ENSG00000113580	ENSG00000106013_ENSG00000113580	ENSG00000113580_ENSG00000106013	ANKRD7	NR3C1	118355420	143356722	1044580	-146722	2.65801	Inf	3	1
134494	106738	chr7	chr6	119400000	11650000	1348370000	1070320000	ENSG00000106013	ENSG00000205269	ENSG00000106013_ENSG00000205269	ENSG00000205269_ENSG00000106013	ANKRD7	TMEM170B	118355420	11560636	1044580	89364	2.65801	Inf	3	1
134494	106747	chr7	chr6	119400000	11740000	1348370000	1070410000	ENSG00000106013	ENSG00000111863	ENSG00000106013_ENSG00000111863	ENSG00000111863_ENSG00000106013	ANKRD7	ADTRP	118355420	11759550	1044580	-19550	2.65801	Inf	3	1
134494	120362	chr7	chr6	119400000	147890000	1348370000	1206560000	ENSG00000106013	ENSG00000203727	ENSG00000106013_ENSG00000203727	ENSG00000203727_ENSG00000106013	ANKRD7	SAMD5	118355420	147623118	1044580	266882	2.65801	Inf	3	1
134494	123939	chr7	chr7	119400000	13850000	1348370000	1242820000	ENSG00000106013	ENSG00000006468	ENSG00000106013_ENSG00000006468	ENSG00000006468_ENSG00000106013	ANKRD7	ETV1	118355420	13941327	1044580	-91327	2.65801	Inf	3	1
134494	132908	chr7	chr7	119400000	103540000	1348370000	1332510000	ENSG00000106013	ENSG00000170615	ENSG00000106013_ENSG00000170615	ENSG00000170615_ENSG00000106013	ANKRD7	SLC26A5	118355420	103399454	1044580	140546	2.65801	Inf	3	1
134494	133680	chr7	chr7	119400000	111260000	1348370000	1340230000	ENSG00000106013	ENSG00000184903	ENSG00000106013_ENSG00000184903	ENSG00000184903_ENSG00000106013	ANKRD7	IMMP2L	118355420	111112784	1044580	147216	2.65801	Inf	3	1
134851	4647	chr7	chr1	122970000	46960000	1351940000	46960000	ENSG00000128519	ENSG00000187048	ENSG00000128519_ENSG00000187048	ENSG00000187048_ENSG00000128519	TAS2R16	CYP4A11	122995202	46935330	-25202	24670	2.65801	Inf	3	1
134851	16334	chr7	chr1	122970000	163830000	1351940000	163830000	ENSG00000128519	ENSG00000143228	ENSG00000128519_ENSG00000143228	ENSG00000143228_ENSG00000128519	TAS2R16	NUF2	122995202	163311170	-25202	518830	2.65801	Inf	3	1
134851	16721	chr7	chr1	122970000	167700000	1351940000	167700000	ENSG00000128519	ENSG00000198771	ENSG00000128519_ENSG00000198771	ENSG00000198771_ENSG00000128519	TAS2R16	RCSD1	122995202	167669394	-25202	30606	2.65801	Inf	3	1
134851	17056	chr7	chr1	122970000	171050000	1351940000	171050000	ENSG00000128519	ENSG00000117501	ENSG00000128519_ENSG00000117501	ENSG00000117501_ENSG00000128519	TAS2R16	MROH9	122995202	171000118	-25202	49882	2.65801	Inf	3	1
134851	17058	chr7	chr1	122970000	171070000	1351940000	171070000	ENSG00000128519	ENSG00000007933	ENSG00000128519_ENSG00000007933	ENSG00000007933_ENSG00000128519	TAS2R16	FMO3	122995202	171104360	-25202	-34360	2.65801	Inf	3	1
134851	21854	chr7	chr1	122970000	219030000	1351940000	219030000	ENSG00000128519	ENSG00000143353	ENSG00000128519_ENSG00000143353	ENSG00000143353_ENSG00000128519	TAS2R16	LYPLAL1	122995202	219193367	-25202	-163367	2.65801	Inf	3	1
134851	25228	chr7	chr2	122970000	4810000	1351940000	253260000	ENSG00000128519	ENSG00000176887	ENSG00000128519_ENSG00000176887	ENSG00000176887_ENSG00000128519	TAS2R16	SOX11	122995202	5696884	-25202	-886884	2.65801	Inf	3	1
134851	50034	chr7	chr3	122970000	11670000	1351940000	501810000	ENSG00000128519	ENSG00000144560	ENSG00000128519_ENSG00000144560	ENSG00000144560_ENSG00000128519	TAS2R16	VGLL4	122995202	11663710	-25202	6290	2.65801	Inf	3	1
134851	50058	chr7	chr3	122970000	11910000	1351940000	502050000	ENSG00000128519	ENSG00000144559	ENSG00000128519_ENSG00000144559	ENSG00000144559_ENSG00000128519	TAS2R16	TAMM41	122995202	11818680	-25202	91320	2.65801	Inf	3	1
134851	51748	chr7	chr3	122970000	28810000	1351940000	518950000	ENSG00000128519	ENSG00000283563	ENSG00000128519_ENSG00000283563	ENSG00000283563_ENSG00000128519	TAS2R16	AC098650.1	122995202	29058358	-25202	-248358	2.65801	Inf	3	1
134851	52175	chr7	chr3	122970000	33080000	1351940000	523220000	ENSG00000128519	ENSG00000188167	ENSG00000128519_ENSG00000188167	ENSG00000188167_ENSG00000128519	TAS2R16	TMPPE	122995202	33093784	-25202	-13784	2.65801	Inf	3	1
134851	63247	chr7	chr3	122970000	143800000	1351940000	633940000	ENSG00000128519	ENSG00000181744	ENSG00000128519_ENSG00000181744	ENSG00000181744_ENSG00000128519	TAS2R16	DIPK2A	122995202	144010258	-25202	-210258	2.65801	Inf	3	1
134851	68051	chr7	chr3	122970000	191840000	1351940000	681980000	ENSG00000128519	ENSG00000253548	ENSG00000128519_ENSG00000253548	ENSG00000253548_ENSG00000128519	TAS2R16	PYDC2	122995202	191461310	-25202	378690	2.65801	Inf	3	1
134851	71844	chr7	chr4	122970000	32470000	1351940000	720400000	ENSG00000128519	ENSG00000169851	ENSG00000128519_ENSG00000169851	ENSG00000169851_ENSG00000128519	TAS2R16	PCDH7	122995202	30933610	-25202	1536390	2.65801	Inf	3	1
134851	86574	chr7	chr4	122970000	179770000	1351940000	867700000	ENSG00000128519	ENSG00000038002	ENSG00000128519_ENSG00000038002	ENSG00000038002_ENSG00000128519	TAS2R16	AGA	122995202	177436606	-25202	2333394	2.65801	Inf	3	1
134851	89134	chr7	chr5	122970000	16150000	1351940000	893790000	ENSG00000128519	ENSG00000183654	ENSG00000128519_ENSG00000183654	ENSG00000183654_ENSG00000128519	TAS2R16	2021-03-11	122995202	16123950	-25202	26050	2.65801	Inf	3	1
134851	89828	chr7	chr5	122970000	23090000	1351940000	900730000	ENSG00000128519	ENSG00000164256	ENSG00000128519_ENSG00000164256	ENSG00000164256_ENSG00000128519	TAS2R16	PRDM9	122995202	23486092	-25202	-396092	2.65801	Inf	3	1
134851	101840	chr7	chr5	122970000	143210000	1351940000	1020850000	ENSG00000128519	ENSG00000113580	ENSG00000128519_ENSG00000113580	ENSG00000113580_ENSG00000128519	TAS2R16	NR3C1	122995202	143356722	-25202	-146722	2.65801	Inf	3	1
134851	106738	chr7	chr6	122970000	11650000	1351940000	1070320000	ENSG00000128519	ENSG00000205269	ENSG00000128519_ENSG00000205269	ENSG00000205269_ENSG00000128519	TAS2R16	TMEM170B	122995202	11560636	-25202	89364	2.65801	Inf	3	1
134851	106747	chr7	chr6	122970000	11740000	1351940000	1070410000	ENSG00000128519	ENSG00000111863	ENSG00000128519_ENSG00000111863	ENSG00000111863_ENSG00000128519	TAS2R16	ADTRP	122995202	11759550	-25202	-19550	2.65801	Inf	3	1
134851	120362	chr7	chr6	122970000	147890000	1351940000	1206560000	ENSG00000128519	ENSG00000203727	ENSG00000128519_ENSG00000203727	ENSG00000203727_ENSG00000128519	TAS2R16	SAMD5	122995202	147623118	-25202	266882	2.65801	Inf	3	1
134851	123939	chr7	chr7	122970000	13850000	1351940000	1242820000	ENSG00000128519	ENSG00000006468	ENSG00000128519_ENSG00000006468	ENSG00000006468_ENSG00000128519	TAS2R16	ETV1	122995202	13941327	-25202	-91327	2.65801	Inf	3	1
134851	132908	chr7	chr7	122970000	103540000	1351940000	1332510000	ENSG00000128519	ENSG00000170615	ENSG00000128519_ENSG00000170615	ENSG00000170615_ENSG00000128519	TAS2R16	SLC26A5	122995202	103399454	-25202	140546	2.65801	Inf	3	1
134851	133680	chr7	chr7	122970000	111260000	1351940000	1340230000	ENSG00000128519	ENSG00000184903	ENSG00000128519_ENSG00000184903	ENSG00000184903_ENSG00000128519	TAS2R16	IMMP2L	122995202	111112784	-25202	147216	2.65801	Inf	3	1
134851	134494	chr7	chr7	122970000	119400000	1351940000	1348370000	ENSG00000128519	ENSG00000106013	ENSG00000128519_ENSG00000106013	ENSG00000106013_ENSG00000128519	TAS2R16	ANKRD7	122995202	118355420	-25202	1044580	2.65801	Inf	3	1
135101	28201	chr7	chr2	125470000	34540000	1354440000	282990000	ENSG00000128513	ENSG00000119812	ENSG00000128513_ENSG00000119812	ENSG00000119812_ENSG00000128513	POT1	FAM98A	124876184	33591521	593816	948479	2.02119	Inf	2	5
135101	30442	chr7	chr2	125470000	56950000	1354440000	305400000	ENSG00000128513	ENSG00000055813	ENSG00000128513_ENSG00000055813	ENSG00000055813_ENSG00000128513	POT1	CCDC85A	124876184	56285081	593816	664919	2.02119	Inf	2	5
135101	48694	chr7	chr2	125470000	239470000	1354440000	487920000	ENSG00000128513	ENSG00000068024	ENSG00000128513_ENSG00000068024	ENSG00000068024_ENSG00000128513	POT1	HDAC4	124876184	239224911	593816	245089	2.02119	Inf	2	5
135101	48711	chr7	chr2	125470000	239640000	1354440000	488090000	ENSG00000128513	ENSG00000130414	ENSG00000128513_ENSG00000130414	ENSG00000130414_ENSG00000128513	POT1	NDUFA10	124876184	239958898	593816	-318898	2.02119	Inf	2	5
135101	99357	chr7	chr5	125470000	118380000	1354440000	996020000	ENSG00000128513	ENSG00000169570	ENSG00000128513_ENSG00000169570	ENSG00000169570_ENSG00000128513	POT1	DTWD2	124876184	118912310	593816	-532310	2.02119	Inf	2	5
135802	1536	chr7	chr1	132480000	15850000	1361450000	15850000	ENSG00000221866	ENSG00000233954	ENSG00000221866_ENSG00000233954	ENSG00000233954_ENSG00000221866	PLXNA4	UQCRHL	132386010	15808258	93990	41742	3.47756	Inf	5	4
135802	2744	chr7	chr1	132480000	27930000	1361450000	27930000	ENSG00000221866	ENSG00000130768	ENSG00000221866_ENSG00000130768	ENSG00000130768_ENSG00000221866	PLXNA4	SMPDL3B	132386010	27947078	93990	-17078	3.47756	Inf	5	4
135802	6123	chr7	chr1	132480000	61720000	1361450000	61720000	ENSG00000221866	ENSG00000162604	ENSG00000221866_ENSG00000162604	ENSG00000162604_ENSG00000221866	PLXNA4	TM2D1	132386010	61703234	93990	16766	3.47756	Inf	5	4
135802	34805	chr7	chr2	132480000	100580000	1361450000	349030000	ENSG00000221866	ENSG00000115539	ENSG00000221866_ENSG00000115539	ENSG00000115539_ENSG00000221866	PLXNA4	PDCL3	132386010	100569866	93990	10134	3.47756	Inf	5	4
135802	87571	chr7	chr5	132480000	520000	1361450000	878160000	ENSG00000221866	ENSG00000066230	ENSG00000221866_ENSG00000066230	ENSG00000066230_ENSG00000221866	PLXNA4	SLC9A3	132386010	497395	93990	22605	3.47756	Inf	5	4
135802	87593	chr7	chr5	132480000	740000	1361450000	878380000	ENSG00000221866	ENSG00000286094	ENSG00000221866_ENSG00000286094	ENSG00000286094_ENSG00000221866	PLXNA4	AC026740.3	132386010	741864	93990	-1864	3.47756	Inf	5	4
135802	104583	chr7	chr5	132480000	170640000	1361450000	1048280000	ENSG00000221866	ENSG00000182132	ENSG00000221866_ENSG00000182132	ENSG00000182132_ENSG00000221866	PLXNA4	KCNIP1	132386010	170545060	93990	94940	3.47756	Inf	5	4
137147	4647	chr7	chr1	145930000	46960000	1374900000	46960000	ENSG00000196511	ENSG00000187048	ENSG00000196511_ENSG00000187048	ENSG00000187048_ENSG00000196511	TPK1	CYP4A11	144644168	46935330	1285832	24670	2.65801	Inf	3	1
137147	16334	chr7	chr1	145930000	163830000	1374900000	163830000	ENSG00000196511	ENSG00000143228	ENSG00000196511_ENSG00000143228	ENSG00000143228_ENSG00000196511	TPK1	NUF2	144644168	163311170	1285832	518830	2.65801	Inf	3	1
137147	16721	chr7	chr1	145930000	167700000	1374900000	167700000	ENSG00000196511	ENSG00000198771	ENSG00000196511_ENSG00000198771	ENSG00000198771_ENSG00000196511	TPK1	RCSD1	144644168	167669394	1285832	30606	2.65801	Inf	3	1
137147	17056	chr7	chr1	145930000	171050000	1374900000	171050000	ENSG00000196511	ENSG00000117501	ENSG00000196511_ENSG00000117501	ENSG00000117501_ENSG00000196511	TPK1	MROH9	144644168	171000118	1285832	49882	2.65801	Inf	3	1
137147	17058	chr7	chr1	145930000	171070000	1374900000	171070000	ENSG00000196511	ENSG00000007933	ENSG00000196511_ENSG00000007933	ENSG00000007933_ENSG00000196511	TPK1	FMO3	144644168	171104360	1285832	-34360	2.65801	Inf	3	1
137147	21854	chr7	chr1	145930000	219030000	1374900000	219030000	ENSG00000196511	ENSG00000143353	ENSG00000196511_ENSG00000143353	ENSG00000143353_ENSG00000196511	TPK1	LYPLAL1	144644168	219193367	1285832	-163367	2.65801	Inf	3	1
137147	25228	chr7	chr2	145930000	4810000	1374900000	253260000	ENSG00000196511	ENSG00000176887	ENSG00000196511_ENSG00000176887	ENSG00000176887_ENSG00000196511	TPK1	SOX11	144644168	5696884	1285832	-886884	2.65801	Inf	3	1
137147	50034	chr7	chr3	145930000	11670000	1374900000	501810000	ENSG00000196511	ENSG00000144560	ENSG00000196511_ENSG00000144560	ENSG00000144560_ENSG00000196511	TPK1	VGLL4	144644168	11663710	1285832	6290	2.65801	Inf	3	1
137147	50058	chr7	chr3	145930000	11910000	1374900000	502050000	ENSG00000196511	ENSG00000144559	ENSG00000196511_ENSG00000144559	ENSG00000144559_ENSG00000196511	TPK1	TAMM41	144644168	11818680	1285832	91320	2.65801	Inf	3	1
137147	51748	chr7	chr3	145930000	28810000	1374900000	518950000	ENSG00000196511	ENSG00000283563	ENSG00000196511_ENSG00000283563	ENSG00000283563_ENSG00000196511	TPK1	AC098650.1	144644168	29058358	1285832	-248358	2.65801	Inf	3	1
137147	52175	chr7	chr3	145930000	33080000	1374900000	523220000	ENSG00000196511	ENSG00000188167	ENSG00000196511_ENSG00000188167	ENSG00000188167_ENSG00000196511	TPK1	TMPPE	144644168	33093784	1285832	-13784	2.65801	Inf	3	1
137147	63247	chr7	chr3	145930000	143800000	1374900000	633940000	ENSG00000196511	ENSG00000181744	ENSG00000196511_ENSG00000181744	ENSG00000181744_ENSG00000196511	TPK1	DIPK2A	144644168	144010258	1285832	-210258	2.65801	Inf	3	1
137147	68051	chr7	chr3	145930000	191840000	1374900000	681980000	ENSG00000196511	ENSG00000253548	ENSG00000196511_ENSG00000253548	ENSG00000253548_ENSG00000196511	TPK1	PYDC2	144644168	191461310	1285832	378690	2.65801	Inf	3	1
137147	71844	chr7	chr4	145930000	32470000	1374900000	720400000	ENSG00000196511	ENSG00000169851	ENSG00000196511_ENSG00000169851	ENSG00000169851_ENSG00000196511	TPK1	PCDH7	144644168	30933610	1285832	1536390	2.65801	Inf	3	1
137147	86574	chr7	chr4	145930000	179770000	1374900000	867700000	ENSG00000196511	ENSG00000038002	ENSG00000196511_ENSG00000038002	ENSG00000038002_ENSG00000196511	TPK1	AGA	144644168	177436606	1285832	2333394	2.65801	Inf	3	1
137147	89134	chr7	chr5	145930000	16150000	1374900000	893790000	ENSG00000196511	ENSG00000183654	ENSG00000196511_ENSG00000183654	ENSG00000183654_ENSG00000196511	TPK1	2021-03-11	144644168	16123950	1285832	26050	2.65801	Inf	3	1
137147	89828	chr7	chr5	145930000	23090000	1374900000	900730000	ENSG00000196511	ENSG00000164256	ENSG00000196511_ENSG00000164256	ENSG00000164256_ENSG00000196511	TPK1	PRDM9	144644168	23486092	1285832	-396092	2.65801	Inf	3	1
137147	101840	chr7	chr5	145930000	143210000	1374900000	1020850000	ENSG00000196511	ENSG00000113580	ENSG00000196511_ENSG00000113580	ENSG00000113580_ENSG00000196511	TPK1	NR3C1	144644168	143356722	1285832	-146722	2.65801	Inf	3	1
137147	106738	chr7	chr6	145930000	11650000	1374900000	1070320000	ENSG00000196511	ENSG00000205269	ENSG00000196511_ENSG00000205269	ENSG00000205269_ENSG00000196511	TPK1	TMEM170B	144644168	11560636	1285832	89364	2.65801	Inf	3	1
137147	106747	chr7	chr6	145930000	11740000	1374900000	1070410000	ENSG00000196511	ENSG00000111863	ENSG00000196511_ENSG00000111863	ENSG00000111863_ENSG00000196511	TPK1	ADTRP	144644168	11759550	1285832	-19550	2.65801	Inf	3	1
137147	120362	chr7	chr6	145930000	147890000	1374900000	1206560000	ENSG00000196511	ENSG00000203727	ENSG00000196511_ENSG00000203727	ENSG00000203727_ENSG00000196511	TPK1	SAMD5	144644168	147623118	1285832	266882	2.65801	Inf	3	1
137147	123939	chr7	chr7	145930000	13850000	1374900000	1242820000	ENSG00000196511	ENSG00000006468	ENSG00000196511_ENSG00000006468	ENSG00000006468_ENSG00000196511	TPK1	ETV1	144644168	13941327	1285832	-91327	2.65801	Inf	3	1
137147	132908	chr7	chr7	145930000	103540000	1374900000	1332510000	ENSG00000196511	ENSG00000170615	ENSG00000196511_ENSG00000170615	ENSG00000170615_ENSG00000196511	TPK1	SLC26A5	144644168	103399454	1285832	140546	2.65801	Inf	3	1
137147	133680	chr7	chr7	145930000	111260000	1374900000	1340230000	ENSG00000196511	ENSG00000184903	ENSG00000196511_ENSG00000184903	ENSG00000184903_ENSG00000196511	TPK1	IMMP2L	144644168	111112784	1285832	147216	2.65801	Inf	3	1
137147	134494	chr7	chr7	145930000	119400000	1374900000	1348370000	ENSG00000196511	ENSG00000106013	ENSG00000196511_ENSG00000106013	ENSG00000106013_ENSG00000196511	TPK1	ANKRD7	144644168	118355420	1285832	1044580	2.65801	Inf	3	1
137147	134851	chr7	chr7	145930000	122970000	1374900000	1351940000	ENSG00000196511	ENSG00000128519	ENSG00000196511_ENSG00000128519	ENSG00000128519_ENSG00000196511	TPK1	TAS2R16	144644168	122995202	1285832	-25202	2.65801	Inf	3	1
137205	1264	chr7	chr1	146510000	13130000	1375480000	13130000	ENSG00000174469	ENSG00000275774	ENSG00000174469_ENSG00000275774	ENSG00000275774_ENSG00000174469	CNTNAP2	HNRNPCL2	147268500	13116175	-758500	13825	2.65801	Inf	3	0
137205	130492	chr7	chr7	146510000	79380000	1375480000	1308350000	ENSG00000174469	ENSG00000127955	ENSG00000174469_ENSG00000127955	ENSG00000127955_ENSG00000174469	CNTNAP2	GNAI1	147268500	79997104	-758500	-617104	2.65801	Inf	3	0
137496	87990	chr7	chr5	149420000	4710000	1378390000	882350000	ENSG00000196453	ENSG00000145536	ENSG00000196453_ENSG00000145536	ENSG00000145536_ENSG00000196453	ZNF777	ADAMTS16	149446212	5230317	-26212	-520317	3.47756	Inf	5	0
137515	87990	chr7	chr5	149610000	4710000	1378580000	882350000	ENSG00000133619	ENSG00000145536	ENSG00000133619_ENSG00000145536	ENSG00000145536_ENSG00000133619	KRBA1	ADAMTS16	149724678	5230317	-114678	-520317	3.47756	Inf	5	0
138438	2962	chr7	chr1	158840000	30110000	1387810000	30110000	ENSG00000117868	ENSG00000162510	ENSG00000117868_ENSG00000162510	ENSG00000162510_ENSG00000117868	ESYT2	MATN1	158780624	30717431	59376	-607431	3.13513	Inf	4	2
138438	4506	chr7	chr1	158840000	45550000	1387810000	45550000	ENSG00000117868	ENSG00000117448	ENSG00000117868_ENSG00000117448	ENSG00000117448_ENSG00000117868	ESYT2	AKR1A1	158780624	45560296	59376	-10296	3.13513	Inf	4	2
138438	5484	chr7	chr1	158840000	55330000	1387810000	55330000	ENSG00000117868	ENSG00000162402	ENSG00000117868_ENSG00000162402	ENSG00000162402_ENSG00000117868	ESYT2	USP24	158780624	55140862	59376	189138	3.13513	Inf	4	2
138438	15328	chr7	chr1	158840000	153770000	1387810000	153770000	ENSG00000117868	ENSG00000143554	ENSG00000117868_ENSG00000143554	ENSG00000143554_ENSG00000117868	ESYT2	SLC27A3	158780624	153777256	59376	-7256	3.13513	Inf	4	2
138438	34736	chr7	chr2	158840000	99890000	1387810000	348340000	ENSG00000117868	ENSG00000144218	ENSG00000117868_ENSG00000144218	ENSG00000144218_ENSG00000117868	ESYT2	AFF3	158780624	99844079	59376	45921	3.13513	Inf	4	2
138438	35141	chr7	chr2	158840000	103940000	1387810000	352390000	ENSG00000117868	ENSG00000198914	ENSG00000117868_ENSG00000198914	ENSG00000198914_ENSG00000117868	ESYT2	POU3F3	158780624	104857042	59376	-917042	3.13513	Inf	4	2
138438	39264	chr7	chr2	158840000	145170000	1387810000	393620000	ENSG00000117868	ENSG00000169554	ENSG00000117868_ENSG00000169554	ENSG00000169554_ENSG00000117868	ESYT2	ZEB2	158780624	144442710	59376	727290	3.13513	Inf	4	2
138438	71577	chr7	chr4	158840000	29800000	1387810000	717730000	ENSG00000117868	ENSG00000169851	ENSG00000117868_ENSG00000169851	ENSG00000169851_ENSG00000117868	ESYT2	PCDH7	158780624	30933610	59376	-1133610	3.13513	Inf	4	0
138438	78926	chr7	chr4	158840000	103290000	1387810000	791220000	ENSG00000117868	ENSG00000138778	ENSG00000117868_ENSG00000138778	ENSG00000138778_ENSG00000117868	ESYT2	CENPE	158780624	103152108	59376	137892	3.13513	Inf	4	2
138438	86737	chr7	chr4	158840000	181400000	1387810000	869330000	ENSG00000117868	ENSG00000218336	ENSG00000117868_ENSG00000218336	ENSG00000218336_ENSG00000117868	ESYT2	TENM3	158780624	182473506	59376	-1073506	3.13513	Inf	4	2
138438	121945	chr7	chr6	158840000	163720000	1387810000	1222390000	ENSG00000117868	ENSG00000112531	ENSG00000117868_ENSG00000112531	ENSG00000112531_ENSG00000117868	ESYT2	QKI	158780624	163496296	59376	223704	3.13513	Inf	4	2
138438	134157	chr7	chr7	158840000	116030000	1387810000	1345000000	ENSG00000117868	ENSG00000105967	ENSG00000117868_ENSG00000105967	ENSG00000105967_ENSG00000117868	ESYT2	TFEC	158780624	116047522	59376	-17522	3.13513	Inf	4	2
139179	4647	chr8	chr1	7900000	46960000	1395710000	46960000	ENSG00000171711	ENSG00000187048	ENSG00000171711_ENSG00000187048	ENSG00000187048_ENSG00000171711	DEFB4A	CYP4A11	7895670	46935330	4330	24670	2.65801	Inf	3	1
139179	16334	chr8	chr1	7900000	163830000	1395710000	163830000	ENSG00000171711	ENSG00000143228	ENSG00000171711_ENSG00000143228	ENSG00000143228_ENSG00000171711	DEFB4A	NUF2	7895670	163311170	4330	518830	2.65801	Inf	3	1
139179	16721	chr8	chr1	7900000	167700000	1395710000	167700000	ENSG00000171711	ENSG00000198771	ENSG00000171711_ENSG00000198771	ENSG00000198771_ENSG00000171711	DEFB4A	RCSD1	7895670	167669394	4330	30606	2.65801	Inf	3	1
139179	17056	chr8	chr1	7900000	171050000	1395710000	171050000	ENSG00000171711	ENSG00000117501	ENSG00000171711_ENSG00000117501	ENSG00000117501_ENSG00000171711	DEFB4A	MROH9	7895670	171000118	4330	49882	2.65801	Inf	3	1
139179	17058	chr8	chr1	7900000	171070000	1395710000	171070000	ENSG00000171711	ENSG00000007933	ENSG00000171711_ENSG00000007933	ENSG00000007933_ENSG00000171711	DEFB4A	FMO3	7895670	171104360	4330	-34360	2.65801	Inf	3	1
139179	21854	chr8	chr1	7900000	219030000	1395710000	219030000	ENSG00000171711	ENSG00000143353	ENSG00000171711_ENSG00000143353	ENSG00000143353_ENSG00000171711	DEFB4A	LYPLAL1	7895670	219193367	4330	-163367	2.65801	Inf	3	1
139179	25228	chr8	chr2	7900000	4810000	1395710000	253260000	ENSG00000171711	ENSG00000176887	ENSG00000171711_ENSG00000176887	ENSG00000176887_ENSG00000171711	DEFB4A	SOX11	7895670	5696884	4330	-886884	2.65801	Inf	3	1
139179	50034	chr8	chr3	7900000	11670000	1395710000	501810000	ENSG00000171711	ENSG00000144560	ENSG00000171711_ENSG00000144560	ENSG00000144560_ENSG00000171711	DEFB4A	VGLL4	7895670	11663710	4330	6290	2.65801	Inf	3	1
139179	50058	chr8	chr3	7900000	11910000	1395710000	502050000	ENSG00000171711	ENSG00000144559	ENSG00000171711_ENSG00000144559	ENSG00000144559_ENSG00000171711	DEFB4A	TAMM41	7895670	11818680	4330	91320	2.65801	Inf	3	1
139179	51748	chr8	chr3	7900000	28810000	1395710000	518950000	ENSG00000171711	ENSG00000283563	ENSG00000171711_ENSG00000283563	ENSG00000283563_ENSG00000171711	DEFB4A	AC098650.1	7895670	29058358	4330	-248358	2.65801	Inf	3	1
139179	52175	chr8	chr3	7900000	33080000	1395710000	523220000	ENSG00000171711	ENSG00000188167	ENSG00000171711_ENSG00000188167	ENSG00000188167_ENSG00000171711	DEFB4A	TMPPE	7895670	33093784	4330	-13784	2.65801	Inf	3	1
139179	63247	chr8	chr3	7900000	143800000	1395710000	633940000	ENSG00000171711	ENSG00000181744	ENSG00000171711_ENSG00000181744	ENSG00000181744_ENSG00000171711	DEFB4A	DIPK2A	7895670	144010258	4330	-210258	2.65801	Inf	3	1
139179	68051	chr8	chr3	7900000	191840000	1395710000	681980000	ENSG00000171711	ENSG00000253548	ENSG00000171711_ENSG00000253548	ENSG00000253548_ENSG00000171711	DEFB4A	PYDC2	7895670	191461310	4330	378690	2.65801	Inf	3	1
139179	71844	chr8	chr4	7900000	32470000	1395710000	720400000	ENSG00000171711	ENSG00000169851	ENSG00000171711_ENSG00000169851	ENSG00000169851_ENSG00000171711	DEFB4A	PCDH7	7895670	30933610	4330	1536390	2.65801	Inf	3	1
139179	86574	chr8	chr4	7900000	179770000	1395710000	867700000	ENSG00000171711	ENSG00000038002	ENSG00000171711_ENSG00000038002	ENSG00000038002_ENSG00000171711	DEFB4A	AGA	7895670	177436606	4330	2333394	2.65801	Inf	3	1
139179	89134	chr8	chr5	7900000	16150000	1395710000	893790000	ENSG00000171711	ENSG00000183654	ENSG00000171711_ENSG00000183654	ENSG00000183654_ENSG00000171711	DEFB4A	2021-03-11	7895670	16123950	4330	26050	2.65801	Inf	3	1
139179	89828	chr8	chr5	7900000	23090000	1395710000	900730000	ENSG00000171711	ENSG00000164256	ENSG00000171711_ENSG00000164256	ENSG00000164256_ENSG00000171711	DEFB4A	PRDM9	7895670	23486092	4330	-396092	2.65801	Inf	3	1
139179	101840	chr8	chr5	7900000	143210000	1395710000	1020850000	ENSG00000171711	ENSG00000113580	ENSG00000171711_ENSG00000113580	ENSG00000113580_ENSG00000171711	DEFB4A	NR3C1	7895670	143356722	4330	-146722	2.65801	Inf	3	1
139179	106738	chr8	chr6	7900000	11650000	1395710000	1070320000	ENSG00000171711	ENSG00000205269	ENSG00000171711_ENSG00000205269	ENSG00000205269_ENSG00000171711	DEFB4A	TMEM170B	7895670	11560636	4330	89364	2.65801	Inf	3	1
139179	106747	chr8	chr6	7900000	11740000	1395710000	1070410000	ENSG00000171711	ENSG00000111863	ENSG00000171711_ENSG00000111863	ENSG00000111863_ENSG00000171711	DEFB4A	ADTRP	7895670	11759550	4330	-19550	2.65801	Inf	3	1
139179	120362	chr8	chr6	7900000	147890000	1395710000	1206560000	ENSG00000171711	ENSG00000203727	ENSG00000171711_ENSG00000203727	ENSG00000203727_ENSG00000171711	DEFB4A	SAMD5	7895670	147623118	4330	266882	2.65801	Inf	3	1
139179	123939	chr8	chr7	7900000	13850000	1395710000	1242820000	ENSG00000171711	ENSG00000006468	ENSG00000171711_ENSG00000006468	ENSG00000006468_ENSG00000171711	DEFB4A	ETV1	7895670	13941327	4330	-91327	2.65801	Inf	3	1
139179	132908	chr8	chr7	7900000	103540000	1395710000	1332510000	ENSG00000171711	ENSG00000170615	ENSG00000171711_ENSG00000170615	ENSG00000170615_ENSG00000171711	DEFB4A	SLC26A5	7895670	103399454	4330	140546	2.65801	Inf	3	1
139179	133680	chr8	chr7	7900000	111260000	1395710000	1340230000	ENSG00000171711	ENSG00000184903	ENSG00000171711_ENSG00000184903	ENSG00000184903_ENSG00000171711	DEFB4A	IMMP2L	7895670	111112784	4330	147216	2.65801	Inf	3	1
139179	134494	chr8	chr7	7900000	119400000	1395710000	1348370000	ENSG00000171711	ENSG00000106013	ENSG00000171711_ENSG00000106013	ENSG00000106013_ENSG00000171711	DEFB4A	ANKRD7	7895670	118355420	4330	1044580	2.65801	Inf	3	1
139179	134851	chr8	chr7	7900000	122970000	1395710000	1351940000	ENSG00000171711	ENSG00000128519	ENSG00000171711_ENSG00000128519	ENSG00000128519_ENSG00000171711	DEFB4A	TAS2R16	7895670	122995202	4330	-25202	2.65801	Inf	3	1
139179	137147	chr8	chr7	7900000	145930000	1395710000	1374900000	ENSG00000171711	ENSG00000196511	ENSG00000171711_ENSG00000196511	ENSG00000196511_ENSG00000171711	DEFB4A	TPK1	7895670	144644168	4330	1285832	2.65801	Inf	3	1
143719	5475	chr8	chr1	53300000	55240000	1441110000	55240000	ENSG00000082556	ENSG00000162402	ENSG00000082556_ENSG00000162402	ENSG00000162402_ENSG00000082556	OPRK1	USP24	53238706	55140862	61294	99138	3.47756	Inf	5	0
143719	21260	chr8	chr1	53300000	213090000	1441110000	213090000	ENSG00000082556	ENSG00000136643	ENSG00000082556_ENSG00000136643	ENSG00000136643_ENSG00000082556	OPRK1	RPS6KC1	53238706	213163004	61294	-73004	3.47756	Inf	5	0
143719	81177	chr8	chr4	53300000	125800000	1441110000	813730000	ENSG00000082556	ENSG00000196159	ENSG00000082556_ENSG00000196159	ENSG00000196159_ENSG00000082556	OPRK1	FAT4	53238706	125404666	61294	395334	3.47756	Inf	5	0
143719	90043	chr8	chr5	53300000	25240000	1441110000	902880000	ENSG00000082556	ENSG00000040731	ENSG00000082556_ENSG00000040731	ENSG00000040731_ENSG00000082556	OPRK1	CDH10	53238706	24566039	61294	673961	3.47756	Inf	5	0
143719	133076	chr8	chr7	53300000	105220000	1441110000	1334190000	ENSG00000082556	ENSG00000135250	ENSG00000082556_ENSG00000135250	ENSG00000135250_ENSG00000082556	OPRK1	SRPK2	53238706	105255006	61294	-35006	3.47756	Inf	5	0
147644	8662	chr8	chr1	92550000	87110000	1480360000	87110000	ENSG00000205133	ENSG00000267561	ENSG00000205133_ENSG00000267561	ENSG00000267561_ENSG00000205133	TRIQK	AC093155.3	92950602	87081106	-400602	28894	3.6994	Inf	6	0
147644	40208	chr8	chr2	92550000	154610000	1480360000	403060000	ENSG00000205133	ENSG00000162989	ENSG00000205133_ENSG00000162989	ENSG00000162989_ENSG00000205133	TRIQK	KCNJ3	92950602	154778104	-400602	-168104	3.6994	Inf	6	0
147644	104371	chr8	chr5	92550000	168520000	1480360000	1046160000	ENSG00000205133	ENSG00000188573	ENSG00000205133_ENSG00000188573	ENSG00000188573_ENSG00000205133	TRIQK	FBLL1	92950602	168529875	-400602	-9875	3.6994	Inf	6	0
147652	9813	chr8	chr1	92630000	98620000	1480440000	98620000	ENSG00000205133	ENSG00000162627	ENSG00000205133_ENSG00000162627	ENSG00000162627_ENSG00000205133	TRIQK	SNX7	92950602	98711100	-320602	-91100	3.13513	Inf	4	3
147652	38953	chr8	chr2	92630000	142060000	1480440000	390510000	ENSG00000205133	ENSG00000168702	ENSG00000205133_ENSG00000168702	ENSG00000168702_ENSG00000205133	TRIQK	LRP1B	92950602	141181562	-320602	878438	3.13513	Inf	4	3
147652	56142	chr8	chr3	92630000	72750000	1480440000	562890000	ENSG00000205133	ENSG00000144736	ENSG00000205133_ENSG00000144736	ENSG00000144736_ENSG00000205133	TRIQK	SHQ1	92950602	72805596	-320602	-55596	3.13513	Inf	4	3
147652	131715	chr8	chr7	92630000	91610000	1480440000	1320580000	ENSG00000205133	ENSG00000127989	ENSG00000205133_ENSG00000127989	ENSG00000127989_ENSG00000205133	TRIQK	MTERF1	92950602	91786364	-320602	-176364	3.13513	Inf	4	3
147666	5475	chr8	chr1	92770000	55240000	1480580000	55240000	ENSG00000205133	ENSG00000162402	ENSG00000205133_ENSG00000162402	ENSG00000162402_ENSG00000205133	TRIQK	USP24	92950602	55140862	-180602	99138	3.47756	Inf	5	0
147666	21260	chr8	chr1	92770000	213090000	1480580000	213090000	ENSG00000205133	ENSG00000136643	ENSG00000205133_ENSG00000136643	ENSG00000136643_ENSG00000205133	TRIQK	RPS6KC1	92950602	213163004	-180602	-73004	3.47756	Inf	5	0
147666	81177	chr8	chr4	92770000	125800000	1480580000	813730000	ENSG00000205133	ENSG00000196159	ENSG00000205133_ENSG00000196159	ENSG00000196159_ENSG00000205133	TRIQK	FAT4	92950602	125404666	-180602	395334	3.47756	Inf	5	0
147666	90043	chr8	chr5	92770000	25240000	1480580000	902880000	ENSG00000205133	ENSG00000040731	ENSG00000205133_ENSG00000040731	ENSG00000040731_ENSG00000205133	TRIQK	CDH10	92950602	24566039	-180602	673961	3.47756	Inf	5	0
147666	133076	chr8	chr7	92770000	105220000	1480580000	1334190000	ENSG00000205133	ENSG00000135250	ENSG00000205133_ENSG00000135250	ENSG00000135250_ENSG00000205133	TRIQK	SRPK2	92950602	105255006	-180602	-35006	3.47756	Inf	5	0
147666	143719	chr8	chr8	92770000	53300000	1480580000	1441110000	ENSG00000205133	ENSG00000082556	ENSG00000205133_ENSG00000082556	ENSG00000082556_ENSG00000205133	TRIQK	OPRK1	92950602	53238706	-180602	61294	3.47756	Inf	5	0
147985	4647	chr8	chr1	95960000	46960000	1483770000	46960000	ENSG00000156466	ENSG00000187048	ENSG00000156466_ENSG00000187048	ENSG00000187048_ENSG00000156466	GDF6	CYP4A11	96151570	46935330	-191570	24670	2.65801	Inf	3	1
147985	16334	chr8	chr1	95960000	163830000	1483770000	163830000	ENSG00000156466	ENSG00000143228	ENSG00000156466_ENSG00000143228	ENSG00000143228_ENSG00000156466	GDF6	NUF2	96151570	163311170	-191570	518830	2.65801	Inf	3	1
147985	16721	chr8	chr1	95960000	167700000	1483770000	167700000	ENSG00000156466	ENSG00000198771	ENSG00000156466_ENSG00000198771	ENSG00000198771_ENSG00000156466	GDF6	RCSD1	96151570	167669394	-191570	30606	2.65801	Inf	3	1
147985	17056	chr8	chr1	95960000	171050000	1483770000	171050000	ENSG00000156466	ENSG00000117501	ENSG00000156466_ENSG00000117501	ENSG00000117501_ENSG00000156466	GDF6	MROH9	96151570	171000118	-191570	49882	2.65801	Inf	3	1
147985	17058	chr8	chr1	95960000	171070000	1483770000	171070000	ENSG00000156466	ENSG00000007933	ENSG00000156466_ENSG00000007933	ENSG00000007933_ENSG00000156466	GDF6	FMO3	96151570	171104360	-191570	-34360	2.65801	Inf	3	1
147985	21854	chr8	chr1	95960000	219030000	1483770000	219030000	ENSG00000156466	ENSG00000143353	ENSG00000156466_ENSG00000143353	ENSG00000143353_ENSG00000156466	GDF6	LYPLAL1	96151570	219193367	-191570	-163367	2.65801	Inf	3	1
147985	25228	chr8	chr2	95960000	4810000	1483770000	253260000	ENSG00000156466	ENSG00000176887	ENSG00000156466_ENSG00000176887	ENSG00000176887_ENSG00000156466	GDF6	SOX11	96151570	5696884	-191570	-886884	2.65801	Inf	3	1
147985	50034	chr8	chr3	95960000	11670000	1483770000	501810000	ENSG00000156466	ENSG00000144560	ENSG00000156466_ENSG00000144560	ENSG00000144560_ENSG00000156466	GDF6	VGLL4	96151570	11663710	-191570	6290	2.65801	Inf	3	1
147985	50058	chr8	chr3	95960000	11910000	1483770000	502050000	ENSG00000156466	ENSG00000144559	ENSG00000156466_ENSG00000144559	ENSG00000144559_ENSG00000156466	GDF6	TAMM41	96151570	11818680	-191570	91320	2.65801	Inf	3	1
147985	51748	chr8	chr3	95960000	28810000	1483770000	518950000	ENSG00000156466	ENSG00000283563	ENSG00000156466_ENSG00000283563	ENSG00000283563_ENSG00000156466	GDF6	AC098650.1	96151570	29058358	-191570	-248358	2.65801	Inf	3	1
147985	52175	chr8	chr3	95960000	33080000	1483770000	523220000	ENSG00000156466	ENSG00000188167	ENSG00000156466_ENSG00000188167	ENSG00000188167_ENSG00000156466	GDF6	TMPPE	96151570	33093784	-191570	-13784	2.65801	Inf	3	1
147985	63247	chr8	chr3	95960000	143800000	1483770000	633940000	ENSG00000156466	ENSG00000181744	ENSG00000156466_ENSG00000181744	ENSG00000181744_ENSG00000156466	GDF6	DIPK2A	96151570	144010258	-191570	-210258	2.65801	Inf	3	1
147985	68051	chr8	chr3	95960000	191840000	1483770000	681980000	ENSG00000156466	ENSG00000253548	ENSG00000156466_ENSG00000253548	ENSG00000253548_ENSG00000156466	GDF6	PYDC2	96151570	191461310	-191570	378690	2.65801	Inf	3	1
147985	71844	chr8	chr4	95960000	32470000	1483770000	720400000	ENSG00000156466	ENSG00000169851	ENSG00000156466_ENSG00000169851	ENSG00000169851_ENSG00000156466	GDF6	PCDH7	96151570	30933610	-191570	1536390	2.65801	Inf	3	1
147985	86574	chr8	chr4	95960000	179770000	1483770000	867700000	ENSG00000156466	ENSG00000038002	ENSG00000156466_ENSG00000038002	ENSG00000038002_ENSG00000156466	GDF6	AGA	96151570	177436606	-191570	2333394	2.65801	Inf	3	1
147985	89134	chr8	chr5	95960000	16150000	1483770000	893790000	ENSG00000156466	ENSG00000183654	ENSG00000156466_ENSG00000183654	ENSG00000183654_ENSG00000156466	GDF6	2021-03-11	96151570	16123950	-191570	26050	2.65801	Inf	3	1
147985	89828	chr8	chr5	95960000	23090000	1483770000	900730000	ENSG00000156466	ENSG00000164256	ENSG00000156466_ENSG00000164256	ENSG00000164256_ENSG00000156466	GDF6	PRDM9	96151570	23486092	-191570	-396092	2.65801	Inf	3	1
147985	101840	chr8	chr5	95960000	143210000	1483770000	1020850000	ENSG00000156466	ENSG00000113580	ENSG00000156466_ENSG00000113580	ENSG00000113580_ENSG00000156466	GDF6	NR3C1	96151570	143356722	-191570	-146722	2.65801	Inf	3	1
147985	106738	chr8	chr6	95960000	11650000	1483770000	1070320000	ENSG00000156466	ENSG00000205269	ENSG00000156466_ENSG00000205269	ENSG00000205269_ENSG00000156466	GDF6	TMEM170B	96151570	11560636	-191570	89364	2.65801	Inf	3	1
147985	106747	chr8	chr6	95960000	11740000	1483770000	1070410000	ENSG00000156466	ENSG00000111863	ENSG00000156466_ENSG00000111863	ENSG00000111863_ENSG00000156466	GDF6	ADTRP	96151570	11759550	-191570	-19550	2.65801	Inf	3	1
147985	120362	chr8	chr6	95960000	147890000	1483770000	1206560000	ENSG00000156466	ENSG00000203727	ENSG00000156466_ENSG00000203727	ENSG00000203727_ENSG00000156466	GDF6	SAMD5	96151570	147623118	-191570	266882	2.65801	Inf	3	1
147985	123939	chr8	chr7	95960000	13850000	1483770000	1242820000	ENSG00000156466	ENSG00000006468	ENSG00000156466_ENSG00000006468	ENSG00000006468_ENSG00000156466	GDF6	ETV1	96151570	13941327	-191570	-91327	2.65801	Inf	3	1
147985	132908	chr8	chr7	95960000	103540000	1483770000	1332510000	ENSG00000156466	ENSG00000170615	ENSG00000156466_ENSG00000170615	ENSG00000170615_ENSG00000156466	GDF6	SLC26A5	96151570	103399454	-191570	140546	2.65801	Inf	3	1
147985	133680	chr8	chr7	95960000	111260000	1483770000	1340230000	ENSG00000156466	ENSG00000184903	ENSG00000156466_ENSG00000184903	ENSG00000184903_ENSG00000156466	GDF6	IMMP2L	96151570	111112784	-191570	147216	2.65801	Inf	3	1
147985	134494	chr8	chr7	95960000	119400000	1483770000	1348370000	ENSG00000156466	ENSG00000106013	ENSG00000156466_ENSG00000106013	ENSG00000106013_ENSG00000156466	GDF6	ANKRD7	96151570	118355420	-191570	1044580	2.65801	Inf	3	1
147985	134851	chr8	chr7	95960000	122970000	1483770000	1351940000	ENSG00000156466	ENSG00000128519	ENSG00000156466_ENSG00000128519	ENSG00000128519_ENSG00000156466	GDF6	TAS2R16	96151570	122995202	-191570	-25202	2.65801	Inf	3	1
147985	137147	chr8	chr7	95960000	145930000	1483770000	1374900000	ENSG00000156466	ENSG00000196511	ENSG00000156466_ENSG00000196511	ENSG00000196511_ENSG00000156466	GDF6	TPK1	96151570	144644168	-191570	1285832	2.65801	Inf	3	1
147985	139179	chr8	chr8	95960000	7900000	1483770000	1395710000	ENSG00000156466	ENSG00000171711	ENSG00000156466_ENSG00000171711	ENSG00000171711_ENSG00000156466	GDF6	DEFB4A	96151570	7895670	-191570	4330	2.65801	Inf	3	1
148013	9813	chr8	chr1	96240000	98620000	1484050000	98620000	ENSG00000156467	ENSG00000162627	ENSG00000156467_ENSG00000162627	ENSG00000162627_ENSG00000156467	UQCRB	SNX7	96230777	98711100	9223	-91100	3.13513	Inf	4	3
148013	38953	chr8	chr2	96240000	142060000	1484050000	390510000	ENSG00000156467	ENSG00000168702	ENSG00000156467_ENSG00000168702	ENSG00000168702_ENSG00000156467	UQCRB	LRP1B	96230777	141181562	9223	878438	3.13513	Inf	4	3
148013	56142	chr8	chr3	96240000	72750000	1484050000	562890000	ENSG00000156467	ENSG00000144736	ENSG00000156467_ENSG00000144736	ENSG00000144736_ENSG00000156467	UQCRB	SHQ1	96230777	72805596	9223	-55596	3.13513	Inf	4	3
148013	131715	chr8	chr7	96240000	91610000	1484050000	1320580000	ENSG00000156467	ENSG00000127989	ENSG00000156467_ENSG00000127989	ENSG00000127989_ENSG00000156467	UQCRB	MTERF1	96230777	91786364	9223	-176364	3.13513	Inf	4	3
148013	147652	chr8	chr8	96240000	92630000	1484050000	1480440000	ENSG00000156467	ENSG00000205133	ENSG00000156467_ENSG00000205133	ENSG00000205133_ENSG00000156467	UQCRB	TRIQK	96230777	92950602	9223	-320602	3.13513	Inf	4	3
148189	9813	chr8	chr1	98000000	98620000	1485810000	98620000	ENSG00000156482	ENSG00000162627	ENSG00000156482_ENSG00000162627	ENSG00000162627_ENSG00000156482	RPL30	SNX7	98035660	98711100	-35660	-91100	3.13513	Inf	4	3
148189	38953	chr8	chr2	98000000	142060000	1485810000	390510000	ENSG00000156482	ENSG00000168702	ENSG00000156482_ENSG00000168702	ENSG00000168702_ENSG00000156482	RPL30	LRP1B	98035660	141181562	-35660	878438	3.13513	Inf	4	3
148189	56142	chr8	chr3	98000000	72750000	1485810000	562890000	ENSG00000156482	ENSG00000144736	ENSG00000156482_ENSG00000144736	ENSG00000144736_ENSG00000156482	RPL30	SHQ1	98035660	72805596	-35660	-55596	3.13513	Inf	4	3
148189	131715	chr8	chr7	98000000	91610000	1485810000	1320580000	ENSG00000156482	ENSG00000127989	ENSG00000156482_ENSG00000127989	ENSG00000127989_ENSG00000156482	RPL30	MTERF1	98035660	91786364	-35660	-176364	3.13513	Inf	4	3
148189	147652	chr8	chr8	98000000	92630000	1485810000	1480440000	ENSG00000156482	ENSG00000205133	ENSG00000156482_ENSG00000205133	ENSG00000205133_ENSG00000156482	RPL30	TRIQK	98035660	92950602	-35660	-320602	3.13513	Inf	4	3
148773	9813	chr8	chr1	103840000	98620000	1491650000	98620000	ENSG00000176406	ENSG00000162627	ENSG00000176406_ENSG00000162627	ENSG00000162627_ENSG00000176406	RIMS2	SNX7	103878395	98711100	-38395	-91100	3.13513	Inf	4	3
148773	38953	chr8	chr2	103840000	142060000	1491650000	390510000	ENSG00000176406	ENSG00000168702	ENSG00000176406_ENSG00000168702	ENSG00000168702_ENSG00000176406	RIMS2	LRP1B	103878395	141181562	-38395	878438	3.13513	Inf	4	3
148773	56142	chr8	chr3	103840000	72750000	1491650000	562890000	ENSG00000176406	ENSG00000144736	ENSG00000176406_ENSG00000144736	ENSG00000144736_ENSG00000176406	RIMS2	SHQ1	103878395	72805596	-38395	-55596	3.13513	Inf	4	3
148773	131715	chr8	chr7	103840000	91610000	1491650000	1320580000	ENSG00000176406	ENSG00000127989	ENSG00000176406_ENSG00000127989	ENSG00000127989_ENSG00000176406	RIMS2	MTERF1	103878395	91786364	-38395	-176364	3.13513	Inf	4	3
148773	147652	chr8	chr8	103840000	92630000	1491650000	1480440000	ENSG00000176406	ENSG00000205133	ENSG00000176406_ENSG00000205133	ENSG00000205133_ENSG00000176406	RIMS2	TRIQK	103878395	92950602	-38395	-320602	3.13513	Inf	4	3
148773	148013	chr8	chr8	103840000	96240000	1491650000	1484050000	ENSG00000176406	ENSG00000156467	ENSG00000176406_ENSG00000156467	ENSG00000156467_ENSG00000176406	RIMS2	UQCRB	103878395	96230777	-38395	9223	3.13513	Inf	4	3
148773	148189	chr8	chr8	103840000	98000000	1491650000	1485810000	ENSG00000176406	ENSG00000156482	ENSG00000176406_ENSG00000156482	ENSG00000156482_ENSG00000176406	RIMS2	RPL30	103878395	98035660	-38395	-35660	3.13513	Inf	4	3
149179	2962	chr8	chr1	107900000	30110000	1495710000	30110000	ENSG00000147655	ENSG00000162510	ENSG00000147655_ENSG00000162510	ENSG00000162510_ENSG00000147655	RSPO2	MATN1	107991479	30717431	-91479	-607431	3.13513	Inf	4	2
149179	4506	chr8	chr1	107900000	45550000	1495710000	45550000	ENSG00000147655	ENSG00000117448	ENSG00000147655_ENSG00000117448	ENSG00000117448_ENSG00000147655	RSPO2	AKR1A1	107991479	45560296	-91479	-10296	3.13513	Inf	4	2
149179	5484	chr8	chr1	107900000	55330000	1495710000	55330000	ENSG00000147655	ENSG00000162402	ENSG00000147655_ENSG00000162402	ENSG00000162402_ENSG00000147655	RSPO2	USP24	107991479	55140862	-91479	189138	3.13513	Inf	4	2
149179	15328	chr8	chr1	107900000	153770000	1495710000	153770000	ENSG00000147655	ENSG00000143554	ENSG00000147655_ENSG00000143554	ENSG00000143554_ENSG00000147655	RSPO2	SLC27A3	107991479	153777256	-91479	-7256	3.13513	Inf	4	2
149179	34736	chr8	chr2	107900000	99890000	1495710000	348340000	ENSG00000147655	ENSG00000144218	ENSG00000147655_ENSG00000144218	ENSG00000144218_ENSG00000147655	RSPO2	AFF3	107991479	99844079	-91479	45921	3.13513	Inf	4	2
149179	35141	chr8	chr2	107900000	103940000	1495710000	352390000	ENSG00000147655	ENSG00000198914	ENSG00000147655_ENSG00000198914	ENSG00000198914_ENSG00000147655	RSPO2	POU3F3	107991479	104857042	-91479	-917042	3.13513	Inf	4	2
149179	39264	chr8	chr2	107900000	145170000	1495710000	393620000	ENSG00000147655	ENSG00000169554	ENSG00000147655_ENSG00000169554	ENSG00000169554_ENSG00000147655	RSPO2	ZEB2	107991479	144442710	-91479	727290	3.13513	Inf	4	2
149179	71577	chr8	chr4	107900000	29800000	1495710000	717730000	ENSG00000147655	ENSG00000169851	ENSG00000147655_ENSG00000169851	ENSG00000169851_ENSG00000147655	RSPO2	PCDH7	107991479	30933610	-91479	-1133610	3.13513	Inf	4	0
149179	78926	chr8	chr4	107900000	103290000	1495710000	791220000	ENSG00000147655	ENSG00000138778	ENSG00000147655_ENSG00000138778	ENSG00000138778_ENSG00000147655	RSPO2	CENPE	107991479	103152108	-91479	137892	3.13513	Inf	4	2
149179	86737	chr8	chr4	107900000	181400000	1495710000	869330000	ENSG00000147655	ENSG00000218336	ENSG00000147655_ENSG00000218336	ENSG00000218336_ENSG00000147655	RSPO2	TENM3	107991479	182473506	-91479	-1073506	3.13513	Inf	4	2
149179	121945	chr8	chr6	107900000	163720000	1495710000	1222390000	ENSG00000147655	ENSG00000112531	ENSG00000147655_ENSG00000112531	ENSG00000112531_ENSG00000147655	RSPO2	QKI	107991479	163496296	-91479	223704	3.13513	Inf	4	2
149179	134157	chr8	chr7	107900000	116030000	1495710000	1345000000	ENSG00000147655	ENSG00000105967	ENSG00000147655_ENSG00000105967	ENSG00000105967_ENSG00000147655	RSPO2	TFEC	107991479	116047522	-91479	-17522	3.13513	Inf	4	2
149179	138438	chr8	chr7	107900000	158840000	1495710000	1387810000	ENSG00000147655	ENSG00000117868	ENSG00000147655_ENSG00000117868	ENSG00000117868_ENSG00000147655	RSPO2	ESYT2	107991479	158780624	-91479	59376	3.13513	Inf	4	2
149388	9813	chr8	chr1	109990000	98620000	1497800000	98620000	ENSG00000164794	ENSG00000162627	ENSG00000164794_ENSG00000162627	ENSG00000162627_ENSG00000164794	KCNV1	SNX7	109969704	98711100	20296	-91100	3.13513	Inf	4	3
149388	38953	chr8	chr2	109990000	142060000	1497800000	390510000	ENSG00000164794	ENSG00000168702	ENSG00000164794_ENSG00000168702	ENSG00000168702_ENSG00000164794	KCNV1	LRP1B	109969704	141181562	20296	878438	3.13513	Inf	4	3
149388	56142	chr8	chr3	109990000	72750000	1497800000	562890000	ENSG00000164794	ENSG00000144736	ENSG00000164794_ENSG00000144736	ENSG00000144736_ENSG00000164794	KCNV1	SHQ1	109969704	72805596	20296	-55596	3.13513	Inf	4	3
149388	131715	chr8	chr7	109990000	91610000	1497800000	1320580000	ENSG00000164794	ENSG00000127989	ENSG00000164794_ENSG00000127989	ENSG00000127989_ENSG00000164794	KCNV1	MTERF1	109969704	91786364	20296	-176364	3.13513	Inf	4	3
149388	147652	chr8	chr8	109990000	92630000	1497800000	1480440000	ENSG00000164794	ENSG00000205133	ENSG00000164794_ENSG00000205133	ENSG00000205133_ENSG00000164794	KCNV1	TRIQK	109969704	92950602	20296	-320602	3.13513	Inf	4	3
149388	148013	chr8	chr8	109990000	96240000	1497800000	1484050000	ENSG00000164794	ENSG00000156467	ENSG00000164794_ENSG00000156467	ENSG00000156467_ENSG00000164794	KCNV1	UQCRB	109969704	96230777	20296	9223	3.13513	Inf	4	3
149388	148189	chr8	chr8	109990000	98000000	1497800000	1485810000	ENSG00000164794	ENSG00000156482	ENSG00000164794_ENSG00000156482	ENSG00000156482_ENSG00000164794	KCNV1	RPL30	109969704	98035660	20296	-35660	3.13513	Inf	4	3
149388	148773	chr8	chr8	109990000	103840000	1497800000	1491650000	ENSG00000164794	ENSG00000176406	ENSG00000164794_ENSG00000176406	ENSG00000176406_ENSG00000164794	KCNV1	RIMS2	109969704	103878395	20296	-38395	3.13513	Inf	4	3
152113	4647	chr8	chr1	137240000	46960000	1525050000	46960000	ENSG00000147724	ENSG00000187048	ENSG00000147724_ENSG00000187048	ENSG00000187048_ENSG00000147724	FAM135B	CYP4A11	138313642	46935330	-1073642	24670	2.65801	Inf	3	1
152113	16334	chr8	chr1	137240000	163830000	1525050000	163830000	ENSG00000147724	ENSG00000143228	ENSG00000147724_ENSG00000143228	ENSG00000143228_ENSG00000147724	FAM135B	NUF2	138313642	163311170	-1073642	518830	2.65801	Inf	3	1
152113	16721	chr8	chr1	137240000	167700000	1525050000	167700000	ENSG00000147724	ENSG00000198771	ENSG00000147724_ENSG00000198771	ENSG00000198771_ENSG00000147724	FAM135B	RCSD1	138313642	167669394	-1073642	30606	2.65801	Inf	3	1
152113	17056	chr8	chr1	137240000	171050000	1525050000	171050000	ENSG00000147724	ENSG00000117501	ENSG00000147724_ENSG00000117501	ENSG00000117501_ENSG00000147724	FAM135B	MROH9	138313642	171000118	-1073642	49882	2.65801	Inf	3	1
152113	17058	chr8	chr1	137240000	171070000	1525050000	171070000	ENSG00000147724	ENSG00000007933	ENSG00000147724_ENSG00000007933	ENSG00000007933_ENSG00000147724	FAM135B	FMO3	138313642	171104360	-1073642	-34360	2.65801	Inf	3	1
152113	21854	chr8	chr1	137240000	219030000	1525050000	219030000	ENSG00000147724	ENSG00000143353	ENSG00000147724_ENSG00000143353	ENSG00000143353_ENSG00000147724	FAM135B	LYPLAL1	138313642	219193367	-1073642	-163367	2.65801	Inf	3	1
152113	25228	chr8	chr2	137240000	4810000	1525050000	253260000	ENSG00000147724	ENSG00000176887	ENSG00000147724_ENSG00000176887	ENSG00000176887_ENSG00000147724	FAM135B	SOX11	138313642	5696884	-1073642	-886884	2.65801	Inf	3	1
152113	50034	chr8	chr3	137240000	11670000	1525050000	501810000	ENSG00000147724	ENSG00000144560	ENSG00000147724_ENSG00000144560	ENSG00000144560_ENSG00000147724	FAM135B	VGLL4	138313642	11663710	-1073642	6290	2.65801	Inf	3	1
152113	50058	chr8	chr3	137240000	11910000	1525050000	502050000	ENSG00000147724	ENSG00000144559	ENSG00000147724_ENSG00000144559	ENSG00000144559_ENSG00000147724	FAM135B	TAMM41	138313642	11818680	-1073642	91320	2.65801	Inf	3	1
152113	51748	chr8	chr3	137240000	28810000	1525050000	518950000	ENSG00000147724	ENSG00000283563	ENSG00000147724_ENSG00000283563	ENSG00000283563_ENSG00000147724	FAM135B	AC098650.1	138313642	29058358	-1073642	-248358	2.65801	Inf	3	1
152113	52175	chr8	chr3	137240000	33080000	1525050000	523220000	ENSG00000147724	ENSG00000188167	ENSG00000147724_ENSG00000188167	ENSG00000188167_ENSG00000147724	FAM135B	TMPPE	138313642	33093784	-1073642	-13784	2.65801	Inf	3	1
152113	63247	chr8	chr3	137240000	143800000	1525050000	633940000	ENSG00000147724	ENSG00000181744	ENSG00000147724_ENSG00000181744	ENSG00000181744_ENSG00000147724	FAM135B	DIPK2A	138313642	144010258	-1073642	-210258	2.65801	Inf	3	1
152113	68051	chr8	chr3	137240000	191840000	1525050000	681980000	ENSG00000147724	ENSG00000253548	ENSG00000147724_ENSG00000253548	ENSG00000253548_ENSG00000147724	FAM135B	PYDC2	138313642	191461310	-1073642	378690	2.65801	Inf	3	1
152113	71844	chr8	chr4	137240000	32470000	1525050000	720400000	ENSG00000147724	ENSG00000169851	ENSG00000147724_ENSG00000169851	ENSG00000169851_ENSG00000147724	FAM135B	PCDH7	138313642	30933610	-1073642	1536390	2.65801	Inf	3	1
152113	86574	chr8	chr4	137240000	179770000	1525050000	867700000	ENSG00000147724	ENSG00000038002	ENSG00000147724_ENSG00000038002	ENSG00000038002_ENSG00000147724	FAM135B	AGA	138313642	177436606	-1073642	2333394	2.65801	Inf	3	1
152113	89134	chr8	chr5	137240000	16150000	1525050000	893790000	ENSG00000147724	ENSG00000183654	ENSG00000147724_ENSG00000183654	ENSG00000183654_ENSG00000147724	FAM135B	2021-03-11	138313642	16123950	-1073642	26050	2.65801	Inf	3	1
152113	89828	chr8	chr5	137240000	23090000	1525050000	900730000	ENSG00000147724	ENSG00000164256	ENSG00000147724_ENSG00000164256	ENSG00000164256_ENSG00000147724	FAM135B	PRDM9	138313642	23486092	-1073642	-396092	2.65801	Inf	3	1
152113	101840	chr8	chr5	137240000	143210000	1525050000	1020850000	ENSG00000147724	ENSG00000113580	ENSG00000147724_ENSG00000113580	ENSG00000113580_ENSG00000147724	FAM135B	NR3C1	138313642	143356722	-1073642	-146722	2.65801	Inf	3	1
152113	106738	chr8	chr6	137240000	11650000	1525050000	1070320000	ENSG00000147724	ENSG00000205269	ENSG00000147724_ENSG00000205269	ENSG00000205269_ENSG00000147724	FAM135B	TMEM170B	138313642	11560636	-1073642	89364	2.65801	Inf	3	1
152113	106747	chr8	chr6	137240000	11740000	1525050000	1070410000	ENSG00000147724	ENSG00000111863	ENSG00000147724_ENSG00000111863	ENSG00000111863_ENSG00000147724	FAM135B	ADTRP	138313642	11759550	-1073642	-19550	2.65801	Inf	3	1
152113	120362	chr8	chr6	137240000	147890000	1525050000	1206560000	ENSG00000147724	ENSG00000203727	ENSG00000147724_ENSG00000203727	ENSG00000203727_ENSG00000147724	FAM135B	SAMD5	138313642	147623118	-1073642	266882	2.65801	Inf	3	1
152113	123939	chr8	chr7	137240000	13850000	1525050000	1242820000	ENSG00000147724	ENSG00000006468	ENSG00000147724_ENSG00000006468	ENSG00000006468_ENSG00000147724	FAM135B	ETV1	138313642	13941327	-1073642	-91327	2.65801	Inf	3	1
152113	132908	chr8	chr7	137240000	103540000	1525050000	1332510000	ENSG00000147724	ENSG00000170615	ENSG00000147724_ENSG00000170615	ENSG00000170615_ENSG00000147724	FAM135B	SLC26A5	138313642	103399454	-1073642	140546	2.65801	Inf	3	1
152113	133680	chr8	chr7	137240000	111260000	1525050000	1340230000	ENSG00000147724	ENSG00000184903	ENSG00000147724_ENSG00000184903	ENSG00000184903_ENSG00000147724	FAM135B	IMMP2L	138313642	111112784	-1073642	147216	2.65801	Inf	3	1
152113	134494	chr8	chr7	137240000	119400000	1525050000	1348370000	ENSG00000147724	ENSG00000106013	ENSG00000147724_ENSG00000106013	ENSG00000106013_ENSG00000147724	FAM135B	ANKRD7	138313642	118355420	-1073642	1044580	2.65801	Inf	3	1
152113	134851	chr8	chr7	137240000	122970000	1525050000	1351940000	ENSG00000147724	ENSG00000128519	ENSG00000147724_ENSG00000128519	ENSG00000128519_ENSG00000147724	FAM135B	TAS2R16	138313642	122995202	-1073642	-25202	2.65801	Inf	3	1
152113	137147	chr8	chr7	137240000	145930000	1525050000	1374900000	ENSG00000147724	ENSG00000196511	ENSG00000147724_ENSG00000196511	ENSG00000196511_ENSG00000147724	FAM135B	TPK1	138313642	144644168	-1073642	1285832	2.65801	Inf	3	1
152113	139179	chr8	chr8	137240000	7900000	1525050000	1395710000	ENSG00000147724	ENSG00000171711	ENSG00000147724_ENSG00000171711	ENSG00000171711_ENSG00000147724	FAM135B	DEFB4A	138313642	7895670	-1073642	4330	2.65801	Inf	3	1
152113	147985	chr8	chr8	137240000	95960000	1525050000	1483770000	ENSG00000147724	ENSG00000156466	ENSG00000147724_ENSG00000156466	ENSG00000156466_ENSG00000147724	FAM135B	GDF6	138313642	96151570	-1073642	-191570	2.65801	Inf	3	1
152347	28201	chr8	chr2	139580000	34540000	1527390000	282990000	ENSG00000169427	ENSG00000119812	ENSG00000169427_ENSG00000119812	ENSG00000119812_ENSG00000169427	KCNK9	FAM98A	139652474	33591521	-72474	948479	2.02119	Inf	2	5
152347	30442	chr8	chr2	139580000	56950000	1527390000	305400000	ENSG00000169427	ENSG00000055813	ENSG00000169427_ENSG00000055813	ENSG00000055813_ENSG00000169427	KCNK9	CCDC85A	139652474	56285081	-72474	664919	2.02119	Inf	2	5
152347	48694	chr8	chr2	139580000	239470000	1527390000	487920000	ENSG00000169427	ENSG00000068024	ENSG00000169427_ENSG00000068024	ENSG00000068024_ENSG00000169427	KCNK9	HDAC4	139652474	239224911	-72474	245089	2.02119	Inf	2	5
152347	48711	chr8	chr2	139580000	239640000	1527390000	488090000	ENSG00000169427	ENSG00000130414	ENSG00000169427_ENSG00000130414	ENSG00000130414_ENSG00000169427	KCNK9	NDUFA10	139652474	239958898	-72474	-318898	2.02119	Inf	2	5
152347	99357	chr8	chr5	139580000	118380000	1527390000	996020000	ENSG00000169427	ENSG00000169570	ENSG00000169427_ENSG00000169570	ENSG00000169570_ENSG00000169427	KCNK9	DTWD2	139652474	118912310	-72474	-532310	2.02119	Inf	2	5
152347	135101	chr8	chr7	139580000	125470000	1527390000	1354440000	ENSG00000169427	ENSG00000128513	ENSG00000169427_ENSG00000128513	ENSG00000128513_ENSG00000169427	KCNK9	POT1	139652474	124876184	-72474	593816	2.02119	Inf	2	5
153385	28201	chr9	chr2	5820000	34540000	1538260000	282990000	ENSG00000099219	ENSG00000119812	ENSG00000099219_ENSG00000119812	ENSG00000119812_ENSG00000099219	ERMP1	FAM98A	5799096	33591521	20904	948479	2.02119	Inf	2	5
153385	30442	chr9	chr2	5820000	56950000	1538260000	305400000	ENSG00000099219	ENSG00000055813	ENSG00000099219_ENSG00000055813	ENSG00000055813_ENSG00000099219	ERMP1	CCDC85A	5799096	56285081	20904	664919	2.02119	Inf	2	5
153385	48694	chr9	chr2	5820000	239470000	1538260000	487920000	ENSG00000099219	ENSG00000068024	ENSG00000099219_ENSG00000068024	ENSG00000068024_ENSG00000099219	ERMP1	HDAC4	5799096	239224911	20904	245089	2.02119	Inf	2	5
153385	48711	chr9	chr2	5820000	239640000	1538260000	488090000	ENSG00000099219	ENSG00000130414	ENSG00000099219_ENSG00000130414	ENSG00000130414_ENSG00000099219	ERMP1	NDUFA10	5799096	239958898	20904	-318898	2.02119	Inf	2	5
153385	99357	chr9	chr5	5820000	118380000	1538260000	996020000	ENSG00000099219	ENSG00000169570	ENSG00000099219_ENSG00000169570	ENSG00000169570_ENSG00000099219	ERMP1	DTWD2	5799096	118912310	20904	-532310	2.02119	Inf	2	5
153385	135101	chr9	chr7	5820000	125470000	1538260000	1354440000	ENSG00000099219	ENSG00000128513	ENSG00000099219_ENSG00000128513	ENSG00000128513_ENSG00000099219	ERMP1	POT1	5799096	124876184	20904	593816	2.02119	Inf	2	5
153385	152347	chr9	chr8	5820000	139580000	1538260000	1527390000	ENSG00000099219	ENSG00000169427	ENSG00000099219_ENSG00000169427	ENSG00000169427_ENSG00000099219	ERMP1	KCNK9	5799096	139652474	20904	-72474	2.02119	Inf	2	5
153672	9813	chr9	chr1	8690000	98620000	1541130000	98620000	ENSG00000153707	ENSG00000162627	ENSG00000153707_ENSG00000162627	ENSG00000162627_ENSG00000153707	PTPRD	SNX7	9463484	98711100	-773484	-91100	3.13513	Inf	4	3
153672	38953	chr9	chr2	8690000	142060000	1541130000	390510000	ENSG00000153707	ENSG00000168702	ENSG00000153707_ENSG00000168702	ENSG00000168702_ENSG00000153707	PTPRD	LRP1B	9463484	141181562	-773484	878438	3.13513	Inf	4	3
153672	56142	chr9	chr3	8690000	72750000	1541130000	562890000	ENSG00000153707	ENSG00000144736	ENSG00000153707_ENSG00000144736	ENSG00000144736_ENSG00000153707	PTPRD	SHQ1	9463484	72805596	-773484	-55596	3.13513	Inf	4	3
153672	131715	chr9	chr7	8690000	91610000	1541130000	1320580000	ENSG00000153707	ENSG00000127989	ENSG00000153707_ENSG00000127989	ENSG00000127989_ENSG00000153707	PTPRD	MTERF1	9463484	91786364	-773484	-176364	3.13513	Inf	4	3
153672	147652	chr9	chr8	8690000	92630000	1541130000	1480440000	ENSG00000153707	ENSG00000205133	ENSG00000153707_ENSG00000205133	ENSG00000205133_ENSG00000153707	PTPRD	TRIQK	9463484	92950602	-773484	-320602	3.13513	Inf	4	3
153672	148013	chr9	chr8	8690000	96240000	1541130000	1484050000	ENSG00000153707	ENSG00000156467	ENSG00000153707_ENSG00000156467	ENSG00000156467_ENSG00000153707	PTPRD	UQCRB	9463484	96230777	-773484	9223	3.13513	Inf	4	3
153672	148189	chr9	chr8	8690000	98000000	1541130000	1485810000	ENSG00000153707	ENSG00000156482	ENSG00000153707_ENSG00000156482	ENSG00000156482_ENSG00000153707	PTPRD	RPL30	9463484	98035660	-773484	-35660	3.13513	Inf	4	3
153672	148773	chr9	chr8	8690000	103840000	1541130000	1491650000	ENSG00000153707	ENSG00000176406	ENSG00000153707_ENSG00000176406	ENSG00000176406_ENSG00000153707	PTPRD	RIMS2	9463484	103878395	-773484	-38395	3.13513	Inf	4	3
153672	149388	chr9	chr8	8690000	109990000	1541130000	1497800000	ENSG00000153707	ENSG00000164794	ENSG00000153707_ENSG00000164794	ENSG00000164794_ENSG00000153707	PTPRD	KCNV1	9463484	109969704	-773484	20296	3.13513	Inf	4	3
153951	28201	chr9	chr2	11480000	34540000	1543920000	282990000	ENSG00000107165	ENSG00000119812	ENSG00000107165_ENSG00000119812	ENSG00000119812_ENSG00000107165	TYRP1	FAM98A	12697864	33591521	-1217864	948479	2.02119	Inf	2	5
153951	30442	chr9	chr2	11480000	56950000	1543920000	305400000	ENSG00000107165	ENSG00000055813	ENSG00000107165_ENSG00000055813	ENSG00000055813_ENSG00000107165	TYRP1	CCDC85A	12697864	56285081	-1217864	664919	2.02119	Inf	2	5
153951	48694	chr9	chr2	11480000	239470000	1543920000	487920000	ENSG00000107165	ENSG00000068024	ENSG00000107165_ENSG00000068024	ENSG00000068024_ENSG00000107165	TYRP1	HDAC4	12697864	239224911	-1217864	245089	2.02119	Inf	2	5
153951	48711	chr9	chr2	11480000	239640000	1543920000	488090000	ENSG00000107165	ENSG00000130414	ENSG00000107165_ENSG00000130414	ENSG00000130414_ENSG00000107165	TYRP1	NDUFA10	12697864	239958898	-1217864	-318898	2.02119	Inf	2	5
153951	99357	chr9	chr5	11480000	118380000	1543920000	996020000	ENSG00000107165	ENSG00000169570	ENSG00000107165_ENSG00000169570	ENSG00000169570_ENSG00000107165	TYRP1	DTWD2	12697864	118912310	-1217864	-532310	2.02119	Inf	2	5
153951	135101	chr9	chr7	11480000	125470000	1543920000	1354440000	ENSG00000107165	ENSG00000128513	ENSG00000107165_ENSG00000128513	ENSG00000128513_ENSG00000107165	TYRP1	POT1	12697864	124876184	-1217864	593816	2.02119	Inf	2	5
153951	152347	chr9	chr8	11480000	139580000	1543920000	1527390000	ENSG00000107165	ENSG00000169427	ENSG00000107165_ENSG00000169427	ENSG00000169427_ENSG00000107165	TYRP1	KCNK9	12697864	139652474	-1217864	-72474	2.02119	Inf	2	5
153951	153385	chr9	chr9	11480000	5820000	1543920000	1538260000	ENSG00000107165	ENSG00000099219	ENSG00000107165_ENSG00000099219	ENSG00000099219_ENSG00000107165	TYRP1	ERMP1	12697864	5799096	-1217864	20904	2.02119	Inf	2	5
154400	2962	chr9	chr1	15970000	30110000	1548410000	30110000	ENSG00000164989	ENSG00000162510	ENSG00000164989_ENSG00000162510	ENSG00000162510_ENSG00000164989	CCDC171	MATN1	15807353	30717431	162647	-607431	3.13513	Inf	4	2
154400	4506	chr9	chr1	15970000	45550000	1548410000	45550000	ENSG00000164989	ENSG00000117448	ENSG00000164989_ENSG00000117448	ENSG00000117448_ENSG00000164989	CCDC171	AKR1A1	15807353	45560296	162647	-10296	3.13513	Inf	4	2
154400	5484	chr9	chr1	15970000	55330000	1548410000	55330000	ENSG00000164989	ENSG00000162402	ENSG00000164989_ENSG00000162402	ENSG00000162402_ENSG00000164989	CCDC171	USP24	15807353	55140862	162647	189138	3.13513	Inf	4	2
154400	15328	chr9	chr1	15970000	153770000	1548410000	153770000	ENSG00000164989	ENSG00000143554	ENSG00000164989_ENSG00000143554	ENSG00000143554_ENSG00000164989	CCDC171	SLC27A3	15807353	153777256	162647	-7256	3.13513	Inf	4	2
154400	34736	chr9	chr2	15970000	99890000	1548410000	348340000	ENSG00000164989	ENSG00000144218	ENSG00000164989_ENSG00000144218	ENSG00000144218_ENSG00000164989	CCDC171	AFF3	15807353	99844079	162647	45921	3.13513	Inf	4	2
154400	35141	chr9	chr2	15970000	103940000	1548410000	352390000	ENSG00000164989	ENSG00000198914	ENSG00000164989_ENSG00000198914	ENSG00000198914_ENSG00000164989	CCDC171	POU3F3	15807353	104857042	162647	-917042	3.13513	Inf	4	2
154400	39264	chr9	chr2	15970000	145170000	1548410000	393620000	ENSG00000164989	ENSG00000169554	ENSG00000164989_ENSG00000169554	ENSG00000169554_ENSG00000164989	CCDC171	ZEB2	15807353	144442710	162647	727290	3.13513	Inf	4	2
154400	71577	chr9	chr4	15970000	29800000	1548410000	717730000	ENSG00000164989	ENSG00000169851	ENSG00000164989_ENSG00000169851	ENSG00000169851_ENSG00000164989	CCDC171	PCDH7	15807353	30933610	162647	-1133610	3.13513	Inf	4	0
154400	78926	chr9	chr4	15970000	103290000	1548410000	791220000	ENSG00000164989	ENSG00000138778	ENSG00000164989_ENSG00000138778	ENSG00000138778_ENSG00000164989	CCDC171	CENPE	15807353	103152108	162647	137892	3.13513	Inf	4	2
154400	86737	chr9	chr4	15970000	181400000	1548410000	869330000	ENSG00000164989	ENSG00000218336	ENSG00000164989_ENSG00000218336	ENSG00000218336_ENSG00000164989	CCDC171	TENM3	15807353	182473506	162647	-1073506	3.13513	Inf	4	2
154400	121945	chr9	chr6	15970000	163720000	1548410000	1222390000	ENSG00000164989	ENSG00000112531	ENSG00000164989_ENSG00000112531	ENSG00000112531_ENSG00000164989	CCDC171	QKI	15807353	163496296	162647	223704	3.13513	Inf	4	2
154400	134157	chr9	chr7	15970000	116030000	1548410000	1345000000	ENSG00000164989	ENSG00000105967	ENSG00000164989_ENSG00000105967	ENSG00000105967_ENSG00000164989	CCDC171	TFEC	15807353	116047522	162647	-17522	3.13513	Inf	4	2
154400	138438	chr9	chr7	15970000	158840000	1548410000	1387810000	ENSG00000164989	ENSG00000117868	ENSG00000164989_ENSG00000117868	ENSG00000117868_ENSG00000164989	CCDC171	ESYT2	15807353	158780624	162647	59376	3.13513	Inf	4	2
154400	149179	chr9	chr8	15970000	107900000	1548410000	1495710000	ENSG00000164989	ENSG00000147655	ENSG00000164989_ENSG00000147655	ENSG00000147655_ENSG00000164989	CCDC171	RSPO2	15807353	107991479	162647	-91479	3.13513	Inf	4	2
154677	9813	chr9	chr1	18740000	98620000	1551180000	98620000	ENSG00000155875	ENSG00000162627	ENSG00000155875_ENSG00000162627	ENSG00000162627_ENSG00000155875	SAXO1	SNX7	18954132	98711100	-214132	-91100	3.13513	Inf	4	3
154677	38953	chr9	chr2	18740000	142060000	1551180000	390510000	ENSG00000155875	ENSG00000168702	ENSG00000155875_ENSG00000168702	ENSG00000168702_ENSG00000155875	SAXO1	LRP1B	18954132	141181562	-214132	878438	3.13513	Inf	4	3
154677	56142	chr9	chr3	18740000	72750000	1551180000	562890000	ENSG00000155875	ENSG00000144736	ENSG00000155875_ENSG00000144736	ENSG00000144736_ENSG00000155875	SAXO1	SHQ1	18954132	72805596	-214132	-55596	3.13513	Inf	4	3
154677	131715	chr9	chr7	18740000	91610000	1551180000	1320580000	ENSG00000155875	ENSG00000127989	ENSG00000155875_ENSG00000127989	ENSG00000127989_ENSG00000155875	SAXO1	MTERF1	18954132	91786364	-214132	-176364	3.13513	Inf	4	3
154677	147652	chr9	chr8	18740000	92630000	1551180000	1480440000	ENSG00000155875	ENSG00000205133	ENSG00000155875_ENSG00000205133	ENSG00000205133_ENSG00000155875	SAXO1	TRIQK	18954132	92950602	-214132	-320602	3.13513	Inf	4	3
154677	148013	chr9	chr8	18740000	96240000	1551180000	1484050000	ENSG00000155875	ENSG00000156467	ENSG00000155875_ENSG00000156467	ENSG00000156467_ENSG00000155875	SAXO1	UQCRB	18954132	96230777	-214132	9223	3.13513	Inf	4	3
154677	148189	chr9	chr8	18740000	98000000	1551180000	1485810000	ENSG00000155875	ENSG00000156482	ENSG00000155875_ENSG00000156482	ENSG00000156482_ENSG00000155875	SAXO1	RPL30	18954132	98035660	-214132	-35660	3.13513	Inf	4	3
154677	148773	chr9	chr8	18740000	103840000	1551180000	1491650000	ENSG00000155875	ENSG00000176406	ENSG00000155875_ENSG00000176406	ENSG00000176406_ENSG00000155875	SAXO1	RIMS2	18954132	103878395	-214132	-38395	3.13513	Inf	4	3
154677	149388	chr9	chr8	18740000	109990000	1551180000	1497800000	ENSG00000155875	ENSG00000164794	ENSG00000155875_ENSG00000164794	ENSG00000164794_ENSG00000155875	SAXO1	KCNV1	18954132	109969704	-214132	20296	3.13513	Inf	4	3
154677	153672	chr9	chr9	18740000	8690000	1551180000	1541130000	ENSG00000155875	ENSG00000153707	ENSG00000155875_ENSG00000153707	ENSG00000153707_ENSG00000155875	SAXO1	PTPRD	18954132	9463484	-214132	-773484	3.13513	Inf	4	3
160196	4647	chr9	chr1	73930000	46960000	1606370000	46960000	ENSG00000198963	ENSG00000187048	ENSG00000198963_ENSG00000187048	ENSG00000187048_ENSG00000198963	RORB	CYP4A11	74595256	46935330	-665256	24670	2.65801	Inf	3	1
160196	16334	chr9	chr1	73930000	163830000	1606370000	163830000	ENSG00000198963	ENSG00000143228	ENSG00000198963_ENSG00000143228	ENSG00000143228_ENSG00000198963	RORB	NUF2	74595256	163311170	-665256	518830	2.65801	Inf	3	1
160196	16721	chr9	chr1	73930000	167700000	1606370000	167700000	ENSG00000198963	ENSG00000198771	ENSG00000198963_ENSG00000198771	ENSG00000198771_ENSG00000198963	RORB	RCSD1	74595256	167669394	-665256	30606	2.65801	Inf	3	1
160196	17056	chr9	chr1	73930000	171050000	1606370000	171050000	ENSG00000198963	ENSG00000117501	ENSG00000198963_ENSG00000117501	ENSG00000117501_ENSG00000198963	RORB	MROH9	74595256	171000118	-665256	49882	2.65801	Inf	3	1
160196	17058	chr9	chr1	73930000	171070000	1606370000	171070000	ENSG00000198963	ENSG00000007933	ENSG00000198963_ENSG00000007933	ENSG00000007933_ENSG00000198963	RORB	FMO3	74595256	171104360	-665256	-34360	2.65801	Inf	3	1
160196	21854	chr9	chr1	73930000	219030000	1606370000	219030000	ENSG00000198963	ENSG00000143353	ENSG00000198963_ENSG00000143353	ENSG00000143353_ENSG00000198963	RORB	LYPLAL1	74595256	219193367	-665256	-163367	2.65801	Inf	3	1
160196	25228	chr9	chr2	73930000	4810000	1606370000	253260000	ENSG00000198963	ENSG00000176887	ENSG00000198963_ENSG00000176887	ENSG00000176887_ENSG00000198963	RORB	SOX11	74595256	5696884	-665256	-886884	2.65801	Inf	3	1
160196	50034	chr9	chr3	73930000	11670000	1606370000	501810000	ENSG00000198963	ENSG00000144560	ENSG00000198963_ENSG00000144560	ENSG00000144560_ENSG00000198963	RORB	VGLL4	74595256	11663710	-665256	6290	2.65801	Inf	3	1
160196	50058	chr9	chr3	73930000	11910000	1606370000	502050000	ENSG00000198963	ENSG00000144559	ENSG00000198963_ENSG00000144559	ENSG00000144559_ENSG00000198963	RORB	TAMM41	74595256	11818680	-665256	91320	2.65801	Inf	3	1
160196	51748	chr9	chr3	73930000	28810000	1606370000	518950000	ENSG00000198963	ENSG00000283563	ENSG00000198963_ENSG00000283563	ENSG00000283563_ENSG00000198963	RORB	AC098650.1	74595256	29058358	-665256	-248358	2.65801	Inf	3	1
160196	52175	chr9	chr3	73930000	33080000	1606370000	523220000	ENSG00000198963	ENSG00000188167	ENSG00000198963_ENSG00000188167	ENSG00000188167_ENSG00000198963	RORB	TMPPE	74595256	33093784	-665256	-13784	2.65801	Inf	3	1
160196	63247	chr9	chr3	73930000	143800000	1606370000	633940000	ENSG00000198963	ENSG00000181744	ENSG00000198963_ENSG00000181744	ENSG00000181744_ENSG00000198963	RORB	DIPK2A	74595256	144010258	-665256	-210258	2.65801	Inf	3	1
160196	68051	chr9	chr3	73930000	191840000	1606370000	681980000	ENSG00000198963	ENSG00000253548	ENSG00000198963_ENSG00000253548	ENSG00000253548_ENSG00000198963	RORB	PYDC2	74595256	191461310	-665256	378690	2.65801	Inf	3	1
160196	71844	chr9	chr4	73930000	32470000	1606370000	720400000	ENSG00000198963	ENSG00000169851	ENSG00000198963_ENSG00000169851	ENSG00000169851_ENSG00000198963	RORB	PCDH7	74595256	30933610	-665256	1536390	2.65801	Inf	3	1
160196	86574	chr9	chr4	73930000	179770000	1606370000	867700000	ENSG00000198963	ENSG00000038002	ENSG00000198963_ENSG00000038002	ENSG00000038002_ENSG00000198963	RORB	AGA	74595256	177436606	-665256	2333394	2.65801	Inf	3	1
160196	89134	chr9	chr5	73930000	16150000	1606370000	893790000	ENSG00000198963	ENSG00000183654	ENSG00000198963_ENSG00000183654	ENSG00000183654_ENSG00000198963	RORB	2021-03-11	74595256	16123950	-665256	26050	2.65801	Inf	3	1
160196	89828	chr9	chr5	73930000	23090000	1606370000	900730000	ENSG00000198963	ENSG00000164256	ENSG00000198963_ENSG00000164256	ENSG00000164256_ENSG00000198963	RORB	PRDM9	74595256	23486092	-665256	-396092	2.65801	Inf	3	1
160196	101840	chr9	chr5	73930000	143210000	1606370000	1020850000	ENSG00000198963	ENSG00000113580	ENSG00000198963_ENSG00000113580	ENSG00000113580_ENSG00000198963	RORB	NR3C1	74595256	143356722	-665256	-146722	2.65801	Inf	3	1
160196	106738	chr9	chr6	73930000	11650000	1606370000	1070320000	ENSG00000198963	ENSG00000205269	ENSG00000198963_ENSG00000205269	ENSG00000205269_ENSG00000198963	RORB	TMEM170B	74595256	11560636	-665256	89364	2.65801	Inf	3	1
160196	106747	chr9	chr6	73930000	11740000	1606370000	1070410000	ENSG00000198963	ENSG00000111863	ENSG00000198963_ENSG00000111863	ENSG00000111863_ENSG00000198963	RORB	ADTRP	74595256	11759550	-665256	-19550	2.65801	Inf	3	1
160196	120362	chr9	chr6	73930000	147890000	1606370000	1206560000	ENSG00000198963	ENSG00000203727	ENSG00000198963_ENSG00000203727	ENSG00000203727_ENSG00000198963	RORB	SAMD5	74595256	147623118	-665256	266882	2.65801	Inf	3	1
160196	123939	chr9	chr7	73930000	13850000	1606370000	1242820000	ENSG00000198963	ENSG00000006468	ENSG00000198963_ENSG00000006468	ENSG00000006468_ENSG00000198963	RORB	ETV1	74595256	13941327	-665256	-91327	2.65801	Inf	3	1
160196	132908	chr9	chr7	73930000	103540000	1606370000	1332510000	ENSG00000198963	ENSG00000170615	ENSG00000198963_ENSG00000170615	ENSG00000170615_ENSG00000198963	RORB	SLC26A5	74595256	103399454	-665256	140546	2.65801	Inf	3	1
160196	133680	chr9	chr7	73930000	111260000	1606370000	1340230000	ENSG00000198963	ENSG00000184903	ENSG00000198963_ENSG00000184903	ENSG00000184903_ENSG00000198963	RORB	IMMP2L	74595256	111112784	-665256	147216	2.65801	Inf	3	1
160196	134494	chr9	chr7	73930000	119400000	1606370000	1348370000	ENSG00000198963	ENSG00000106013	ENSG00000198963_ENSG00000106013	ENSG00000106013_ENSG00000198963	RORB	ANKRD7	74595256	118355420	-665256	1044580	2.65801	Inf	3	1
160196	134851	chr9	chr7	73930000	122970000	1606370000	1351940000	ENSG00000198963	ENSG00000128519	ENSG00000198963_ENSG00000128519	ENSG00000128519_ENSG00000198963	RORB	TAS2R16	74595256	122995202	-665256	-25202	2.65801	Inf	3	1
160196	137147	chr9	chr7	73930000	145930000	1606370000	1374900000	ENSG00000198963	ENSG00000196511	ENSG00000198963_ENSG00000196511	ENSG00000196511_ENSG00000198963	RORB	TPK1	74595256	144644168	-665256	1285832	2.65801	Inf	3	1
160196	139179	chr9	chr8	73930000	7900000	1606370000	1395710000	ENSG00000198963	ENSG00000171711	ENSG00000198963_ENSG00000171711	ENSG00000171711_ENSG00000198963	RORB	DEFB4A	74595256	7895670	-665256	4330	2.65801	Inf	3	1
160196	147985	chr9	chr8	73930000	95960000	1606370000	1483770000	ENSG00000198963	ENSG00000156466	ENSG00000198963_ENSG00000156466	ENSG00000156466_ENSG00000198963	RORB	GDF6	74595256	96151570	-665256	-191570	2.65801	Inf	3	1
160196	152113	chr9	chr8	73930000	137240000	1606370000	1525050000	ENSG00000198963	ENSG00000147724	ENSG00000198963_ENSG00000147724	ENSG00000147724_ENSG00000198963	RORB	FAM135B	74595256	138313642	-665256	-1073642	2.65801	Inf	3	1
160498	4647	chr9	chr1	76950000	46960000	1609390000	46960000	ENSG00000204612	ENSG00000187048	ENSG00000204612_ENSG00000187048	ENSG00000187048_ENSG00000204612	FOXB2	CYP4A11	77020304	46935330	-70304	24670	2.65801	Inf	3	1
160498	16334	chr9	chr1	76950000	163830000	1609390000	163830000	ENSG00000204612	ENSG00000143228	ENSG00000204612_ENSG00000143228	ENSG00000143228_ENSG00000204612	FOXB2	NUF2	77020304	163311170	-70304	518830	2.65801	Inf	3	1
160498	16721	chr9	chr1	76950000	167700000	1609390000	167700000	ENSG00000204612	ENSG00000198771	ENSG00000204612_ENSG00000198771	ENSG00000198771_ENSG00000204612	FOXB2	RCSD1	77020304	167669394	-70304	30606	2.65801	Inf	3	1
160498	17056	chr9	chr1	76950000	171050000	1609390000	171050000	ENSG00000204612	ENSG00000117501	ENSG00000204612_ENSG00000117501	ENSG00000117501_ENSG00000204612	FOXB2	MROH9	77020304	171000118	-70304	49882	2.65801	Inf	3	1
160498	17058	chr9	chr1	76950000	171070000	1609390000	171070000	ENSG00000204612	ENSG00000007933	ENSG00000204612_ENSG00000007933	ENSG00000007933_ENSG00000204612	FOXB2	FMO3	77020304	171104360	-70304	-34360	2.65801	Inf	3	1
160498	21854	chr9	chr1	76950000	219030000	1609390000	219030000	ENSG00000204612	ENSG00000143353	ENSG00000204612_ENSG00000143353	ENSG00000143353_ENSG00000204612	FOXB2	LYPLAL1	77020304	219193367	-70304	-163367	2.65801	Inf	3	1
160498	25228	chr9	chr2	76950000	4810000	1609390000	253260000	ENSG00000204612	ENSG00000176887	ENSG00000204612_ENSG00000176887	ENSG00000176887_ENSG00000204612	FOXB2	SOX11	77020304	5696884	-70304	-886884	2.65801	Inf	3	1
160498	50034	chr9	chr3	76950000	11670000	1609390000	501810000	ENSG00000204612	ENSG00000144560	ENSG00000204612_ENSG00000144560	ENSG00000144560_ENSG00000204612	FOXB2	VGLL4	77020304	11663710	-70304	6290	2.65801	Inf	3	1
160498	50058	chr9	chr3	76950000	11910000	1609390000	502050000	ENSG00000204612	ENSG00000144559	ENSG00000204612_ENSG00000144559	ENSG00000144559_ENSG00000204612	FOXB2	TAMM41	77020304	11818680	-70304	91320	2.65801	Inf	3	1
160498	51748	chr9	chr3	76950000	28810000	1609390000	518950000	ENSG00000204612	ENSG00000283563	ENSG00000204612_ENSG00000283563	ENSG00000283563_ENSG00000204612	FOXB2	AC098650.1	77020304	29058358	-70304	-248358	2.65801	Inf	3	1
160498	52175	chr9	chr3	76950000	33080000	1609390000	523220000	ENSG00000204612	ENSG00000188167	ENSG00000204612_ENSG00000188167	ENSG00000188167_ENSG00000204612	FOXB2	TMPPE	77020304	33093784	-70304	-13784	2.65801	Inf	3	1
160498	63247	chr9	chr3	76950000	143800000	1609390000	633940000	ENSG00000204612	ENSG00000181744	ENSG00000204612_ENSG00000181744	ENSG00000181744_ENSG00000204612	FOXB2	DIPK2A	77020304	144010258	-70304	-210258	2.65801	Inf	3	1
160498	68051	chr9	chr3	76950000	191840000	1609390000	681980000	ENSG00000204612	ENSG00000253548	ENSG00000204612_ENSG00000253548	ENSG00000253548_ENSG00000204612	FOXB2	PYDC2	77020304	191461310	-70304	378690	2.65801	Inf	3	1
160498	71844	chr9	chr4	76950000	32470000	1609390000	720400000	ENSG00000204612	ENSG00000169851	ENSG00000204612_ENSG00000169851	ENSG00000169851_ENSG00000204612	FOXB2	PCDH7	77020304	30933610	-70304	1536390	2.65801	Inf	3	1
160498	86574	chr9	chr4	76950000	179770000	1609390000	867700000	ENSG00000204612	ENSG00000038002	ENSG00000204612_ENSG00000038002	ENSG00000038002_ENSG00000204612	FOXB2	AGA	77020304	177436606	-70304	2333394	2.65801	Inf	3	1
160498	89134	chr9	chr5	76950000	16150000	1609390000	893790000	ENSG00000204612	ENSG00000183654	ENSG00000204612_ENSG00000183654	ENSG00000183654_ENSG00000204612	FOXB2	2021-03-11	77020304	16123950	-70304	26050	2.65801	Inf	3	1
160498	89828	chr9	chr5	76950000	23090000	1609390000	900730000	ENSG00000204612	ENSG00000164256	ENSG00000204612_ENSG00000164256	ENSG00000164256_ENSG00000204612	FOXB2	PRDM9	77020304	23486092	-70304	-396092	2.65801	Inf	3	1
160498	101840	chr9	chr5	76950000	143210000	1609390000	1020850000	ENSG00000204612	ENSG00000113580	ENSG00000204612_ENSG00000113580	ENSG00000113580_ENSG00000204612	FOXB2	NR3C1	77020304	143356722	-70304	-146722	2.65801	Inf	3	1
160498	106738	chr9	chr6	76950000	11650000	1609390000	1070320000	ENSG00000204612	ENSG00000205269	ENSG00000204612_ENSG00000205269	ENSG00000205269_ENSG00000204612	FOXB2	TMEM170B	77020304	11560636	-70304	89364	2.65801	Inf	3	1
160498	106747	chr9	chr6	76950000	11740000	1609390000	1070410000	ENSG00000204612	ENSG00000111863	ENSG00000204612_ENSG00000111863	ENSG00000111863_ENSG00000204612	FOXB2	ADTRP	77020304	11759550	-70304	-19550	2.65801	Inf	3	1
160498	120362	chr9	chr6	76950000	147890000	1609390000	1206560000	ENSG00000204612	ENSG00000203727	ENSG00000204612_ENSG00000203727	ENSG00000203727_ENSG00000204612	FOXB2	SAMD5	77020304	147623118	-70304	266882	2.65801	Inf	3	1
160498	123939	chr9	chr7	76950000	13850000	1609390000	1242820000	ENSG00000204612	ENSG00000006468	ENSG00000204612_ENSG00000006468	ENSG00000006468_ENSG00000204612	FOXB2	ETV1	77020304	13941327	-70304	-91327	2.65801	Inf	3	1
160498	132908	chr9	chr7	76950000	103540000	1609390000	1332510000	ENSG00000204612	ENSG00000170615	ENSG00000204612_ENSG00000170615	ENSG00000170615_ENSG00000204612	FOXB2	SLC26A5	77020304	103399454	-70304	140546	2.65801	Inf	3	1
160498	133680	chr9	chr7	76950000	111260000	1609390000	1340230000	ENSG00000204612	ENSG00000184903	ENSG00000204612_ENSG00000184903	ENSG00000184903_ENSG00000204612	FOXB2	IMMP2L	77020304	111112784	-70304	147216	2.65801	Inf	3	1
160498	134494	chr9	chr7	76950000	119400000	1609390000	1348370000	ENSG00000204612	ENSG00000106013	ENSG00000204612_ENSG00000106013	ENSG00000106013_ENSG00000204612	FOXB2	ANKRD7	77020304	118355420	-70304	1044580	2.65801	Inf	3	1
160498	134851	chr9	chr7	76950000	122970000	1609390000	1351940000	ENSG00000204612	ENSG00000128519	ENSG00000204612_ENSG00000128519	ENSG00000128519_ENSG00000204612	FOXB2	TAS2R16	77020304	122995202	-70304	-25202	2.65801	Inf	3	1
160498	137147	chr9	chr7	76950000	145930000	1609390000	1374900000	ENSG00000204612	ENSG00000196511	ENSG00000204612_ENSG00000196511	ENSG00000196511_ENSG00000204612	FOXB2	TPK1	77020304	144644168	-70304	1285832	2.65801	Inf	3	1
160498	139179	chr9	chr8	76950000	7900000	1609390000	1395710000	ENSG00000204612	ENSG00000171711	ENSG00000204612_ENSG00000171711	ENSG00000171711_ENSG00000204612	FOXB2	DEFB4A	77020304	7895670	-70304	4330	2.65801	Inf	3	1
160498	147985	chr9	chr8	76950000	95960000	1609390000	1483770000	ENSG00000204612	ENSG00000156466	ENSG00000204612_ENSG00000156466	ENSG00000156466_ENSG00000204612	FOXB2	GDF6	77020304	96151570	-70304	-191570	2.65801	Inf	3	1
160498	152113	chr9	chr8	76950000	137240000	1609390000	1525050000	ENSG00000204612	ENSG00000147724	ENSG00000204612_ENSG00000147724	ENSG00000147724_ENSG00000204612	FOXB2	FAM135B	77020304	138313642	-70304	-1073642	2.65801	Inf	3	1
160498	160196	chr9	chr9	76950000	73930000	1609390000	1606370000	ENSG00000204612	ENSG00000198963	ENSG00000204612_ENSG00000198963	ENSG00000198963_ENSG00000204612	FOXB2	RORB	77020304	74595256	-70304	-665256	2.65801	Inf	3	1
161567	161261	chr9	chr9	87640000	84580000	1620080000	1617020000	ENSG00000196730	ENSG00000148053	ENSG00000196730_ENSG00000148053	ENSG00000148053_ENSG00000196730	DAPK1	NTRK2	87602931	84847810	37069	-267810	3.13513	Inf	4	0
161805	4647	chr9	chr1	90020000	46960000	1622460000	46960000	ENSG00000130222	ENSG00000187048	ENSG00000130222_ENSG00000187048	ENSG00000187048_ENSG00000130222	GADD45G	CYP4A11	89605784	46935330	414216	24670	2.65801	Inf	3	1
161805	16334	chr9	chr1	90020000	163830000	1622460000	163830000	ENSG00000130222	ENSG00000143228	ENSG00000130222_ENSG00000143228	ENSG00000143228_ENSG00000130222	GADD45G	NUF2	89605784	163311170	414216	518830	2.65801	Inf	3	1
161805	16721	chr9	chr1	90020000	167700000	1622460000	167700000	ENSG00000130222	ENSG00000198771	ENSG00000130222_ENSG00000198771	ENSG00000198771_ENSG00000130222	GADD45G	RCSD1	89605784	167669394	414216	30606	2.65801	Inf	3	1
161805	17056	chr9	chr1	90020000	171050000	1622460000	171050000	ENSG00000130222	ENSG00000117501	ENSG00000130222_ENSG00000117501	ENSG00000117501_ENSG00000130222	GADD45G	MROH9	89605784	171000118	414216	49882	2.65801	Inf	3	1
161805	17058	chr9	chr1	90020000	171070000	1622460000	171070000	ENSG00000130222	ENSG00000007933	ENSG00000130222_ENSG00000007933	ENSG00000007933_ENSG00000130222	GADD45G	FMO3	89605784	171104360	414216	-34360	2.65801	Inf	3	1
161805	21854	chr9	chr1	90020000	219030000	1622460000	219030000	ENSG00000130222	ENSG00000143353	ENSG00000130222_ENSG00000143353	ENSG00000143353_ENSG00000130222	GADD45G	LYPLAL1	89605784	219193367	414216	-163367	2.65801	Inf	3	1
161805	25228	chr9	chr2	90020000	4810000	1622460000	253260000	ENSG00000130222	ENSG00000176887	ENSG00000130222_ENSG00000176887	ENSG00000176887_ENSG00000130222	GADD45G	SOX11	89605784	5696884	414216	-886884	2.65801	Inf	3	1
161805	50034	chr9	chr3	90020000	11670000	1622460000	501810000	ENSG00000130222	ENSG00000144560	ENSG00000130222_ENSG00000144560	ENSG00000144560_ENSG00000130222	GADD45G	VGLL4	89605784	11663710	414216	6290	2.65801	Inf	3	1
161805	50058	chr9	chr3	90020000	11910000	1622460000	502050000	ENSG00000130222	ENSG00000144559	ENSG00000130222_ENSG00000144559	ENSG00000144559_ENSG00000130222	GADD45G	TAMM41	89605784	11818680	414216	91320	2.65801	Inf	3	1
161805	51748	chr9	chr3	90020000	28810000	1622460000	518950000	ENSG00000130222	ENSG00000283563	ENSG00000130222_ENSG00000283563	ENSG00000283563_ENSG00000130222	GADD45G	AC098650.1	89605784	29058358	414216	-248358	2.65801	Inf	3	1
161805	52175	chr9	chr3	90020000	33080000	1622460000	523220000	ENSG00000130222	ENSG00000188167	ENSG00000130222_ENSG00000188167	ENSG00000188167_ENSG00000130222	GADD45G	TMPPE	89605784	33093784	414216	-13784	2.65801	Inf	3	1
161805	63247	chr9	chr3	90020000	143800000	1622460000	633940000	ENSG00000130222	ENSG00000181744	ENSG00000130222_ENSG00000181744	ENSG00000181744_ENSG00000130222	GADD45G	DIPK2A	89605784	144010258	414216	-210258	2.65801	Inf	3	1
161805	68051	chr9	chr3	90020000	191840000	1622460000	681980000	ENSG00000130222	ENSG00000253548	ENSG00000130222_ENSG00000253548	ENSG00000253548_ENSG00000130222	GADD45G	PYDC2	89605784	191461310	414216	378690	2.65801	Inf	3	1
161805	71844	chr9	chr4	90020000	32470000	1622460000	720400000	ENSG00000130222	ENSG00000169851	ENSG00000130222_ENSG00000169851	ENSG00000169851_ENSG00000130222	GADD45G	PCDH7	89605784	30933610	414216	1536390	2.65801	Inf	3	1
161805	86574	chr9	chr4	90020000	179770000	1622460000	867700000	ENSG00000130222	ENSG00000038002	ENSG00000130222_ENSG00000038002	ENSG00000038002_ENSG00000130222	GADD45G	AGA	89605784	177436606	414216	2333394	2.65801	Inf	3	1
161805	89134	chr9	chr5	90020000	16150000	1622460000	893790000	ENSG00000130222	ENSG00000183654	ENSG00000130222_ENSG00000183654	ENSG00000183654_ENSG00000130222	GADD45G	2021-03-11	89605784	16123950	414216	26050	2.65801	Inf	3	1
161805	89828	chr9	chr5	90020000	23090000	1622460000	900730000	ENSG00000130222	ENSG00000164256	ENSG00000130222_ENSG00000164256	ENSG00000164256_ENSG00000130222	GADD45G	PRDM9	89605784	23486092	414216	-396092	2.65801	Inf	3	1
161805	101840	chr9	chr5	90020000	143210000	1622460000	1020850000	ENSG00000130222	ENSG00000113580	ENSG00000130222_ENSG00000113580	ENSG00000113580_ENSG00000130222	GADD45G	NR3C1	89605784	143356722	414216	-146722	2.65801	Inf	3	1
161805	106738	chr9	chr6	90020000	11650000	1622460000	1070320000	ENSG00000130222	ENSG00000205269	ENSG00000130222_ENSG00000205269	ENSG00000205269_ENSG00000130222	GADD45G	TMEM170B	89605784	11560636	414216	89364	2.65801	Inf	3	1
161805	106747	chr9	chr6	90020000	11740000	1622460000	1070410000	ENSG00000130222	ENSG00000111863	ENSG00000130222_ENSG00000111863	ENSG00000111863_ENSG00000130222	GADD45G	ADTRP	89605784	11759550	414216	-19550	2.65801	Inf	3	1
161805	120362	chr9	chr6	90020000	147890000	1622460000	1206560000	ENSG00000130222	ENSG00000203727	ENSG00000130222_ENSG00000203727	ENSG00000203727_ENSG00000130222	GADD45G	SAMD5	89605784	147623118	414216	266882	2.65801	Inf	3	1
161805	123939	chr9	chr7	90020000	13850000	1622460000	1242820000	ENSG00000130222	ENSG00000006468	ENSG00000130222_ENSG00000006468	ENSG00000006468_ENSG00000130222	GADD45G	ETV1	89605784	13941327	414216	-91327	2.65801	Inf	3	1
161805	132908	chr9	chr7	90020000	103540000	1622460000	1332510000	ENSG00000130222	ENSG00000170615	ENSG00000130222_ENSG00000170615	ENSG00000170615_ENSG00000130222	GADD45G	SLC26A5	89605784	103399454	414216	140546	2.65801	Inf	3	1
161805	133680	chr9	chr7	90020000	111260000	1622460000	1340230000	ENSG00000130222	ENSG00000184903	ENSG00000130222_ENSG00000184903	ENSG00000184903_ENSG00000130222	GADD45G	IMMP2L	89605784	111112784	414216	147216	2.65801	Inf	3	1
161805	134494	chr9	chr7	90020000	119400000	1622460000	1348370000	ENSG00000130222	ENSG00000106013	ENSG00000130222_ENSG00000106013	ENSG00000106013_ENSG00000130222	GADD45G	ANKRD7	89605784	118355420	414216	1044580	2.65801	Inf	3	1
161805	134851	chr9	chr7	90020000	122970000	1622460000	1351940000	ENSG00000130222	ENSG00000128519	ENSG00000130222_ENSG00000128519	ENSG00000128519_ENSG00000130222	GADD45G	TAS2R16	89605784	122995202	414216	-25202	2.65801	Inf	3	1
161805	137147	chr9	chr7	90020000	145930000	1622460000	1374900000	ENSG00000130222	ENSG00000196511	ENSG00000130222_ENSG00000196511	ENSG00000196511_ENSG00000130222	GADD45G	TPK1	89605784	144644168	414216	1285832	2.65801	Inf	3	1
161805	139179	chr9	chr8	90020000	7900000	1622460000	1395710000	ENSG00000130222	ENSG00000171711	ENSG00000130222_ENSG00000171711	ENSG00000171711_ENSG00000130222	GADD45G	DEFB4A	89605784	7895670	414216	4330	2.65801	Inf	3	1
161805	147985	chr9	chr8	90020000	95960000	1622460000	1483770000	ENSG00000130222	ENSG00000156466	ENSG00000130222_ENSG00000156466	ENSG00000156466_ENSG00000130222	GADD45G	GDF6	89605784	96151570	414216	-191570	2.65801	Inf	3	1
161805	152113	chr9	chr8	90020000	137240000	1622460000	1525050000	ENSG00000130222	ENSG00000147724	ENSG00000130222_ENSG00000147724	ENSG00000147724_ENSG00000130222	GADD45G	FAM135B	89605784	138313642	414216	-1073642	2.65801	Inf	3	1
161805	160196	chr9	chr9	90020000	73930000	1622460000	1606370000	ENSG00000130222	ENSG00000198963	ENSG00000130222_ENSG00000198963	ENSG00000198963_ENSG00000130222	GADD45G	RORB	89605784	74595256	414216	-665256	2.65801	Inf	3	1
161805	160498	chr9	chr9	90020000	76950000	1622460000	1609390000	ENSG00000130222	ENSG00000204612	ENSG00000130222_ENSG00000204612	ENSG00000204612_ENSG00000130222	GADD45G	FOXB2	89605784	77020304	414216	-70304	2.65801	Inf	3	1
162022	4647	chr9	chr1	92190000	46960000	1624630000	46960000	ENSG00000196305	ENSG00000187048	ENSG00000196305_ENSG00000187048	ENSG00000187048_ENSG00000196305	IARS	CYP4A11	92251982	46935330	-61982	24670	2.65801	Inf	3	1
162022	16334	chr9	chr1	92190000	163830000	1624630000	163830000	ENSG00000196305	ENSG00000143228	ENSG00000196305_ENSG00000143228	ENSG00000143228_ENSG00000196305	IARS	NUF2	92251982	163311170	-61982	518830	2.65801	Inf	3	1
162022	16721	chr9	chr1	92190000	167700000	1624630000	167700000	ENSG00000196305	ENSG00000198771	ENSG00000196305_ENSG00000198771	ENSG00000198771_ENSG00000196305	IARS	RCSD1	92251982	167669394	-61982	30606	2.65801	Inf	3	1
162022	17056	chr9	chr1	92190000	171050000	1624630000	171050000	ENSG00000196305	ENSG00000117501	ENSG00000196305_ENSG00000117501	ENSG00000117501_ENSG00000196305	IARS	MROH9	92251982	171000118	-61982	49882	2.65801	Inf	3	1
162022	17058	chr9	chr1	92190000	171070000	1624630000	171070000	ENSG00000196305	ENSG00000007933	ENSG00000196305_ENSG00000007933	ENSG00000007933_ENSG00000196305	IARS	FMO3	92251982	171104360	-61982	-34360	2.65801	Inf	3	1
162022	21854	chr9	chr1	92190000	219030000	1624630000	219030000	ENSG00000196305	ENSG00000143353	ENSG00000196305_ENSG00000143353	ENSG00000143353_ENSG00000196305	IARS	LYPLAL1	92251982	219193367	-61982	-163367	2.65801	Inf	3	1
162022	25228	chr9	chr2	92190000	4810000	1624630000	253260000	ENSG00000196305	ENSG00000176887	ENSG00000196305_ENSG00000176887	ENSG00000176887_ENSG00000196305	IARS	SOX11	92251982	5696884	-61982	-886884	2.65801	Inf	3	1
162022	50034	chr9	chr3	92190000	11670000	1624630000	501810000	ENSG00000196305	ENSG00000144560	ENSG00000196305_ENSG00000144560	ENSG00000144560_ENSG00000196305	IARS	VGLL4	92251982	11663710	-61982	6290	2.65801	Inf	3	1
162022	50058	chr9	chr3	92190000	11910000	1624630000	502050000	ENSG00000196305	ENSG00000144559	ENSG00000196305_ENSG00000144559	ENSG00000144559_ENSG00000196305	IARS	TAMM41	92251982	11818680	-61982	91320	2.65801	Inf	3	1
162022	51748	chr9	chr3	92190000	28810000	1624630000	518950000	ENSG00000196305	ENSG00000283563	ENSG00000196305_ENSG00000283563	ENSG00000283563_ENSG00000196305	IARS	AC098650.1	92251982	29058358	-61982	-248358	2.65801	Inf	3	1
162022	52175	chr9	chr3	92190000	33080000	1624630000	523220000	ENSG00000196305	ENSG00000188167	ENSG00000196305_ENSG00000188167	ENSG00000188167_ENSG00000196305	IARS	TMPPE	92251982	33093784	-61982	-13784	2.65801	Inf	3	1
162022	63247	chr9	chr3	92190000	143800000	1624630000	633940000	ENSG00000196305	ENSG00000181744	ENSG00000196305_ENSG00000181744	ENSG00000181744_ENSG00000196305	IARS	DIPK2A	92251982	144010258	-61982	-210258	2.65801	Inf	3	1
162022	68051	chr9	chr3	92190000	191840000	1624630000	681980000	ENSG00000196305	ENSG00000253548	ENSG00000196305_ENSG00000253548	ENSG00000253548_ENSG00000196305	IARS	PYDC2	92251982	191461310	-61982	378690	2.65801	Inf	3	1
162022	71844	chr9	chr4	92190000	32470000	1624630000	720400000	ENSG00000196305	ENSG00000169851	ENSG00000196305_ENSG00000169851	ENSG00000169851_ENSG00000196305	IARS	PCDH7	92251982	30933610	-61982	1536390	2.65801	Inf	3	1
162022	86574	chr9	chr4	92190000	179770000	1624630000	867700000	ENSG00000196305	ENSG00000038002	ENSG00000196305_ENSG00000038002	ENSG00000038002_ENSG00000196305	IARS	AGA	92251982	177436606	-61982	2333394	2.65801	Inf	3	1
162022	89134	chr9	chr5	92190000	16150000	1624630000	893790000	ENSG00000196305	ENSG00000183654	ENSG00000196305_ENSG00000183654	ENSG00000183654_ENSG00000196305	IARS	2021-03-11	92251982	16123950	-61982	26050	2.65801	Inf	3	1
162022	89828	chr9	chr5	92190000	23090000	1624630000	900730000	ENSG00000196305	ENSG00000164256	ENSG00000196305_ENSG00000164256	ENSG00000164256_ENSG00000196305	IARS	PRDM9	92251982	23486092	-61982	-396092	2.65801	Inf	3	1
162022	101840	chr9	chr5	92190000	143210000	1624630000	1020850000	ENSG00000196305	ENSG00000113580	ENSG00000196305_ENSG00000113580	ENSG00000113580_ENSG00000196305	IARS	NR3C1	92251982	143356722	-61982	-146722	2.65801	Inf	3	1
162022	106738	chr9	chr6	92190000	11650000	1624630000	1070320000	ENSG00000196305	ENSG00000205269	ENSG00000196305_ENSG00000205269	ENSG00000205269_ENSG00000196305	IARS	TMEM170B	92251982	11560636	-61982	89364	2.65801	Inf	3	1
162022	106747	chr9	chr6	92190000	11740000	1624630000	1070410000	ENSG00000196305	ENSG00000111863	ENSG00000196305_ENSG00000111863	ENSG00000111863_ENSG00000196305	IARS	ADTRP	92251982	11759550	-61982	-19550	2.65801	Inf	3	1
162022	120362	chr9	chr6	92190000	147890000	1624630000	1206560000	ENSG00000196305	ENSG00000203727	ENSG00000196305_ENSG00000203727	ENSG00000203727_ENSG00000196305	IARS	SAMD5	92251982	147623118	-61982	266882	2.65801	Inf	3	1
162022	123939	chr9	chr7	92190000	13850000	1624630000	1242820000	ENSG00000196305	ENSG00000006468	ENSG00000196305_ENSG00000006468	ENSG00000006468_ENSG00000196305	IARS	ETV1	92251982	13941327	-61982	-91327	2.65801	Inf	3	1
162022	132908	chr9	chr7	92190000	103540000	1624630000	1332510000	ENSG00000196305	ENSG00000170615	ENSG00000196305_ENSG00000170615	ENSG00000170615_ENSG00000196305	IARS	SLC26A5	92251982	103399454	-61982	140546	2.65801	Inf	3	1
162022	133680	chr9	chr7	92190000	111260000	1624630000	1340230000	ENSG00000196305	ENSG00000184903	ENSG00000196305_ENSG00000184903	ENSG00000184903_ENSG00000196305	IARS	IMMP2L	92251982	111112784	-61982	147216	2.65801	Inf	3	1
162022	134494	chr9	chr7	92190000	119400000	1624630000	1348370000	ENSG00000196305	ENSG00000106013	ENSG00000196305_ENSG00000106013	ENSG00000106013_ENSG00000196305	IARS	ANKRD7	92251982	118355420	-61982	1044580	2.65801	Inf	3	1
162022	134851	chr9	chr7	92190000	122970000	1624630000	1351940000	ENSG00000196305	ENSG00000128519	ENSG00000196305_ENSG00000128519	ENSG00000128519_ENSG00000196305	IARS	TAS2R16	92251982	122995202	-61982	-25202	2.65801	Inf	3	1
162022	137147	chr9	chr7	92190000	145930000	1624630000	1374900000	ENSG00000196305	ENSG00000196511	ENSG00000196305_ENSG00000196511	ENSG00000196511_ENSG00000196305	IARS	TPK1	92251982	144644168	-61982	1285832	2.65801	Inf	3	1
162022	139179	chr9	chr8	92190000	7900000	1624630000	1395710000	ENSG00000196305	ENSG00000171711	ENSG00000196305_ENSG00000171711	ENSG00000171711_ENSG00000196305	IARS	DEFB4A	92251982	7895670	-61982	4330	2.65801	Inf	3	1
162022	147985	chr9	chr8	92190000	95960000	1624630000	1483770000	ENSG00000196305	ENSG00000156466	ENSG00000196305_ENSG00000156466	ENSG00000156466_ENSG00000196305	IARS	GDF6	92251982	96151570	-61982	-191570	2.65801	Inf	3	1
162022	152113	chr9	chr8	92190000	137240000	1624630000	1525050000	ENSG00000196305	ENSG00000147724	ENSG00000196305_ENSG00000147724	ENSG00000147724_ENSG00000196305	IARS	FAM135B	92251982	138313642	-61982	-1073642	2.65801	Inf	3	1
162022	160196	chr9	chr9	92190000	73930000	1624630000	1606370000	ENSG00000196305	ENSG00000198963	ENSG00000196305_ENSG00000198963	ENSG00000198963_ENSG00000196305	IARS	RORB	92251982	74595256	-61982	-665256	2.65801	Inf	3	1
162022	160498	chr9	chr9	92190000	76950000	1624630000	1609390000	ENSG00000196305	ENSG00000204612	ENSG00000196305_ENSG00000204612	ENSG00000204612_ENSG00000196305	IARS	FOXB2	92251982	77020304	-61982	-70304	2.65801	Inf	3	1
164860	4647	chr9	chr1	120570000	46960000	1653010000	46960000	ENSG00000136861	ENSG00000187048	ENSG00000136861_ENSG00000187048	ENSG00000187048_ENSG00000136861	CDK5RAP2	CYP4A11	120484520	46935330	85480	24670	2.65801	Inf	3	1
164860	16334	chr9	chr1	120570000	163830000	1653010000	163830000	ENSG00000136861	ENSG00000143228	ENSG00000136861_ENSG00000143228	ENSG00000143228_ENSG00000136861	CDK5RAP2	NUF2	120484520	163311170	85480	518830	2.65801	Inf	3	1
164860	16721	chr9	chr1	120570000	167700000	1653010000	167700000	ENSG00000136861	ENSG00000198771	ENSG00000136861_ENSG00000198771	ENSG00000198771_ENSG00000136861	CDK5RAP2	RCSD1	120484520	167669394	85480	30606	2.65801	Inf	3	1
164860	17056	chr9	chr1	120570000	171050000	1653010000	171050000	ENSG00000136861	ENSG00000117501	ENSG00000136861_ENSG00000117501	ENSG00000117501_ENSG00000136861	CDK5RAP2	MROH9	120484520	171000118	85480	49882	2.65801	Inf	3	1
164860	17058	chr9	chr1	120570000	171070000	1653010000	171070000	ENSG00000136861	ENSG00000007933	ENSG00000136861_ENSG00000007933	ENSG00000007933_ENSG00000136861	CDK5RAP2	FMO3	120484520	171104360	85480	-34360	2.65801	Inf	3	1
164860	21854	chr9	chr1	120570000	219030000	1653010000	219030000	ENSG00000136861	ENSG00000143353	ENSG00000136861_ENSG00000143353	ENSG00000143353_ENSG00000136861	CDK5RAP2	LYPLAL1	120484520	219193367	85480	-163367	2.65801	Inf	3	1
164860	25228	chr9	chr2	120570000	4810000	1653010000	253260000	ENSG00000136861	ENSG00000176887	ENSG00000136861_ENSG00000176887	ENSG00000176887_ENSG00000136861	CDK5RAP2	SOX11	120484520	5696884	85480	-886884	2.65801	Inf	3	1
164860	50034	chr9	chr3	120570000	11670000	1653010000	501810000	ENSG00000136861	ENSG00000144560	ENSG00000136861_ENSG00000144560	ENSG00000144560_ENSG00000136861	CDK5RAP2	VGLL4	120484520	11663710	85480	6290	2.65801	Inf	3	1
164860	50058	chr9	chr3	120570000	11910000	1653010000	502050000	ENSG00000136861	ENSG00000144559	ENSG00000136861_ENSG00000144559	ENSG00000144559_ENSG00000136861	CDK5RAP2	TAMM41	120484520	11818680	85480	91320	2.65801	Inf	3	1
164860	51748	chr9	chr3	120570000	28810000	1653010000	518950000	ENSG00000136861	ENSG00000283563	ENSG00000136861_ENSG00000283563	ENSG00000283563_ENSG00000136861	CDK5RAP2	AC098650.1	120484520	29058358	85480	-248358	2.65801	Inf	3	1
164860	52175	chr9	chr3	120570000	33080000	1653010000	523220000	ENSG00000136861	ENSG00000188167	ENSG00000136861_ENSG00000188167	ENSG00000188167_ENSG00000136861	CDK5RAP2	TMPPE	120484520	33093784	85480	-13784	2.65801	Inf	3	1
164860	63247	chr9	chr3	120570000	143800000	1653010000	633940000	ENSG00000136861	ENSG00000181744	ENSG00000136861_ENSG00000181744	ENSG00000181744_ENSG00000136861	CDK5RAP2	DIPK2A	120484520	144010258	85480	-210258	2.65801	Inf	3	1
164860	68051	chr9	chr3	120570000	191840000	1653010000	681980000	ENSG00000136861	ENSG00000253548	ENSG00000136861_ENSG00000253548	ENSG00000253548_ENSG00000136861	CDK5RAP2	PYDC2	120484520	191461310	85480	378690	2.65801	Inf	3	1
164860	71844	chr9	chr4	120570000	32470000	1653010000	720400000	ENSG00000136861	ENSG00000169851	ENSG00000136861_ENSG00000169851	ENSG00000169851_ENSG00000136861	CDK5RAP2	PCDH7	120484520	30933610	85480	1536390	2.65801	Inf	3	1
164860	86574	chr9	chr4	120570000	179770000	1653010000	867700000	ENSG00000136861	ENSG00000038002	ENSG00000136861_ENSG00000038002	ENSG00000038002_ENSG00000136861	CDK5RAP2	AGA	120484520	177436606	85480	2333394	2.65801	Inf	3	1
164860	89134	chr9	chr5	120570000	16150000	1653010000	893790000	ENSG00000136861	ENSG00000183654	ENSG00000136861_ENSG00000183654	ENSG00000183654_ENSG00000136861	CDK5RAP2	2021-03-11	120484520	16123950	85480	26050	2.65801	Inf	3	1
164860	89828	chr9	chr5	120570000	23090000	1653010000	900730000	ENSG00000136861	ENSG00000164256	ENSG00000136861_ENSG00000164256	ENSG00000164256_ENSG00000136861	CDK5RAP2	PRDM9	120484520	23486092	85480	-396092	2.65801	Inf	3	1
164860	101840	chr9	chr5	120570000	143210000	1653010000	1020850000	ENSG00000136861	ENSG00000113580	ENSG00000136861_ENSG00000113580	ENSG00000113580_ENSG00000136861	CDK5RAP2	NR3C1	120484520	143356722	85480	-146722	2.65801	Inf	3	1
164860	106738	chr9	chr6	120570000	11650000	1653010000	1070320000	ENSG00000136861	ENSG00000205269	ENSG00000136861_ENSG00000205269	ENSG00000205269_ENSG00000136861	CDK5RAP2	TMEM170B	120484520	11560636	85480	89364	2.65801	Inf	3	1
164860	106747	chr9	chr6	120570000	11740000	1653010000	1070410000	ENSG00000136861	ENSG00000111863	ENSG00000136861_ENSG00000111863	ENSG00000111863_ENSG00000136861	CDK5RAP2	ADTRP	120484520	11759550	85480	-19550	2.65801	Inf	3	1
164860	120362	chr9	chr6	120570000	147890000	1653010000	1206560000	ENSG00000136861	ENSG00000203727	ENSG00000136861_ENSG00000203727	ENSG00000203727_ENSG00000136861	CDK5RAP2	SAMD5	120484520	147623118	85480	266882	2.65801	Inf	3	1
164860	123939	chr9	chr7	120570000	13850000	1653010000	1242820000	ENSG00000136861	ENSG00000006468	ENSG00000136861_ENSG00000006468	ENSG00000006468_ENSG00000136861	CDK5RAP2	ETV1	120484520	13941327	85480	-91327	2.65801	Inf	3	1
164860	132908	chr9	chr7	120570000	103540000	1653010000	1332510000	ENSG00000136861	ENSG00000170615	ENSG00000136861_ENSG00000170615	ENSG00000170615_ENSG00000136861	CDK5RAP2	SLC26A5	120484520	103399454	85480	140546	2.65801	Inf	3	1
164860	133680	chr9	chr7	120570000	111260000	1653010000	1340230000	ENSG00000136861	ENSG00000184903	ENSG00000136861_ENSG00000184903	ENSG00000184903_ENSG00000136861	CDK5RAP2	IMMP2L	120484520	111112784	85480	147216	2.65801	Inf	3	1
164860	134494	chr9	chr7	120570000	119400000	1653010000	1348370000	ENSG00000136861	ENSG00000106013	ENSG00000136861_ENSG00000106013	ENSG00000106013_ENSG00000136861	CDK5RAP2	ANKRD7	120484520	118355420	85480	1044580	2.65801	Inf	3	1
164860	134851	chr9	chr7	120570000	122970000	1653010000	1351940000	ENSG00000136861	ENSG00000128519	ENSG00000136861_ENSG00000128519	ENSG00000128519_ENSG00000136861	CDK5RAP2	TAS2R16	120484520	122995202	85480	-25202	2.65801	Inf	3	1
164860	137147	chr9	chr7	120570000	145930000	1653010000	1374900000	ENSG00000136861	ENSG00000196511	ENSG00000136861_ENSG00000196511	ENSG00000196511_ENSG00000136861	CDK5RAP2	TPK1	120484520	144644168	85480	1285832	2.65801	Inf	3	1
164860	139179	chr9	chr8	120570000	7900000	1653010000	1395710000	ENSG00000136861	ENSG00000171711	ENSG00000136861_ENSG00000171711	ENSG00000171711_ENSG00000136861	CDK5RAP2	DEFB4A	120484520	7895670	85480	4330	2.65801	Inf	3	1
164860	147985	chr9	chr8	120570000	95960000	1653010000	1483770000	ENSG00000136861	ENSG00000156466	ENSG00000136861_ENSG00000156466	ENSG00000156466_ENSG00000136861	CDK5RAP2	GDF6	120484520	96151570	85480	-191570	2.65801	Inf	3	1
164860	152113	chr9	chr8	120570000	137240000	1653010000	1525050000	ENSG00000136861	ENSG00000147724	ENSG00000136861_ENSG00000147724	ENSG00000147724_ENSG00000136861	CDK5RAP2	FAM135B	120484520	138313642	85480	-1073642	2.65801	Inf	3	1
164860	160196	chr9	chr9	120570000	73930000	1653010000	1606370000	ENSG00000136861	ENSG00000198963	ENSG00000136861_ENSG00000198963	ENSG00000198963_ENSG00000136861	CDK5RAP2	RORB	120484520	74595256	85480	-665256	2.65801	Inf	3	1
164860	160498	chr9	chr9	120570000	76950000	1653010000	1609390000	ENSG00000136861	ENSG00000204612	ENSG00000136861_ENSG00000204612	ENSG00000204612_ENSG00000136861	CDK5RAP2	FOXB2	120484520	77020304	85480	-70304	2.65801	Inf	3	1
164860	161805	chr9	chr9	120570000	90020000	1653010000	1622460000	ENSG00000136861	ENSG00000130222	ENSG00000136861_ENSG00000130222	ENSG00000130222_ENSG00000136861	CDK5RAP2	GADD45G	120484520	89605784	85480	414216	2.65801	Inf	3	1
164860	162022	chr9	chr9	120570000	92190000	1653010000	1624630000	ENSG00000136861	ENSG00000196305	ENSG00000136861_ENSG00000196305	ENSG00000196305_ENSG00000136861	CDK5RAP2	IARS	120484520	92251982	85480	-61982	2.65801	Inf	3	1
165710	32891	chr9	chr2	129070000	81440000	1661510000	329890000	ENSG00000148343	ENSG00000162951	ENSG00000148343_ENSG00000162951	ENSG00000162951_ENSG00000148343	MIGA2	LRRTM1	129054352	80296552	15648	1143448	3.13513	Inf	4	0
165710	56563	chr9	chr3	129070000	76960000	1661510000	567100000	ENSG00000148343	ENSG00000185008	ENSG00000148343_ENSG00000185008	ENSG00000185008_ENSG00000148343	MIGA2	ROBO2	129054352	76778330	15648	181670	3.13513	Inf	4	0
165710	117724	chr9	chr6	129070000	121510000	1661510000	1180180000	ENSG00000148343	ENSG00000152661	ENSG00000148343_ENSG00000152661	ENSG00000152661_ENSG00000148343	MIGA2	GJA1	129054352	121442661	15648	67339	3.13513	Inf	4	0
168641	51451	chr10	chr3	20980000	25840000	1691310000	515980000	ENSG00000078114	ENSG00000151093	ENSG00000078114_ENSG00000151093	ENSG00000151093_ENSG00000078114	NEBL	OXSM	20977080	25788726	2920	51274	3.13513	Inf	4	0
168641	108346	chr10	chr6	20980000	27730000	1691310000	1086400000	ENSG00000078114	ENSG00000185130	ENSG00000078114_ENSG00000185130	ENSG00000185130_ENSG00000078114	NEBL	HIST1H2BL	20977080	27807688	2920	-77688	3.13513	Inf	4	0
168650	51451	chr10	chr3	21070000	25840000	1691400000	515980000	ENSG00000204683	ENSG00000151093	ENSG00000204683_ENSG00000151093	ENSG00000151093_ENSG00000204683	C10orf113	OXSM	21136161	25788726	-66161	51274	3.13513	Inf	4	0
168650	108346	chr10	chr6	21070000	27730000	1691400000	1086400000	ENSG00000204683	ENSG00000185130	ENSG00000204683_ENSG00000185130	ENSG00000185130_ENSG00000204683	C10orf113	HIST1H2BL	21136161	27807688	-66161	-77688	3.13513	Inf	4	0
173040	4647	chr10	chr1	64970000	46960000	1735300000	46960000	ENSG00000165476	ENSG00000187048	ENSG00000165476_ENSG00000187048	ENSG00000187048_ENSG00000165476	REEP3	CYP4A11	63573264	46935330	1396736	24670	2.65801	Inf	3	1
173040	16334	chr10	chr1	64970000	163830000	1735300000	163830000	ENSG00000165476	ENSG00000143228	ENSG00000165476_ENSG00000143228	ENSG00000143228_ENSG00000165476	REEP3	NUF2	63573264	163311170	1396736	518830	2.65801	Inf	3	1
173040	16721	chr10	chr1	64970000	167700000	1735300000	167700000	ENSG00000165476	ENSG00000198771	ENSG00000165476_ENSG00000198771	ENSG00000198771_ENSG00000165476	REEP3	RCSD1	63573264	167669394	1396736	30606	2.65801	Inf	3	1
173040	17056	chr10	chr1	64970000	171050000	1735300000	171050000	ENSG00000165476	ENSG00000117501	ENSG00000165476_ENSG00000117501	ENSG00000117501_ENSG00000165476	REEP3	MROH9	63573264	171000118	1396736	49882	2.65801	Inf	3	1
173040	17058	chr10	chr1	64970000	171070000	1735300000	171070000	ENSG00000165476	ENSG00000007933	ENSG00000165476_ENSG00000007933	ENSG00000007933_ENSG00000165476	REEP3	FMO3	63573264	171104360	1396736	-34360	2.65801	Inf	3	1
173040	21854	chr10	chr1	64970000	219030000	1735300000	219030000	ENSG00000165476	ENSG00000143353	ENSG00000165476_ENSG00000143353	ENSG00000143353_ENSG00000165476	REEP3	LYPLAL1	63573264	219193367	1396736	-163367	2.65801	Inf	3	1
173040	25228	chr10	chr2	64970000	4810000	1735300000	253260000	ENSG00000165476	ENSG00000176887	ENSG00000165476_ENSG00000176887	ENSG00000176887_ENSG00000165476	REEP3	SOX11	63573264	5696884	1396736	-886884	2.65801	Inf	3	1
173040	50034	chr10	chr3	64970000	11670000	1735300000	501810000	ENSG00000165476	ENSG00000144560	ENSG00000165476_ENSG00000144560	ENSG00000144560_ENSG00000165476	REEP3	VGLL4	63573264	11663710	1396736	6290	2.65801	Inf	3	1
173040	50058	chr10	chr3	64970000	11910000	1735300000	502050000	ENSG00000165476	ENSG00000144559	ENSG00000165476_ENSG00000144559	ENSG00000144559_ENSG00000165476	REEP3	TAMM41	63573264	11818680	1396736	91320	2.65801	Inf	3	1
173040	51748	chr10	chr3	64970000	28810000	1735300000	518950000	ENSG00000165476	ENSG00000283563	ENSG00000165476_ENSG00000283563	ENSG00000283563_ENSG00000165476	REEP3	AC098650.1	63573264	29058358	1396736	-248358	2.65801	Inf	3	1
173040	52175	chr10	chr3	64970000	33080000	1735300000	523220000	ENSG00000165476	ENSG00000188167	ENSG00000165476_ENSG00000188167	ENSG00000188167_ENSG00000165476	REEP3	TMPPE	63573264	33093784	1396736	-13784	2.65801	Inf	3	1
173040	63247	chr10	chr3	64970000	143800000	1735300000	633940000	ENSG00000165476	ENSG00000181744	ENSG00000165476_ENSG00000181744	ENSG00000181744_ENSG00000165476	REEP3	DIPK2A	63573264	144010258	1396736	-210258	2.65801	Inf	3	1
173040	68051	chr10	chr3	64970000	191840000	1735300000	681980000	ENSG00000165476	ENSG00000253548	ENSG00000165476_ENSG00000253548	ENSG00000253548_ENSG00000165476	REEP3	PYDC2	63573264	191461310	1396736	378690	2.65801	Inf	3	1
173040	71844	chr10	chr4	64970000	32470000	1735300000	720400000	ENSG00000165476	ENSG00000169851	ENSG00000165476_ENSG00000169851	ENSG00000169851_ENSG00000165476	REEP3	PCDH7	63573264	30933610	1396736	1536390	2.65801	Inf	3	1
173040	86574	chr10	chr4	64970000	179770000	1735300000	867700000	ENSG00000165476	ENSG00000038002	ENSG00000165476_ENSG00000038002	ENSG00000038002_ENSG00000165476	REEP3	AGA	63573264	177436606	1396736	2333394	2.65801	Inf	3	1
173040	89134	chr10	chr5	64970000	16150000	1735300000	893790000	ENSG00000165476	ENSG00000183654	ENSG00000165476_ENSG00000183654	ENSG00000183654_ENSG00000165476	REEP3	2021-03-11	63573264	16123950	1396736	26050	2.65801	Inf	3	1
173040	89828	chr10	chr5	64970000	23090000	1735300000	900730000	ENSG00000165476	ENSG00000164256	ENSG00000165476_ENSG00000164256	ENSG00000164256_ENSG00000165476	REEP3	PRDM9	63573264	23486092	1396736	-396092	2.65801	Inf	3	1
173040	101840	chr10	chr5	64970000	143210000	1735300000	1020850000	ENSG00000165476	ENSG00000113580	ENSG00000165476_ENSG00000113580	ENSG00000113580_ENSG00000165476	REEP3	NR3C1	63573264	143356722	1396736	-146722	2.65801	Inf	3	1
173040	106738	chr10	chr6	64970000	11650000	1735300000	1070320000	ENSG00000165476	ENSG00000205269	ENSG00000165476_ENSG00000205269	ENSG00000205269_ENSG00000165476	REEP3	TMEM170B	63573264	11560636	1396736	89364	2.65801	Inf	3	1
173040	106747	chr10	chr6	64970000	11740000	1735300000	1070410000	ENSG00000165476	ENSG00000111863	ENSG00000165476_ENSG00000111863	ENSG00000111863_ENSG00000165476	REEP3	ADTRP	63573264	11759550	1396736	-19550	2.65801	Inf	3	1
173040	120362	chr10	chr6	64970000	147890000	1735300000	1206560000	ENSG00000165476	ENSG00000203727	ENSG00000165476_ENSG00000203727	ENSG00000203727_ENSG00000165476	REEP3	SAMD5	63573264	147623118	1396736	266882	2.65801	Inf	3	1
173040	123939	chr10	chr7	64970000	13850000	1735300000	1242820000	ENSG00000165476	ENSG00000006468	ENSG00000165476_ENSG00000006468	ENSG00000006468_ENSG00000165476	REEP3	ETV1	63573264	13941327	1396736	-91327	2.65801	Inf	3	1
173040	132908	chr10	chr7	64970000	103540000	1735300000	1332510000	ENSG00000165476	ENSG00000170615	ENSG00000165476_ENSG00000170615	ENSG00000170615_ENSG00000165476	REEP3	SLC26A5	63573264	103399454	1396736	140546	2.65801	Inf	3	1
173040	133680	chr10	chr7	64970000	111260000	1735300000	1340230000	ENSG00000165476	ENSG00000184903	ENSG00000165476_ENSG00000184903	ENSG00000184903_ENSG00000165476	REEP3	IMMP2L	63573264	111112784	1396736	147216	2.65801	Inf	3	1
173040	134494	chr10	chr7	64970000	119400000	1735300000	1348370000	ENSG00000165476	ENSG00000106013	ENSG00000165476_ENSG00000106013	ENSG00000106013_ENSG00000165476	REEP3	ANKRD7	63573264	118355420	1396736	1044580	2.65801	Inf	3	1
173040	134851	chr10	chr7	64970000	122970000	1735300000	1351940000	ENSG00000165476	ENSG00000128519	ENSG00000165476_ENSG00000128519	ENSG00000128519_ENSG00000165476	REEP3	TAS2R16	63573264	122995202	1396736	-25202	2.65801	Inf	3	1
173040	137147	chr10	chr7	64970000	145930000	1735300000	1374900000	ENSG00000165476	ENSG00000196511	ENSG00000165476_ENSG00000196511	ENSG00000196511_ENSG00000165476	REEP3	TPK1	63573264	144644168	1396736	1285832	2.65801	Inf	3	1
173040	139179	chr10	chr8	64970000	7900000	1735300000	1395710000	ENSG00000165476	ENSG00000171711	ENSG00000165476_ENSG00000171711	ENSG00000171711_ENSG00000165476	REEP3	DEFB4A	63573264	7895670	1396736	4330	2.65801	Inf	3	1
173040	147985	chr10	chr8	64970000	95960000	1735300000	1483770000	ENSG00000165476	ENSG00000156466	ENSG00000165476_ENSG00000156466	ENSG00000156466_ENSG00000165476	REEP3	GDF6	63573264	96151570	1396736	-191570	2.65801	Inf	3	1
173040	152113	chr10	chr8	64970000	137240000	1735300000	1525050000	ENSG00000165476	ENSG00000147724	ENSG00000165476_ENSG00000147724	ENSG00000147724_ENSG00000165476	REEP3	FAM135B	63573264	138313642	1396736	-1073642	2.65801	Inf	3	1
173040	160196	chr10	chr9	64970000	73930000	1735300000	1606370000	ENSG00000165476	ENSG00000198963	ENSG00000165476_ENSG00000198963	ENSG00000198963_ENSG00000165476	REEP3	RORB	63573264	74595256	1396736	-665256	2.65801	Inf	3	1
173040	160498	chr10	chr9	64970000	76950000	1735300000	1609390000	ENSG00000165476	ENSG00000204612	ENSG00000165476_ENSG00000204612	ENSG00000204612_ENSG00000165476	REEP3	FOXB2	63573264	77020304	1396736	-70304	2.65801	Inf	3	1
173040	161805	chr10	chr9	64970000	90020000	1735300000	1622460000	ENSG00000165476	ENSG00000130222	ENSG00000165476_ENSG00000130222	ENSG00000130222_ENSG00000165476	REEP3	GADD45G	63573264	89605784	1396736	414216	2.65801	Inf	3	1
173040	162022	chr10	chr9	64970000	92190000	1735300000	1624630000	ENSG00000165476	ENSG00000196305	ENSG00000165476_ENSG00000196305	ENSG00000196305_ENSG00000165476	REEP3	IARS	63573264	92251982	1396736	-61982	2.65801	Inf	3	1
173040	164860	chr10	chr9	64970000	120570000	1735300000	1653010000	ENSG00000165476	ENSG00000136861	ENSG00000165476_ENSG00000136861	ENSG00000136861_ENSG00000165476	REEP3	CDK5RAP2	63573264	120484520	1396736	85480	2.65801	Inf	3	1
173126	4647	chr10	chr1	65830000	46960000	1736160000	46960000	ENSG00000183230	ENSG00000187048	ENSG00000183230_ENSG00000187048	ENSG00000187048_ENSG00000183230	CTNNA3	CYP4A11	66804359	46935330	-974359	24670	2.65801	Inf	3	1
173126	16334	chr10	chr1	65830000	163830000	1736160000	163830000	ENSG00000183230	ENSG00000143228	ENSG00000183230_ENSG00000143228	ENSG00000143228_ENSG00000183230	CTNNA3	NUF2	66804359	163311170	-974359	518830	2.65801	Inf	3	1
173126	16721	chr10	chr1	65830000	167700000	1736160000	167700000	ENSG00000183230	ENSG00000198771	ENSG00000183230_ENSG00000198771	ENSG00000198771_ENSG00000183230	CTNNA3	RCSD1	66804359	167669394	-974359	30606	2.65801	Inf	3	1
173126	17056	chr10	chr1	65830000	171050000	1736160000	171050000	ENSG00000183230	ENSG00000117501	ENSG00000183230_ENSG00000117501	ENSG00000117501_ENSG00000183230	CTNNA3	MROH9	66804359	171000118	-974359	49882	2.65801	Inf	3	1
173126	17058	chr10	chr1	65830000	171070000	1736160000	171070000	ENSG00000183230	ENSG00000007933	ENSG00000183230_ENSG00000007933	ENSG00000007933_ENSG00000183230	CTNNA3	FMO3	66804359	171104360	-974359	-34360	2.65801	Inf	3	1
173126	21854	chr10	chr1	65830000	219030000	1736160000	219030000	ENSG00000183230	ENSG00000143353	ENSG00000183230_ENSG00000143353	ENSG00000143353_ENSG00000183230	CTNNA3	LYPLAL1	66804359	219193367	-974359	-163367	2.65801	Inf	3	1
173126	25228	chr10	chr2	65830000	4810000	1736160000	253260000	ENSG00000183230	ENSG00000176887	ENSG00000183230_ENSG00000176887	ENSG00000176887_ENSG00000183230	CTNNA3	SOX11	66804359	5696884	-974359	-886884	2.65801	Inf	3	1
173126	50034	chr10	chr3	65830000	11670000	1736160000	501810000	ENSG00000183230	ENSG00000144560	ENSG00000183230_ENSG00000144560	ENSG00000144560_ENSG00000183230	CTNNA3	VGLL4	66804359	11663710	-974359	6290	2.65801	Inf	3	1
173126	50058	chr10	chr3	65830000	11910000	1736160000	502050000	ENSG00000183230	ENSG00000144559	ENSG00000183230_ENSG00000144559	ENSG00000144559_ENSG00000183230	CTNNA3	TAMM41	66804359	11818680	-974359	91320	2.65801	Inf	3	1
173126	51748	chr10	chr3	65830000	28810000	1736160000	518950000	ENSG00000183230	ENSG00000283563	ENSG00000183230_ENSG00000283563	ENSG00000283563_ENSG00000183230	CTNNA3	AC098650.1	66804359	29058358	-974359	-248358	2.65801	Inf	3	1
173126	52175	chr10	chr3	65830000	33080000	1736160000	523220000	ENSG00000183230	ENSG00000188167	ENSG00000183230_ENSG00000188167	ENSG00000188167_ENSG00000183230	CTNNA3	TMPPE	66804359	33093784	-974359	-13784	2.65801	Inf	3	1
173126	63247	chr10	chr3	65830000	143800000	1736160000	633940000	ENSG00000183230	ENSG00000181744	ENSG00000183230_ENSG00000181744	ENSG00000181744_ENSG00000183230	CTNNA3	DIPK2A	66804359	144010258	-974359	-210258	2.65801	Inf	3	1
173126	68051	chr10	chr3	65830000	191840000	1736160000	681980000	ENSG00000183230	ENSG00000253548	ENSG00000183230_ENSG00000253548	ENSG00000253548_ENSG00000183230	CTNNA3	PYDC2	66804359	191461310	-974359	378690	2.65801	Inf	3	1
173126	71844	chr10	chr4	65830000	32470000	1736160000	720400000	ENSG00000183230	ENSG00000169851	ENSG00000183230_ENSG00000169851	ENSG00000169851_ENSG00000183230	CTNNA3	PCDH7	66804359	30933610	-974359	1536390	2.65801	Inf	3	1
173126	86574	chr10	chr4	65830000	179770000	1736160000	867700000	ENSG00000183230	ENSG00000038002	ENSG00000183230_ENSG00000038002	ENSG00000038002_ENSG00000183230	CTNNA3	AGA	66804359	177436606	-974359	2333394	2.65801	Inf	3	1
173126	89134	chr10	chr5	65830000	16150000	1736160000	893790000	ENSG00000183230	ENSG00000183654	ENSG00000183230_ENSG00000183654	ENSG00000183654_ENSG00000183230	CTNNA3	2021-03-11	66804359	16123950	-974359	26050	2.65801	Inf	3	1
173126	89828	chr10	chr5	65830000	23090000	1736160000	900730000	ENSG00000183230	ENSG00000164256	ENSG00000183230_ENSG00000164256	ENSG00000164256_ENSG00000183230	CTNNA3	PRDM9	66804359	23486092	-974359	-396092	2.65801	Inf	3	1
173126	101840	chr10	chr5	65830000	143210000	1736160000	1020850000	ENSG00000183230	ENSG00000113580	ENSG00000183230_ENSG00000113580	ENSG00000113580_ENSG00000183230	CTNNA3	NR3C1	66804359	143356722	-974359	-146722	2.65801	Inf	3	1
173126	106738	chr10	chr6	65830000	11650000	1736160000	1070320000	ENSG00000183230	ENSG00000205269	ENSG00000183230_ENSG00000205269	ENSG00000205269_ENSG00000183230	CTNNA3	TMEM170B	66804359	11560636	-974359	89364	2.65801	Inf	3	1
173126	106747	chr10	chr6	65830000	11740000	1736160000	1070410000	ENSG00000183230	ENSG00000111863	ENSG00000183230_ENSG00000111863	ENSG00000111863_ENSG00000183230	CTNNA3	ADTRP	66804359	11759550	-974359	-19550	2.65801	Inf	3	1
173126	120362	chr10	chr6	65830000	147890000	1736160000	1206560000	ENSG00000183230	ENSG00000203727	ENSG00000183230_ENSG00000203727	ENSG00000203727_ENSG00000183230	CTNNA3	SAMD5	66804359	147623118	-974359	266882	2.65801	Inf	3	1
173126	123939	chr10	chr7	65830000	13850000	1736160000	1242820000	ENSG00000183230	ENSG00000006468	ENSG00000183230_ENSG00000006468	ENSG00000006468_ENSG00000183230	CTNNA3	ETV1	66804359	13941327	-974359	-91327	2.65801	Inf	3	1
173126	132908	chr10	chr7	65830000	103540000	1736160000	1332510000	ENSG00000183230	ENSG00000170615	ENSG00000183230_ENSG00000170615	ENSG00000170615_ENSG00000183230	CTNNA3	SLC26A5	66804359	103399454	-974359	140546	2.65801	Inf	3	1
173126	133680	chr10	chr7	65830000	111260000	1736160000	1340230000	ENSG00000183230	ENSG00000184903	ENSG00000183230_ENSG00000184903	ENSG00000184903_ENSG00000183230	CTNNA3	IMMP2L	66804359	111112784	-974359	147216	2.65801	Inf	3	1
173126	134494	chr10	chr7	65830000	119400000	1736160000	1348370000	ENSG00000183230	ENSG00000106013	ENSG00000183230_ENSG00000106013	ENSG00000106013_ENSG00000183230	CTNNA3	ANKRD7	66804359	118355420	-974359	1044580	2.65801	Inf	3	1
173126	134851	chr10	chr7	65830000	122970000	1736160000	1351940000	ENSG00000183230	ENSG00000128519	ENSG00000183230_ENSG00000128519	ENSG00000128519_ENSG00000183230	CTNNA3	TAS2R16	66804359	122995202	-974359	-25202	2.65801	Inf	3	1
173126	137147	chr10	chr7	65830000	145930000	1736160000	1374900000	ENSG00000183230	ENSG00000196511	ENSG00000183230_ENSG00000196511	ENSG00000196511_ENSG00000183230	CTNNA3	TPK1	66804359	144644168	-974359	1285832	2.65801	Inf	3	1
173126	139179	chr10	chr8	65830000	7900000	1736160000	1395710000	ENSG00000183230	ENSG00000171711	ENSG00000183230_ENSG00000171711	ENSG00000171711_ENSG00000183230	CTNNA3	DEFB4A	66804359	7895670	-974359	4330	2.65801	Inf	3	1
173126	147985	chr10	chr8	65830000	95960000	1736160000	1483770000	ENSG00000183230	ENSG00000156466	ENSG00000183230_ENSG00000156466	ENSG00000156466_ENSG00000183230	CTNNA3	GDF6	66804359	96151570	-974359	-191570	2.65801	Inf	3	1
173126	152113	chr10	chr8	65830000	137240000	1736160000	1525050000	ENSG00000183230	ENSG00000147724	ENSG00000183230_ENSG00000147724	ENSG00000147724_ENSG00000183230	CTNNA3	FAM135B	66804359	138313642	-974359	-1073642	2.65801	Inf	3	1
173126	160196	chr10	chr9	65830000	73930000	1736160000	1606370000	ENSG00000183230	ENSG00000198963	ENSG00000183230_ENSG00000198963	ENSG00000198963_ENSG00000183230	CTNNA3	RORB	66804359	74595256	-974359	-665256	2.65801	Inf	3	1
173126	160498	chr10	chr9	65830000	76950000	1736160000	1609390000	ENSG00000183230	ENSG00000204612	ENSG00000183230_ENSG00000204612	ENSG00000204612_ENSG00000183230	CTNNA3	FOXB2	66804359	77020304	-974359	-70304	2.65801	Inf	3	1
173126	161805	chr10	chr9	65830000	90020000	1736160000	1622460000	ENSG00000183230	ENSG00000130222	ENSG00000183230_ENSG00000130222	ENSG00000130222_ENSG00000183230	CTNNA3	GADD45G	66804359	89605784	-974359	414216	2.65801	Inf	3	1
173126	162022	chr10	chr9	65830000	92190000	1736160000	1624630000	ENSG00000183230	ENSG00000196305	ENSG00000183230_ENSG00000196305	ENSG00000196305_ENSG00000183230	CTNNA3	IARS	66804359	92251982	-974359	-61982	2.65801	Inf	3	1
173126	164860	chr10	chr9	65830000	120570000	1736160000	1653010000	ENSG00000183230	ENSG00000136861	ENSG00000183230_ENSG00000136861	ENSG00000136861_ENSG00000183230	CTNNA3	CDK5RAP2	66804359	120484520	-974359	85480	2.65801	Inf	3	1
174816	32891	chr10	chr2	82730000	81440000	1753060000	329890000	ENSG00000185737	ENSG00000162951	ENSG00000185737_ENSG00000162951	ENSG00000162951_ENSG00000185737	NRG3	LRRTM1	82431186	80296552	298814	1143448	3.13513	Inf	4	0
174816	56563	chr10	chr3	82730000	76960000	1753060000	567100000	ENSG00000185737	ENSG00000185008	ENSG00000185737_ENSG00000185008	ENSG00000185008_ENSG00000185737	NRG3	ROBO2	82431186	76778330	298814	181670	3.13513	Inf	4	0
174816	117724	chr10	chr6	82730000	121510000	1753060000	1180180000	ENSG00000185737	ENSG00000152661	ENSG00000185737_ENSG00000152661	ENSG00000152661_ENSG00000185737	NRG3	GJA1	82431186	121442661	298814	67339	3.13513	Inf	4	0
174816	165710	chr10	chr9	82730000	129070000	1753060000	1661510000	ENSG00000185737	ENSG00000148343	ENSG00000185737_ENSG00000148343	ENSG00000148343_ENSG00000185737	NRG3	MIGA2	82431186	129054352	298814	15648	3.13513	Inf	4	0
177459	1264	chr10	chr1	109160000	13130000	1779490000	13130000	ENSG00000108039	ENSG00000275774	ENSG00000108039_ENSG00000275774	ENSG00000275774_ENSG00000108039	XPNPEP1	HNRNPCL2	109894160	13116175	-734160	13825	2.65801	Inf	3	0
177459	130492	chr10	chr7	109160000	79380000	1779490000	1308350000	ENSG00000108039	ENSG00000127955	ENSG00000108039_ENSG00000127955	ENSG00000127955_ENSG00000108039	XPNPEP1	GNAI1	109894160	79997104	-734160	-617104	2.65801	Inf	3	0
177459	137205	chr10	chr7	109160000	146510000	1779490000	1375480000	ENSG00000108039	ENSG00000174469	ENSG00000108039_ENSG00000174469	ENSG00000174469_ENSG00000108039	XPNPEP1	CNTNAP2	109894160	147268500	-734160	-758500	2.65801	Inf	3	0
177483	4647	chr10	chr1	109400000	46960000	1779730000	46960000	ENSG00000108039	ENSG00000187048	ENSG00000108039_ENSG00000187048	ENSG00000187048_ENSG00000108039	XPNPEP1	CYP4A11	109894160	46935330	-494160	24670	2.65801	Inf	3	1
177483	16334	chr10	chr1	109400000	163830000	1779730000	163830000	ENSG00000108039	ENSG00000143228	ENSG00000108039_ENSG00000143228	ENSG00000143228_ENSG00000108039	XPNPEP1	NUF2	109894160	163311170	-494160	518830	2.65801	Inf	3	1
177483	16721	chr10	chr1	109400000	167700000	1779730000	167700000	ENSG00000108039	ENSG00000198771	ENSG00000108039_ENSG00000198771	ENSG00000198771_ENSG00000108039	XPNPEP1	RCSD1	109894160	167669394	-494160	30606	2.65801	Inf	3	1
177483	17056	chr10	chr1	109400000	171050000	1779730000	171050000	ENSG00000108039	ENSG00000117501	ENSG00000108039_ENSG00000117501	ENSG00000117501_ENSG00000108039	XPNPEP1	MROH9	109894160	171000118	-494160	49882	2.65801	Inf	3	1
177483	17058	chr10	chr1	109400000	171070000	1779730000	171070000	ENSG00000108039	ENSG00000007933	ENSG00000108039_ENSG00000007933	ENSG00000007933_ENSG00000108039	XPNPEP1	FMO3	109894160	171104360	-494160	-34360	2.65801	Inf	3	1
177483	21854	chr10	chr1	109400000	219030000	1779730000	219030000	ENSG00000108039	ENSG00000143353	ENSG00000108039_ENSG00000143353	ENSG00000143353_ENSG00000108039	XPNPEP1	LYPLAL1	109894160	219193367	-494160	-163367	2.65801	Inf	3	1
177483	25228	chr10	chr2	109400000	4810000	1779730000	253260000	ENSG00000108039	ENSG00000176887	ENSG00000108039_ENSG00000176887	ENSG00000176887_ENSG00000108039	XPNPEP1	SOX11	109894160	5696884	-494160	-886884	2.65801	Inf	3	1
177483	50034	chr10	chr3	109400000	11670000	1779730000	501810000	ENSG00000108039	ENSG00000144560	ENSG00000108039_ENSG00000144560	ENSG00000144560_ENSG00000108039	XPNPEP1	VGLL4	109894160	11663710	-494160	6290	2.65801	Inf	3	1
177483	50058	chr10	chr3	109400000	11910000	1779730000	502050000	ENSG00000108039	ENSG00000144559	ENSG00000108039_ENSG00000144559	ENSG00000144559_ENSG00000108039	XPNPEP1	TAMM41	109894160	11818680	-494160	91320	2.65801	Inf	3	1
177483	51748	chr10	chr3	109400000	28810000	1779730000	518950000	ENSG00000108039	ENSG00000283563	ENSG00000108039_ENSG00000283563	ENSG00000283563_ENSG00000108039	XPNPEP1	AC098650.1	109894160	29058358	-494160	-248358	2.65801	Inf	3	1
177483	52175	chr10	chr3	109400000	33080000	1779730000	523220000	ENSG00000108039	ENSG00000188167	ENSG00000108039_ENSG00000188167	ENSG00000188167_ENSG00000108039	XPNPEP1	TMPPE	109894160	33093784	-494160	-13784	2.65801	Inf	3	1
177483	63247	chr10	chr3	109400000	143800000	1779730000	633940000	ENSG00000108039	ENSG00000181744	ENSG00000108039_ENSG00000181744	ENSG00000181744_ENSG00000108039	XPNPEP1	DIPK2A	109894160	144010258	-494160	-210258	2.65801	Inf	3	1
177483	68051	chr10	chr3	109400000	191840000	1779730000	681980000	ENSG00000108039	ENSG00000253548	ENSG00000108039_ENSG00000253548	ENSG00000253548_ENSG00000108039	XPNPEP1	PYDC2	109894160	191461310	-494160	378690	2.65801	Inf	3	1
177483	71844	chr10	chr4	109400000	32470000	1779730000	720400000	ENSG00000108039	ENSG00000169851	ENSG00000108039_ENSG00000169851	ENSG00000169851_ENSG00000108039	XPNPEP1	PCDH7	109894160	30933610	-494160	1536390	2.65801	Inf	3	1
177483	86574	chr10	chr4	109400000	179770000	1779730000	867700000	ENSG00000108039	ENSG00000038002	ENSG00000108039_ENSG00000038002	ENSG00000038002_ENSG00000108039	XPNPEP1	AGA	109894160	177436606	-494160	2333394	2.65801	Inf	3	1
177483	89134	chr10	chr5	109400000	16150000	1779730000	893790000	ENSG00000108039	ENSG00000183654	ENSG00000108039_ENSG00000183654	ENSG00000183654_ENSG00000108039	XPNPEP1	2021-03-11	109894160	16123950	-494160	26050	2.65801	Inf	3	1
177483	89828	chr10	chr5	109400000	23090000	1779730000	900730000	ENSG00000108039	ENSG00000164256	ENSG00000108039_ENSG00000164256	ENSG00000164256_ENSG00000108039	XPNPEP1	PRDM9	109894160	23486092	-494160	-396092	2.65801	Inf	3	1
177483	101840	chr10	chr5	109400000	143210000	1779730000	1020850000	ENSG00000108039	ENSG00000113580	ENSG00000108039_ENSG00000113580	ENSG00000113580_ENSG00000108039	XPNPEP1	NR3C1	109894160	143356722	-494160	-146722	2.65801	Inf	3	1
177483	106738	chr10	chr6	109400000	11650000	1779730000	1070320000	ENSG00000108039	ENSG00000205269	ENSG00000108039_ENSG00000205269	ENSG00000205269_ENSG00000108039	XPNPEP1	TMEM170B	109894160	11560636	-494160	89364	2.65801	Inf	3	1
177483	106747	chr10	chr6	109400000	11740000	1779730000	1070410000	ENSG00000108039	ENSG00000111863	ENSG00000108039_ENSG00000111863	ENSG00000111863_ENSG00000108039	XPNPEP1	ADTRP	109894160	11759550	-494160	-19550	2.65801	Inf	3	1
177483	120362	chr10	chr6	109400000	147890000	1779730000	1206560000	ENSG00000108039	ENSG00000203727	ENSG00000108039_ENSG00000203727	ENSG00000203727_ENSG00000108039	XPNPEP1	SAMD5	109894160	147623118	-494160	266882	2.65801	Inf	3	1
177483	123939	chr10	chr7	109400000	13850000	1779730000	1242820000	ENSG00000108039	ENSG00000006468	ENSG00000108039_ENSG00000006468	ENSG00000006468_ENSG00000108039	XPNPEP1	ETV1	109894160	13941327	-494160	-91327	2.65801	Inf	3	1
177483	132908	chr10	chr7	109400000	103540000	1779730000	1332510000	ENSG00000108039	ENSG00000170615	ENSG00000108039_ENSG00000170615	ENSG00000170615_ENSG00000108039	XPNPEP1	SLC26A5	109894160	103399454	-494160	140546	2.65801	Inf	3	1
177483	133680	chr10	chr7	109400000	111260000	1779730000	1340230000	ENSG00000108039	ENSG00000184903	ENSG00000108039_ENSG00000184903	ENSG00000184903_ENSG00000108039	XPNPEP1	IMMP2L	109894160	111112784	-494160	147216	2.65801	Inf	3	1
177483	134494	chr10	chr7	109400000	119400000	1779730000	1348370000	ENSG00000108039	ENSG00000106013	ENSG00000108039_ENSG00000106013	ENSG00000106013_ENSG00000108039	XPNPEP1	ANKRD7	109894160	118355420	-494160	1044580	2.65801	Inf	3	1
177483	134851	chr10	chr7	109400000	122970000	1779730000	1351940000	ENSG00000108039	ENSG00000128519	ENSG00000108039_ENSG00000128519	ENSG00000128519_ENSG00000108039	XPNPEP1	TAS2R16	109894160	122995202	-494160	-25202	2.65801	Inf	3	1
177483	137147	chr10	chr7	109400000	145930000	1779730000	1374900000	ENSG00000108039	ENSG00000196511	ENSG00000108039_ENSG00000196511	ENSG00000196511_ENSG00000108039	XPNPEP1	TPK1	109894160	144644168	-494160	1285832	2.65801	Inf	3	1
177483	139179	chr10	chr8	109400000	7900000	1779730000	1395710000	ENSG00000108039	ENSG00000171711	ENSG00000108039_ENSG00000171711	ENSG00000171711_ENSG00000108039	XPNPEP1	DEFB4A	109894160	7895670	-494160	4330	2.65801	Inf	3	1
177483	147985	chr10	chr8	109400000	95960000	1779730000	1483770000	ENSG00000108039	ENSG00000156466	ENSG00000108039_ENSG00000156466	ENSG00000156466_ENSG00000108039	XPNPEP1	GDF6	109894160	96151570	-494160	-191570	2.65801	Inf	3	1
177483	152113	chr10	chr8	109400000	137240000	1779730000	1525050000	ENSG00000108039	ENSG00000147724	ENSG00000108039_ENSG00000147724	ENSG00000147724_ENSG00000108039	XPNPEP1	FAM135B	109894160	138313642	-494160	-1073642	2.65801	Inf	3	1
177483	160196	chr10	chr9	109400000	73930000	1779730000	1606370000	ENSG00000108039	ENSG00000198963	ENSG00000108039_ENSG00000198963	ENSG00000198963_ENSG00000108039	XPNPEP1	RORB	109894160	74595256	-494160	-665256	2.65801	Inf	3	1
177483	160498	chr10	chr9	109400000	76950000	1779730000	1609390000	ENSG00000108039	ENSG00000204612	ENSG00000108039_ENSG00000204612	ENSG00000204612_ENSG00000108039	XPNPEP1	FOXB2	109894160	77020304	-494160	-70304	2.65801	Inf	3	1
177483	161805	chr10	chr9	109400000	90020000	1779730000	1622460000	ENSG00000108039	ENSG00000130222	ENSG00000108039_ENSG00000130222	ENSG00000130222_ENSG00000108039	XPNPEP1	GADD45G	109894160	89605784	-494160	414216	2.65801	Inf	3	1
177483	162022	chr10	chr9	109400000	92190000	1779730000	1624630000	ENSG00000108039	ENSG00000196305	ENSG00000108039_ENSG00000196305	ENSG00000196305_ENSG00000108039	XPNPEP1	IARS	109894160	92251982	-494160	-61982	2.65801	Inf	3	1
177483	164860	chr10	chr9	109400000	120570000	1779730000	1653010000	ENSG00000108039	ENSG00000136861	ENSG00000108039_ENSG00000136861	ENSG00000136861_ENSG00000108039	XPNPEP1	CDK5RAP2	109894160	120484520	-494160	85480	2.65801	Inf	3	1
177483	173040	chr10	chr10	109400000	64970000	1779730000	1735300000	ENSG00000108039	ENSG00000165476	ENSG00000108039_ENSG00000165476	ENSG00000165476_ENSG00000108039	XPNPEP1	REEP3	109894160	63573264	-494160	1396736	2.65801	Inf	3	1
177483	173126	chr10	chr10	109400000	65830000	1779730000	1736160000	ENSG00000108039	ENSG00000183230	ENSG00000108039_ENSG00000183230	ENSG00000183230_ENSG00000108039	XPNPEP1	CTNNA3	109894160	66804359	-494160	-974359	2.65801	Inf	3	1
177643	4647	chr10	chr1	111000000	46960000	1781330000	46960000	ENSG00000108061	ENSG00000187048	ENSG00000108061_ENSG00000187048	ENSG00000187048_ENSG00000108061	SHOC2	CYP4A11	110966607	46935330	33393	24670	2.65801	Inf	3	1
177643	16334	chr10	chr1	111000000	163830000	1781330000	163830000	ENSG00000108061	ENSG00000143228	ENSG00000108061_ENSG00000143228	ENSG00000143228_ENSG00000108061	SHOC2	NUF2	110966607	163311170	33393	518830	2.65801	Inf	3	1
177643	16721	chr10	chr1	111000000	167700000	1781330000	167700000	ENSG00000108061	ENSG00000198771	ENSG00000108061_ENSG00000198771	ENSG00000198771_ENSG00000108061	SHOC2	RCSD1	110966607	167669394	33393	30606	2.65801	Inf	3	1
177643	17056	chr10	chr1	111000000	171050000	1781330000	171050000	ENSG00000108061	ENSG00000117501	ENSG00000108061_ENSG00000117501	ENSG00000117501_ENSG00000108061	SHOC2	MROH9	110966607	171000118	33393	49882	2.65801	Inf	3	1
177643	17058	chr10	chr1	111000000	171070000	1781330000	171070000	ENSG00000108061	ENSG00000007933	ENSG00000108061_ENSG00000007933	ENSG00000007933_ENSG00000108061	SHOC2	FMO3	110966607	171104360	33393	-34360	2.65801	Inf	3	1
177643	21854	chr10	chr1	111000000	219030000	1781330000	219030000	ENSG00000108061	ENSG00000143353	ENSG00000108061_ENSG00000143353	ENSG00000143353_ENSG00000108061	SHOC2	LYPLAL1	110966607	219193367	33393	-163367	2.65801	Inf	3	1
177643	25228	chr10	chr2	111000000	4810000	1781330000	253260000	ENSG00000108061	ENSG00000176887	ENSG00000108061_ENSG00000176887	ENSG00000176887_ENSG00000108061	SHOC2	SOX11	110966607	5696884	33393	-886884	2.65801	Inf	3	1
177643	50034	chr10	chr3	111000000	11670000	1781330000	501810000	ENSG00000108061	ENSG00000144560	ENSG00000108061_ENSG00000144560	ENSG00000144560_ENSG00000108061	SHOC2	VGLL4	110966607	11663710	33393	6290	2.65801	Inf	3	1
177643	50058	chr10	chr3	111000000	11910000	1781330000	502050000	ENSG00000108061	ENSG00000144559	ENSG00000108061_ENSG00000144559	ENSG00000144559_ENSG00000108061	SHOC2	TAMM41	110966607	11818680	33393	91320	2.65801	Inf	3	1
177643	51748	chr10	chr3	111000000	28810000	1781330000	518950000	ENSG00000108061	ENSG00000283563	ENSG00000108061_ENSG00000283563	ENSG00000283563_ENSG00000108061	SHOC2	AC098650.1	110966607	29058358	33393	-248358	2.65801	Inf	3	1
177643	52175	chr10	chr3	111000000	33080000	1781330000	523220000	ENSG00000108061	ENSG00000188167	ENSG00000108061_ENSG00000188167	ENSG00000188167_ENSG00000108061	SHOC2	TMPPE	110966607	33093784	33393	-13784	2.65801	Inf	3	1
177643	63247	chr10	chr3	111000000	143800000	1781330000	633940000	ENSG00000108061	ENSG00000181744	ENSG00000108061_ENSG00000181744	ENSG00000181744_ENSG00000108061	SHOC2	DIPK2A	110966607	144010258	33393	-210258	2.65801	Inf	3	1
177643	68051	chr10	chr3	111000000	191840000	1781330000	681980000	ENSG00000108061	ENSG00000253548	ENSG00000108061_ENSG00000253548	ENSG00000253548_ENSG00000108061	SHOC2	PYDC2	110966607	191461310	33393	378690	2.65801	Inf	3	1
177643	71844	chr10	chr4	111000000	32470000	1781330000	720400000	ENSG00000108061	ENSG00000169851	ENSG00000108061_ENSG00000169851	ENSG00000169851_ENSG00000108061	SHOC2	PCDH7	110966607	30933610	33393	1536390	2.65801	Inf	3	1
177643	86574	chr10	chr4	111000000	179770000	1781330000	867700000	ENSG00000108061	ENSG00000038002	ENSG00000108061_ENSG00000038002	ENSG00000038002_ENSG00000108061	SHOC2	AGA	110966607	177436606	33393	2333394	2.65801	Inf	3	1
177643	89134	chr10	chr5	111000000	16150000	1781330000	893790000	ENSG00000108061	ENSG00000183654	ENSG00000108061_ENSG00000183654	ENSG00000183654_ENSG00000108061	SHOC2	2021-03-11	110966607	16123950	33393	26050	2.65801	Inf	3	1
177643	89828	chr10	chr5	111000000	23090000	1781330000	900730000	ENSG00000108061	ENSG00000164256	ENSG00000108061_ENSG00000164256	ENSG00000164256_ENSG00000108061	SHOC2	PRDM9	110966607	23486092	33393	-396092	2.65801	Inf	3	1
177643	101840	chr10	chr5	111000000	143210000	1781330000	1020850000	ENSG00000108061	ENSG00000113580	ENSG00000108061_ENSG00000113580	ENSG00000113580_ENSG00000108061	SHOC2	NR3C1	110966607	143356722	33393	-146722	2.65801	Inf	3	1
177643	106738	chr10	chr6	111000000	11650000	1781330000	1070320000	ENSG00000108061	ENSG00000205269	ENSG00000108061_ENSG00000205269	ENSG00000205269_ENSG00000108061	SHOC2	TMEM170B	110966607	11560636	33393	89364	2.65801	Inf	3	1
177643	106747	chr10	chr6	111000000	11740000	1781330000	1070410000	ENSG00000108061	ENSG00000111863	ENSG00000108061_ENSG00000111863	ENSG00000111863_ENSG00000108061	SHOC2	ADTRP	110966607	11759550	33393	-19550	2.65801	Inf	3	1
177643	120362	chr10	chr6	111000000	147890000	1781330000	1206560000	ENSG00000108061	ENSG00000203727	ENSG00000108061_ENSG00000203727	ENSG00000203727_ENSG00000108061	SHOC2	SAMD5	110966607	147623118	33393	266882	2.65801	Inf	3	1
177643	123939	chr10	chr7	111000000	13850000	1781330000	1242820000	ENSG00000108061	ENSG00000006468	ENSG00000108061_ENSG00000006468	ENSG00000006468_ENSG00000108061	SHOC2	ETV1	110966607	13941327	33393	-91327	2.65801	Inf	3	1
177643	132908	chr10	chr7	111000000	103540000	1781330000	1332510000	ENSG00000108061	ENSG00000170615	ENSG00000108061_ENSG00000170615	ENSG00000170615_ENSG00000108061	SHOC2	SLC26A5	110966607	103399454	33393	140546	2.65801	Inf	3	1
177643	133680	chr10	chr7	111000000	111260000	1781330000	1340230000	ENSG00000108061	ENSG00000184903	ENSG00000108061_ENSG00000184903	ENSG00000184903_ENSG00000108061	SHOC2	IMMP2L	110966607	111112784	33393	147216	2.65801	Inf	3	1
177643	134494	chr10	chr7	111000000	119400000	1781330000	1348370000	ENSG00000108061	ENSG00000106013	ENSG00000108061_ENSG00000106013	ENSG00000106013_ENSG00000108061	SHOC2	ANKRD7	110966607	118355420	33393	1044580	2.65801	Inf	3	1
177643	134851	chr10	chr7	111000000	122970000	1781330000	1351940000	ENSG00000108061	ENSG00000128519	ENSG00000108061_ENSG00000128519	ENSG00000128519_ENSG00000108061	SHOC2	TAS2R16	110966607	122995202	33393	-25202	2.65801	Inf	3	1
177643	137147	chr10	chr7	111000000	145930000	1781330000	1374900000	ENSG00000108061	ENSG00000196511	ENSG00000108061_ENSG00000196511	ENSG00000196511_ENSG00000108061	SHOC2	TPK1	110966607	144644168	33393	1285832	2.65801	Inf	3	1
177643	139179	chr10	chr8	111000000	7900000	1781330000	1395710000	ENSG00000108061	ENSG00000171711	ENSG00000108061_ENSG00000171711	ENSG00000171711_ENSG00000108061	SHOC2	DEFB4A	110966607	7895670	33393	4330	2.65801	Inf	3	1
177643	147985	chr10	chr8	111000000	95960000	1781330000	1483770000	ENSG00000108061	ENSG00000156466	ENSG00000108061_ENSG00000156466	ENSG00000156466_ENSG00000108061	SHOC2	GDF6	110966607	96151570	33393	-191570	2.65801	Inf	3	1
177643	152113	chr10	chr8	111000000	137240000	1781330000	1525050000	ENSG00000108061	ENSG00000147724	ENSG00000108061_ENSG00000147724	ENSG00000147724_ENSG00000108061	SHOC2	FAM135B	110966607	138313642	33393	-1073642	2.65801	Inf	3	1
177643	160196	chr10	chr9	111000000	73930000	1781330000	1606370000	ENSG00000108061	ENSG00000198963	ENSG00000108061_ENSG00000198963	ENSG00000198963_ENSG00000108061	SHOC2	RORB	110966607	74595256	33393	-665256	2.65801	Inf	3	1
177643	160498	chr10	chr9	111000000	76950000	1781330000	1609390000	ENSG00000108061	ENSG00000204612	ENSG00000108061_ENSG00000204612	ENSG00000204612_ENSG00000108061	SHOC2	FOXB2	110966607	77020304	33393	-70304	2.65801	Inf	3	1
177643	161805	chr10	chr9	111000000	90020000	1781330000	1622460000	ENSG00000108061	ENSG00000130222	ENSG00000108061_ENSG00000130222	ENSG00000130222_ENSG00000108061	SHOC2	GADD45G	110966607	89605784	33393	414216	2.65801	Inf	3	1
177643	162022	chr10	chr9	111000000	92190000	1781330000	1624630000	ENSG00000108061	ENSG00000196305	ENSG00000108061_ENSG00000196305	ENSG00000196305_ENSG00000108061	SHOC2	IARS	110966607	92251982	33393	-61982	2.65801	Inf	3	1
177643	164860	chr10	chr9	111000000	120570000	1781330000	1653010000	ENSG00000108061	ENSG00000136861	ENSG00000108061_ENSG00000136861	ENSG00000136861_ENSG00000108061	SHOC2	CDK5RAP2	110966607	120484520	33393	85480	2.65801	Inf	3	1
177643	173040	chr10	chr10	111000000	64970000	1781330000	1735300000	ENSG00000108061	ENSG00000165476	ENSG00000108061_ENSG00000165476	ENSG00000165476_ENSG00000108061	SHOC2	REEP3	110966607	63573264	33393	1396736	2.65801	Inf	3	1
177643	173126	chr10	chr10	111000000	65830000	1781330000	1736160000	ENSG00000108061	ENSG00000183230	ENSG00000108061_ENSG00000183230	ENSG00000183230_ENSG00000108061	SHOC2	CTNNA3	110966607	66804359	33393	-974359	2.65801	Inf	3	1
178138	113503	chr10	chr6	115950000	79300000	1786280000	1137970000	ENSG00000151892	ENSG00000118418	ENSG00000151892_ENSG00000118418	ENSG00000118418_ENSG00000151892	GFRA1	HMGN3	116165196	79217992	-215196	82008	3.6994	Inf	6	0
178138	113520	chr10	chr6	115950000	79470000	1786280000	1138140000	ENSG00000151892	ENSG00000135338	ENSG00000151892_ENSG00000135338	ENSG00000135338_ENSG00000151892	GFRA1	LCA5	116165196	79511224	-215196	-41224	3.6994	Inf	6	0
178205	1536	chr10	chr1	116620000	15850000	1786950000	15850000	ENSG00000187021	ENSG00000233954	ENSG00000187021_ENSG00000233954	ENSG00000233954_ENSG00000187021	PNLIPRP1	UQCRHL	116599780	15808258	20220	41742	3.47756	Inf	5	4
178205	2744	chr10	chr1	116620000	27930000	1786950000	27930000	ENSG00000187021	ENSG00000130768	ENSG00000187021_ENSG00000130768	ENSG00000130768_ENSG00000187021	PNLIPRP1	SMPDL3B	116599780	27947078	20220	-17078	3.47756	Inf	5	4
178205	6123	chr10	chr1	116620000	61720000	1786950000	61720000	ENSG00000187021	ENSG00000162604	ENSG00000187021_ENSG00000162604	ENSG00000162604_ENSG00000187021	PNLIPRP1	TM2D1	116599780	61703234	20220	16766	3.47756	Inf	5	4
178205	34805	chr10	chr2	116620000	100580000	1786950000	349030000	ENSG00000187021	ENSG00000115539	ENSG00000187021_ENSG00000115539	ENSG00000115539_ENSG00000187021	PNLIPRP1	PDCL3	116599780	100569866	20220	10134	3.47756	Inf	5	4
178205	87571	chr10	chr5	116620000	520000	1786950000	878160000	ENSG00000187021	ENSG00000066230	ENSG00000187021_ENSG00000066230	ENSG00000066230_ENSG00000187021	PNLIPRP1	SLC9A3	116599780	497395	20220	22605	3.47756	Inf	5	4
178205	87593	chr10	chr5	116620000	740000	1786950000	878380000	ENSG00000187021	ENSG00000286094	ENSG00000187021_ENSG00000286094	ENSG00000286094_ENSG00000187021	PNLIPRP1	AC026740.3	116599780	741864	20220	-1864	3.47756	Inf	5	4
178205	104583	chr10	chr5	116620000	170640000	1786950000	1048280000	ENSG00000187021	ENSG00000182132	ENSG00000187021_ENSG00000182132	ENSG00000182132_ENSG00000187021	PNLIPRP1	KCNIP1	116599780	170545060	20220	94940	3.47756	Inf	5	4
178205	135802	chr10	chr7	116620000	132480000	1786950000	1361450000	ENSG00000187021	ENSG00000221866	ENSG00000187021_ENSG00000221866	ENSG00000221866_ENSG00000187021	PNLIPRP1	PLXNA4	116599780	132386010	20220	93990	3.47756	Inf	5	4
179872	1536	chr10	chr1	133290000	15850000	1803620000	15850000	ENSG00000130640	ENSG00000233954	ENSG00000130640_ENSG00000233954	ENSG00000233954_ENSG00000130640	TUBGCP2	UQCRHL	133295484	15808258	-5484	41742	3.47756	Inf	5	4
179872	2744	chr10	chr1	133290000	27930000	1803620000	27930000	ENSG00000130640	ENSG00000130768	ENSG00000130640_ENSG00000130768	ENSG00000130768_ENSG00000130640	TUBGCP2	SMPDL3B	133295484	27947078	-5484	-17078	3.47756	Inf	5	4
179872	6123	chr10	chr1	133290000	61720000	1803620000	61720000	ENSG00000130640	ENSG00000162604	ENSG00000130640_ENSG00000162604	ENSG00000162604_ENSG00000130640	TUBGCP2	TM2D1	133295484	61703234	-5484	16766	3.47756	Inf	5	4
179872	34805	chr10	chr2	133290000	100580000	1803620000	349030000	ENSG00000130640	ENSG00000115539	ENSG00000130640_ENSG00000115539	ENSG00000115539_ENSG00000130640	TUBGCP2	PDCL3	133295484	100569866	-5484	10134	3.47756	Inf	5	4
179872	87571	chr10	chr5	133290000	520000	1803620000	878160000	ENSG00000130640	ENSG00000066230	ENSG00000130640_ENSG00000066230	ENSG00000066230_ENSG00000130640	TUBGCP2	SLC9A3	133295484	497395	-5484	22605	3.47756	Inf	5	4
179872	87593	chr10	chr5	133290000	740000	1803620000	878380000	ENSG00000130640	ENSG00000286094	ENSG00000130640_ENSG00000286094	ENSG00000286094_ENSG00000130640	TUBGCP2	AC026740.3	133295484	741864	-5484	-1864	3.47756	Inf	5	4
179872	104583	chr10	chr5	133290000	170640000	1803620000	1048280000	ENSG00000130640	ENSG00000182132	ENSG00000130640_ENSG00000182132	ENSG00000182132_ENSG00000130640	TUBGCP2	KCNIP1	133295484	170545060	-5484	94940	3.47756	Inf	5	4
179872	135802	chr10	chr7	133290000	132480000	1803620000	1361450000	ENSG00000130640	ENSG00000221866	ENSG00000130640_ENSG00000221866	ENSG00000221866_ENSG00000130640	TUBGCP2	PLXNA4	133295484	132386010	-5484	93990	3.47756	Inf	5	4
179872	178205	chr10	chr10	133290000	116620000	1803620000	1786950000	ENSG00000130640	ENSG00000187021	ENSG00000130640_ENSG00000187021	ENSG00000187021_ENSG00000130640	TUBGCP2	PNLIPRP1	133295484	116599780	-5484	20220	3.47756	Inf	5	4
180016	32891	chr11	chr2	1930000	81440000	1805550000	329890000	ENSG00000130595	ENSG00000162951	ENSG00000130595_ENSG00000162951	ENSG00000162951_ENSG00000130595	TNNT3	LRRTM1	1929204	80296552	796	1143448	3.13513	Inf	4	0
180016	56563	chr11	chr3	1930000	76960000	1805550000	567100000	ENSG00000130595	ENSG00000185008	ENSG00000130595_ENSG00000185008	ENSG00000185008_ENSG00000130595	TNNT3	ROBO2	1929204	76778330	796	181670	3.13513	Inf	4	0
180016	117724	chr11	chr6	1930000	121510000	1805550000	1180180000	ENSG00000130595	ENSG00000152661	ENSG00000130595_ENSG00000152661	ENSG00000152661_ENSG00000130595	TNNT3	GJA1	1929204	121442661	796	67339	3.13513	Inf	4	0
180016	165710	chr11	chr9	1930000	129070000	1805550000	1661510000	ENSG00000130595	ENSG00000148343	ENSG00000130595_ENSG00000148343	ENSG00000148343_ENSG00000130595	TNNT3	MIGA2	1929204	129054352	796	15648	3.13513	Inf	4	0
180016	174816	chr11	chr10	1930000	82730000	1805550000	1753060000	ENSG00000130595	ENSG00000185737	ENSG00000130595_ENSG00000185737	ENSG00000185737_ENSG00000130595	TNNT3	NRG3	1929204	82431186	796	298814	3.13513	Inf	4	0
181225	4647	chr11	chr1	14020000	46960000	1817640000	46960000	ENSG00000262655	ENSG00000187048	ENSG00000262655_ENSG00000187048	ENSG00000187048_ENSG00000262655	SPON1	CYP4A11	14115428	46935330	-95428	24670	2.65801	Inf	3	1
181225	16334	chr11	chr1	14020000	163830000	1817640000	163830000	ENSG00000262655	ENSG00000143228	ENSG00000262655_ENSG00000143228	ENSG00000143228_ENSG00000262655	SPON1	NUF2	14115428	163311170	-95428	518830	2.65801	Inf	3	1
181225	16721	chr11	chr1	14020000	167700000	1817640000	167700000	ENSG00000262655	ENSG00000198771	ENSG00000262655_ENSG00000198771	ENSG00000198771_ENSG00000262655	SPON1	RCSD1	14115428	167669394	-95428	30606	2.65801	Inf	3	1
181225	17056	chr11	chr1	14020000	171050000	1817640000	171050000	ENSG00000262655	ENSG00000117501	ENSG00000262655_ENSG00000117501	ENSG00000117501_ENSG00000262655	SPON1	MROH9	14115428	171000118	-95428	49882	2.65801	Inf	3	1
181225	17058	chr11	chr1	14020000	171070000	1817640000	171070000	ENSG00000262655	ENSG00000007933	ENSG00000262655_ENSG00000007933	ENSG00000007933_ENSG00000262655	SPON1	FMO3	14115428	171104360	-95428	-34360	2.65801	Inf	3	1
181225	21854	chr11	chr1	14020000	219030000	1817640000	219030000	ENSG00000262655	ENSG00000143353	ENSG00000262655_ENSG00000143353	ENSG00000143353_ENSG00000262655	SPON1	LYPLAL1	14115428	219193367	-95428	-163367	2.65801	Inf	3	1
181225	25228	chr11	chr2	14020000	4810000	1817640000	253260000	ENSG00000262655	ENSG00000176887	ENSG00000262655_ENSG00000176887	ENSG00000176887_ENSG00000262655	SPON1	SOX11	14115428	5696884	-95428	-886884	2.65801	Inf	3	1
181225	50034	chr11	chr3	14020000	11670000	1817640000	501810000	ENSG00000262655	ENSG00000144560	ENSG00000262655_ENSG00000144560	ENSG00000144560_ENSG00000262655	SPON1	VGLL4	14115428	11663710	-95428	6290	2.65801	Inf	3	1
181225	50058	chr11	chr3	14020000	11910000	1817640000	502050000	ENSG00000262655	ENSG00000144559	ENSG00000262655_ENSG00000144559	ENSG00000144559_ENSG00000262655	SPON1	TAMM41	14115428	11818680	-95428	91320	2.65801	Inf	3	1
181225	51748	chr11	chr3	14020000	28810000	1817640000	518950000	ENSG00000262655	ENSG00000283563	ENSG00000262655_ENSG00000283563	ENSG00000283563_ENSG00000262655	SPON1	AC098650.1	14115428	29058358	-95428	-248358	2.65801	Inf	3	1
181225	52175	chr11	chr3	14020000	33080000	1817640000	523220000	ENSG00000262655	ENSG00000188167	ENSG00000262655_ENSG00000188167	ENSG00000188167_ENSG00000262655	SPON1	TMPPE	14115428	33093784	-95428	-13784	2.65801	Inf	3	1
181225	63247	chr11	chr3	14020000	143800000	1817640000	633940000	ENSG00000262655	ENSG00000181744	ENSG00000262655_ENSG00000181744	ENSG00000181744_ENSG00000262655	SPON1	DIPK2A	14115428	144010258	-95428	-210258	2.65801	Inf	3	1
181225	68051	chr11	chr3	14020000	191840000	1817640000	681980000	ENSG00000262655	ENSG00000253548	ENSG00000262655_ENSG00000253548	ENSG00000253548_ENSG00000262655	SPON1	PYDC2	14115428	191461310	-95428	378690	2.65801	Inf	3	1
181225	71844	chr11	chr4	14020000	32470000	1817640000	720400000	ENSG00000262655	ENSG00000169851	ENSG00000262655_ENSG00000169851	ENSG00000169851_ENSG00000262655	SPON1	PCDH7	14115428	30933610	-95428	1536390	2.65801	Inf	3	1
181225	86574	chr11	chr4	14020000	179770000	1817640000	867700000	ENSG00000262655	ENSG00000038002	ENSG00000262655_ENSG00000038002	ENSG00000038002_ENSG00000262655	SPON1	AGA	14115428	177436606	-95428	2333394	2.65801	Inf	3	1
181225	89134	chr11	chr5	14020000	16150000	1817640000	893790000	ENSG00000262655	ENSG00000183654	ENSG00000262655_ENSG00000183654	ENSG00000183654_ENSG00000262655	SPON1	2021-03-11	14115428	16123950	-95428	26050	2.65801	Inf	3	1
181225	89828	chr11	chr5	14020000	23090000	1817640000	900730000	ENSG00000262655	ENSG00000164256	ENSG00000262655_ENSG00000164256	ENSG00000164256_ENSG00000262655	SPON1	PRDM9	14115428	23486092	-95428	-396092	2.65801	Inf	3	1
181225	101840	chr11	chr5	14020000	143210000	1817640000	1020850000	ENSG00000262655	ENSG00000113580	ENSG00000262655_ENSG00000113580	ENSG00000113580_ENSG00000262655	SPON1	NR3C1	14115428	143356722	-95428	-146722	2.65801	Inf	3	1
181225	106738	chr11	chr6	14020000	11650000	1817640000	1070320000	ENSG00000262655	ENSG00000205269	ENSG00000262655_ENSG00000205269	ENSG00000205269_ENSG00000262655	SPON1	TMEM170B	14115428	11560636	-95428	89364	2.65801	Inf	3	1
181225	106747	chr11	chr6	14020000	11740000	1817640000	1070410000	ENSG00000262655	ENSG00000111863	ENSG00000262655_ENSG00000111863	ENSG00000111863_ENSG00000262655	SPON1	ADTRP	14115428	11759550	-95428	-19550	2.65801	Inf	3	1
181225	120362	chr11	chr6	14020000	147890000	1817640000	1206560000	ENSG00000262655	ENSG00000203727	ENSG00000262655_ENSG00000203727	ENSG00000203727_ENSG00000262655	SPON1	SAMD5	14115428	147623118	-95428	266882	2.65801	Inf	3	1
181225	123939	chr11	chr7	14020000	13850000	1817640000	1242820000	ENSG00000262655	ENSG00000006468	ENSG00000262655_ENSG00000006468	ENSG00000006468_ENSG00000262655	SPON1	ETV1	14115428	13941327	-95428	-91327	2.65801	Inf	3	1
181225	132908	chr11	chr7	14020000	103540000	1817640000	1332510000	ENSG00000262655	ENSG00000170615	ENSG00000262655_ENSG00000170615	ENSG00000170615_ENSG00000262655	SPON1	SLC26A5	14115428	103399454	-95428	140546	2.65801	Inf	3	1
181225	133680	chr11	chr7	14020000	111260000	1817640000	1340230000	ENSG00000262655	ENSG00000184903	ENSG00000262655_ENSG00000184903	ENSG00000184903_ENSG00000262655	SPON1	IMMP2L	14115428	111112784	-95428	147216	2.65801	Inf	3	1
181225	134494	chr11	chr7	14020000	119400000	1817640000	1348370000	ENSG00000262655	ENSG00000106013	ENSG00000262655_ENSG00000106013	ENSG00000106013_ENSG00000262655	SPON1	ANKRD7	14115428	118355420	-95428	1044580	2.65801	Inf	3	1
181225	134851	chr11	chr7	14020000	122970000	1817640000	1351940000	ENSG00000262655	ENSG00000128519	ENSG00000262655_ENSG00000128519	ENSG00000128519_ENSG00000262655	SPON1	TAS2R16	14115428	122995202	-95428	-25202	2.65801	Inf	3	1
181225	137147	chr11	chr7	14020000	145930000	1817640000	1374900000	ENSG00000262655	ENSG00000196511	ENSG00000262655_ENSG00000196511	ENSG00000196511_ENSG00000262655	SPON1	TPK1	14115428	144644168	-95428	1285832	2.65801	Inf	3	1
181225	139179	chr11	chr8	14020000	7900000	1817640000	1395710000	ENSG00000262655	ENSG00000171711	ENSG00000262655_ENSG00000171711	ENSG00000171711_ENSG00000262655	SPON1	DEFB4A	14115428	7895670	-95428	4330	2.65801	Inf	3	1
181225	147985	chr11	chr8	14020000	95960000	1817640000	1483770000	ENSG00000262655	ENSG00000156466	ENSG00000262655_ENSG00000156466	ENSG00000156466_ENSG00000262655	SPON1	GDF6	14115428	96151570	-95428	-191570	2.65801	Inf	3	1
181225	152113	chr11	chr8	14020000	137240000	1817640000	1525050000	ENSG00000262655	ENSG00000147724	ENSG00000262655_ENSG00000147724	ENSG00000147724_ENSG00000262655	SPON1	FAM135B	14115428	138313642	-95428	-1073642	2.65801	Inf	3	1
181225	160196	chr11	chr9	14020000	73930000	1817640000	1606370000	ENSG00000262655	ENSG00000198963	ENSG00000262655_ENSG00000198963	ENSG00000198963_ENSG00000262655	SPON1	RORB	14115428	74595256	-95428	-665256	2.65801	Inf	3	1
181225	160498	chr11	chr9	14020000	76950000	1817640000	1609390000	ENSG00000262655	ENSG00000204612	ENSG00000262655_ENSG00000204612	ENSG00000204612_ENSG00000262655	SPON1	FOXB2	14115428	77020304	-95428	-70304	2.65801	Inf	3	1
181225	161805	chr11	chr9	14020000	90020000	1817640000	1622460000	ENSG00000262655	ENSG00000130222	ENSG00000262655_ENSG00000130222	ENSG00000130222_ENSG00000262655	SPON1	GADD45G	14115428	89605784	-95428	414216	2.65801	Inf	3	1
181225	162022	chr11	chr9	14020000	92190000	1817640000	1624630000	ENSG00000262655	ENSG00000196305	ENSG00000262655_ENSG00000196305	ENSG00000196305_ENSG00000262655	SPON1	IARS	14115428	92251982	-95428	-61982	2.65801	Inf	3	1
181225	164860	chr11	chr9	14020000	120570000	1817640000	1653010000	ENSG00000262655	ENSG00000136861	ENSG00000262655_ENSG00000136861	ENSG00000136861_ENSG00000262655	SPON1	CDK5RAP2	14115428	120484520	-95428	85480	2.65801	Inf	3	1
181225	173040	chr11	chr10	14020000	64970000	1817640000	1735300000	ENSG00000262655	ENSG00000165476	ENSG00000262655_ENSG00000165476	ENSG00000165476_ENSG00000262655	SPON1	REEP3	14115428	63573264	-95428	1396736	2.65801	Inf	3	1
181225	173126	chr11	chr10	14020000	65830000	1817640000	1736160000	ENSG00000262655	ENSG00000183230	ENSG00000262655_ENSG00000183230	ENSG00000183230_ENSG00000262655	SPON1	CTNNA3	14115428	66804359	-95428	-974359	2.65801	Inf	3	1
181225	177483	chr11	chr10	14020000	109400000	1817640000	1779730000	ENSG00000262655	ENSG00000108039	ENSG00000262655_ENSG00000108039	ENSG00000108039_ENSG00000262655	SPON1	XPNPEP1	14115428	109894160	-95428	-494160	2.65801	Inf	3	1
181225	177643	chr11	chr10	14020000	111000000	1817640000	1781330000	ENSG00000262655	ENSG00000108061	ENSG00000262655_ENSG00000108061	ENSG00000108061_ENSG00000262655	SPON1	SHOC2	14115428	110966607	-95428	33393	2.65801	Inf	3	1
182877	3132	chr11	chr1	30540000	31810000	1834160000	31810000	ENSG00000066382	ENSG00000134668	ENSG00000066382_ENSG00000134668	ENSG00000134668_ENSG00000066382	MPPED2	SPOCD1	30485682	31803236	54318	6764	3.47756	Inf	5	0
184770	55677	chr11	chr3	49470000	68100000	1853090000	558240000	ENSG00000086205	ENSG00000183662	ENSG00000086205_ENSG00000183662	ENSG00000183662_ENSG00000086205	FOLH1	TAFA1	49176865	68274934	293135	-174934	3.6994	Inf	6	0
186701	4647	chr11	chr1	68780000	46960000	1872400000	46960000	ENSG00000110090	ENSG00000187048	ENSG00000110090_ENSG00000187048	ENSG00000187048_ENSG00000110090	CPT1A	CYP4A11	68799515	46935330	-19515	24670	2.65801	Inf	3	1
186701	16334	chr11	chr1	68780000	163830000	1872400000	163830000	ENSG00000110090	ENSG00000143228	ENSG00000110090_ENSG00000143228	ENSG00000143228_ENSG00000110090	CPT1A	NUF2	68799515	163311170	-19515	518830	2.65801	Inf	3	1
186701	16721	chr11	chr1	68780000	167700000	1872400000	167700000	ENSG00000110090	ENSG00000198771	ENSG00000110090_ENSG00000198771	ENSG00000198771_ENSG00000110090	CPT1A	RCSD1	68799515	167669394	-19515	30606	2.65801	Inf	3	1
186701	17056	chr11	chr1	68780000	171050000	1872400000	171050000	ENSG00000110090	ENSG00000117501	ENSG00000110090_ENSG00000117501	ENSG00000117501_ENSG00000110090	CPT1A	MROH9	68799515	171000118	-19515	49882	2.65801	Inf	3	1
186701	17058	chr11	chr1	68780000	171070000	1872400000	171070000	ENSG00000110090	ENSG00000007933	ENSG00000110090_ENSG00000007933	ENSG00000007933_ENSG00000110090	CPT1A	FMO3	68799515	171104360	-19515	-34360	2.65801	Inf	3	1
186701	21854	chr11	chr1	68780000	219030000	1872400000	219030000	ENSG00000110090	ENSG00000143353	ENSG00000110090_ENSG00000143353	ENSG00000143353_ENSG00000110090	CPT1A	LYPLAL1	68799515	219193367	-19515	-163367	2.65801	Inf	3	1
186701	25228	chr11	chr2	68780000	4810000	1872400000	253260000	ENSG00000110090	ENSG00000176887	ENSG00000110090_ENSG00000176887	ENSG00000176887_ENSG00000110090	CPT1A	SOX11	68799515	5696884	-19515	-886884	2.65801	Inf	3	1
186701	50034	chr11	chr3	68780000	11670000	1872400000	501810000	ENSG00000110090	ENSG00000144560	ENSG00000110090_ENSG00000144560	ENSG00000144560_ENSG00000110090	CPT1A	VGLL4	68799515	11663710	-19515	6290	2.65801	Inf	3	1
186701	50058	chr11	chr3	68780000	11910000	1872400000	502050000	ENSG00000110090	ENSG00000144559	ENSG00000110090_ENSG00000144559	ENSG00000144559_ENSG00000110090	CPT1A	TAMM41	68799515	11818680	-19515	91320	2.65801	Inf	3	1
186701	51748	chr11	chr3	68780000	28810000	1872400000	518950000	ENSG00000110090	ENSG00000283563	ENSG00000110090_ENSG00000283563	ENSG00000283563_ENSG00000110090	CPT1A	AC098650.1	68799515	29058358	-19515	-248358	2.65801	Inf	3	1
186701	52175	chr11	chr3	68780000	33080000	1872400000	523220000	ENSG00000110090	ENSG00000188167	ENSG00000110090_ENSG00000188167	ENSG00000188167_ENSG00000110090	CPT1A	TMPPE	68799515	33093784	-19515	-13784	2.65801	Inf	3	1
186701	63247	chr11	chr3	68780000	143800000	1872400000	633940000	ENSG00000110090	ENSG00000181744	ENSG00000110090_ENSG00000181744	ENSG00000181744_ENSG00000110090	CPT1A	DIPK2A	68799515	144010258	-19515	-210258	2.65801	Inf	3	1
186701	68051	chr11	chr3	68780000	191840000	1872400000	681980000	ENSG00000110090	ENSG00000253548	ENSG00000110090_ENSG00000253548	ENSG00000253548_ENSG00000110090	CPT1A	PYDC2	68799515	191461310	-19515	378690	2.65801	Inf	3	1
186701	71844	chr11	chr4	68780000	32470000	1872400000	720400000	ENSG00000110090	ENSG00000169851	ENSG00000110090_ENSG00000169851	ENSG00000169851_ENSG00000110090	CPT1A	PCDH7	68799515	30933610	-19515	1536390	2.65801	Inf	3	1
186701	86574	chr11	chr4	68780000	179770000	1872400000	867700000	ENSG00000110090	ENSG00000038002	ENSG00000110090_ENSG00000038002	ENSG00000038002_ENSG00000110090	CPT1A	AGA	68799515	177436606	-19515	2333394	2.65801	Inf	3	1
186701	89134	chr11	chr5	68780000	16150000	1872400000	893790000	ENSG00000110090	ENSG00000183654	ENSG00000110090_ENSG00000183654	ENSG00000183654_ENSG00000110090	CPT1A	2021-03-11	68799515	16123950	-19515	26050	2.65801	Inf	3	1
186701	89828	chr11	chr5	68780000	23090000	1872400000	900730000	ENSG00000110090	ENSG00000164256	ENSG00000110090_ENSG00000164256	ENSG00000164256_ENSG00000110090	CPT1A	PRDM9	68799515	23486092	-19515	-396092	2.65801	Inf	3	1
186701	101840	chr11	chr5	68780000	143210000	1872400000	1020850000	ENSG00000110090	ENSG00000113580	ENSG00000110090_ENSG00000113580	ENSG00000113580_ENSG00000110090	CPT1A	NR3C1	68799515	143356722	-19515	-146722	2.65801	Inf	3	1
186701	106738	chr11	chr6	68780000	11650000	1872400000	1070320000	ENSG00000110090	ENSG00000205269	ENSG00000110090_ENSG00000205269	ENSG00000205269_ENSG00000110090	CPT1A	TMEM170B	68799515	11560636	-19515	89364	2.65801	Inf	3	1
186701	106747	chr11	chr6	68780000	11740000	1872400000	1070410000	ENSG00000110090	ENSG00000111863	ENSG00000110090_ENSG00000111863	ENSG00000111863_ENSG00000110090	CPT1A	ADTRP	68799515	11759550	-19515	-19550	2.65801	Inf	3	1
186701	120362	chr11	chr6	68780000	147890000	1872400000	1206560000	ENSG00000110090	ENSG00000203727	ENSG00000110090_ENSG00000203727	ENSG00000203727_ENSG00000110090	CPT1A	SAMD5	68799515	147623118	-19515	266882	2.65801	Inf	3	1
186701	123939	chr11	chr7	68780000	13850000	1872400000	1242820000	ENSG00000110090	ENSG00000006468	ENSG00000110090_ENSG00000006468	ENSG00000006468_ENSG00000110090	CPT1A	ETV1	68799515	13941327	-19515	-91327	2.65801	Inf	3	1
186701	132908	chr11	chr7	68780000	103540000	1872400000	1332510000	ENSG00000110090	ENSG00000170615	ENSG00000110090_ENSG00000170615	ENSG00000170615_ENSG00000110090	CPT1A	SLC26A5	68799515	103399454	-19515	140546	2.65801	Inf	3	1
186701	133680	chr11	chr7	68780000	111260000	1872400000	1340230000	ENSG00000110090	ENSG00000184903	ENSG00000110090_ENSG00000184903	ENSG00000184903_ENSG00000110090	CPT1A	IMMP2L	68799515	111112784	-19515	147216	2.65801	Inf	3	1
186701	134494	chr11	chr7	68780000	119400000	1872400000	1348370000	ENSG00000110090	ENSG00000106013	ENSG00000110090_ENSG00000106013	ENSG00000106013_ENSG00000110090	CPT1A	ANKRD7	68799515	118355420	-19515	1044580	2.65801	Inf	3	1
186701	134851	chr11	chr7	68780000	122970000	1872400000	1351940000	ENSG00000110090	ENSG00000128519	ENSG00000110090_ENSG00000128519	ENSG00000128519_ENSG00000110090	CPT1A	TAS2R16	68799515	122995202	-19515	-25202	2.65801	Inf	3	1
186701	137147	chr11	chr7	68780000	145930000	1872400000	1374900000	ENSG00000110090	ENSG00000196511	ENSG00000110090_ENSG00000196511	ENSG00000196511_ENSG00000110090	CPT1A	TPK1	68799515	144644168	-19515	1285832	2.65801	Inf	3	1
186701	139179	chr11	chr8	68780000	7900000	1872400000	1395710000	ENSG00000110090	ENSG00000171711	ENSG00000110090_ENSG00000171711	ENSG00000171711_ENSG00000110090	CPT1A	DEFB4A	68799515	7895670	-19515	4330	2.65801	Inf	3	1
186701	147985	chr11	chr8	68780000	95960000	1872400000	1483770000	ENSG00000110090	ENSG00000156466	ENSG00000110090_ENSG00000156466	ENSG00000156466_ENSG00000110090	CPT1A	GDF6	68799515	96151570	-19515	-191570	2.65801	Inf	3	1
186701	152113	chr11	chr8	68780000	137240000	1872400000	1525050000	ENSG00000110090	ENSG00000147724	ENSG00000110090_ENSG00000147724	ENSG00000147724_ENSG00000110090	CPT1A	FAM135B	68799515	138313642	-19515	-1073642	2.65801	Inf	3	1
186701	160196	chr11	chr9	68780000	73930000	1872400000	1606370000	ENSG00000110090	ENSG00000198963	ENSG00000110090_ENSG00000198963	ENSG00000198963_ENSG00000110090	CPT1A	RORB	68799515	74595256	-19515	-665256	2.65801	Inf	3	1
186701	160498	chr11	chr9	68780000	76950000	1872400000	1609390000	ENSG00000110090	ENSG00000204612	ENSG00000110090_ENSG00000204612	ENSG00000204612_ENSG00000110090	CPT1A	FOXB2	68799515	77020304	-19515	-70304	2.65801	Inf	3	1
186701	161805	chr11	chr9	68780000	90020000	1872400000	1622460000	ENSG00000110090	ENSG00000130222	ENSG00000110090_ENSG00000130222	ENSG00000130222_ENSG00000110090	CPT1A	GADD45G	68799515	89605784	-19515	414216	2.65801	Inf	3	1
186701	162022	chr11	chr9	68780000	92190000	1872400000	1624630000	ENSG00000110090	ENSG00000196305	ENSG00000110090_ENSG00000196305	ENSG00000196305_ENSG00000110090	CPT1A	IARS	68799515	92251982	-19515	-61982	2.65801	Inf	3	1
186701	164860	chr11	chr9	68780000	120570000	1872400000	1653010000	ENSG00000110090	ENSG00000136861	ENSG00000110090_ENSG00000136861	ENSG00000136861_ENSG00000110090	CPT1A	CDK5RAP2	68799515	120484520	-19515	85480	2.65801	Inf	3	1
186701	173040	chr11	chr10	68780000	64970000	1872400000	1735300000	ENSG00000110090	ENSG00000165476	ENSG00000110090_ENSG00000165476	ENSG00000165476_ENSG00000110090	CPT1A	REEP3	68799515	63573264	-19515	1396736	2.65801	Inf	3	1
186701	173126	chr11	chr10	68780000	65830000	1872400000	1736160000	ENSG00000110090	ENSG00000183230	ENSG00000110090_ENSG00000183230	ENSG00000183230_ENSG00000110090	CPT1A	CTNNA3	68799515	66804359	-19515	-974359	2.65801	Inf	3	1
186701	177483	chr11	chr10	68780000	109400000	1872400000	1779730000	ENSG00000110090	ENSG00000108039	ENSG00000110090_ENSG00000108039	ENSG00000108039_ENSG00000110090	CPT1A	XPNPEP1	68799515	109894160	-19515	-494160	2.65801	Inf	3	1
186701	177643	chr11	chr10	68780000	111000000	1872400000	1781330000	ENSG00000110090	ENSG00000108061	ENSG00000110090_ENSG00000108061	ENSG00000108061_ENSG00000110090	CPT1A	SHOC2	68799515	110966607	-19515	33393	2.65801	Inf	3	1
186701	181225	chr11	chr11	68780000	14020000	1872400000	1817640000	ENSG00000110090	ENSG00000262655	ENSG00000110090_ENSG00000262655	ENSG00000262655_ENSG00000110090	CPT1A	SPON1	68799515	14115428	-19515	-95428	2.65801	Inf	3	1
187660	173734	chr11	chr10	78370000	71910000	1881990000	1742240000	ENSG00000033327	ENSG00000197746	ENSG00000033327_ENSG00000197746	ENSG00000197746_ENSG00000033327	GAB2	PSAP	78316820	71833812	53180	76188	3.13513	Inf	4	0
189229	4647	chr11	chr1	94060000	46960000	1897680000	46960000	ENSG00000181333	ENSG00000187048	ENSG00000181333_ENSG00000187048	ENSG00000187048_ENSG00000181333	HEPHL1	CYP4A11	94067556	46935330	-7556	24670	2.65801	Inf	3	1
189229	16334	chr11	chr1	94060000	163830000	1897680000	163830000	ENSG00000181333	ENSG00000143228	ENSG00000181333_ENSG00000143228	ENSG00000143228_ENSG00000181333	HEPHL1	NUF2	94067556	163311170	-7556	518830	2.65801	Inf	3	1
189229	16721	chr11	chr1	94060000	167700000	1897680000	167700000	ENSG00000181333	ENSG00000198771	ENSG00000181333_ENSG00000198771	ENSG00000198771_ENSG00000181333	HEPHL1	RCSD1	94067556	167669394	-7556	30606	2.65801	Inf	3	1
189229	17056	chr11	chr1	94060000	171050000	1897680000	171050000	ENSG00000181333	ENSG00000117501	ENSG00000181333_ENSG00000117501	ENSG00000117501_ENSG00000181333	HEPHL1	MROH9	94067556	171000118	-7556	49882	2.65801	Inf	3	1
189229	17058	chr11	chr1	94060000	171070000	1897680000	171070000	ENSG00000181333	ENSG00000007933	ENSG00000181333_ENSG00000007933	ENSG00000007933_ENSG00000181333	HEPHL1	FMO3	94067556	171104360	-7556	-34360	2.65801	Inf	3	1
189229	21854	chr11	chr1	94060000	219030000	1897680000	219030000	ENSG00000181333	ENSG00000143353	ENSG00000181333_ENSG00000143353	ENSG00000143353_ENSG00000181333	HEPHL1	LYPLAL1	94067556	219193367	-7556	-163367	2.65801	Inf	3	1
189229	25228	chr11	chr2	94060000	4810000	1897680000	253260000	ENSG00000181333	ENSG00000176887	ENSG00000181333_ENSG00000176887	ENSG00000176887_ENSG00000181333	HEPHL1	SOX11	94067556	5696884	-7556	-886884	2.65801	Inf	3	1
189229	50034	chr11	chr3	94060000	11670000	1897680000	501810000	ENSG00000181333	ENSG00000144560	ENSG00000181333_ENSG00000144560	ENSG00000144560_ENSG00000181333	HEPHL1	VGLL4	94067556	11663710	-7556	6290	2.65801	Inf	3	1
189229	50058	chr11	chr3	94060000	11910000	1897680000	502050000	ENSG00000181333	ENSG00000144559	ENSG00000181333_ENSG00000144559	ENSG00000144559_ENSG00000181333	HEPHL1	TAMM41	94067556	11818680	-7556	91320	2.65801	Inf	3	1
189229	51748	chr11	chr3	94060000	28810000	1897680000	518950000	ENSG00000181333	ENSG00000283563	ENSG00000181333_ENSG00000283563	ENSG00000283563_ENSG00000181333	HEPHL1	AC098650.1	94067556	29058358	-7556	-248358	2.65801	Inf	3	1
189229	52175	chr11	chr3	94060000	33080000	1897680000	523220000	ENSG00000181333	ENSG00000188167	ENSG00000181333_ENSG00000188167	ENSG00000188167_ENSG00000181333	HEPHL1	TMPPE	94067556	33093784	-7556	-13784	2.65801	Inf	3	1
189229	63247	chr11	chr3	94060000	143800000	1897680000	633940000	ENSG00000181333	ENSG00000181744	ENSG00000181333_ENSG00000181744	ENSG00000181744_ENSG00000181333	HEPHL1	DIPK2A	94067556	144010258	-7556	-210258	2.65801	Inf	3	1
189229	68051	chr11	chr3	94060000	191840000	1897680000	681980000	ENSG00000181333	ENSG00000253548	ENSG00000181333_ENSG00000253548	ENSG00000253548_ENSG00000181333	HEPHL1	PYDC2	94067556	191461310	-7556	378690	2.65801	Inf	3	1
189229	71844	chr11	chr4	94060000	32470000	1897680000	720400000	ENSG00000181333	ENSG00000169851	ENSG00000181333_ENSG00000169851	ENSG00000169851_ENSG00000181333	HEPHL1	PCDH7	94067556	30933610	-7556	1536390	2.65801	Inf	3	1
189229	86574	chr11	chr4	94060000	179770000	1897680000	867700000	ENSG00000181333	ENSG00000038002	ENSG00000181333_ENSG00000038002	ENSG00000038002_ENSG00000181333	HEPHL1	AGA	94067556	177436606	-7556	2333394	2.65801	Inf	3	1
189229	89134	chr11	chr5	94060000	16150000	1897680000	893790000	ENSG00000181333	ENSG00000183654	ENSG00000181333_ENSG00000183654	ENSG00000183654_ENSG00000181333	HEPHL1	2021-03-11	94067556	16123950	-7556	26050	2.65801	Inf	3	1
189229	89828	chr11	chr5	94060000	23090000	1897680000	900730000	ENSG00000181333	ENSG00000164256	ENSG00000181333_ENSG00000164256	ENSG00000164256_ENSG00000181333	HEPHL1	PRDM9	94067556	23486092	-7556	-396092	2.65801	Inf	3	1
189229	101840	chr11	chr5	94060000	143210000	1897680000	1020850000	ENSG00000181333	ENSG00000113580	ENSG00000181333_ENSG00000113580	ENSG00000113580_ENSG00000181333	HEPHL1	NR3C1	94067556	143356722	-7556	-146722	2.65801	Inf	3	1
189229	106738	chr11	chr6	94060000	11650000	1897680000	1070320000	ENSG00000181333	ENSG00000205269	ENSG00000181333_ENSG00000205269	ENSG00000205269_ENSG00000181333	HEPHL1	TMEM170B	94067556	11560636	-7556	89364	2.65801	Inf	3	1
189229	106747	chr11	chr6	94060000	11740000	1897680000	1070410000	ENSG00000181333	ENSG00000111863	ENSG00000181333_ENSG00000111863	ENSG00000111863_ENSG00000181333	HEPHL1	ADTRP	94067556	11759550	-7556	-19550	2.65801	Inf	3	1
189229	120362	chr11	chr6	94060000	147890000	1897680000	1206560000	ENSG00000181333	ENSG00000203727	ENSG00000181333_ENSG00000203727	ENSG00000203727_ENSG00000181333	HEPHL1	SAMD5	94067556	147623118	-7556	266882	2.65801	Inf	3	1
189229	123939	chr11	chr7	94060000	13850000	1897680000	1242820000	ENSG00000181333	ENSG00000006468	ENSG00000181333_ENSG00000006468	ENSG00000006468_ENSG00000181333	HEPHL1	ETV1	94067556	13941327	-7556	-91327	2.65801	Inf	3	1
189229	132908	chr11	chr7	94060000	103540000	1897680000	1332510000	ENSG00000181333	ENSG00000170615	ENSG00000181333_ENSG00000170615	ENSG00000170615_ENSG00000181333	HEPHL1	SLC26A5	94067556	103399454	-7556	140546	2.65801	Inf	3	1
189229	133680	chr11	chr7	94060000	111260000	1897680000	1340230000	ENSG00000181333	ENSG00000184903	ENSG00000181333_ENSG00000184903	ENSG00000184903_ENSG00000181333	HEPHL1	IMMP2L	94067556	111112784	-7556	147216	2.65801	Inf	3	1
189229	134494	chr11	chr7	94060000	119400000	1897680000	1348370000	ENSG00000181333	ENSG00000106013	ENSG00000181333_ENSG00000106013	ENSG00000106013_ENSG00000181333	HEPHL1	ANKRD7	94067556	118355420	-7556	1044580	2.65801	Inf	3	1
189229	134851	chr11	chr7	94060000	122970000	1897680000	1351940000	ENSG00000181333	ENSG00000128519	ENSG00000181333_ENSG00000128519	ENSG00000128519_ENSG00000181333	HEPHL1	TAS2R16	94067556	122995202	-7556	-25202	2.65801	Inf	3	1
189229	137147	chr11	chr7	94060000	145930000	1897680000	1374900000	ENSG00000181333	ENSG00000196511	ENSG00000181333_ENSG00000196511	ENSG00000196511_ENSG00000181333	HEPHL1	TPK1	94067556	144644168	-7556	1285832	2.65801	Inf	3	1
189229	139179	chr11	chr8	94060000	7900000	1897680000	1395710000	ENSG00000181333	ENSG00000171711	ENSG00000181333_ENSG00000171711	ENSG00000171711_ENSG00000181333	HEPHL1	DEFB4A	94067556	7895670	-7556	4330	2.65801	Inf	3	1
189229	147985	chr11	chr8	94060000	95960000	1897680000	1483770000	ENSG00000181333	ENSG00000156466	ENSG00000181333_ENSG00000156466	ENSG00000156466_ENSG00000181333	HEPHL1	GDF6	94067556	96151570	-7556	-191570	2.65801	Inf	3	1
189229	152113	chr11	chr8	94060000	137240000	1897680000	1525050000	ENSG00000181333	ENSG00000147724	ENSG00000181333_ENSG00000147724	ENSG00000147724_ENSG00000181333	HEPHL1	FAM135B	94067556	138313642	-7556	-1073642	2.65801	Inf	3	1
189229	160196	chr11	chr9	94060000	73930000	1897680000	1606370000	ENSG00000181333	ENSG00000198963	ENSG00000181333_ENSG00000198963	ENSG00000198963_ENSG00000181333	HEPHL1	RORB	94067556	74595256	-7556	-665256	2.65801	Inf	3	1
189229	160498	chr11	chr9	94060000	76950000	1897680000	1609390000	ENSG00000181333	ENSG00000204612	ENSG00000181333_ENSG00000204612	ENSG00000204612_ENSG00000181333	HEPHL1	FOXB2	94067556	77020304	-7556	-70304	2.65801	Inf	3	1
189229	161805	chr11	chr9	94060000	90020000	1897680000	1622460000	ENSG00000181333	ENSG00000130222	ENSG00000181333_ENSG00000130222	ENSG00000130222_ENSG00000181333	HEPHL1	GADD45G	94067556	89605784	-7556	414216	2.65801	Inf	3	1
189229	162022	chr11	chr9	94060000	92190000	1897680000	1624630000	ENSG00000181333	ENSG00000196305	ENSG00000181333_ENSG00000196305	ENSG00000196305_ENSG00000181333	HEPHL1	IARS	94067556	92251982	-7556	-61982	2.65801	Inf	3	1
189229	164860	chr11	chr9	94060000	120570000	1897680000	1653010000	ENSG00000181333	ENSG00000136861	ENSG00000181333_ENSG00000136861	ENSG00000136861_ENSG00000181333	HEPHL1	CDK5RAP2	94067556	120484520	-7556	85480	2.65801	Inf	3	1
189229	173040	chr11	chr10	94060000	64970000	1897680000	1735300000	ENSG00000181333	ENSG00000165476	ENSG00000181333_ENSG00000165476	ENSG00000165476_ENSG00000181333	HEPHL1	REEP3	94067556	63573264	-7556	1396736	2.65801	Inf	3	1
189229	173126	chr11	chr10	94060000	65830000	1897680000	1736160000	ENSG00000181333	ENSG00000183230	ENSG00000181333_ENSG00000183230	ENSG00000183230_ENSG00000181333	HEPHL1	CTNNA3	94067556	66804359	-7556	-974359	2.65801	Inf	3	1
189229	177483	chr11	chr10	94060000	109400000	1897680000	1779730000	ENSG00000181333	ENSG00000108039	ENSG00000181333_ENSG00000108039	ENSG00000108039_ENSG00000181333	HEPHL1	XPNPEP1	94067556	109894160	-7556	-494160	2.65801	Inf	3	1
189229	177643	chr11	chr10	94060000	111000000	1897680000	1781330000	ENSG00000181333	ENSG00000108061	ENSG00000181333_ENSG00000108061	ENSG00000108061_ENSG00000181333	HEPHL1	SHOC2	94067556	110966607	-7556	33393	2.65801	Inf	3	1
189229	181225	chr11	chr11	94060000	14020000	1897680000	1817640000	ENSG00000181333	ENSG00000262655	ENSG00000181333_ENSG00000262655	ENSG00000262655_ENSG00000181333	HEPHL1	SPON1	94067556	14115428	-7556	-95428	2.65801	Inf	3	1
189229	186701	chr11	chr11	94060000	68780000	1897680000	1872400000	ENSG00000181333	ENSG00000110090	ENSG00000181333_ENSG00000110090	ENSG00000110090_ENSG00000181333	HEPHL1	CPT1A	94067556	68799515	-7556	-19515	2.65801	Inf	3	1
189642	4647	chr11	chr1	98190000	46960000	1901810000	46960000	ENSG00000149972	ENSG00000187048	ENSG00000149972_ENSG00000187048	ENSG00000187048_ENSG00000149972	CNTN5	CYP4A11	99689917	46935330	-1499917	24670	2.65801	Inf	3	1
189642	16334	chr11	chr1	98190000	163830000	1901810000	163830000	ENSG00000149972	ENSG00000143228	ENSG00000149972_ENSG00000143228	ENSG00000143228_ENSG00000149972	CNTN5	NUF2	99689917	163311170	-1499917	518830	2.65801	Inf	3	1
189642	16721	chr11	chr1	98190000	167700000	1901810000	167700000	ENSG00000149972	ENSG00000198771	ENSG00000149972_ENSG00000198771	ENSG00000198771_ENSG00000149972	CNTN5	RCSD1	99689917	167669394	-1499917	30606	2.65801	Inf	3	1
189642	17056	chr11	chr1	98190000	171050000	1901810000	171050000	ENSG00000149972	ENSG00000117501	ENSG00000149972_ENSG00000117501	ENSG00000117501_ENSG00000149972	CNTN5	MROH9	99689917	171000118	-1499917	49882	2.65801	Inf	3	1
189642	17058	chr11	chr1	98190000	171070000	1901810000	171070000	ENSG00000149972	ENSG00000007933	ENSG00000149972_ENSG00000007933	ENSG00000007933_ENSG00000149972	CNTN5	FMO3	99689917	171104360	-1499917	-34360	2.65801	Inf	3	1
189642	21854	chr11	chr1	98190000	219030000	1901810000	219030000	ENSG00000149972	ENSG00000143353	ENSG00000149972_ENSG00000143353	ENSG00000143353_ENSG00000149972	CNTN5	LYPLAL1	99689917	219193367	-1499917	-163367	2.65801	Inf	3	1
189642	25228	chr11	chr2	98190000	4810000	1901810000	253260000	ENSG00000149972	ENSG00000176887	ENSG00000149972_ENSG00000176887	ENSG00000176887_ENSG00000149972	CNTN5	SOX11	99689917	5696884	-1499917	-886884	2.65801	Inf	3	1
189642	50034	chr11	chr3	98190000	11670000	1901810000	501810000	ENSG00000149972	ENSG00000144560	ENSG00000149972_ENSG00000144560	ENSG00000144560_ENSG00000149972	CNTN5	VGLL4	99689917	11663710	-1499917	6290	2.65801	Inf	3	1
189642	50058	chr11	chr3	98190000	11910000	1901810000	502050000	ENSG00000149972	ENSG00000144559	ENSG00000149972_ENSG00000144559	ENSG00000144559_ENSG00000149972	CNTN5	TAMM41	99689917	11818680	-1499917	91320	2.65801	Inf	3	1
189642	51748	chr11	chr3	98190000	28810000	1901810000	518950000	ENSG00000149972	ENSG00000283563	ENSG00000149972_ENSG00000283563	ENSG00000283563_ENSG00000149972	CNTN5	AC098650.1	99689917	29058358	-1499917	-248358	2.65801	Inf	3	1
189642	52175	chr11	chr3	98190000	33080000	1901810000	523220000	ENSG00000149972	ENSG00000188167	ENSG00000149972_ENSG00000188167	ENSG00000188167_ENSG00000149972	CNTN5	TMPPE	99689917	33093784	-1499917	-13784	2.65801	Inf	3	1
189642	63247	chr11	chr3	98190000	143800000	1901810000	633940000	ENSG00000149972	ENSG00000181744	ENSG00000149972_ENSG00000181744	ENSG00000181744_ENSG00000149972	CNTN5	DIPK2A	99689917	144010258	-1499917	-210258	2.65801	Inf	3	1
189642	68051	chr11	chr3	98190000	191840000	1901810000	681980000	ENSG00000149972	ENSG00000253548	ENSG00000149972_ENSG00000253548	ENSG00000253548_ENSG00000149972	CNTN5	PYDC2	99689917	191461310	-1499917	378690	2.65801	Inf	3	1
189642	71844	chr11	chr4	98190000	32470000	1901810000	720400000	ENSG00000149972	ENSG00000169851	ENSG00000149972_ENSG00000169851	ENSG00000169851_ENSG00000149972	CNTN5	PCDH7	99689917	30933610	-1499917	1536390	2.65801	Inf	3	1
189642	86574	chr11	chr4	98190000	179770000	1901810000	867700000	ENSG00000149972	ENSG00000038002	ENSG00000149972_ENSG00000038002	ENSG00000038002_ENSG00000149972	CNTN5	AGA	99689917	177436606	-1499917	2333394	2.65801	Inf	3	1
189642	89134	chr11	chr5	98190000	16150000	1901810000	893790000	ENSG00000149972	ENSG00000183654	ENSG00000149972_ENSG00000183654	ENSG00000183654_ENSG00000149972	CNTN5	2021-03-11	99689917	16123950	-1499917	26050	2.65801	Inf	3	1
189642	89828	chr11	chr5	98190000	23090000	1901810000	900730000	ENSG00000149972	ENSG00000164256	ENSG00000149972_ENSG00000164256	ENSG00000164256_ENSG00000149972	CNTN5	PRDM9	99689917	23486092	-1499917	-396092	2.65801	Inf	3	1
189642	101840	chr11	chr5	98190000	143210000	1901810000	1020850000	ENSG00000149972	ENSG00000113580	ENSG00000149972_ENSG00000113580	ENSG00000113580_ENSG00000149972	CNTN5	NR3C1	99689917	143356722	-1499917	-146722	2.65801	Inf	3	1
189642	106738	chr11	chr6	98190000	11650000	1901810000	1070320000	ENSG00000149972	ENSG00000205269	ENSG00000149972_ENSG00000205269	ENSG00000205269_ENSG00000149972	CNTN5	TMEM170B	99689917	11560636	-1499917	89364	2.65801	Inf	3	1
189642	106747	chr11	chr6	98190000	11740000	1901810000	1070410000	ENSG00000149972	ENSG00000111863	ENSG00000149972_ENSG00000111863	ENSG00000111863_ENSG00000149972	CNTN5	ADTRP	99689917	11759550	-1499917	-19550	2.65801	Inf	3	1
189642	120362	chr11	chr6	98190000	147890000	1901810000	1206560000	ENSG00000149972	ENSG00000203727	ENSG00000149972_ENSG00000203727	ENSG00000203727_ENSG00000149972	CNTN5	SAMD5	99689917	147623118	-1499917	266882	2.65801	Inf	3	1
189642	123939	chr11	chr7	98190000	13850000	1901810000	1242820000	ENSG00000149972	ENSG00000006468	ENSG00000149972_ENSG00000006468	ENSG00000006468_ENSG00000149972	CNTN5	ETV1	99689917	13941327	-1499917	-91327	2.65801	Inf	3	1
189642	132908	chr11	chr7	98190000	103540000	1901810000	1332510000	ENSG00000149972	ENSG00000170615	ENSG00000149972_ENSG00000170615	ENSG00000170615_ENSG00000149972	CNTN5	SLC26A5	99689917	103399454	-1499917	140546	2.65801	Inf	3	1
189642	133680	chr11	chr7	98190000	111260000	1901810000	1340230000	ENSG00000149972	ENSG00000184903	ENSG00000149972_ENSG00000184903	ENSG00000184903_ENSG00000149972	CNTN5	IMMP2L	99689917	111112784	-1499917	147216	2.65801	Inf	3	1
189642	134494	chr11	chr7	98190000	119400000	1901810000	1348370000	ENSG00000149972	ENSG00000106013	ENSG00000149972_ENSG00000106013	ENSG00000106013_ENSG00000149972	CNTN5	ANKRD7	99689917	118355420	-1499917	1044580	2.65801	Inf	3	1
189642	134851	chr11	chr7	98190000	122970000	1901810000	1351940000	ENSG00000149972	ENSG00000128519	ENSG00000149972_ENSG00000128519	ENSG00000128519_ENSG00000149972	CNTN5	TAS2R16	99689917	122995202	-1499917	-25202	2.65801	Inf	3	1
189642	137147	chr11	chr7	98190000	145930000	1901810000	1374900000	ENSG00000149972	ENSG00000196511	ENSG00000149972_ENSG00000196511	ENSG00000196511_ENSG00000149972	CNTN5	TPK1	99689917	144644168	-1499917	1285832	2.65801	Inf	3	1
189642	139179	chr11	chr8	98190000	7900000	1901810000	1395710000	ENSG00000149972	ENSG00000171711	ENSG00000149972_ENSG00000171711	ENSG00000171711_ENSG00000149972	CNTN5	DEFB4A	99689917	7895670	-1499917	4330	2.65801	Inf	3	1
189642	147985	chr11	chr8	98190000	95960000	1901810000	1483770000	ENSG00000149972	ENSG00000156466	ENSG00000149972_ENSG00000156466	ENSG00000156466_ENSG00000149972	CNTN5	GDF6	99689917	96151570	-1499917	-191570	2.65801	Inf	3	1
189642	152113	chr11	chr8	98190000	137240000	1901810000	1525050000	ENSG00000149972	ENSG00000147724	ENSG00000149972_ENSG00000147724	ENSG00000147724_ENSG00000149972	CNTN5	FAM135B	99689917	138313642	-1499917	-1073642	2.65801	Inf	3	1
189642	160196	chr11	chr9	98190000	73930000	1901810000	1606370000	ENSG00000149972	ENSG00000198963	ENSG00000149972_ENSG00000198963	ENSG00000198963_ENSG00000149972	CNTN5	RORB	99689917	74595256	-1499917	-665256	2.65801	Inf	3	1
189642	160498	chr11	chr9	98190000	76950000	1901810000	1609390000	ENSG00000149972	ENSG00000204612	ENSG00000149972_ENSG00000204612	ENSG00000204612_ENSG00000149972	CNTN5	FOXB2	99689917	77020304	-1499917	-70304	2.65801	Inf	3	1
189642	161805	chr11	chr9	98190000	90020000	1901810000	1622460000	ENSG00000149972	ENSG00000130222	ENSG00000149972_ENSG00000130222	ENSG00000130222_ENSG00000149972	CNTN5	GADD45G	99689917	89605784	-1499917	414216	2.65801	Inf	3	1
189642	162022	chr11	chr9	98190000	92190000	1901810000	1624630000	ENSG00000149972	ENSG00000196305	ENSG00000149972_ENSG00000196305	ENSG00000196305_ENSG00000149972	CNTN5	IARS	99689917	92251982	-1499917	-61982	2.65801	Inf	3	1
189642	164860	chr11	chr9	98190000	120570000	1901810000	1653010000	ENSG00000149972	ENSG00000136861	ENSG00000149972_ENSG00000136861	ENSG00000136861_ENSG00000149972	CNTN5	CDK5RAP2	99689917	120484520	-1499917	85480	2.65801	Inf	3	1
189642	173040	chr11	chr10	98190000	64970000	1901810000	1735300000	ENSG00000149972	ENSG00000165476	ENSG00000149972_ENSG00000165476	ENSG00000165476_ENSG00000149972	CNTN5	REEP3	99689917	63573264	-1499917	1396736	2.65801	Inf	3	1
189642	173126	chr11	chr10	98190000	65830000	1901810000	1736160000	ENSG00000149972	ENSG00000183230	ENSG00000149972_ENSG00000183230	ENSG00000183230_ENSG00000149972	CNTN5	CTNNA3	99689917	66804359	-1499917	-974359	2.65801	Inf	3	1
189642	177483	chr11	chr10	98190000	109400000	1901810000	1779730000	ENSG00000149972	ENSG00000108039	ENSG00000149972_ENSG00000108039	ENSG00000108039_ENSG00000149972	CNTN5	XPNPEP1	99689917	109894160	-1499917	-494160	2.65801	Inf	3	1
189642	177643	chr11	chr10	98190000	111000000	1901810000	1781330000	ENSG00000149972	ENSG00000108061	ENSG00000149972_ENSG00000108061	ENSG00000108061_ENSG00000149972	CNTN5	SHOC2	99689917	110966607	-1499917	33393	2.65801	Inf	3	1
189642	181225	chr11	chr11	98190000	14020000	1901810000	1817640000	ENSG00000149972	ENSG00000262655	ENSG00000149972_ENSG00000262655	ENSG00000262655_ENSG00000149972	CNTN5	SPON1	99689917	14115428	-1499917	-95428	2.65801	Inf	3	1
189642	186701	chr11	chr11	98190000	68780000	1901810000	1872400000	ENSG00000149972	ENSG00000110090	ENSG00000149972_ENSG00000110090	ENSG00000110090_ENSG00000149972	CNTN5	CPT1A	99689917	68799515	-1499917	-19515	2.65801	Inf	3	1
189642	189229	chr11	chr11	98190000	94060000	1901810000	1897680000	ENSG00000149972	ENSG00000181333	ENSG00000149972_ENSG00000181333	ENSG00000181333_ENSG00000149972	CNTN5	HEPHL1	99689917	94067556	-1499917	-7556	2.65801	Inf	3	1
190390	190106	chr11	chr11	105670000	102830000	1909290000	1906450000	ENSG00000152578	ENSG00000149968	ENSG00000152578_ENSG00000149968	ENSG00000149968_ENSG00000152578	GRIA4	MMP3	105796043	102839705	-126043	-9705	2.65801	Inf	3	0
193106	2962	chr11	chr1	132830000	30110000	1936450000	30110000	ENSG00000183715	ENSG00000162510	ENSG00000183715_ENSG00000162510	ENSG00000162510_ENSG00000183715	OPCML	MATN1	132973748	30717431	-143748	-607431	3.13513	Inf	4	2
193106	4506	chr11	chr1	132830000	45550000	1936450000	45550000	ENSG00000183715	ENSG00000117448	ENSG00000183715_ENSG00000117448	ENSG00000117448_ENSG00000183715	OPCML	AKR1A1	132973748	45560296	-143748	-10296	3.13513	Inf	4	2
193106	5484	chr11	chr1	132830000	55330000	1936450000	55330000	ENSG00000183715	ENSG00000162402	ENSG00000183715_ENSG00000162402	ENSG00000162402_ENSG00000183715	OPCML	USP24	132973748	55140862	-143748	189138	3.13513	Inf	4	2
193106	15328	chr11	chr1	132830000	153770000	1936450000	153770000	ENSG00000183715	ENSG00000143554	ENSG00000183715_ENSG00000143554	ENSG00000143554_ENSG00000183715	OPCML	SLC27A3	132973748	153777256	-143748	-7256	3.13513	Inf	4	2
193106	34736	chr11	chr2	132830000	99890000	1936450000	348340000	ENSG00000183715	ENSG00000144218	ENSG00000183715_ENSG00000144218	ENSG00000144218_ENSG00000183715	OPCML	AFF3	132973748	99844079	-143748	45921	3.13513	Inf	4	2
193106	35141	chr11	chr2	132830000	103940000	1936450000	352390000	ENSG00000183715	ENSG00000198914	ENSG00000183715_ENSG00000198914	ENSG00000198914_ENSG00000183715	OPCML	POU3F3	132973748	104857042	-143748	-917042	3.13513	Inf	4	2
193106	39264	chr11	chr2	132830000	145170000	1936450000	393620000	ENSG00000183715	ENSG00000169554	ENSG00000183715_ENSG00000169554	ENSG00000169554_ENSG00000183715	OPCML	ZEB2	132973748	144442710	-143748	727290	3.13513	Inf	4	2
193106	71577	chr11	chr4	132830000	29800000	1936450000	717730000	ENSG00000183715	ENSG00000169851	ENSG00000183715_ENSG00000169851	ENSG00000169851_ENSG00000183715	OPCML	PCDH7	132973748	30933610	-143748	-1133610	3.13513	Inf	4	0
193106	78926	chr11	chr4	132830000	103290000	1936450000	791220000	ENSG00000183715	ENSG00000138778	ENSG00000183715_ENSG00000138778	ENSG00000138778_ENSG00000183715	OPCML	CENPE	132973748	103152108	-143748	137892	3.13513	Inf	4	2
193106	86737	chr11	chr4	132830000	181400000	1936450000	869330000	ENSG00000183715	ENSG00000218336	ENSG00000183715_ENSG00000218336	ENSG00000218336_ENSG00000183715	OPCML	TENM3	132973748	182473506	-143748	-1073506	3.13513	Inf	4	2
193106	121945	chr11	chr6	132830000	163720000	1936450000	1222390000	ENSG00000183715	ENSG00000112531	ENSG00000183715_ENSG00000112531	ENSG00000112531_ENSG00000183715	OPCML	QKI	132973748	163496296	-143748	223704	3.13513	Inf	4	2
193106	134157	chr11	chr7	132830000	116030000	1936450000	1345000000	ENSG00000183715	ENSG00000105967	ENSG00000183715_ENSG00000105967	ENSG00000105967_ENSG00000183715	OPCML	TFEC	132973748	116047522	-143748	-17522	3.13513	Inf	4	2
193106	138438	chr11	chr7	132830000	158840000	1936450000	1387810000	ENSG00000183715	ENSG00000117868	ENSG00000183715_ENSG00000117868	ENSG00000117868_ENSG00000183715	OPCML	ESYT2	132973748	158780624	-143748	59376	3.13513	Inf	4	2
193106	149179	chr11	chr8	132830000	107900000	1936450000	1495710000	ENSG00000183715	ENSG00000147655	ENSG00000183715_ENSG00000147655	ENSG00000147655_ENSG00000183715	OPCML	RSPO2	132973748	107991479	-143748	-91479	3.13513	Inf	4	2
193106	154400	chr11	chr9	132830000	15970000	1936450000	1548410000	ENSG00000183715	ENSG00000164989	ENSG00000183715_ENSG00000164989	ENSG00000164989_ENSG00000183715	OPCML	CCDC171	132973748	15807353	-143748	162647	3.13513	Inf	4	2
195948	35246	chr12	chr2	27160000	104990000	1965360000	353440000	ENSG00000214700	ENSG00000135972	ENSG00000214700_ENSG00000135972	ENSG00000135972_ENSG00000214700	C12orf71	MRPS9	27081786	105069014	78214	-79014	3.13513	Inf	4	0
195948	45509	chr12	chr2	27160000	207620000	1965360000	456070000	ENSG00000214700	ENSG00000144401	ENSG00000214700_ENSG00000144401	ENSG00000144401_ENSG00000214700	C12orf71	METTL21A	27081786	207603280	78214	16720	3.13513	Inf	4	0
195948	47652	chr12	chr2	27160000	229050000	1965360000	477500000	ENSG00000214700	ENSG00000153823	ENSG00000214700_ENSG00000153823	ENSG00000153823_ENSG00000214700	C12orf71	PID1	27081786	229060906	78214	-10906	3.13513	Inf	4	0
195948	130108	chr12	chr7	27160000	75540000	1965360000	1304510000	ENSG00000214700	ENSG00000170092	ENSG00000214700_ENSG00000170092	ENSG00000170092_ENSG00000214700	C12orf71	SPDYE5	27081786	75498964	78214	41036	3.13513	Inf	4	0
197319	28201	chr12	chr2	40870000	34540000	1979070000	282990000	ENSG00000018236	ENSG00000119812	ENSG00000018236_ENSG00000119812	ENSG00000119812_ENSG00000018236	CNTN1	FAM98A	40882427	33591521	-12427	948479	2.02119	Inf	2	5
197319	30442	chr12	chr2	40870000	56950000	1979070000	305400000	ENSG00000018236	ENSG00000055813	ENSG00000018236_ENSG00000055813	ENSG00000055813_ENSG00000018236	CNTN1	CCDC85A	40882427	56285081	-12427	664919	2.02119	Inf	2	5
197319	48694	chr12	chr2	40870000	239470000	1979070000	487920000	ENSG00000018236	ENSG00000068024	ENSG00000018236_ENSG00000068024	ENSG00000068024_ENSG00000018236	CNTN1	HDAC4	40882427	239224911	-12427	245089	2.02119	Inf	2	5
197319	48711	chr12	chr2	40870000	239640000	1979070000	488090000	ENSG00000018236	ENSG00000130414	ENSG00000018236_ENSG00000130414	ENSG00000130414_ENSG00000018236	CNTN1	NDUFA10	40882427	239958898	-12427	-318898	2.02119	Inf	2	5
197319	99357	chr12	chr5	40870000	118380000	1979070000	996020000	ENSG00000018236	ENSG00000169570	ENSG00000018236_ENSG00000169570	ENSG00000169570_ENSG00000018236	CNTN1	DTWD2	40882427	118912310	-12427	-532310	2.02119	Inf	2	5
197319	135101	chr12	chr7	40870000	125470000	1979070000	1354440000	ENSG00000018236	ENSG00000128513	ENSG00000018236_ENSG00000128513	ENSG00000128513_ENSG00000018236	CNTN1	POT1	40882427	124876184	-12427	593816	2.02119	Inf	2	5
197319	152347	chr12	chr8	40870000	139580000	1979070000	1527390000	ENSG00000018236	ENSG00000169427	ENSG00000018236_ENSG00000169427	ENSG00000169427_ENSG00000018236	CNTN1	KCNK9	40882427	139652474	-12427	-72474	2.02119	Inf	2	5
197319	153385	chr12	chr9	40870000	5820000	1979070000	1538260000	ENSG00000018236	ENSG00000099219	ENSG00000018236_ENSG00000099219	ENSG00000099219_ENSG00000018236	CNTN1	ERMP1	40882427	5799096	-12427	20904	2.02119	Inf	2	5
197319	153951	chr12	chr9	40870000	11480000	1979070000	1543920000	ENSG00000018236	ENSG00000107165	ENSG00000018236_ENSG00000107165	ENSG00000107165_ENSG00000018236	CNTN1	TYRP1	40882427	12697864	-12427	-1217864	2.02119	Inf	2	5
197923	9813	chr12	chr1	46910000	98620000	1985110000	98620000	ENSG00000139209	ENSG00000162627	ENSG00000139209_ENSG00000162627	ENSG00000162627_ENSG00000139209	SLC38A4	SNX7	46798584	98711100	111416	-91100	3.13513	Inf	4	3
197923	38953	chr12	chr2	46910000	142060000	1985110000	390510000	ENSG00000139209	ENSG00000168702	ENSG00000139209_ENSG00000168702	ENSG00000168702_ENSG00000139209	SLC38A4	LRP1B	46798584	141181562	111416	878438	3.13513	Inf	4	3
197923	56142	chr12	chr3	46910000	72750000	1985110000	562890000	ENSG00000139209	ENSG00000144736	ENSG00000139209_ENSG00000144736	ENSG00000144736_ENSG00000139209	SLC38A4	SHQ1	46798584	72805596	111416	-55596	3.13513	Inf	4	3
197923	131715	chr12	chr7	46910000	91610000	1985110000	1320580000	ENSG00000139209	ENSG00000127989	ENSG00000139209_ENSG00000127989	ENSG00000127989_ENSG00000139209	SLC38A4	MTERF1	46798584	91786364	111416	-176364	3.13513	Inf	4	3
197923	147652	chr12	chr8	46910000	92630000	1985110000	1480440000	ENSG00000139209	ENSG00000205133	ENSG00000139209_ENSG00000205133	ENSG00000205133_ENSG00000139209	SLC38A4	TRIQK	46798584	92950602	111416	-320602	3.13513	Inf	4	3
197923	148013	chr12	chr8	46910000	96240000	1985110000	1484050000	ENSG00000139209	ENSG00000156467	ENSG00000139209_ENSG00000156467	ENSG00000156467_ENSG00000139209	SLC38A4	UQCRB	46798584	96230777	111416	9223	3.13513	Inf	4	3
197923	148189	chr12	chr8	46910000	98000000	1985110000	1485810000	ENSG00000139209	ENSG00000156482	ENSG00000139209_ENSG00000156482	ENSG00000156482_ENSG00000139209	SLC38A4	RPL30	46798584	98035660	111416	-35660	3.13513	Inf	4	3
197923	148773	chr12	chr8	46910000	103840000	1985110000	1491650000	ENSG00000139209	ENSG00000176406	ENSG00000139209_ENSG00000176406	ENSG00000176406_ENSG00000139209	SLC38A4	RIMS2	46798584	103878395	111416	-38395	3.13513	Inf	4	3
197923	149388	chr12	chr8	46910000	109990000	1985110000	1497800000	ENSG00000139209	ENSG00000164794	ENSG00000139209_ENSG00000164794	ENSG00000164794_ENSG00000139209	SLC38A4	KCNV1	46798584	109969704	111416	20296	3.13513	Inf	4	3
197923	153672	chr12	chr9	46910000	8690000	1985110000	1541130000	ENSG00000139209	ENSG00000153707	ENSG00000139209_ENSG00000153707	ENSG00000153707_ENSG00000139209	SLC38A4	PTPRD	46798584	9463484	111416	-773484	3.13513	Inf	4	3
197923	154677	chr12	chr9	46910000	18740000	1985110000	1551180000	ENSG00000139209	ENSG00000155875	ENSG00000139209_ENSG00000155875	ENSG00000155875_ENSG00000139209	SLC38A4	SAXO1	46798584	18954132	111416	-214132	3.13513	Inf	4	3
202449	4647	chr12	chr1	92170000	46960000	2030370000	46960000	ENSG00000133639	ENSG00000187048	ENSG00000133639_ENSG00000187048	ENSG00000187048_ENSG00000133639	BTG1	CYP4A11	92143062	46935330	26938	24670	2.65801	Inf	3	1
202449	16334	chr12	chr1	92170000	163830000	2030370000	163830000	ENSG00000133639	ENSG00000143228	ENSG00000133639_ENSG00000143228	ENSG00000143228_ENSG00000133639	BTG1	NUF2	92143062	163311170	26938	518830	2.65801	Inf	3	1
202449	16721	chr12	chr1	92170000	167700000	2030370000	167700000	ENSG00000133639	ENSG00000198771	ENSG00000133639_ENSG00000198771	ENSG00000198771_ENSG00000133639	BTG1	RCSD1	92143062	167669394	26938	30606	2.65801	Inf	3	1
202449	17056	chr12	chr1	92170000	171050000	2030370000	171050000	ENSG00000133639	ENSG00000117501	ENSG00000133639_ENSG00000117501	ENSG00000117501_ENSG00000133639	BTG1	MROH9	92143062	171000118	26938	49882	2.65801	Inf	3	1
202449	17058	chr12	chr1	92170000	171070000	2030370000	171070000	ENSG00000133639	ENSG00000007933	ENSG00000133639_ENSG00000007933	ENSG00000007933_ENSG00000133639	BTG1	FMO3	92143062	171104360	26938	-34360	2.65801	Inf	3	1
202449	21854	chr12	chr1	92170000	219030000	2030370000	219030000	ENSG00000133639	ENSG00000143353	ENSG00000133639_ENSG00000143353	ENSG00000143353_ENSG00000133639	BTG1	LYPLAL1	92143062	219193367	26938	-163367	2.65801	Inf	3	1
202449	25228	chr12	chr2	92170000	4810000	2030370000	253260000	ENSG00000133639	ENSG00000176887	ENSG00000133639_ENSG00000176887	ENSG00000176887_ENSG00000133639	BTG1	SOX11	92143062	5696884	26938	-886884	2.65801	Inf	3	1
202449	50034	chr12	chr3	92170000	11670000	2030370000	501810000	ENSG00000133639	ENSG00000144560	ENSG00000133639_ENSG00000144560	ENSG00000144560_ENSG00000133639	BTG1	VGLL4	92143062	11663710	26938	6290	2.65801	Inf	3	1
202449	50058	chr12	chr3	92170000	11910000	2030370000	502050000	ENSG00000133639	ENSG00000144559	ENSG00000133639_ENSG00000144559	ENSG00000144559_ENSG00000133639	BTG1	TAMM41	92143062	11818680	26938	91320	2.65801	Inf	3	1
202449	51748	chr12	chr3	92170000	28810000	2030370000	518950000	ENSG00000133639	ENSG00000283563	ENSG00000133639_ENSG00000283563	ENSG00000283563_ENSG00000133639	BTG1	AC098650.1	92143062	29058358	26938	-248358	2.65801	Inf	3	1
202449	52175	chr12	chr3	92170000	33080000	2030370000	523220000	ENSG00000133639	ENSG00000188167	ENSG00000133639_ENSG00000188167	ENSG00000188167_ENSG00000133639	BTG1	TMPPE	92143062	33093784	26938	-13784	2.65801	Inf	3	1
202449	63247	chr12	chr3	92170000	143800000	2030370000	633940000	ENSG00000133639	ENSG00000181744	ENSG00000133639_ENSG00000181744	ENSG00000181744_ENSG00000133639	BTG1	DIPK2A	92143062	144010258	26938	-210258	2.65801	Inf	3	1
202449	68051	chr12	chr3	92170000	191840000	2030370000	681980000	ENSG00000133639	ENSG00000253548	ENSG00000133639_ENSG00000253548	ENSG00000253548_ENSG00000133639	BTG1	PYDC2	92143062	191461310	26938	378690	2.65801	Inf	3	1
202449	71844	chr12	chr4	92170000	32470000	2030370000	720400000	ENSG00000133639	ENSG00000169851	ENSG00000133639_ENSG00000169851	ENSG00000169851_ENSG00000133639	BTG1	PCDH7	92143062	30933610	26938	1536390	2.65801	Inf	3	1
202449	86574	chr12	chr4	92170000	179770000	2030370000	867700000	ENSG00000133639	ENSG00000038002	ENSG00000133639_ENSG00000038002	ENSG00000038002_ENSG00000133639	BTG1	AGA	92143062	177436606	26938	2333394	2.65801	Inf	3	1
202449	89134	chr12	chr5	92170000	16150000	2030370000	893790000	ENSG00000133639	ENSG00000183654	ENSG00000133639_ENSG00000183654	ENSG00000183654_ENSG00000133639	BTG1	2021-03-11	92143062	16123950	26938	26050	2.65801	Inf	3	1
202449	89828	chr12	chr5	92170000	23090000	2030370000	900730000	ENSG00000133639	ENSG00000164256	ENSG00000133639_ENSG00000164256	ENSG00000164256_ENSG00000133639	BTG1	PRDM9	92143062	23486092	26938	-396092	2.65801	Inf	3	1
202449	101840	chr12	chr5	92170000	143210000	2030370000	1020850000	ENSG00000133639	ENSG00000113580	ENSG00000133639_ENSG00000113580	ENSG00000113580_ENSG00000133639	BTG1	NR3C1	92143062	143356722	26938	-146722	2.65801	Inf	3	1
202449	106738	chr12	chr6	92170000	11650000	2030370000	1070320000	ENSG00000133639	ENSG00000205269	ENSG00000133639_ENSG00000205269	ENSG00000205269_ENSG00000133639	BTG1	TMEM170B	92143062	11560636	26938	89364	2.65801	Inf	3	1
202449	106747	chr12	chr6	92170000	11740000	2030370000	1070410000	ENSG00000133639	ENSG00000111863	ENSG00000133639_ENSG00000111863	ENSG00000111863_ENSG00000133639	BTG1	ADTRP	92143062	11759550	26938	-19550	2.65801	Inf	3	1
202449	120362	chr12	chr6	92170000	147890000	2030370000	1206560000	ENSG00000133639	ENSG00000203727	ENSG00000133639_ENSG00000203727	ENSG00000203727_ENSG00000133639	BTG1	SAMD5	92143062	147623118	26938	266882	2.65801	Inf	3	1
202449	123939	chr12	chr7	92170000	13850000	2030370000	1242820000	ENSG00000133639	ENSG00000006468	ENSG00000133639_ENSG00000006468	ENSG00000006468_ENSG00000133639	BTG1	ETV1	92143062	13941327	26938	-91327	2.65801	Inf	3	1
202449	132908	chr12	chr7	92170000	103540000	2030370000	1332510000	ENSG00000133639	ENSG00000170615	ENSG00000133639_ENSG00000170615	ENSG00000170615_ENSG00000133639	BTG1	SLC26A5	92143062	103399454	26938	140546	2.65801	Inf	3	1
202449	133680	chr12	chr7	92170000	111260000	2030370000	1340230000	ENSG00000133639	ENSG00000184903	ENSG00000133639_ENSG00000184903	ENSG00000184903_ENSG00000133639	BTG1	IMMP2L	92143062	111112784	26938	147216	2.65801	Inf	3	1
202449	134494	chr12	chr7	92170000	119400000	2030370000	1348370000	ENSG00000133639	ENSG00000106013	ENSG00000133639_ENSG00000106013	ENSG00000106013_ENSG00000133639	BTG1	ANKRD7	92143062	118355420	26938	1044580	2.65801	Inf	3	1
202449	134851	chr12	chr7	92170000	122970000	2030370000	1351940000	ENSG00000133639	ENSG00000128519	ENSG00000133639_ENSG00000128519	ENSG00000128519_ENSG00000133639	BTG1	TAS2R16	92143062	122995202	26938	-25202	2.65801	Inf	3	1
202449	137147	chr12	chr7	92170000	145930000	2030370000	1374900000	ENSG00000133639	ENSG00000196511	ENSG00000133639_ENSG00000196511	ENSG00000196511_ENSG00000133639	BTG1	TPK1	92143062	144644168	26938	1285832	2.65801	Inf	3	1
202449	139179	chr12	chr8	92170000	7900000	2030370000	1395710000	ENSG00000133639	ENSG00000171711	ENSG00000133639_ENSG00000171711	ENSG00000171711_ENSG00000133639	BTG1	DEFB4A	92143062	7895670	26938	4330	2.65801	Inf	3	1
202449	147985	chr12	chr8	92170000	95960000	2030370000	1483770000	ENSG00000133639	ENSG00000156466	ENSG00000133639_ENSG00000156466	ENSG00000156466_ENSG00000133639	BTG1	GDF6	92143062	96151570	26938	-191570	2.65801	Inf	3	1
202449	152113	chr12	chr8	92170000	137240000	2030370000	1525050000	ENSG00000133639	ENSG00000147724	ENSG00000133639_ENSG00000147724	ENSG00000147724_ENSG00000133639	BTG1	FAM135B	92143062	138313642	26938	-1073642	2.65801	Inf	3	1
202449	160196	chr12	chr9	92170000	73930000	2030370000	1606370000	ENSG00000133639	ENSG00000198963	ENSG00000133639_ENSG00000198963	ENSG00000198963_ENSG00000133639	BTG1	RORB	92143062	74595256	26938	-665256	2.65801	Inf	3	1
202449	160498	chr12	chr9	92170000	76950000	2030370000	1609390000	ENSG00000133639	ENSG00000204612	ENSG00000133639_ENSG00000204612	ENSG00000204612_ENSG00000133639	BTG1	FOXB2	92143062	77020304	26938	-70304	2.65801	Inf	3	1
202449	161805	chr12	chr9	92170000	90020000	2030370000	1622460000	ENSG00000133639	ENSG00000130222	ENSG00000133639_ENSG00000130222	ENSG00000130222_ENSG00000133639	BTG1	GADD45G	92143062	89605784	26938	414216	2.65801	Inf	3	1
202449	162022	chr12	chr9	92170000	92190000	2030370000	1624630000	ENSG00000133639	ENSG00000196305	ENSG00000133639_ENSG00000196305	ENSG00000196305_ENSG00000133639	BTG1	IARS	92143062	92251982	26938	-61982	2.65801	Inf	3	1
202449	164860	chr12	chr9	92170000	120570000	2030370000	1653010000	ENSG00000133639	ENSG00000136861	ENSG00000133639_ENSG00000136861	ENSG00000136861_ENSG00000133639	BTG1	CDK5RAP2	92143062	120484520	26938	85480	2.65801	Inf	3	1
202449	173040	chr12	chr10	92170000	64970000	2030370000	1735300000	ENSG00000133639	ENSG00000165476	ENSG00000133639_ENSG00000165476	ENSG00000165476_ENSG00000133639	BTG1	REEP3	92143062	63573264	26938	1396736	2.65801	Inf	3	1
202449	173126	chr12	chr10	92170000	65830000	2030370000	1736160000	ENSG00000133639	ENSG00000183230	ENSG00000133639_ENSG00000183230	ENSG00000183230_ENSG00000133639	BTG1	CTNNA3	92143062	66804359	26938	-974359	2.65801	Inf	3	1
202449	177483	chr12	chr10	92170000	109400000	2030370000	1779730000	ENSG00000133639	ENSG00000108039	ENSG00000133639_ENSG00000108039	ENSG00000108039_ENSG00000133639	BTG1	XPNPEP1	92143062	109894160	26938	-494160	2.65801	Inf	3	1
202449	177643	chr12	chr10	92170000	111000000	2030370000	1781330000	ENSG00000133639	ENSG00000108061	ENSG00000133639_ENSG00000108061	ENSG00000108061_ENSG00000133639	BTG1	SHOC2	92143062	110966607	26938	33393	2.65801	Inf	3	1
202449	181225	chr12	chr11	92170000	14020000	2030370000	1817640000	ENSG00000133639	ENSG00000262655	ENSG00000133639_ENSG00000262655	ENSG00000262655_ENSG00000133639	BTG1	SPON1	92143062	14115428	26938	-95428	2.65801	Inf	3	1
202449	186701	chr12	chr11	92170000	68780000	2030370000	1872400000	ENSG00000133639	ENSG00000110090	ENSG00000133639_ENSG00000110090	ENSG00000110090_ENSG00000133639	BTG1	CPT1A	92143062	68799515	26938	-19515	2.65801	Inf	3	1
202449	189229	chr12	chr11	92170000	94060000	2030370000	1897680000	ENSG00000133639	ENSG00000181333	ENSG00000133639_ENSG00000181333	ENSG00000181333_ENSG00000133639	BTG1	HEPHL1	92143062	94067556	26938	-7556	2.65801	Inf	3	1
202449	189642	chr12	chr11	92170000	98190000	2030370000	1901810000	ENSG00000133639	ENSG00000149972	ENSG00000133639_ENSG00000149972	ENSG00000149972_ENSG00000133639	BTG1	CNTN5	92143062	99689917	26938	-1499917	2.65801	Inf	3	1
204516	87990	chr12	chr5	112840000	4710000	2051040000	882350000	ENSG00000089127	ENSG00000145536	ENSG00000089127_ENSG00000145536	ENSG00000145536_ENSG00000089127	AC004551.1	ADAMTS16	112920002	5230317	-80002	-520317	3.47756	Inf	5	0
204516	137496	chr12	chr7	112840000	149420000	2051040000	1378390000	ENSG00000089127	ENSG00000196453	ENSG00000089127_ENSG00000196453	ENSG00000196453_ENSG00000089127	AC004551.1	ZNF777	112920002	149446212	-80002	-26212	3.47756	Inf	5	0
204516	137515	chr12	chr7	112840000	149610000	2051040000	1378580000	ENSG00000089127	ENSG00000133619	ENSG00000089127_ENSG00000133619	ENSG00000133619_ENSG00000089127	AC004551.1	KRBA1	112920002	149724678	-80002	-114678	3.47756	Inf	5	0
204526	87990	chr12	chr5	112940000	4710000	2051140000	882350000	ENSG00000111331	ENSG00000145536	ENSG00000111331_ENSG00000145536	ENSG00000145536_ENSG00000111331	OAS3	ADAMTS16	112955848	5230317	-15848	-520317	3.47756	Inf	5	0
204526	137496	chr12	chr7	112940000	149420000	2051140000	1378390000	ENSG00000111331	ENSG00000196453	ENSG00000111331_ENSG00000196453	ENSG00000196453_ENSG00000111331	OAS3	ZNF777	112955848	149446212	-15848	-26212	3.47756	Inf	5	0
204526	137515	chr12	chr7	112940000	149610000	2051140000	1378580000	ENSG00000111331	ENSG00000133619	ENSG00000111331_ENSG00000133619	ENSG00000133619_ENSG00000111331	OAS3	KRBA1	112955848	149724678	-15848	-114678	3.47756	Inf	5	0
206033	4647	chr12	chr1	128010000	46960000	2066210000	46960000	ENSG00000181234	ENSG00000187048	ENSG00000181234_ENSG00000187048	ENSG00000187048_ENSG00000181234	TMEM132C	CYP4A11	128487659	46935330	-477659	24670	2.65801	Inf	3	1
206033	16334	chr12	chr1	128010000	163830000	2066210000	163830000	ENSG00000181234	ENSG00000143228	ENSG00000181234_ENSG00000143228	ENSG00000143228_ENSG00000181234	TMEM132C	NUF2	128487659	163311170	-477659	518830	2.65801	Inf	3	1
206033	16721	chr12	chr1	128010000	167700000	2066210000	167700000	ENSG00000181234	ENSG00000198771	ENSG00000181234_ENSG00000198771	ENSG00000198771_ENSG00000181234	TMEM132C	RCSD1	128487659	167669394	-477659	30606	2.65801	Inf	3	1
206033	17056	chr12	chr1	128010000	171050000	2066210000	171050000	ENSG00000181234	ENSG00000117501	ENSG00000181234_ENSG00000117501	ENSG00000117501_ENSG00000181234	TMEM132C	MROH9	128487659	171000118	-477659	49882	2.65801	Inf	3	1
206033	17058	chr12	chr1	128010000	171070000	2066210000	171070000	ENSG00000181234	ENSG00000007933	ENSG00000181234_ENSG00000007933	ENSG00000007933_ENSG00000181234	TMEM132C	FMO3	128487659	171104360	-477659	-34360	2.65801	Inf	3	1
206033	21854	chr12	chr1	128010000	219030000	2066210000	219030000	ENSG00000181234	ENSG00000143353	ENSG00000181234_ENSG00000143353	ENSG00000143353_ENSG00000181234	TMEM132C	LYPLAL1	128487659	219193367	-477659	-163367	2.65801	Inf	3	1
206033	25228	chr12	chr2	128010000	4810000	2066210000	253260000	ENSG00000181234	ENSG00000176887	ENSG00000181234_ENSG00000176887	ENSG00000176887_ENSG00000181234	TMEM132C	SOX11	128487659	5696884	-477659	-886884	2.65801	Inf	3	1
206033	50034	chr12	chr3	128010000	11670000	2066210000	501810000	ENSG00000181234	ENSG00000144560	ENSG00000181234_ENSG00000144560	ENSG00000144560_ENSG00000181234	TMEM132C	VGLL4	128487659	11663710	-477659	6290	2.65801	Inf	3	1
206033	50058	chr12	chr3	128010000	11910000	2066210000	502050000	ENSG00000181234	ENSG00000144559	ENSG00000181234_ENSG00000144559	ENSG00000144559_ENSG00000181234	TMEM132C	TAMM41	128487659	11818680	-477659	91320	2.65801	Inf	3	1
206033	51748	chr12	chr3	128010000	28810000	2066210000	518950000	ENSG00000181234	ENSG00000283563	ENSG00000181234_ENSG00000283563	ENSG00000283563_ENSG00000181234	TMEM132C	AC098650.1	128487659	29058358	-477659	-248358	2.65801	Inf	3	1
206033	52175	chr12	chr3	128010000	33080000	2066210000	523220000	ENSG00000181234	ENSG00000188167	ENSG00000181234_ENSG00000188167	ENSG00000188167_ENSG00000181234	TMEM132C	TMPPE	128487659	33093784	-477659	-13784	2.65801	Inf	3	1
206033	63247	chr12	chr3	128010000	143800000	2066210000	633940000	ENSG00000181234	ENSG00000181744	ENSG00000181234_ENSG00000181744	ENSG00000181744_ENSG00000181234	TMEM132C	DIPK2A	128487659	144010258	-477659	-210258	2.65801	Inf	3	1
206033	68051	chr12	chr3	128010000	191840000	2066210000	681980000	ENSG00000181234	ENSG00000253548	ENSG00000181234_ENSG00000253548	ENSG00000253548_ENSG00000181234	TMEM132C	PYDC2	128487659	191461310	-477659	378690	2.65801	Inf	3	1
206033	71844	chr12	chr4	128010000	32470000	2066210000	720400000	ENSG00000181234	ENSG00000169851	ENSG00000181234_ENSG00000169851	ENSG00000169851_ENSG00000181234	TMEM132C	PCDH7	128487659	30933610	-477659	1536390	2.65801	Inf	3	1
206033	86574	chr12	chr4	128010000	179770000	2066210000	867700000	ENSG00000181234	ENSG00000038002	ENSG00000181234_ENSG00000038002	ENSG00000038002_ENSG00000181234	TMEM132C	AGA	128487659	177436606	-477659	2333394	2.65801	Inf	3	1
206033	89134	chr12	chr5	128010000	16150000	2066210000	893790000	ENSG00000181234	ENSG00000183654	ENSG00000181234_ENSG00000183654	ENSG00000183654_ENSG00000181234	TMEM132C	2021-03-11	128487659	16123950	-477659	26050	2.65801	Inf	3	1
206033	89828	chr12	chr5	128010000	23090000	2066210000	900730000	ENSG00000181234	ENSG00000164256	ENSG00000181234_ENSG00000164256	ENSG00000164256_ENSG00000181234	TMEM132C	PRDM9	128487659	23486092	-477659	-396092	2.65801	Inf	3	1
206033	101840	chr12	chr5	128010000	143210000	2066210000	1020850000	ENSG00000181234	ENSG00000113580	ENSG00000181234_ENSG00000113580	ENSG00000113580_ENSG00000181234	TMEM132C	NR3C1	128487659	143356722	-477659	-146722	2.65801	Inf	3	1
206033	106738	chr12	chr6	128010000	11650000	2066210000	1070320000	ENSG00000181234	ENSG00000205269	ENSG00000181234_ENSG00000205269	ENSG00000205269_ENSG00000181234	TMEM132C	TMEM170B	128487659	11560636	-477659	89364	2.65801	Inf	3	1
206033	106747	chr12	chr6	128010000	11740000	2066210000	1070410000	ENSG00000181234	ENSG00000111863	ENSG00000181234_ENSG00000111863	ENSG00000111863_ENSG00000181234	TMEM132C	ADTRP	128487659	11759550	-477659	-19550	2.65801	Inf	3	1
206033	120362	chr12	chr6	128010000	147890000	2066210000	1206560000	ENSG00000181234	ENSG00000203727	ENSG00000181234_ENSG00000203727	ENSG00000203727_ENSG00000181234	TMEM132C	SAMD5	128487659	147623118	-477659	266882	2.65801	Inf	3	1
206033	123939	chr12	chr7	128010000	13850000	2066210000	1242820000	ENSG00000181234	ENSG00000006468	ENSG00000181234_ENSG00000006468	ENSG00000006468_ENSG00000181234	TMEM132C	ETV1	128487659	13941327	-477659	-91327	2.65801	Inf	3	1
206033	132908	chr12	chr7	128010000	103540000	2066210000	1332510000	ENSG00000181234	ENSG00000170615	ENSG00000181234_ENSG00000170615	ENSG00000170615_ENSG00000181234	TMEM132C	SLC26A5	128487659	103399454	-477659	140546	2.65801	Inf	3	1
206033	133680	chr12	chr7	128010000	111260000	2066210000	1340230000	ENSG00000181234	ENSG00000184903	ENSG00000181234_ENSG00000184903	ENSG00000184903_ENSG00000181234	TMEM132C	IMMP2L	128487659	111112784	-477659	147216	2.65801	Inf	3	1
206033	134494	chr12	chr7	128010000	119400000	2066210000	1348370000	ENSG00000181234	ENSG00000106013	ENSG00000181234_ENSG00000106013	ENSG00000106013_ENSG00000181234	TMEM132C	ANKRD7	128487659	118355420	-477659	1044580	2.65801	Inf	3	1
206033	134851	chr12	chr7	128010000	122970000	2066210000	1351940000	ENSG00000181234	ENSG00000128519	ENSG00000181234_ENSG00000128519	ENSG00000128519_ENSG00000181234	TMEM132C	TAS2R16	128487659	122995202	-477659	-25202	2.65801	Inf	3	1
206033	137147	chr12	chr7	128010000	145930000	2066210000	1374900000	ENSG00000181234	ENSG00000196511	ENSG00000181234_ENSG00000196511	ENSG00000196511_ENSG00000181234	TMEM132C	TPK1	128487659	144644168	-477659	1285832	2.65801	Inf	3	1
206033	139179	chr12	chr8	128010000	7900000	2066210000	1395710000	ENSG00000181234	ENSG00000171711	ENSG00000181234_ENSG00000171711	ENSG00000171711_ENSG00000181234	TMEM132C	DEFB4A	128487659	7895670	-477659	4330	2.65801	Inf	3	1
206033	147985	chr12	chr8	128010000	95960000	2066210000	1483770000	ENSG00000181234	ENSG00000156466	ENSG00000181234_ENSG00000156466	ENSG00000156466_ENSG00000181234	TMEM132C	GDF6	128487659	96151570	-477659	-191570	2.65801	Inf	3	1
206033	152113	chr12	chr8	128010000	137240000	2066210000	1525050000	ENSG00000181234	ENSG00000147724	ENSG00000181234_ENSG00000147724	ENSG00000147724_ENSG00000181234	TMEM132C	FAM135B	128487659	138313642	-477659	-1073642	2.65801	Inf	3	1
206033	160196	chr12	chr9	128010000	73930000	2066210000	1606370000	ENSG00000181234	ENSG00000198963	ENSG00000181234_ENSG00000198963	ENSG00000198963_ENSG00000181234	TMEM132C	RORB	128487659	74595256	-477659	-665256	2.65801	Inf	3	1
206033	160498	chr12	chr9	128010000	76950000	2066210000	1609390000	ENSG00000181234	ENSG00000204612	ENSG00000181234_ENSG00000204612	ENSG00000204612_ENSG00000181234	TMEM132C	FOXB2	128487659	77020304	-477659	-70304	2.65801	Inf	3	1
206033	161805	chr12	chr9	128010000	90020000	2066210000	1622460000	ENSG00000181234	ENSG00000130222	ENSG00000181234_ENSG00000130222	ENSG00000130222_ENSG00000181234	TMEM132C	GADD45G	128487659	89605784	-477659	414216	2.65801	Inf	3	1
206033	162022	chr12	chr9	128010000	92190000	2066210000	1624630000	ENSG00000181234	ENSG00000196305	ENSG00000181234_ENSG00000196305	ENSG00000196305_ENSG00000181234	TMEM132C	IARS	128487659	92251982	-477659	-61982	2.65801	Inf	3	1
206033	164860	chr12	chr9	128010000	120570000	2066210000	1653010000	ENSG00000181234	ENSG00000136861	ENSG00000181234_ENSG00000136861	ENSG00000136861_ENSG00000181234	TMEM132C	CDK5RAP2	128487659	120484520	-477659	85480	2.65801	Inf	3	1
206033	173040	chr12	chr10	128010000	64970000	2066210000	1735300000	ENSG00000181234	ENSG00000165476	ENSG00000181234_ENSG00000165476	ENSG00000165476_ENSG00000181234	TMEM132C	REEP3	128487659	63573264	-477659	1396736	2.65801	Inf	3	1
206033	173126	chr12	chr10	128010000	65830000	2066210000	1736160000	ENSG00000181234	ENSG00000183230	ENSG00000181234_ENSG00000183230	ENSG00000183230_ENSG00000181234	TMEM132C	CTNNA3	128487659	66804359	-477659	-974359	2.65801	Inf	3	1
206033	177483	chr12	chr10	128010000	109400000	2066210000	1779730000	ENSG00000181234	ENSG00000108039	ENSG00000181234_ENSG00000108039	ENSG00000108039_ENSG00000181234	TMEM132C	XPNPEP1	128487659	109894160	-477659	-494160	2.65801	Inf	3	1
206033	177643	chr12	chr10	128010000	111000000	2066210000	1781330000	ENSG00000181234	ENSG00000108061	ENSG00000181234_ENSG00000108061	ENSG00000108061_ENSG00000181234	TMEM132C	SHOC2	128487659	110966607	-477659	33393	2.65801	Inf	3	1
206033	181225	chr12	chr11	128010000	14020000	2066210000	1817640000	ENSG00000181234	ENSG00000262655	ENSG00000181234_ENSG00000262655	ENSG00000262655_ENSG00000181234	TMEM132C	SPON1	128487659	14115428	-477659	-95428	2.65801	Inf	3	1
206033	186701	chr12	chr11	128010000	68780000	2066210000	1872400000	ENSG00000181234	ENSG00000110090	ENSG00000181234_ENSG00000110090	ENSG00000110090_ENSG00000181234	TMEM132C	CPT1A	128487659	68799515	-477659	-19515	2.65801	Inf	3	1
206033	189229	chr12	chr11	128010000	94060000	2066210000	1897680000	ENSG00000181234	ENSG00000181333	ENSG00000181234_ENSG00000181333	ENSG00000181333_ENSG00000181234	TMEM132C	HEPHL1	128487659	94067556	-477659	-7556	2.65801	Inf	3	1
206033	189642	chr12	chr11	128010000	98190000	2066210000	1901810000	ENSG00000181234	ENSG00000149972	ENSG00000181234_ENSG00000149972	ENSG00000149972_ENSG00000181234	TMEM132C	CNTN5	128487659	99689917	-477659	-1499917	2.65801	Inf	3	1
206033	202449	chr12	chr12	128010000	92170000	2066210000	2030370000	ENSG00000181234	ENSG00000133639	ENSG00000181234_ENSG00000133639	ENSG00000133639_ENSG00000181234	TMEM132C	BTG1	128487659	92143062	-477659	26938	2.65801	Inf	3	1
206388	2962	chr12	chr1	131560000	30110000	2069760000	30110000	ENSG00000061936	ENSG00000162510	ENSG00000061936_ENSG00000162510	ENSG00000162510_ENSG00000061936	SFSWAP	MATN1	131755409	30717431	-195409	-607431	3.13513	Inf	4	2
206388	4506	chr12	chr1	131560000	45550000	2069760000	45550000	ENSG00000061936	ENSG00000117448	ENSG00000061936_ENSG00000117448	ENSG00000117448_ENSG00000061936	SFSWAP	AKR1A1	131755409	45560296	-195409	-10296	3.13513	Inf	4	2
206388	5484	chr12	chr1	131560000	55330000	2069760000	55330000	ENSG00000061936	ENSG00000162402	ENSG00000061936_ENSG00000162402	ENSG00000162402_ENSG00000061936	SFSWAP	USP24	131755409	55140862	-195409	189138	3.13513	Inf	4	2
206388	15328	chr12	chr1	131560000	153770000	2069760000	153770000	ENSG00000061936	ENSG00000143554	ENSG00000061936_ENSG00000143554	ENSG00000143554_ENSG00000061936	SFSWAP	SLC27A3	131755409	153777256	-195409	-7256	3.13513	Inf	4	2
206388	34736	chr12	chr2	131560000	99890000	2069760000	348340000	ENSG00000061936	ENSG00000144218	ENSG00000061936_ENSG00000144218	ENSG00000144218_ENSG00000061936	SFSWAP	AFF3	131755409	99844079	-195409	45921	3.13513	Inf	4	2
206388	35141	chr12	chr2	131560000	103940000	2069760000	352390000	ENSG00000061936	ENSG00000198914	ENSG00000061936_ENSG00000198914	ENSG00000198914_ENSG00000061936	SFSWAP	POU3F3	131755409	104857042	-195409	-917042	3.13513	Inf	4	2
206388	39264	chr12	chr2	131560000	145170000	2069760000	393620000	ENSG00000061936	ENSG00000169554	ENSG00000061936_ENSG00000169554	ENSG00000169554_ENSG00000061936	SFSWAP	ZEB2	131755409	144442710	-195409	727290	3.13513	Inf	4	2
206388	71577	chr12	chr4	131560000	29800000	2069760000	717730000	ENSG00000061936	ENSG00000169851	ENSG00000061936_ENSG00000169851	ENSG00000169851_ENSG00000061936	SFSWAP	PCDH7	131755409	30933610	-195409	-1133610	3.13513	Inf	4	0
206388	78926	chr12	chr4	131560000	103290000	2069760000	791220000	ENSG00000061936	ENSG00000138778	ENSG00000061936_ENSG00000138778	ENSG00000138778_ENSG00000061936	SFSWAP	CENPE	131755409	103152108	-195409	137892	3.13513	Inf	4	2
206388	86737	chr12	chr4	131560000	181400000	2069760000	869330000	ENSG00000061936	ENSG00000218336	ENSG00000061936_ENSG00000218336	ENSG00000218336_ENSG00000061936	SFSWAP	TENM3	131755409	182473506	-195409	-1073506	3.13513	Inf	4	2
206388	121945	chr12	chr6	131560000	163720000	2069760000	1222390000	ENSG00000061936	ENSG00000112531	ENSG00000061936_ENSG00000112531	ENSG00000112531_ENSG00000061936	SFSWAP	QKI	131755409	163496296	-195409	223704	3.13513	Inf	4	2
206388	134157	chr12	chr7	131560000	116030000	2069760000	1345000000	ENSG00000061936	ENSG00000105967	ENSG00000061936_ENSG00000105967	ENSG00000105967_ENSG00000061936	SFSWAP	TFEC	131755409	116047522	-195409	-17522	3.13513	Inf	4	2
206388	138438	chr12	chr7	131560000	158840000	2069760000	1387810000	ENSG00000061936	ENSG00000117868	ENSG00000061936_ENSG00000117868	ENSG00000117868_ENSG00000061936	SFSWAP	ESYT2	131755409	158780624	-195409	59376	3.13513	Inf	4	2
206388	149179	chr12	chr8	131560000	107900000	2069760000	1495710000	ENSG00000061936	ENSG00000147655	ENSG00000061936_ENSG00000147655	ENSG00000147655_ENSG00000061936	SFSWAP	RSPO2	131755409	107991479	-195409	-91479	3.13513	Inf	4	2
206388	154400	chr12	chr9	131560000	15970000	2069760000	1548410000	ENSG00000061936	ENSG00000164989	ENSG00000061936_ENSG00000164989	ENSG00000164989_ENSG00000061936	SFSWAP	CCDC171	131755409	15807353	-195409	162647	3.13513	Inf	4	2
206388	193106	chr12	chr11	131560000	132830000	2069760000	1936450000	ENSG00000061936	ENSG00000183715	ENSG00000061936_ENSG00000183715	ENSG00000183715_ENSG00000061936	SFSWAP	OPCML	131755409	132973748	-195409	-143748	3.13513	Inf	4	2
206509	3132	chr12	chr1	132770000	31810000	2070970000	31810000	ENSG00000176915	ENSG00000134668	ENSG00000176915_ENSG00000134668	ENSG00000134668_ENSG00000176915	ANKLE2	SPOCD1	132743668	31803236	26332	6764	3.47756	Inf	5	0
206509	110638	chr12	chr6	132770000	50650000	2070970000	1109320000	ENSG00000176915	ENSG00000008197	ENSG00000176915_ENSG00000008197	ENSG00000008197_ENSG00000176915	ANKLE2	TFAP2D	132743668	50743408	26332	-93408	2.15534	Inf	5	0
206509	143110	chr12	chr8	132770000	47210000	2070970000	1435020000	ENSG00000176915	ENSG00000164808	ENSG00000176915_ENSG00000164808	ENSG00000164808_ENSG00000176915	ANKLE2	SPIDR	132743668	47498440	26332	-288440	2.15534	Inf	5	0
206509	182877	chr12	chr11	132770000	30540000	2070970000	1834160000	ENSG00000176915	ENSG00000066382	ENSG00000176915_ENSG00000066382	ENSG00000066382_ENSG00000176915	ANKLE2	MPPED2	132743668	30485682	26332	54318	3.47756	Inf	5	0
210732	173734	chr13	chr10	42720000	71910000	2113690000	1742240000	ENSG00000179813	ENSG00000197746	ENSG00000179813_ENSG00000197746	ENSG00000197746_ENSG00000179813	FAM216B	PSAP	42786550	71833812	-66550	76188	3.13513	Inf	4	0
210732	187660	chr13	chr11	42720000	78370000	2113690000	1881990000	ENSG00000179813	ENSG00000033327	ENSG00000179813_ENSG00000033327	ENSG00000033327_ENSG00000179813	FAM216B	GAB2	42786550	78316820	-66550	53180	3.13513	Inf	4	0
215726	51451	chr13	chr3	92660000	25840000	2163630000	515980000	ENSG00000179399	ENSG00000151093	ENSG00000179399_ENSG00000151093	ENSG00000151093_ENSG00000179399	GPC5	OXSM	92136152	25788726	523848	51274	3.13513	Inf	4	0
215726	108346	chr13	chr6	92660000	27730000	2163630000	1086400000	ENSG00000179399	ENSG00000185130	ENSG00000179399_ENSG00000185130	ENSG00000185130_ENSG00000179399	GPC5	HIST1H2BL	92136152	27807688	523848	-77688	3.13513	Inf	4	0
215726	168641	chr13	chr10	92660000	20980000	2163630000	1691310000	ENSG00000179399	ENSG00000078114	ENSG00000179399_ENSG00000078114	ENSG00000078114_ENSG00000179399	GPC5	NEBL	92136152	20977080	523848	2920	3.13513	Inf	4	0
215726	168650	chr13	chr10	92660000	21070000	2163630000	1691400000	ENSG00000179399	ENSG00000204683	ENSG00000179399_ENSG00000204683	ENSG00000204683_ENSG00000179399	GPC5	C10orf113	92136152	21136161	523848	-66161	3.13513	Inf	4	0
216450	28201	chr13	chr2	99900000	34540000	2170870000	282990000	ENSG00000139800	ENSG00000119812	ENSG00000139800_ENSG00000119812	ENSG00000119812_ENSG00000139800	ZIC5	FAM98A	99967436	33591521	-67436	948479	2.02119	Inf	2	5
216450	30442	chr13	chr2	99900000	56950000	2170870000	305400000	ENSG00000139800	ENSG00000055813	ENSG00000139800_ENSG00000055813	ENSG00000055813_ENSG00000139800	ZIC5	CCDC85A	99967436	56285081	-67436	664919	2.02119	Inf	2	5
216450	48694	chr13	chr2	99900000	239470000	2170870000	487920000	ENSG00000139800	ENSG00000068024	ENSG00000139800_ENSG00000068024	ENSG00000068024_ENSG00000139800	ZIC5	HDAC4	99967436	239224911	-67436	245089	2.02119	Inf	2	5
216450	48711	chr13	chr2	99900000	239640000	2170870000	488090000	ENSG00000139800	ENSG00000130414	ENSG00000139800_ENSG00000130414	ENSG00000130414_ENSG00000139800	ZIC5	NDUFA10	99967436	239958898	-67436	-318898	2.02119	Inf	2	5
216450	99357	chr13	chr5	99900000	118380000	2170870000	996020000	ENSG00000139800	ENSG00000169570	ENSG00000139800_ENSG00000169570	ENSG00000169570_ENSG00000139800	ZIC5	DTWD2	99967436	118912310	-67436	-532310	2.02119	Inf	2	5
216450	135101	chr13	chr7	99900000	125470000	2170870000	1354440000	ENSG00000139800	ENSG00000128513	ENSG00000139800_ENSG00000128513	ENSG00000128513_ENSG00000139800	ZIC5	POT1	99967436	124876184	-67436	593816	2.02119	Inf	2	5
216450	152347	chr13	chr8	99900000	139580000	2170870000	1527390000	ENSG00000139800	ENSG00000169427	ENSG00000139800_ENSG00000169427	ENSG00000169427_ENSG00000139800	ZIC5	KCNK9	99967436	139652474	-67436	-72474	2.02119	Inf	2	5
216450	153385	chr13	chr9	99900000	5820000	2170870000	1538260000	ENSG00000139800	ENSG00000099219	ENSG00000139800_ENSG00000099219	ENSG00000099219_ENSG00000139800	ZIC5	ERMP1	99967436	5799096	-67436	20904	2.02119	Inf	2	5
216450	153951	chr13	chr9	99900000	11480000	2170870000	1543920000	ENSG00000139800	ENSG00000107165	ENSG00000139800_ENSG00000107165	ENSG00000107165_ENSG00000139800	ZIC5	TYRP1	99967436	12697864	-67436	-1217864	2.02119	Inf	2	5
216450	197319	chr13	chr12	99900000	40870000	2170870000	1979070000	ENSG00000139800	ENSG00000018236	ENSG00000139800_ENSG00000018236	ENSG00000018236_ENSG00000139800	ZIC5	CNTN1	99967436	40882427	-67436	-12427	2.02119	Inf	2	5
216741	15425	chr13	chr1	102810000	154740000	2173780000	154740000	ENSG00000134897	ENSG00000143603	ENSG00000134897_ENSG00000143603	ENSG00000143603_ENSG00000134897	BIVM	KCNN3	102820326	154783868	-10326	-43868	3.13513	Inf	4	0
216741	19576	chr13	chr1	102810000	196250000	2173780000	196250000	ENSG00000134897	ENSG00000162687	ENSG00000134897_ENSG00000162687	ENSG00000162687_ENSG00000134897	BIVM	KCNT2	102820326	196417502	-10326	-167502	3.13513	Inf	4	0
216741	24877	chr13	chr2	102810000	1300000	2173780000	249750000	ENSG00000134897	ENSG00000172554	ENSG00000134897_ENSG00000172554	ENSG00000172554_ENSG00000134897	BIVM	SNTG2	102820326	1159231	-10326	140769	3.13513	Inf	4	0
216741	29341	chr13	chr2	102810000	45940000	2173780000	294390000	ENSG00000134897	ENSG00000171132	ENSG00000134897_ENSG00000171132	ENSG00000171132_ENSG00000134897	BIVM	PRKCE	102820326	45919668	-10326	20332	3.13513	Inf	4	0
216741	72946	chr13	chr4	102810000	43490000	2173780000	731420000	ENSG00000134897	ENSG00000215203	ENSG00000134897_ENSG00000215203	ENSG00000215203_ENSG00000134897	BIVM	GRXCR1	102820326	42961962	-10326	528038	3.13513	Inf	4	0
216856	190274	chr13	chr11	103960000	104510000	2174930000	1908130000	ENSG00000125255	ENSG00000196954	ENSG00000125255_ENSG00000196954	ENSG00000196954_ENSG00000125255	SLC10A2	CASP4	103055422	104956116	904578	-446116	2.65801	Inf	3	0
217558	15425	chr13	chr1	110980000	154740000	2181950000	154740000	ENSG00000088448	ENSG00000143603	ENSG00000088448_ENSG00000143603	ENSG00000143603_ENSG00000088448	ANKRD10	KCNN3	110896804	154783868	83196	-43868	3.13513	Inf	4	0
217558	19576	chr13	chr1	110980000	196250000	2181950000	196250000	ENSG00000088448	ENSG00000162687	ENSG00000088448_ENSG00000162687	ENSG00000162687_ENSG00000088448	ANKRD10	KCNT2	110896804	196417502	83196	-167502	3.13513	Inf	4	0
217558	24877	chr13	chr2	110980000	1300000	2181950000	249750000	ENSG00000088448	ENSG00000172554	ENSG00000088448_ENSG00000172554	ENSG00000172554_ENSG00000088448	ANKRD10	SNTG2	110896804	1159231	83196	140769	3.13513	Inf	4	0
217558	29341	chr13	chr2	110980000	45940000	2181950000	294390000	ENSG00000088448	ENSG00000171132	ENSG00000088448_ENSG00000171132	ENSG00000171132_ENSG00000088448	ANKRD10	PRKCE	110896804	45919668	83196	20332	3.13513	Inf	4	0
217558	72946	chr13	chr4	110980000	43490000	2181950000	731420000	ENSG00000088448	ENSG00000215203	ENSG00000088448_ENSG00000215203	ENSG00000215203_ENSG00000088448	ANKRD10	GRXCR1	110896804	42961962	83196	528038	3.13513	Inf	4	0
217558	216741	chr13	chr13	110980000	102810000	2181950000	2173780000	ENSG00000088448	ENSG00000134897	ENSG00000088448_ENSG00000134897	ENSG00000134897_ENSG00000088448	ANKRD10	BIVM	110896804	102820326	83196	-10326	3.13513	Inf	4	0
217846	1536	chr13	chr1	113860000	15850000	2184830000	15850000	ENSG00000183087	ENSG00000233954	ENSG00000183087_ENSG00000233954	ENSG00000233954_ENSG00000183087	GAS6	UQCRHL	113842312	15808258	17688	41742	3.47756	Inf	5	4
217846	2744	chr13	chr1	113860000	27930000	2184830000	27930000	ENSG00000183087	ENSG00000130768	ENSG00000183087_ENSG00000130768	ENSG00000130768_ENSG00000183087	GAS6	SMPDL3B	113842312	27947078	17688	-17078	3.47756	Inf	5	4
217846	6123	chr13	chr1	113860000	61720000	2184830000	61720000	ENSG00000183087	ENSG00000162604	ENSG00000183087_ENSG00000162604	ENSG00000162604_ENSG00000183087	GAS6	TM2D1	113842312	61703234	17688	16766	3.47756	Inf	5	4
217846	34805	chr13	chr2	113860000	100580000	2184830000	349030000	ENSG00000183087	ENSG00000115539	ENSG00000183087_ENSG00000115539	ENSG00000115539_ENSG00000183087	GAS6	PDCL3	113842312	100569866	17688	10134	3.47756	Inf	5	4
217846	87571	chr13	chr5	113860000	520000	2184830000	878160000	ENSG00000183087	ENSG00000066230	ENSG00000183087_ENSG00000066230	ENSG00000066230_ENSG00000183087	GAS6	SLC9A3	113842312	497395	17688	22605	3.47756	Inf	5	4
217846	87593	chr13	chr5	113860000	740000	2184830000	878380000	ENSG00000183087	ENSG00000286094	ENSG00000183087_ENSG00000286094	ENSG00000286094_ENSG00000183087	GAS6	AC026740.3	113842312	741864	17688	-1864	3.47756	Inf	5	4
217846	104583	chr13	chr5	113860000	170640000	2184830000	1048280000	ENSG00000183087	ENSG00000182132	ENSG00000183087_ENSG00000182132	ENSG00000182132_ENSG00000183087	GAS6	KCNIP1	113842312	170545060	17688	94940	3.47756	Inf	5	4
217846	135802	chr13	chr7	113860000	132480000	2184830000	1361450000	ENSG00000183087	ENSG00000221866	ENSG00000183087_ENSG00000221866	ENSG00000221866_ENSG00000183087	GAS6	PLXNA4	113842312	132386010	17688	93990	3.47756	Inf	5	4
217846	178205	chr13	chr10	113860000	116620000	2184830000	1786950000	ENSG00000183087	ENSG00000187021	ENSG00000183087_ENSG00000187021	ENSG00000187021_ENSG00000183087	GAS6	PNLIPRP1	113842312	116599780	17688	20220	3.47756	Inf	5	4
217846	179872	chr13	chr10	113860000	133290000	2184830000	1803620000	ENSG00000183087	ENSG00000130640	ENSG00000183087_ENSG00000130640	ENSG00000130640_ENSG00000183087	GAS6	TUBGCP2	113842312	133295484	17688	-5484	3.47756	Inf	5	4
220786	8941	chr14	chr1	29890000	89900000	2214720000	89900000	ENSG00000184304	ENSG00000171492	ENSG00000184304_ENSG00000171492	ENSG00000171492_ENSG00000184304	PRKD1	LRRC8D	29884188	89878812	5812	21188	3.6994	Inf	6	0
220786	9040	chr14	chr1	29890000	90890000	2214720000	90890000	ENSG00000184304	ENSG00000122482	ENSG00000184304_ENSG00000122482	ENSG00000122482_ENSG00000184304	PRKD1	ZNF644	29884188	90968785	5812	-78785	3.6994	Inf	6	0
220786	31454	chr14	chr2	29890000	67070000	2214720000	315520000	ENSG00000184304	ENSG00000143971	ENSG00000184304_ENSG00000143971	ENSG00000143971_ENSG00000184304	PRKD1	ETAA1	29884188	67404704	5812	-334704	3.6994	Inf	6	0
221893	28201	chr14	chr2	40960000	34540000	2225790000	282990000	ENSG00000165379	ENSG00000119812	ENSG00000165379_ENSG00000119812	ENSG00000119812_ENSG00000165379	LRFN5	FAM98A	41756060	33591521	-796060	948479	2.02119	Inf	2	5
221893	30442	chr14	chr2	40960000	56950000	2225790000	305400000	ENSG00000165379	ENSG00000055813	ENSG00000165379_ENSG00000055813	ENSG00000055813_ENSG00000165379	LRFN5	CCDC85A	41756060	56285081	-796060	664919	2.02119	Inf	2	5
221893	48694	chr14	chr2	40960000	239470000	2225790000	487920000	ENSG00000165379	ENSG00000068024	ENSG00000165379_ENSG00000068024	ENSG00000068024_ENSG00000165379	LRFN5	HDAC4	41756060	239224911	-796060	245089	2.02119	Inf	2	5
221893	48711	chr14	chr2	40960000	239640000	2225790000	488090000	ENSG00000165379	ENSG00000130414	ENSG00000165379_ENSG00000130414	ENSG00000130414_ENSG00000165379	LRFN5	NDUFA10	41756060	239958898	-796060	-318898	2.02119	Inf	2	5
221893	99357	chr14	chr5	40960000	118380000	2225790000	996020000	ENSG00000165379	ENSG00000169570	ENSG00000165379_ENSG00000169570	ENSG00000169570_ENSG00000165379	LRFN5	DTWD2	41756060	118912310	-796060	-532310	2.02119	Inf	2	5
221893	135101	chr14	chr7	40960000	125470000	2225790000	1354440000	ENSG00000165379	ENSG00000128513	ENSG00000165379_ENSG00000128513	ENSG00000128513_ENSG00000165379	LRFN5	POT1	41756060	124876184	-796060	593816	2.02119	Inf	2	5
221893	152347	chr14	chr8	40960000	139580000	2225790000	1527390000	ENSG00000165379	ENSG00000169427	ENSG00000165379_ENSG00000169427	ENSG00000169427_ENSG00000165379	LRFN5	KCNK9	41756060	139652474	-796060	-72474	2.02119	Inf	2	5
221893	153385	chr14	chr9	40960000	5820000	2225790000	1538260000	ENSG00000165379	ENSG00000099219	ENSG00000165379_ENSG00000099219	ENSG00000099219_ENSG00000165379	LRFN5	ERMP1	41756060	5799096	-796060	20904	2.02119	Inf	2	5
221893	153951	chr14	chr9	40960000	11480000	2225790000	1543920000	ENSG00000165379	ENSG00000107165	ENSG00000165379_ENSG00000107165	ENSG00000107165_ENSG00000165379	LRFN5	TYRP1	41756060	12697864	-796060	-1217864	2.02119	Inf	2	5
221893	197319	chr14	chr12	40960000	40870000	2225790000	1979070000	ENSG00000165379	ENSG00000018236	ENSG00000165379_ENSG00000018236	ENSG00000018236_ENSG00000165379	LRFN5	CNTN1	41756060	40882427	-796060	-12427	2.02119	Inf	2	5
221893	216450	chr14	chr13	40960000	99900000	2225790000	2170870000	ENSG00000165379	ENSG00000139800	ENSG00000165379_ENSG00000139800	ENSG00000139800_ENSG00000165379	LRFN5	ZIC5	41756060	99967436	-796060	-67436	2.02119	Inf	2	5
222525	4647	chr14	chr1	47280000	46960000	2232110000	46960000	ENSG00000139915	ENSG00000187048	ENSG00000139915_ENSG00000187048	ENSG00000187048_ENSG00000139915	MDGA2	CYP4A11	47257848	46935330	22152	24670	2.65801	Inf	3	1
222525	16334	chr14	chr1	47280000	163830000	2232110000	163830000	ENSG00000139915	ENSG00000143228	ENSG00000139915_ENSG00000143228	ENSG00000143228_ENSG00000139915	MDGA2	NUF2	47257848	163311170	22152	518830	2.65801	Inf	3	1
222525	16721	chr14	chr1	47280000	167700000	2232110000	167700000	ENSG00000139915	ENSG00000198771	ENSG00000139915_ENSG00000198771	ENSG00000198771_ENSG00000139915	MDGA2	RCSD1	47257848	167669394	22152	30606	2.65801	Inf	3	1
222525	17056	chr14	chr1	47280000	171050000	2232110000	171050000	ENSG00000139915	ENSG00000117501	ENSG00000139915_ENSG00000117501	ENSG00000117501_ENSG00000139915	MDGA2	MROH9	47257848	171000118	22152	49882	2.65801	Inf	3	1
222525	17058	chr14	chr1	47280000	171070000	2232110000	171070000	ENSG00000139915	ENSG00000007933	ENSG00000139915_ENSG00000007933	ENSG00000007933_ENSG00000139915	MDGA2	FMO3	47257848	171104360	22152	-34360	2.65801	Inf	3	1
222525	21854	chr14	chr1	47280000	219030000	2232110000	219030000	ENSG00000139915	ENSG00000143353	ENSG00000139915_ENSG00000143353	ENSG00000143353_ENSG00000139915	MDGA2	LYPLAL1	47257848	219193367	22152	-163367	2.65801	Inf	3	1
222525	25228	chr14	chr2	47280000	4810000	2232110000	253260000	ENSG00000139915	ENSG00000176887	ENSG00000139915_ENSG00000176887	ENSG00000176887_ENSG00000139915	MDGA2	SOX11	47257848	5696884	22152	-886884	2.65801	Inf	3	1
222525	50034	chr14	chr3	47280000	11670000	2232110000	501810000	ENSG00000139915	ENSG00000144560	ENSG00000139915_ENSG00000144560	ENSG00000144560_ENSG00000139915	MDGA2	VGLL4	47257848	11663710	22152	6290	2.65801	Inf	3	1
222525	50058	chr14	chr3	47280000	11910000	2232110000	502050000	ENSG00000139915	ENSG00000144559	ENSG00000139915_ENSG00000144559	ENSG00000144559_ENSG00000139915	MDGA2	TAMM41	47257848	11818680	22152	91320	2.65801	Inf	3	1
222525	51748	chr14	chr3	47280000	28810000	2232110000	518950000	ENSG00000139915	ENSG00000283563	ENSG00000139915_ENSG00000283563	ENSG00000283563_ENSG00000139915	MDGA2	AC098650.1	47257848	29058358	22152	-248358	2.65801	Inf	3	1
222525	52175	chr14	chr3	47280000	33080000	2232110000	523220000	ENSG00000139915	ENSG00000188167	ENSG00000139915_ENSG00000188167	ENSG00000188167_ENSG00000139915	MDGA2	TMPPE	47257848	33093784	22152	-13784	2.65801	Inf	3	1
222525	63247	chr14	chr3	47280000	143800000	2232110000	633940000	ENSG00000139915	ENSG00000181744	ENSG00000139915_ENSG00000181744	ENSG00000181744_ENSG00000139915	MDGA2	DIPK2A	47257848	144010258	22152	-210258	2.65801	Inf	3	1
222525	68051	chr14	chr3	47280000	191840000	2232110000	681980000	ENSG00000139915	ENSG00000253548	ENSG00000139915_ENSG00000253548	ENSG00000253548_ENSG00000139915	MDGA2	PYDC2	47257848	191461310	22152	378690	2.65801	Inf	3	1
222525	71844	chr14	chr4	47280000	32470000	2232110000	720400000	ENSG00000139915	ENSG00000169851	ENSG00000139915_ENSG00000169851	ENSG00000169851_ENSG00000139915	MDGA2	PCDH7	47257848	30933610	22152	1536390	2.65801	Inf	3	1
222525	86574	chr14	chr4	47280000	179770000	2232110000	867700000	ENSG00000139915	ENSG00000038002	ENSG00000139915_ENSG00000038002	ENSG00000038002_ENSG00000139915	MDGA2	AGA	47257848	177436606	22152	2333394	2.65801	Inf	3	1
222525	89134	chr14	chr5	47280000	16150000	2232110000	893790000	ENSG00000139915	ENSG00000183654	ENSG00000139915_ENSG00000183654	ENSG00000183654_ENSG00000139915	MDGA2	2021-03-11	47257848	16123950	22152	26050	2.65801	Inf	3	1
222525	89828	chr14	chr5	47280000	23090000	2232110000	900730000	ENSG00000139915	ENSG00000164256	ENSG00000139915_ENSG00000164256	ENSG00000164256_ENSG00000139915	MDGA2	PRDM9	47257848	23486092	22152	-396092	2.65801	Inf	3	1
222525	101840	chr14	chr5	47280000	143210000	2232110000	1020850000	ENSG00000139915	ENSG00000113580	ENSG00000139915_ENSG00000113580	ENSG00000113580_ENSG00000139915	MDGA2	NR3C1	47257848	143356722	22152	-146722	2.65801	Inf	3	1
222525	106738	chr14	chr6	47280000	11650000	2232110000	1070320000	ENSG00000139915	ENSG00000205269	ENSG00000139915_ENSG00000205269	ENSG00000205269_ENSG00000139915	MDGA2	TMEM170B	47257848	11560636	22152	89364	2.65801	Inf	3	1
222525	106747	chr14	chr6	47280000	11740000	2232110000	1070410000	ENSG00000139915	ENSG00000111863	ENSG00000139915_ENSG00000111863	ENSG00000111863_ENSG00000139915	MDGA2	ADTRP	47257848	11759550	22152	-19550	2.65801	Inf	3	1
222525	120362	chr14	chr6	47280000	147890000	2232110000	1206560000	ENSG00000139915	ENSG00000203727	ENSG00000139915_ENSG00000203727	ENSG00000203727_ENSG00000139915	MDGA2	SAMD5	47257848	147623118	22152	266882	2.65801	Inf	3	1
222525	123939	chr14	chr7	47280000	13850000	2232110000	1242820000	ENSG00000139915	ENSG00000006468	ENSG00000139915_ENSG00000006468	ENSG00000006468_ENSG00000139915	MDGA2	ETV1	47257848	13941327	22152	-91327	2.65801	Inf	3	1
222525	132908	chr14	chr7	47280000	103540000	2232110000	1332510000	ENSG00000139915	ENSG00000170615	ENSG00000139915_ENSG00000170615	ENSG00000170615_ENSG00000139915	MDGA2	SLC26A5	47257848	103399454	22152	140546	2.65801	Inf	3	1
222525	133680	chr14	chr7	47280000	111260000	2232110000	1340230000	ENSG00000139915	ENSG00000184903	ENSG00000139915_ENSG00000184903	ENSG00000184903_ENSG00000139915	MDGA2	IMMP2L	47257848	111112784	22152	147216	2.65801	Inf	3	1
222525	134494	chr14	chr7	47280000	119400000	2232110000	1348370000	ENSG00000139915	ENSG00000106013	ENSG00000139915_ENSG00000106013	ENSG00000106013_ENSG00000139915	MDGA2	ANKRD7	47257848	118355420	22152	1044580	2.65801	Inf	3	1
222525	134851	chr14	chr7	47280000	122970000	2232110000	1351940000	ENSG00000139915	ENSG00000128519	ENSG00000139915_ENSG00000128519	ENSG00000128519_ENSG00000139915	MDGA2	TAS2R16	47257848	122995202	22152	-25202	2.65801	Inf	3	1
222525	137147	chr14	chr7	47280000	145930000	2232110000	1374900000	ENSG00000139915	ENSG00000196511	ENSG00000139915_ENSG00000196511	ENSG00000196511_ENSG00000139915	MDGA2	TPK1	47257848	144644168	22152	1285832	2.65801	Inf	3	1
222525	139179	chr14	chr8	47280000	7900000	2232110000	1395710000	ENSG00000139915	ENSG00000171711	ENSG00000139915_ENSG00000171711	ENSG00000171711_ENSG00000139915	MDGA2	DEFB4A	47257848	7895670	22152	4330	2.65801	Inf	3	1
222525	147985	chr14	chr8	47280000	95960000	2232110000	1483770000	ENSG00000139915	ENSG00000156466	ENSG00000139915_ENSG00000156466	ENSG00000156466_ENSG00000139915	MDGA2	GDF6	47257848	96151570	22152	-191570	2.65801	Inf	3	1
222525	152113	chr14	chr8	47280000	137240000	2232110000	1525050000	ENSG00000139915	ENSG00000147724	ENSG00000139915_ENSG00000147724	ENSG00000147724_ENSG00000139915	MDGA2	FAM135B	47257848	138313642	22152	-1073642	2.65801	Inf	3	1
222525	160196	chr14	chr9	47280000	73930000	2232110000	1606370000	ENSG00000139915	ENSG00000198963	ENSG00000139915_ENSG00000198963	ENSG00000198963_ENSG00000139915	MDGA2	RORB	47257848	74595256	22152	-665256	2.65801	Inf	3	1
222525	160498	chr14	chr9	47280000	76950000	2232110000	1609390000	ENSG00000139915	ENSG00000204612	ENSG00000139915_ENSG00000204612	ENSG00000204612_ENSG00000139915	MDGA2	FOXB2	47257848	77020304	22152	-70304	2.65801	Inf	3	1
222525	161805	chr14	chr9	47280000	90020000	2232110000	1622460000	ENSG00000139915	ENSG00000130222	ENSG00000139915_ENSG00000130222	ENSG00000130222_ENSG00000139915	MDGA2	GADD45G	47257848	89605784	22152	414216	2.65801	Inf	3	1
222525	162022	chr14	chr9	47280000	92190000	2232110000	1624630000	ENSG00000139915	ENSG00000196305	ENSG00000139915_ENSG00000196305	ENSG00000196305_ENSG00000139915	MDGA2	IARS	47257848	92251982	22152	-61982	2.65801	Inf	3	1
222525	164860	chr14	chr9	47280000	120570000	2232110000	1653010000	ENSG00000139915	ENSG00000136861	ENSG00000139915_ENSG00000136861	ENSG00000136861_ENSG00000139915	MDGA2	CDK5RAP2	47257848	120484520	22152	85480	2.65801	Inf	3	1
222525	173040	chr14	chr10	47280000	64970000	2232110000	1735300000	ENSG00000139915	ENSG00000165476	ENSG00000139915_ENSG00000165476	ENSG00000165476_ENSG00000139915	MDGA2	REEP3	47257848	63573264	22152	1396736	2.65801	Inf	3	1
222525	173126	chr14	chr10	47280000	65830000	2232110000	1736160000	ENSG00000139915	ENSG00000183230	ENSG00000139915_ENSG00000183230	ENSG00000183230_ENSG00000139915	MDGA2	CTNNA3	47257848	66804359	22152	-974359	2.65801	Inf	3	1
222525	177483	chr14	chr10	47280000	109400000	2232110000	1779730000	ENSG00000139915	ENSG00000108039	ENSG00000139915_ENSG00000108039	ENSG00000108039_ENSG00000139915	MDGA2	XPNPEP1	47257848	109894160	22152	-494160	2.65801	Inf	3	1
222525	177643	chr14	chr10	47280000	111000000	2232110000	1781330000	ENSG00000139915	ENSG00000108061	ENSG00000139915_ENSG00000108061	ENSG00000108061_ENSG00000139915	MDGA2	SHOC2	47257848	110966607	22152	33393	2.65801	Inf	3	1
222525	181225	chr14	chr11	47280000	14020000	2232110000	1817640000	ENSG00000139915	ENSG00000262655	ENSG00000139915_ENSG00000262655	ENSG00000262655_ENSG00000139915	MDGA2	SPON1	47257848	14115428	22152	-95428	2.65801	Inf	3	1
222525	186701	chr14	chr11	47280000	68780000	2232110000	1872400000	ENSG00000139915	ENSG00000110090	ENSG00000139915_ENSG00000110090	ENSG00000110090_ENSG00000139915	MDGA2	CPT1A	47257848	68799515	22152	-19515	2.65801	Inf	3	1
222525	189229	chr14	chr11	47280000	94060000	2232110000	1897680000	ENSG00000139915	ENSG00000181333	ENSG00000139915_ENSG00000181333	ENSG00000181333_ENSG00000139915	MDGA2	HEPHL1	47257848	94067556	22152	-7556	2.65801	Inf	3	1
222525	189642	chr14	chr11	47280000	98190000	2232110000	1901810000	ENSG00000139915	ENSG00000149972	ENSG00000139915_ENSG00000149972	ENSG00000149972_ENSG00000139915	MDGA2	CNTN5	47257848	99689917	22152	-1499917	2.65801	Inf	3	1
222525	202449	chr14	chr12	47280000	92170000	2232110000	2030370000	ENSG00000139915	ENSG00000133639	ENSG00000139915_ENSG00000133639	ENSG00000133639_ENSG00000139915	MDGA2	BTG1	47257848	92143062	22152	26938	2.65801	Inf	3	1
222525	206033	chr14	chr12	47280000	128010000	2232110000	2066210000	ENSG00000139915	ENSG00000181234	ENSG00000139915_ENSG00000181234	ENSG00000181234_ENSG00000139915	MDGA2	TMEM132C	47257848	128487659	22152	-477659	2.65801	Inf	3	1
224198	4647	chr14	chr1	64010000	46960000	2248840000	46960000	ENSG00000054654	ENSG00000187048	ENSG00000054654_ENSG00000187048	ENSG00000187048_ENSG00000054654	SYNE2	CYP4A11	64039708	46935330	-29708	24670	2.65801	Inf	3	1
224198	16334	chr14	chr1	64010000	163830000	2248840000	163830000	ENSG00000054654	ENSG00000143228	ENSG00000054654_ENSG00000143228	ENSG00000143228_ENSG00000054654	SYNE2	NUF2	64039708	163311170	-29708	518830	2.65801	Inf	3	1
224198	16721	chr14	chr1	64010000	167700000	2248840000	167700000	ENSG00000054654	ENSG00000198771	ENSG00000054654_ENSG00000198771	ENSG00000198771_ENSG00000054654	SYNE2	RCSD1	64039708	167669394	-29708	30606	2.65801	Inf	3	1
224198	17056	chr14	chr1	64010000	171050000	2248840000	171050000	ENSG00000054654	ENSG00000117501	ENSG00000054654_ENSG00000117501	ENSG00000117501_ENSG00000054654	SYNE2	MROH9	64039708	171000118	-29708	49882	2.65801	Inf	3	1
224198	17058	chr14	chr1	64010000	171070000	2248840000	171070000	ENSG00000054654	ENSG00000007933	ENSG00000054654_ENSG00000007933	ENSG00000007933_ENSG00000054654	SYNE2	FMO3	64039708	171104360	-29708	-34360	2.65801	Inf	3	1
224198	21854	chr14	chr1	64010000	219030000	2248840000	219030000	ENSG00000054654	ENSG00000143353	ENSG00000054654_ENSG00000143353	ENSG00000143353_ENSG00000054654	SYNE2	LYPLAL1	64039708	219193367	-29708	-163367	2.65801	Inf	3	1
224198	25228	chr14	chr2	64010000	4810000	2248840000	253260000	ENSG00000054654	ENSG00000176887	ENSG00000054654_ENSG00000176887	ENSG00000176887_ENSG00000054654	SYNE2	SOX11	64039708	5696884	-29708	-886884	2.65801	Inf	3	1
224198	50034	chr14	chr3	64010000	11670000	2248840000	501810000	ENSG00000054654	ENSG00000144560	ENSG00000054654_ENSG00000144560	ENSG00000144560_ENSG00000054654	SYNE2	VGLL4	64039708	11663710	-29708	6290	2.65801	Inf	3	1
224198	50058	chr14	chr3	64010000	11910000	2248840000	502050000	ENSG00000054654	ENSG00000144559	ENSG00000054654_ENSG00000144559	ENSG00000144559_ENSG00000054654	SYNE2	TAMM41	64039708	11818680	-29708	91320	2.65801	Inf	3	1
224198	51748	chr14	chr3	64010000	28810000	2248840000	518950000	ENSG00000054654	ENSG00000283563	ENSG00000054654_ENSG00000283563	ENSG00000283563_ENSG00000054654	SYNE2	AC098650.1	64039708	29058358	-29708	-248358	2.65801	Inf	3	1
224198	52175	chr14	chr3	64010000	33080000	2248840000	523220000	ENSG00000054654	ENSG00000188167	ENSG00000054654_ENSG00000188167	ENSG00000188167_ENSG00000054654	SYNE2	TMPPE	64039708	33093784	-29708	-13784	2.65801	Inf	3	1
224198	63247	chr14	chr3	64010000	143800000	2248840000	633940000	ENSG00000054654	ENSG00000181744	ENSG00000054654_ENSG00000181744	ENSG00000181744_ENSG00000054654	SYNE2	DIPK2A	64039708	144010258	-29708	-210258	2.65801	Inf	3	1
224198	68051	chr14	chr3	64010000	191840000	2248840000	681980000	ENSG00000054654	ENSG00000253548	ENSG00000054654_ENSG00000253548	ENSG00000253548_ENSG00000054654	SYNE2	PYDC2	64039708	191461310	-29708	378690	2.65801	Inf	3	1
224198	71844	chr14	chr4	64010000	32470000	2248840000	720400000	ENSG00000054654	ENSG00000169851	ENSG00000054654_ENSG00000169851	ENSG00000169851_ENSG00000054654	SYNE2	PCDH7	64039708	30933610	-29708	1536390	2.65801	Inf	3	1
224198	86574	chr14	chr4	64010000	179770000	2248840000	867700000	ENSG00000054654	ENSG00000038002	ENSG00000054654_ENSG00000038002	ENSG00000038002_ENSG00000054654	SYNE2	AGA	64039708	177436606	-29708	2333394	2.65801	Inf	3	1
224198	89134	chr14	chr5	64010000	16150000	2248840000	893790000	ENSG00000054654	ENSG00000183654	ENSG00000054654_ENSG00000183654	ENSG00000183654_ENSG00000054654	SYNE2	2021-03-11	64039708	16123950	-29708	26050	2.65801	Inf	3	1
224198	89828	chr14	chr5	64010000	23090000	2248840000	900730000	ENSG00000054654	ENSG00000164256	ENSG00000054654_ENSG00000164256	ENSG00000164256_ENSG00000054654	SYNE2	PRDM9	64039708	23486092	-29708	-396092	2.65801	Inf	3	1
224198	101840	chr14	chr5	64010000	143210000	2248840000	1020850000	ENSG00000054654	ENSG00000113580	ENSG00000054654_ENSG00000113580	ENSG00000113580_ENSG00000054654	SYNE2	NR3C1	64039708	143356722	-29708	-146722	2.65801	Inf	3	1
224198	106738	chr14	chr6	64010000	11650000	2248840000	1070320000	ENSG00000054654	ENSG00000205269	ENSG00000054654_ENSG00000205269	ENSG00000205269_ENSG00000054654	SYNE2	TMEM170B	64039708	11560636	-29708	89364	2.65801	Inf	3	1
224198	106747	chr14	chr6	64010000	11740000	2248840000	1070410000	ENSG00000054654	ENSG00000111863	ENSG00000054654_ENSG00000111863	ENSG00000111863_ENSG00000054654	SYNE2	ADTRP	64039708	11759550	-29708	-19550	2.65801	Inf	3	1
224198	120362	chr14	chr6	64010000	147890000	2248840000	1206560000	ENSG00000054654	ENSG00000203727	ENSG00000054654_ENSG00000203727	ENSG00000203727_ENSG00000054654	SYNE2	SAMD5	64039708	147623118	-29708	266882	2.65801	Inf	3	1
224198	123939	chr14	chr7	64010000	13850000	2248840000	1242820000	ENSG00000054654	ENSG00000006468	ENSG00000054654_ENSG00000006468	ENSG00000006468_ENSG00000054654	SYNE2	ETV1	64039708	13941327	-29708	-91327	2.65801	Inf	3	1
224198	132908	chr14	chr7	64010000	103540000	2248840000	1332510000	ENSG00000054654	ENSG00000170615	ENSG00000054654_ENSG00000170615	ENSG00000170615_ENSG00000054654	SYNE2	SLC26A5	64039708	103399454	-29708	140546	2.65801	Inf	3	1
224198	133680	chr14	chr7	64010000	111260000	2248840000	1340230000	ENSG00000054654	ENSG00000184903	ENSG00000054654_ENSG00000184903	ENSG00000184903_ENSG00000054654	SYNE2	IMMP2L	64039708	111112784	-29708	147216	2.65801	Inf	3	1
224198	134494	chr14	chr7	64010000	119400000	2248840000	1348370000	ENSG00000054654	ENSG00000106013	ENSG00000054654_ENSG00000106013	ENSG00000106013_ENSG00000054654	SYNE2	ANKRD7	64039708	118355420	-29708	1044580	2.65801	Inf	3	1
224198	134851	chr14	chr7	64010000	122970000	2248840000	1351940000	ENSG00000054654	ENSG00000128519	ENSG00000054654_ENSG00000128519	ENSG00000128519_ENSG00000054654	SYNE2	TAS2R16	64039708	122995202	-29708	-25202	2.65801	Inf	3	1
224198	137147	chr14	chr7	64010000	145930000	2248840000	1374900000	ENSG00000054654	ENSG00000196511	ENSG00000054654_ENSG00000196511	ENSG00000196511_ENSG00000054654	SYNE2	TPK1	64039708	144644168	-29708	1285832	2.65801	Inf	3	1
224198	139179	chr14	chr8	64010000	7900000	2248840000	1395710000	ENSG00000054654	ENSG00000171711	ENSG00000054654_ENSG00000171711	ENSG00000171711_ENSG00000054654	SYNE2	DEFB4A	64039708	7895670	-29708	4330	2.65801	Inf	3	1
224198	147985	chr14	chr8	64010000	95960000	2248840000	1483770000	ENSG00000054654	ENSG00000156466	ENSG00000054654_ENSG00000156466	ENSG00000156466_ENSG00000054654	SYNE2	GDF6	64039708	96151570	-29708	-191570	2.65801	Inf	3	1
224198	152113	chr14	chr8	64010000	137240000	2248840000	1525050000	ENSG00000054654	ENSG00000147724	ENSG00000054654_ENSG00000147724	ENSG00000147724_ENSG00000054654	SYNE2	FAM135B	64039708	138313642	-29708	-1073642	2.65801	Inf	3	1
224198	160196	chr14	chr9	64010000	73930000	2248840000	1606370000	ENSG00000054654	ENSG00000198963	ENSG00000054654_ENSG00000198963	ENSG00000198963_ENSG00000054654	SYNE2	RORB	64039708	74595256	-29708	-665256	2.65801	Inf	3	1
224198	160498	chr14	chr9	64010000	76950000	2248840000	1609390000	ENSG00000054654	ENSG00000204612	ENSG00000054654_ENSG00000204612	ENSG00000204612_ENSG00000054654	SYNE2	FOXB2	64039708	77020304	-29708	-70304	2.65801	Inf	3	1
224198	161805	chr14	chr9	64010000	90020000	2248840000	1622460000	ENSG00000054654	ENSG00000130222	ENSG00000054654_ENSG00000130222	ENSG00000130222_ENSG00000054654	SYNE2	GADD45G	64039708	89605784	-29708	414216	2.65801	Inf	3	1
224198	162022	chr14	chr9	64010000	92190000	2248840000	1624630000	ENSG00000054654	ENSG00000196305	ENSG00000054654_ENSG00000196305	ENSG00000196305_ENSG00000054654	SYNE2	IARS	64039708	92251982	-29708	-61982	2.65801	Inf	3	1
224198	164860	chr14	chr9	64010000	120570000	2248840000	1653010000	ENSG00000054654	ENSG00000136861	ENSG00000054654_ENSG00000136861	ENSG00000136861_ENSG00000054654	SYNE2	CDK5RAP2	64039708	120484520	-29708	85480	2.65801	Inf	3	1
224198	173040	chr14	chr10	64010000	64970000	2248840000	1735300000	ENSG00000054654	ENSG00000165476	ENSG00000054654_ENSG00000165476	ENSG00000165476_ENSG00000054654	SYNE2	REEP3	64039708	63573264	-29708	1396736	2.65801	Inf	3	1
224198	173126	chr14	chr10	64010000	65830000	2248840000	1736160000	ENSG00000054654	ENSG00000183230	ENSG00000054654_ENSG00000183230	ENSG00000183230_ENSG00000054654	SYNE2	CTNNA3	64039708	66804359	-29708	-974359	2.65801	Inf	3	1
224198	177483	chr14	chr10	64010000	109400000	2248840000	1779730000	ENSG00000054654	ENSG00000108039	ENSG00000054654_ENSG00000108039	ENSG00000108039_ENSG00000054654	SYNE2	XPNPEP1	64039708	109894160	-29708	-494160	2.65801	Inf	3	1
224198	177643	chr14	chr10	64010000	111000000	2248840000	1781330000	ENSG00000054654	ENSG00000108061	ENSG00000054654_ENSG00000108061	ENSG00000108061_ENSG00000054654	SYNE2	SHOC2	64039708	110966607	-29708	33393	2.65801	Inf	3	1
224198	181225	chr14	chr11	64010000	14020000	2248840000	1817640000	ENSG00000054654	ENSG00000262655	ENSG00000054654_ENSG00000262655	ENSG00000262655_ENSG00000054654	SYNE2	SPON1	64039708	14115428	-29708	-95428	2.65801	Inf	3	1
224198	186701	chr14	chr11	64010000	68780000	2248840000	1872400000	ENSG00000054654	ENSG00000110090	ENSG00000054654_ENSG00000110090	ENSG00000110090_ENSG00000054654	SYNE2	CPT1A	64039708	68799515	-29708	-19515	2.65801	Inf	3	1
224198	189229	chr14	chr11	64010000	94060000	2248840000	1897680000	ENSG00000054654	ENSG00000181333	ENSG00000054654_ENSG00000181333	ENSG00000181333_ENSG00000054654	SYNE2	HEPHL1	64039708	94067556	-29708	-7556	2.65801	Inf	3	1
224198	189642	chr14	chr11	64010000	98190000	2248840000	1901810000	ENSG00000054654	ENSG00000149972	ENSG00000054654_ENSG00000149972	ENSG00000149972_ENSG00000054654	SYNE2	CNTN5	64039708	99689917	-29708	-1499917	2.65801	Inf	3	1
224198	202449	chr14	chr12	64010000	92170000	2248840000	2030370000	ENSG00000054654	ENSG00000133639	ENSG00000054654_ENSG00000133639	ENSG00000133639_ENSG00000054654	SYNE2	BTG1	64039708	92143062	-29708	26938	2.65801	Inf	3	1
224198	206033	chr14	chr12	64010000	128010000	2248840000	2066210000	ENSG00000054654	ENSG00000181234	ENSG00000054654_ENSG00000181234	ENSG00000181234_ENSG00000054654	SYNE2	TMEM132C	64039708	128487659	-29708	-477659	2.65801	Inf	3	1
224198	222525	chr14	chr14	64010000	47280000	2248840000	2232110000	ENSG00000054654	ENSG00000139915	ENSG00000054654_ENSG00000139915	ENSG00000139915_ENSG00000054654	SYNE2	MDGA2	64039708	47257848	-29708	22152	2.65801	Inf	3	1
224637	4647	chr14	chr1	68400000	46960000	2253230000	46960000	ENSG00000182185	ENSG00000187048	ENSG00000182185_ENSG00000187048	ENSG00000187048_ENSG00000182185	RAD51B	CYP4A11	68274998	46935330	125002	24670	2.65801	Inf	3	1
224637	16334	chr14	chr1	68400000	163830000	2253230000	163830000	ENSG00000182185	ENSG00000143228	ENSG00000182185_ENSG00000143228	ENSG00000143228_ENSG00000182185	RAD51B	NUF2	68274998	163311170	125002	518830	2.65801	Inf	3	1
224637	16721	chr14	chr1	68400000	167700000	2253230000	167700000	ENSG00000182185	ENSG00000198771	ENSG00000182185_ENSG00000198771	ENSG00000198771_ENSG00000182185	RAD51B	RCSD1	68274998	167669394	125002	30606	2.65801	Inf	3	1
224637	17056	chr14	chr1	68400000	171050000	2253230000	171050000	ENSG00000182185	ENSG00000117501	ENSG00000182185_ENSG00000117501	ENSG00000117501_ENSG00000182185	RAD51B	MROH9	68274998	171000118	125002	49882	2.65801	Inf	3	1
224637	17058	chr14	chr1	68400000	171070000	2253230000	171070000	ENSG00000182185	ENSG00000007933	ENSG00000182185_ENSG00000007933	ENSG00000007933_ENSG00000182185	RAD51B	FMO3	68274998	171104360	125002	-34360	2.65801	Inf	3	1
224637	21854	chr14	chr1	68400000	219030000	2253230000	219030000	ENSG00000182185	ENSG00000143353	ENSG00000182185_ENSG00000143353	ENSG00000143353_ENSG00000182185	RAD51B	LYPLAL1	68274998	219193367	125002	-163367	2.65801	Inf	3	1
224637	25228	chr14	chr2	68400000	4810000	2253230000	253260000	ENSG00000182185	ENSG00000176887	ENSG00000182185_ENSG00000176887	ENSG00000176887_ENSG00000182185	RAD51B	SOX11	68274998	5696884	125002	-886884	2.65801	Inf	3	1
224637	50034	chr14	chr3	68400000	11670000	2253230000	501810000	ENSG00000182185	ENSG00000144560	ENSG00000182185_ENSG00000144560	ENSG00000144560_ENSG00000182185	RAD51B	VGLL4	68274998	11663710	125002	6290	2.65801	Inf	3	1
224637	50058	chr14	chr3	68400000	11910000	2253230000	502050000	ENSG00000182185	ENSG00000144559	ENSG00000182185_ENSG00000144559	ENSG00000144559_ENSG00000182185	RAD51B	TAMM41	68274998	11818680	125002	91320	2.65801	Inf	3	1
224637	51748	chr14	chr3	68400000	28810000	2253230000	518950000	ENSG00000182185	ENSG00000283563	ENSG00000182185_ENSG00000283563	ENSG00000283563_ENSG00000182185	RAD51B	AC098650.1	68274998	29058358	125002	-248358	2.65801	Inf	3	1
224637	52175	chr14	chr3	68400000	33080000	2253230000	523220000	ENSG00000182185	ENSG00000188167	ENSG00000182185_ENSG00000188167	ENSG00000188167_ENSG00000182185	RAD51B	TMPPE	68274998	33093784	125002	-13784	2.65801	Inf	3	1
224637	63247	chr14	chr3	68400000	143800000	2253230000	633940000	ENSG00000182185	ENSG00000181744	ENSG00000182185_ENSG00000181744	ENSG00000181744_ENSG00000182185	RAD51B	DIPK2A	68274998	144010258	125002	-210258	2.65801	Inf	3	1
224637	68051	chr14	chr3	68400000	191840000	2253230000	681980000	ENSG00000182185	ENSG00000253548	ENSG00000182185_ENSG00000253548	ENSG00000253548_ENSG00000182185	RAD51B	PYDC2	68274998	191461310	125002	378690	2.65801	Inf	3	1
224637	71844	chr14	chr4	68400000	32470000	2253230000	720400000	ENSG00000182185	ENSG00000169851	ENSG00000182185_ENSG00000169851	ENSG00000169851_ENSG00000182185	RAD51B	PCDH7	68274998	30933610	125002	1536390	2.65801	Inf	3	1
224637	86574	chr14	chr4	68400000	179770000	2253230000	867700000	ENSG00000182185	ENSG00000038002	ENSG00000182185_ENSG00000038002	ENSG00000038002_ENSG00000182185	RAD51B	AGA	68274998	177436606	125002	2333394	2.65801	Inf	3	1
224637	89134	chr14	chr5	68400000	16150000	2253230000	893790000	ENSG00000182185	ENSG00000183654	ENSG00000182185_ENSG00000183654	ENSG00000183654_ENSG00000182185	RAD51B	2021-03-11	68274998	16123950	125002	26050	2.65801	Inf	3	1
224637	89828	chr14	chr5	68400000	23090000	2253230000	900730000	ENSG00000182185	ENSG00000164256	ENSG00000182185_ENSG00000164256	ENSG00000164256_ENSG00000182185	RAD51B	PRDM9	68274998	23486092	125002	-396092	2.65801	Inf	3	1
224637	101840	chr14	chr5	68400000	143210000	2253230000	1020850000	ENSG00000182185	ENSG00000113580	ENSG00000182185_ENSG00000113580	ENSG00000113580_ENSG00000182185	RAD51B	NR3C1	68274998	143356722	125002	-146722	2.65801	Inf	3	1
224637	106738	chr14	chr6	68400000	11650000	2253230000	1070320000	ENSG00000182185	ENSG00000205269	ENSG00000182185_ENSG00000205269	ENSG00000205269_ENSG00000182185	RAD51B	TMEM170B	68274998	11560636	125002	89364	2.65801	Inf	3	1
224637	106747	chr14	chr6	68400000	11740000	2253230000	1070410000	ENSG00000182185	ENSG00000111863	ENSG00000182185_ENSG00000111863	ENSG00000111863_ENSG00000182185	RAD51B	ADTRP	68274998	11759550	125002	-19550	2.65801	Inf	3	1
224637	120362	chr14	chr6	68400000	147890000	2253230000	1206560000	ENSG00000182185	ENSG00000203727	ENSG00000182185_ENSG00000203727	ENSG00000203727_ENSG00000182185	RAD51B	SAMD5	68274998	147623118	125002	266882	2.65801	Inf	3	1
224637	123939	chr14	chr7	68400000	13850000	2253230000	1242820000	ENSG00000182185	ENSG00000006468	ENSG00000182185_ENSG00000006468	ENSG00000006468_ENSG00000182185	RAD51B	ETV1	68274998	13941327	125002	-91327	2.65801	Inf	3	1
224637	132908	chr14	chr7	68400000	103540000	2253230000	1332510000	ENSG00000182185	ENSG00000170615	ENSG00000182185_ENSG00000170615	ENSG00000170615_ENSG00000182185	RAD51B	SLC26A5	68274998	103399454	125002	140546	2.65801	Inf	3	1
224637	133680	chr14	chr7	68400000	111260000	2253230000	1340230000	ENSG00000182185	ENSG00000184903	ENSG00000182185_ENSG00000184903	ENSG00000184903_ENSG00000182185	RAD51B	IMMP2L	68274998	111112784	125002	147216	2.65801	Inf	3	1
224637	134494	chr14	chr7	68400000	119400000	2253230000	1348370000	ENSG00000182185	ENSG00000106013	ENSG00000182185_ENSG00000106013	ENSG00000106013_ENSG00000182185	RAD51B	ANKRD7	68274998	118355420	125002	1044580	2.65801	Inf	3	1
224637	134851	chr14	chr7	68400000	122970000	2253230000	1351940000	ENSG00000182185	ENSG00000128519	ENSG00000182185_ENSG00000128519	ENSG00000128519_ENSG00000182185	RAD51B	TAS2R16	68274998	122995202	125002	-25202	2.65801	Inf	3	1
224637	137147	chr14	chr7	68400000	145930000	2253230000	1374900000	ENSG00000182185	ENSG00000196511	ENSG00000182185_ENSG00000196511	ENSG00000196511_ENSG00000182185	RAD51B	TPK1	68274998	144644168	125002	1285832	2.65801	Inf	3	1
224637	139179	chr14	chr8	68400000	7900000	2253230000	1395710000	ENSG00000182185	ENSG00000171711	ENSG00000182185_ENSG00000171711	ENSG00000171711_ENSG00000182185	RAD51B	DEFB4A	68274998	7895670	125002	4330	2.65801	Inf	3	1
224637	147985	chr14	chr8	68400000	95960000	2253230000	1483770000	ENSG00000182185	ENSG00000156466	ENSG00000182185_ENSG00000156466	ENSG00000156466_ENSG00000182185	RAD51B	GDF6	68274998	96151570	125002	-191570	2.65801	Inf	3	1
224637	152113	chr14	chr8	68400000	137240000	2253230000	1525050000	ENSG00000182185	ENSG00000147724	ENSG00000182185_ENSG00000147724	ENSG00000147724_ENSG00000182185	RAD51B	FAM135B	68274998	138313642	125002	-1073642	2.65801	Inf	3	1
224637	160196	chr14	chr9	68400000	73930000	2253230000	1606370000	ENSG00000182185	ENSG00000198963	ENSG00000182185_ENSG00000198963	ENSG00000198963_ENSG00000182185	RAD51B	RORB	68274998	74595256	125002	-665256	2.65801	Inf	3	1
224637	160498	chr14	chr9	68400000	76950000	2253230000	1609390000	ENSG00000182185	ENSG00000204612	ENSG00000182185_ENSG00000204612	ENSG00000204612_ENSG00000182185	RAD51B	FOXB2	68274998	77020304	125002	-70304	2.65801	Inf	3	1
224637	161805	chr14	chr9	68400000	90020000	2253230000	1622460000	ENSG00000182185	ENSG00000130222	ENSG00000182185_ENSG00000130222	ENSG00000130222_ENSG00000182185	RAD51B	GADD45G	68274998	89605784	125002	414216	2.65801	Inf	3	1
224637	162022	chr14	chr9	68400000	92190000	2253230000	1624630000	ENSG00000182185	ENSG00000196305	ENSG00000182185_ENSG00000196305	ENSG00000196305_ENSG00000182185	RAD51B	IARS	68274998	92251982	125002	-61982	2.65801	Inf	3	1
224637	164860	chr14	chr9	68400000	120570000	2253230000	1653010000	ENSG00000182185	ENSG00000136861	ENSG00000182185_ENSG00000136861	ENSG00000136861_ENSG00000182185	RAD51B	CDK5RAP2	68274998	120484520	125002	85480	2.65801	Inf	3	1
224637	173040	chr14	chr10	68400000	64970000	2253230000	1735300000	ENSG00000182185	ENSG00000165476	ENSG00000182185_ENSG00000165476	ENSG00000165476_ENSG00000182185	RAD51B	REEP3	68274998	63573264	125002	1396736	2.65801	Inf	3	1
224637	173126	chr14	chr10	68400000	65830000	2253230000	1736160000	ENSG00000182185	ENSG00000183230	ENSG00000182185_ENSG00000183230	ENSG00000183230_ENSG00000182185	RAD51B	CTNNA3	68274998	66804359	125002	-974359	2.65801	Inf	3	1
224637	177483	chr14	chr10	68400000	109400000	2253230000	1779730000	ENSG00000182185	ENSG00000108039	ENSG00000182185_ENSG00000108039	ENSG00000108039_ENSG00000182185	RAD51B	XPNPEP1	68274998	109894160	125002	-494160	2.65801	Inf	3	1
224637	177643	chr14	chr10	68400000	111000000	2253230000	1781330000	ENSG00000182185	ENSG00000108061	ENSG00000182185_ENSG00000108061	ENSG00000108061_ENSG00000182185	RAD51B	SHOC2	68274998	110966607	125002	33393	2.65801	Inf	3	1
224637	181225	chr14	chr11	68400000	14020000	2253230000	1817640000	ENSG00000182185	ENSG00000262655	ENSG00000182185_ENSG00000262655	ENSG00000262655_ENSG00000182185	RAD51B	SPON1	68274998	14115428	125002	-95428	2.65801	Inf	3	1
224637	186701	chr14	chr11	68400000	68780000	2253230000	1872400000	ENSG00000182185	ENSG00000110090	ENSG00000182185_ENSG00000110090	ENSG00000110090_ENSG00000182185	RAD51B	CPT1A	68274998	68799515	125002	-19515	2.65801	Inf	3	1
224637	189229	chr14	chr11	68400000	94060000	2253230000	1897680000	ENSG00000182185	ENSG00000181333	ENSG00000182185_ENSG00000181333	ENSG00000181333_ENSG00000182185	RAD51B	HEPHL1	68274998	94067556	125002	-7556	2.65801	Inf	3	1
224637	189642	chr14	chr11	68400000	98190000	2253230000	1901810000	ENSG00000182185	ENSG00000149972	ENSG00000182185_ENSG00000149972	ENSG00000149972_ENSG00000182185	RAD51B	CNTN5	68274998	99689917	125002	-1499917	2.65801	Inf	3	1
224637	202449	chr14	chr12	68400000	92170000	2253230000	2030370000	ENSG00000182185	ENSG00000133639	ENSG00000182185_ENSG00000133639	ENSG00000133639_ENSG00000182185	RAD51B	BTG1	68274998	92143062	125002	26938	2.65801	Inf	3	1
224637	206033	chr14	chr12	68400000	128010000	2253230000	2066210000	ENSG00000182185	ENSG00000181234	ENSG00000182185_ENSG00000181234	ENSG00000181234_ENSG00000182185	RAD51B	TMEM132C	68274998	128487659	125002	-477659	2.65801	Inf	3	1
224637	222525	chr14	chr14	68400000	47280000	2253230000	2232110000	ENSG00000182185	ENSG00000139915	ENSG00000182185_ENSG00000139915	ENSG00000139915_ENSG00000182185	RAD51B	MDGA2	68274998	47257848	125002	22152	2.65801	Inf	3	1
224637	224198	chr14	chr14	68400000	64010000	2253230000	2248840000	ENSG00000182185	ENSG00000054654	ENSG00000182185_ENSG00000054654	ENSG00000054654_ENSG00000182185	RAD51B	SYNE2	68274998	64039708	125002	-29708	2.65801	Inf	3	1
225025	9813	chr14	chr1	72280000	98620000	2257110000	98620000	ENSG00000182732	ENSG00000162627	ENSG00000182732_ENSG00000162627	ENSG00000162627_ENSG00000182732	RGS6	SNX7	72249480	98711100	30520	-91100	3.13513	Inf	4	3
225025	38953	chr14	chr2	72280000	142060000	2257110000	390510000	ENSG00000182732	ENSG00000168702	ENSG00000182732_ENSG00000168702	ENSG00000168702_ENSG00000182732	RGS6	LRP1B	72249480	141181562	30520	878438	3.13513	Inf	4	3
225025	56142	chr14	chr3	72280000	72750000	2257110000	562890000	ENSG00000182732	ENSG00000144736	ENSG00000182732_ENSG00000144736	ENSG00000144736_ENSG00000182732	RGS6	SHQ1	72249480	72805596	30520	-55596	3.13513	Inf	4	3
225025	131715	chr14	chr7	72280000	91610000	2257110000	1320580000	ENSG00000182732	ENSG00000127989	ENSG00000182732_ENSG00000127989	ENSG00000127989_ENSG00000182732	RGS6	MTERF1	72249480	91786364	30520	-176364	3.13513	Inf	4	3
225025	147652	chr14	chr8	72280000	92630000	2257110000	1480440000	ENSG00000182732	ENSG00000205133	ENSG00000182732_ENSG00000205133	ENSG00000205133_ENSG00000182732	RGS6	TRIQK	72249480	92950602	30520	-320602	3.13513	Inf	4	3
225025	148013	chr14	chr8	72280000	96240000	2257110000	1484050000	ENSG00000182732	ENSG00000156467	ENSG00000182732_ENSG00000156467	ENSG00000156467_ENSG00000182732	RGS6	UQCRB	72249480	96230777	30520	9223	3.13513	Inf	4	3
225025	148189	chr14	chr8	72280000	98000000	2257110000	1485810000	ENSG00000182732	ENSG00000156482	ENSG00000182732_ENSG00000156482	ENSG00000156482_ENSG00000182732	RGS6	RPL30	72249480	98035660	30520	-35660	3.13513	Inf	4	3
225025	148773	chr14	chr8	72280000	103840000	2257110000	1491650000	ENSG00000182732	ENSG00000176406	ENSG00000182732_ENSG00000176406	ENSG00000176406_ENSG00000182732	RGS6	RIMS2	72249480	103878395	30520	-38395	3.13513	Inf	4	3
225025	149388	chr14	chr8	72280000	109990000	2257110000	1497800000	ENSG00000182732	ENSG00000164794	ENSG00000182732_ENSG00000164794	ENSG00000164794_ENSG00000182732	RGS6	KCNV1	72249480	109969704	30520	20296	3.13513	Inf	4	3
225025	153672	chr14	chr9	72280000	8690000	2257110000	1541130000	ENSG00000182732	ENSG00000153707	ENSG00000182732_ENSG00000153707	ENSG00000153707_ENSG00000182732	RGS6	PTPRD	72249480	9463484	30520	-773484	3.13513	Inf	4	3
225025	154677	chr14	chr9	72280000	18740000	2257110000	1551180000	ENSG00000182732	ENSG00000155875	ENSG00000182732_ENSG00000155875	ENSG00000155875_ENSG00000182732	RGS6	SAXO1	72249480	18954132	30520	-214132	3.13513	Inf	4	3
225025	197923	chr14	chr12	72280000	46910000	2257110000	1985110000	ENSG00000182732	ENSG00000139209	ENSG00000182732_ENSG00000139209	ENSG00000139209_ENSG00000182732	RGS6	SLC38A4	72249480	46798584	30520	111416	3.13513	Inf	4	3
225660	4647	chr14	chr1	78630000	46960000	2263460000	46960000	ENSG00000021645	ENSG00000187048	ENSG00000021645_ENSG00000187048	ENSG00000187048_ENSG00000021645	NRXN3	CYP4A11	79019332	46935330	-389332	24670	2.65801	Inf	3	1
225660	16334	chr14	chr1	78630000	163830000	2263460000	163830000	ENSG00000021645	ENSG00000143228	ENSG00000021645_ENSG00000143228	ENSG00000143228_ENSG00000021645	NRXN3	NUF2	79019332	163311170	-389332	518830	2.65801	Inf	3	1
225660	16721	chr14	chr1	78630000	167700000	2263460000	167700000	ENSG00000021645	ENSG00000198771	ENSG00000021645_ENSG00000198771	ENSG00000198771_ENSG00000021645	NRXN3	RCSD1	79019332	167669394	-389332	30606	2.65801	Inf	3	1
225660	17056	chr14	chr1	78630000	171050000	2263460000	171050000	ENSG00000021645	ENSG00000117501	ENSG00000021645_ENSG00000117501	ENSG00000117501_ENSG00000021645	NRXN3	MROH9	79019332	171000118	-389332	49882	2.65801	Inf	3	1
225660	17058	chr14	chr1	78630000	171070000	2263460000	171070000	ENSG00000021645	ENSG00000007933	ENSG00000021645_ENSG00000007933	ENSG00000007933_ENSG00000021645	NRXN3	FMO3	79019332	171104360	-389332	-34360	2.65801	Inf	3	1
225660	21854	chr14	chr1	78630000	219030000	2263460000	219030000	ENSG00000021645	ENSG00000143353	ENSG00000021645_ENSG00000143353	ENSG00000143353_ENSG00000021645	NRXN3	LYPLAL1	79019332	219193367	-389332	-163367	2.65801	Inf	3	1
225660	25228	chr14	chr2	78630000	4810000	2263460000	253260000	ENSG00000021645	ENSG00000176887	ENSG00000021645_ENSG00000176887	ENSG00000176887_ENSG00000021645	NRXN3	SOX11	79019332	5696884	-389332	-886884	2.65801	Inf	3	1
225660	50034	chr14	chr3	78630000	11670000	2263460000	501810000	ENSG00000021645	ENSG00000144560	ENSG00000021645_ENSG00000144560	ENSG00000144560_ENSG00000021645	NRXN3	VGLL4	79019332	11663710	-389332	6290	2.65801	Inf	3	1
225660	50058	chr14	chr3	78630000	11910000	2263460000	502050000	ENSG00000021645	ENSG00000144559	ENSG00000021645_ENSG00000144559	ENSG00000144559_ENSG00000021645	NRXN3	TAMM41	79019332	11818680	-389332	91320	2.65801	Inf	3	1
225660	51748	chr14	chr3	78630000	28810000	2263460000	518950000	ENSG00000021645	ENSG00000283563	ENSG00000021645_ENSG00000283563	ENSG00000283563_ENSG00000021645	NRXN3	AC098650.1	79019332	29058358	-389332	-248358	2.65801	Inf	3	1
225660	52175	chr14	chr3	78630000	33080000	2263460000	523220000	ENSG00000021645	ENSG00000188167	ENSG00000021645_ENSG00000188167	ENSG00000188167_ENSG00000021645	NRXN3	TMPPE	79019332	33093784	-389332	-13784	2.65801	Inf	3	1
225660	63247	chr14	chr3	78630000	143800000	2263460000	633940000	ENSG00000021645	ENSG00000181744	ENSG00000021645_ENSG00000181744	ENSG00000181744_ENSG00000021645	NRXN3	DIPK2A	79019332	144010258	-389332	-210258	2.65801	Inf	3	1
225660	68051	chr14	chr3	78630000	191840000	2263460000	681980000	ENSG00000021645	ENSG00000253548	ENSG00000021645_ENSG00000253548	ENSG00000253548_ENSG00000021645	NRXN3	PYDC2	79019332	191461310	-389332	378690	2.65801	Inf	3	1
225660	71844	chr14	chr4	78630000	32470000	2263460000	720400000	ENSG00000021645	ENSG00000169851	ENSG00000021645_ENSG00000169851	ENSG00000169851_ENSG00000021645	NRXN3	PCDH7	79019332	30933610	-389332	1536390	2.65801	Inf	3	1
225660	86574	chr14	chr4	78630000	179770000	2263460000	867700000	ENSG00000021645	ENSG00000038002	ENSG00000021645_ENSG00000038002	ENSG00000038002_ENSG00000021645	NRXN3	AGA	79019332	177436606	-389332	2333394	2.65801	Inf	3	1
225660	89134	chr14	chr5	78630000	16150000	2263460000	893790000	ENSG00000021645	ENSG00000183654	ENSG00000021645_ENSG00000183654	ENSG00000183654_ENSG00000021645	NRXN3	2021-03-11	79019332	16123950	-389332	26050	2.65801	Inf	3	1
225660	89828	chr14	chr5	78630000	23090000	2263460000	900730000	ENSG00000021645	ENSG00000164256	ENSG00000021645_ENSG00000164256	ENSG00000164256_ENSG00000021645	NRXN3	PRDM9	79019332	23486092	-389332	-396092	2.65801	Inf	3	1
225660	101840	chr14	chr5	78630000	143210000	2263460000	1020850000	ENSG00000021645	ENSG00000113580	ENSG00000021645_ENSG00000113580	ENSG00000113580_ENSG00000021645	NRXN3	NR3C1	79019332	143356722	-389332	-146722	2.65801	Inf	3	1
225660	106738	chr14	chr6	78630000	11650000	2263460000	1070320000	ENSG00000021645	ENSG00000205269	ENSG00000021645_ENSG00000205269	ENSG00000205269_ENSG00000021645	NRXN3	TMEM170B	79019332	11560636	-389332	89364	2.65801	Inf	3	1
225660	106747	chr14	chr6	78630000	11740000	2263460000	1070410000	ENSG00000021645	ENSG00000111863	ENSG00000021645_ENSG00000111863	ENSG00000111863_ENSG00000021645	NRXN3	ADTRP	79019332	11759550	-389332	-19550	2.65801	Inf	3	1
225660	120362	chr14	chr6	78630000	147890000	2263460000	1206560000	ENSG00000021645	ENSG00000203727	ENSG00000021645_ENSG00000203727	ENSG00000203727_ENSG00000021645	NRXN3	SAMD5	79019332	147623118	-389332	266882	2.65801	Inf	3	1
225660	123939	chr14	chr7	78630000	13850000	2263460000	1242820000	ENSG00000021645	ENSG00000006468	ENSG00000021645_ENSG00000006468	ENSG00000006468_ENSG00000021645	NRXN3	ETV1	79019332	13941327	-389332	-91327	2.65801	Inf	3	1
225660	132908	chr14	chr7	78630000	103540000	2263460000	1332510000	ENSG00000021645	ENSG00000170615	ENSG00000021645_ENSG00000170615	ENSG00000170615_ENSG00000021645	NRXN3	SLC26A5	79019332	103399454	-389332	140546	2.65801	Inf	3	1
225660	133680	chr14	chr7	78630000	111260000	2263460000	1340230000	ENSG00000021645	ENSG00000184903	ENSG00000021645_ENSG00000184903	ENSG00000184903_ENSG00000021645	NRXN3	IMMP2L	79019332	111112784	-389332	147216	2.65801	Inf	3	1
225660	134494	chr14	chr7	78630000	119400000	2263460000	1348370000	ENSG00000021645	ENSG00000106013	ENSG00000021645_ENSG00000106013	ENSG00000106013_ENSG00000021645	NRXN3	ANKRD7	79019332	118355420	-389332	1044580	2.65801	Inf	3	1
225660	134851	chr14	chr7	78630000	122970000	2263460000	1351940000	ENSG00000021645	ENSG00000128519	ENSG00000021645_ENSG00000128519	ENSG00000128519_ENSG00000021645	NRXN3	TAS2R16	79019332	122995202	-389332	-25202	2.65801	Inf	3	1
225660	137147	chr14	chr7	78630000	145930000	2263460000	1374900000	ENSG00000021645	ENSG00000196511	ENSG00000021645_ENSG00000196511	ENSG00000196511_ENSG00000021645	NRXN3	TPK1	79019332	144644168	-389332	1285832	2.65801	Inf	3	1
225660	139179	chr14	chr8	78630000	7900000	2263460000	1395710000	ENSG00000021645	ENSG00000171711	ENSG00000021645_ENSG00000171711	ENSG00000171711_ENSG00000021645	NRXN3	DEFB4A	79019332	7895670	-389332	4330	2.65801	Inf	3	1
225660	147985	chr14	chr8	78630000	95960000	2263460000	1483770000	ENSG00000021645	ENSG00000156466	ENSG00000021645_ENSG00000156466	ENSG00000156466_ENSG00000021645	NRXN3	GDF6	79019332	96151570	-389332	-191570	2.65801	Inf	3	1
225660	152113	chr14	chr8	78630000	137240000	2263460000	1525050000	ENSG00000021645	ENSG00000147724	ENSG00000021645_ENSG00000147724	ENSG00000147724_ENSG00000021645	NRXN3	FAM135B	79019332	138313642	-389332	-1073642	2.65801	Inf	3	1
225660	160196	chr14	chr9	78630000	73930000	2263460000	1606370000	ENSG00000021645	ENSG00000198963	ENSG00000021645_ENSG00000198963	ENSG00000198963_ENSG00000021645	NRXN3	RORB	79019332	74595256	-389332	-665256	2.65801	Inf	3	1
225660	160498	chr14	chr9	78630000	76950000	2263460000	1609390000	ENSG00000021645	ENSG00000204612	ENSG00000021645_ENSG00000204612	ENSG00000204612_ENSG00000021645	NRXN3	FOXB2	79019332	77020304	-389332	-70304	2.65801	Inf	3	1
225660	161805	chr14	chr9	78630000	90020000	2263460000	1622460000	ENSG00000021645	ENSG00000130222	ENSG00000021645_ENSG00000130222	ENSG00000130222_ENSG00000021645	NRXN3	GADD45G	79019332	89605784	-389332	414216	2.65801	Inf	3	1
225660	162022	chr14	chr9	78630000	92190000	2263460000	1624630000	ENSG00000021645	ENSG00000196305	ENSG00000021645_ENSG00000196305	ENSG00000196305_ENSG00000021645	NRXN3	IARS	79019332	92251982	-389332	-61982	2.65801	Inf	3	1
225660	164860	chr14	chr9	78630000	120570000	2263460000	1653010000	ENSG00000021645	ENSG00000136861	ENSG00000021645_ENSG00000136861	ENSG00000136861_ENSG00000021645	NRXN3	CDK5RAP2	79019332	120484520	-389332	85480	2.65801	Inf	3	1
225660	173040	chr14	chr10	78630000	64970000	2263460000	1735300000	ENSG00000021645	ENSG00000165476	ENSG00000021645_ENSG00000165476	ENSG00000165476_ENSG00000021645	NRXN3	REEP3	79019332	63573264	-389332	1396736	2.65801	Inf	3	1
225660	173126	chr14	chr10	78630000	65830000	2263460000	1736160000	ENSG00000021645	ENSG00000183230	ENSG00000021645_ENSG00000183230	ENSG00000183230_ENSG00000021645	NRXN3	CTNNA3	79019332	66804359	-389332	-974359	2.65801	Inf	3	1
225660	177483	chr14	chr10	78630000	109400000	2263460000	1779730000	ENSG00000021645	ENSG00000108039	ENSG00000021645_ENSG00000108039	ENSG00000108039_ENSG00000021645	NRXN3	XPNPEP1	79019332	109894160	-389332	-494160	2.65801	Inf	3	1
225660	177643	chr14	chr10	78630000	111000000	2263460000	1781330000	ENSG00000021645	ENSG00000108061	ENSG00000021645_ENSG00000108061	ENSG00000108061_ENSG00000021645	NRXN3	SHOC2	79019332	110966607	-389332	33393	2.65801	Inf	3	1
225660	181225	chr14	chr11	78630000	14020000	2263460000	1817640000	ENSG00000021645	ENSG00000262655	ENSG00000021645_ENSG00000262655	ENSG00000262655_ENSG00000021645	NRXN3	SPON1	79019332	14115428	-389332	-95428	2.65801	Inf	3	1
225660	186701	chr14	chr11	78630000	68780000	2263460000	1872400000	ENSG00000021645	ENSG00000110090	ENSG00000021645_ENSG00000110090	ENSG00000110090_ENSG00000021645	NRXN3	CPT1A	79019332	68799515	-389332	-19515	2.65801	Inf	3	1
225660	189229	chr14	chr11	78630000	94060000	2263460000	1897680000	ENSG00000021645	ENSG00000181333	ENSG00000021645_ENSG00000181333	ENSG00000181333_ENSG00000021645	NRXN3	HEPHL1	79019332	94067556	-389332	-7556	2.65801	Inf	3	1
225660	189642	chr14	chr11	78630000	98190000	2263460000	1901810000	ENSG00000021645	ENSG00000149972	ENSG00000021645_ENSG00000149972	ENSG00000149972_ENSG00000021645	NRXN3	CNTN5	79019332	99689917	-389332	-1499917	2.65801	Inf	3	1
225660	202449	chr14	chr12	78630000	92170000	2263460000	2030370000	ENSG00000021645	ENSG00000133639	ENSG00000021645_ENSG00000133639	ENSG00000133639_ENSG00000021645	NRXN3	BTG1	79019332	92143062	-389332	26938	2.65801	Inf	3	1
225660	206033	chr14	chr12	78630000	128010000	2263460000	2066210000	ENSG00000021645	ENSG00000181234	ENSG00000021645_ENSG00000181234	ENSG00000181234_ENSG00000021645	NRXN3	TMEM132C	79019332	128487659	-389332	-477659	2.65801	Inf	3	1
225660	222525	chr14	chr14	78630000	47280000	2263460000	2232110000	ENSG00000021645	ENSG00000139915	ENSG00000021645_ENSG00000139915	ENSG00000139915_ENSG00000021645	NRXN3	MDGA2	79019332	47257848	-389332	22152	2.65801	Inf	3	1
225660	224198	chr14	chr14	78630000	64010000	2263460000	2248840000	ENSG00000021645	ENSG00000054654	ENSG00000021645_ENSG00000054654	ENSG00000054654_ENSG00000021645	NRXN3	SYNE2	79019332	64039708	-389332	-29708	2.65801	Inf	3	1
225660	224637	chr14	chr14	78630000	68400000	2263460000	2253230000	ENSG00000021645	ENSG00000182185	ENSG00000021645_ENSG00000182185	ENSG00000182185_ENSG00000021645	NRXN3	RAD51B	79019332	68274998	-389332	125002	2.65801	Inf	3	1
226177	28201	chr14	chr2	83800000	34540000	2268630000	282990000	ENSG00000185070	ENSG00000119812	ENSG00000185070_ENSG00000119812	ENSG00000119812_ENSG00000185070	FLRT2	FAM98A	85592286	33591521	-1792286	948479	2.02119	Inf	2	5
226177	30442	chr14	chr2	83800000	56950000	2268630000	305400000	ENSG00000185070	ENSG00000055813	ENSG00000185070_ENSG00000055813	ENSG00000055813_ENSG00000185070	FLRT2	CCDC85A	85592286	56285081	-1792286	664919	2.02119	Inf	2	5
226177	48694	chr14	chr2	83800000	239470000	2268630000	487920000	ENSG00000185070	ENSG00000068024	ENSG00000185070_ENSG00000068024	ENSG00000068024_ENSG00000185070	FLRT2	HDAC4	85592286	239224911	-1792286	245089	2.02119	Inf	2	5
226177	48711	chr14	chr2	83800000	239640000	2268630000	488090000	ENSG00000185070	ENSG00000130414	ENSG00000185070_ENSG00000130414	ENSG00000130414_ENSG00000185070	FLRT2	NDUFA10	85592286	239958898	-1792286	-318898	2.02119	Inf	2	5
226177	99357	chr14	chr5	83800000	118380000	2268630000	996020000	ENSG00000185070	ENSG00000169570	ENSG00000185070_ENSG00000169570	ENSG00000169570_ENSG00000185070	FLRT2	DTWD2	85592286	118912310	-1792286	-532310	2.02119	Inf	2	5
226177	135101	chr14	chr7	83800000	125470000	2268630000	1354440000	ENSG00000185070	ENSG00000128513	ENSG00000185070_ENSG00000128513	ENSG00000128513_ENSG00000185070	FLRT2	POT1	85592286	124876184	-1792286	593816	2.02119	Inf	2	5
226177	152347	chr14	chr8	83800000	139580000	2268630000	1527390000	ENSG00000185070	ENSG00000169427	ENSG00000185070_ENSG00000169427	ENSG00000169427_ENSG00000185070	FLRT2	KCNK9	85592286	139652474	-1792286	-72474	2.02119	Inf	2	5
226177	153385	chr14	chr9	83800000	5820000	2268630000	1538260000	ENSG00000185070	ENSG00000099219	ENSG00000185070_ENSG00000099219	ENSG00000099219_ENSG00000185070	FLRT2	ERMP1	85592286	5799096	-1792286	20904	2.02119	Inf	2	5
226177	153951	chr14	chr9	83800000	11480000	2268630000	1543920000	ENSG00000185070	ENSG00000107165	ENSG00000185070_ENSG00000107165	ENSG00000107165_ENSG00000185070	FLRT2	TYRP1	85592286	12697864	-1792286	-1217864	2.02119	Inf	2	5
226177	197319	chr14	chr12	83800000	40870000	2268630000	1979070000	ENSG00000185070	ENSG00000018236	ENSG00000185070_ENSG00000018236	ENSG00000018236_ENSG00000185070	FLRT2	CNTN1	85592286	40882427	-1792286	-12427	2.02119	Inf	2	5
226177	216450	chr14	chr13	83800000	99900000	2268630000	2170870000	ENSG00000185070	ENSG00000139800	ENSG00000185070_ENSG00000139800	ENSG00000139800_ENSG00000185070	FLRT2	ZIC5	85592286	99967436	-1792286	-67436	2.02119	Inf	2	5
226177	221893	chr14	chr14	83800000	40960000	2268630000	2225790000	ENSG00000185070	ENSG00000165379	ENSG00000185070_ENSG00000165379	ENSG00000165379_ENSG00000185070	FLRT2	LRFN5	85592286	41756060	-1792286	-796060	2.02119	Inf	2	5
226537	135503	chr14	chr7	87400000	129490000	2272230000	1358460000	ENSG00000054983	ENSG00000240204	ENSG00000054983_ENSG00000240204	ENSG00000240204_ENSG00000054983	GALC	SMKR1	87915742	129507724	-515742	-17724	3.13513	Inf	4	0
227689	4647	chr14	chr1	98920000	46960000	2283750000	46960000	ENSG00000176605	ENSG00000187048	ENSG00000176605_ENSG00000187048	ENSG00000187048_ENSG00000176605	C14orf177	CYP4A11	98714690	46935330	205310	24670	2.65801	Inf	3	1
227689	16334	chr14	chr1	98920000	163830000	2283750000	163830000	ENSG00000176605	ENSG00000143228	ENSG00000176605_ENSG00000143228	ENSG00000143228_ENSG00000176605	C14orf177	NUF2	98714690	163311170	205310	518830	2.65801	Inf	3	1
227689	16721	chr14	chr1	98920000	167700000	2283750000	167700000	ENSG00000176605	ENSG00000198771	ENSG00000176605_ENSG00000198771	ENSG00000198771_ENSG00000176605	C14orf177	RCSD1	98714690	167669394	205310	30606	2.65801	Inf	3	1
227689	17056	chr14	chr1	98920000	171050000	2283750000	171050000	ENSG00000176605	ENSG00000117501	ENSG00000176605_ENSG00000117501	ENSG00000117501_ENSG00000176605	C14orf177	MROH9	98714690	171000118	205310	49882	2.65801	Inf	3	1
227689	17058	chr14	chr1	98920000	171070000	2283750000	171070000	ENSG00000176605	ENSG00000007933	ENSG00000176605_ENSG00000007933	ENSG00000007933_ENSG00000176605	C14orf177	FMO3	98714690	171104360	205310	-34360	2.65801	Inf	3	1
227689	21854	chr14	chr1	98920000	219030000	2283750000	219030000	ENSG00000176605	ENSG00000143353	ENSG00000176605_ENSG00000143353	ENSG00000143353_ENSG00000176605	C14orf177	LYPLAL1	98714690	219193367	205310	-163367	2.65801	Inf	3	1
227689	25228	chr14	chr2	98920000	4810000	2283750000	253260000	ENSG00000176605	ENSG00000176887	ENSG00000176605_ENSG00000176887	ENSG00000176887_ENSG00000176605	C14orf177	SOX11	98714690	5696884	205310	-886884	2.65801	Inf	3	1
227689	50034	chr14	chr3	98920000	11670000	2283750000	501810000	ENSG00000176605	ENSG00000144560	ENSG00000176605_ENSG00000144560	ENSG00000144560_ENSG00000176605	C14orf177	VGLL4	98714690	11663710	205310	6290	2.65801	Inf	3	1
227689	50058	chr14	chr3	98920000	11910000	2283750000	502050000	ENSG00000176605	ENSG00000144559	ENSG00000176605_ENSG00000144559	ENSG00000144559_ENSG00000176605	C14orf177	TAMM41	98714690	11818680	205310	91320	2.65801	Inf	3	1
227689	51748	chr14	chr3	98920000	28810000	2283750000	518950000	ENSG00000176605	ENSG00000283563	ENSG00000176605_ENSG00000283563	ENSG00000283563_ENSG00000176605	C14orf177	AC098650.1	98714690	29058358	205310	-248358	2.65801	Inf	3	1
227689	52175	chr14	chr3	98920000	33080000	2283750000	523220000	ENSG00000176605	ENSG00000188167	ENSG00000176605_ENSG00000188167	ENSG00000188167_ENSG00000176605	C14orf177	TMPPE	98714690	33093784	205310	-13784	2.65801	Inf	3	1
227689	63247	chr14	chr3	98920000	143800000	2283750000	633940000	ENSG00000176605	ENSG00000181744	ENSG00000176605_ENSG00000181744	ENSG00000181744_ENSG00000176605	C14orf177	DIPK2A	98714690	144010258	205310	-210258	2.65801	Inf	3	1
227689	68051	chr14	chr3	98920000	191840000	2283750000	681980000	ENSG00000176605	ENSG00000253548	ENSG00000176605_ENSG00000253548	ENSG00000253548_ENSG00000176605	C14orf177	PYDC2	98714690	191461310	205310	378690	2.65801	Inf	3	1
227689	71844	chr14	chr4	98920000	32470000	2283750000	720400000	ENSG00000176605	ENSG00000169851	ENSG00000176605_ENSG00000169851	ENSG00000169851_ENSG00000176605	C14orf177	PCDH7	98714690	30933610	205310	1536390	2.65801	Inf	3	1
227689	86574	chr14	chr4	98920000	179770000	2283750000	867700000	ENSG00000176605	ENSG00000038002	ENSG00000176605_ENSG00000038002	ENSG00000038002_ENSG00000176605	C14orf177	AGA	98714690	177436606	205310	2333394	2.65801	Inf	3	1
227689	89134	chr14	chr5	98920000	16150000	2283750000	893790000	ENSG00000176605	ENSG00000183654	ENSG00000176605_ENSG00000183654	ENSG00000183654_ENSG00000176605	C14orf177	2021-03-11	98714690	16123950	205310	26050	2.65801	Inf	3	1
227689	89828	chr14	chr5	98920000	23090000	2283750000	900730000	ENSG00000176605	ENSG00000164256	ENSG00000176605_ENSG00000164256	ENSG00000164256_ENSG00000176605	C14orf177	PRDM9	98714690	23486092	205310	-396092	2.65801	Inf	3	1
227689	101840	chr14	chr5	98920000	143210000	2283750000	1020850000	ENSG00000176605	ENSG00000113580	ENSG00000176605_ENSG00000113580	ENSG00000113580_ENSG00000176605	C14orf177	NR3C1	98714690	143356722	205310	-146722	2.65801	Inf	3	1
227689	106738	chr14	chr6	98920000	11650000	2283750000	1070320000	ENSG00000176605	ENSG00000205269	ENSG00000176605_ENSG00000205269	ENSG00000205269_ENSG00000176605	C14orf177	TMEM170B	98714690	11560636	205310	89364	2.65801	Inf	3	1
227689	106747	chr14	chr6	98920000	11740000	2283750000	1070410000	ENSG00000176605	ENSG00000111863	ENSG00000176605_ENSG00000111863	ENSG00000111863_ENSG00000176605	C14orf177	ADTRP	98714690	11759550	205310	-19550	2.65801	Inf	3	1
227689	120362	chr14	chr6	98920000	147890000	2283750000	1206560000	ENSG00000176605	ENSG00000203727	ENSG00000176605_ENSG00000203727	ENSG00000203727_ENSG00000176605	C14orf177	SAMD5	98714690	147623118	205310	266882	2.65801	Inf	3	1
227689	123939	chr14	chr7	98920000	13850000	2283750000	1242820000	ENSG00000176605	ENSG00000006468	ENSG00000176605_ENSG00000006468	ENSG00000006468_ENSG00000176605	C14orf177	ETV1	98714690	13941327	205310	-91327	2.65801	Inf	3	1
227689	132908	chr14	chr7	98920000	103540000	2283750000	1332510000	ENSG00000176605	ENSG00000170615	ENSG00000176605_ENSG00000170615	ENSG00000170615_ENSG00000176605	C14orf177	SLC26A5	98714690	103399454	205310	140546	2.65801	Inf	3	1
227689	133680	chr14	chr7	98920000	111260000	2283750000	1340230000	ENSG00000176605	ENSG00000184903	ENSG00000176605_ENSG00000184903	ENSG00000184903_ENSG00000176605	C14orf177	IMMP2L	98714690	111112784	205310	147216	2.65801	Inf	3	1
227689	134494	chr14	chr7	98920000	119400000	2283750000	1348370000	ENSG00000176605	ENSG00000106013	ENSG00000176605_ENSG00000106013	ENSG00000106013_ENSG00000176605	C14orf177	ANKRD7	98714690	118355420	205310	1044580	2.65801	Inf	3	1
227689	134851	chr14	chr7	98920000	122970000	2283750000	1351940000	ENSG00000176605	ENSG00000128519	ENSG00000176605_ENSG00000128519	ENSG00000128519_ENSG00000176605	C14orf177	TAS2R16	98714690	122995202	205310	-25202	2.65801	Inf	3	1
227689	137147	chr14	chr7	98920000	145930000	2283750000	1374900000	ENSG00000176605	ENSG00000196511	ENSG00000176605_ENSG00000196511	ENSG00000196511_ENSG00000176605	C14orf177	TPK1	98714690	144644168	205310	1285832	2.65801	Inf	3	1
227689	139179	chr14	chr8	98920000	7900000	2283750000	1395710000	ENSG00000176605	ENSG00000171711	ENSG00000176605_ENSG00000171711	ENSG00000171711_ENSG00000176605	C14orf177	DEFB4A	98714690	7895670	205310	4330	2.65801	Inf	3	1
227689	147985	chr14	chr8	98920000	95960000	2283750000	1483770000	ENSG00000176605	ENSG00000156466	ENSG00000176605_ENSG00000156466	ENSG00000156466_ENSG00000176605	C14orf177	GDF6	98714690	96151570	205310	-191570	2.65801	Inf	3	1
227689	152113	chr14	chr8	98920000	137240000	2283750000	1525050000	ENSG00000176605	ENSG00000147724	ENSG00000176605_ENSG00000147724	ENSG00000147724_ENSG00000176605	C14orf177	FAM135B	98714690	138313642	205310	-1073642	2.65801	Inf	3	1
227689	160196	chr14	chr9	98920000	73930000	2283750000	1606370000	ENSG00000176605	ENSG00000198963	ENSG00000176605_ENSG00000198963	ENSG00000198963_ENSG00000176605	C14orf177	RORB	98714690	74595256	205310	-665256	2.65801	Inf	3	1
227689	160498	chr14	chr9	98920000	76950000	2283750000	1609390000	ENSG00000176605	ENSG00000204612	ENSG00000176605_ENSG00000204612	ENSG00000204612_ENSG00000176605	C14orf177	FOXB2	98714690	77020304	205310	-70304	2.65801	Inf	3	1
227689	161805	chr14	chr9	98920000	90020000	2283750000	1622460000	ENSG00000176605	ENSG00000130222	ENSG00000176605_ENSG00000130222	ENSG00000130222_ENSG00000176605	C14orf177	GADD45G	98714690	89605784	205310	414216	2.65801	Inf	3	1
227689	162022	chr14	chr9	98920000	92190000	2283750000	1624630000	ENSG00000176605	ENSG00000196305	ENSG00000176605_ENSG00000196305	ENSG00000196305_ENSG00000176605	C14orf177	IARS	98714690	92251982	205310	-61982	2.65801	Inf	3	1
227689	164860	chr14	chr9	98920000	120570000	2283750000	1653010000	ENSG00000176605	ENSG00000136861	ENSG00000176605_ENSG00000136861	ENSG00000136861_ENSG00000176605	C14orf177	CDK5RAP2	98714690	120484520	205310	85480	2.65801	Inf	3	1
227689	173040	chr14	chr10	98920000	64970000	2283750000	1735300000	ENSG00000176605	ENSG00000165476	ENSG00000176605_ENSG00000165476	ENSG00000165476_ENSG00000176605	C14orf177	REEP3	98714690	63573264	205310	1396736	2.65801	Inf	3	1
227689	173126	chr14	chr10	98920000	65830000	2283750000	1736160000	ENSG00000176605	ENSG00000183230	ENSG00000176605_ENSG00000183230	ENSG00000183230_ENSG00000176605	C14orf177	CTNNA3	98714690	66804359	205310	-974359	2.65801	Inf	3	1
227689	177483	chr14	chr10	98920000	109400000	2283750000	1779730000	ENSG00000176605	ENSG00000108039	ENSG00000176605_ENSG00000108039	ENSG00000108039_ENSG00000176605	C14orf177	XPNPEP1	98714690	109894160	205310	-494160	2.65801	Inf	3	1
227689	177643	chr14	chr10	98920000	111000000	2283750000	1781330000	ENSG00000176605	ENSG00000108061	ENSG00000176605_ENSG00000108061	ENSG00000108061_ENSG00000176605	C14orf177	SHOC2	98714690	110966607	205310	33393	2.65801	Inf	3	1
227689	181225	chr14	chr11	98920000	14020000	2283750000	1817640000	ENSG00000176605	ENSG00000262655	ENSG00000176605_ENSG00000262655	ENSG00000262655_ENSG00000176605	C14orf177	SPON1	98714690	14115428	205310	-95428	2.65801	Inf	3	1
227689	186701	chr14	chr11	98920000	68780000	2283750000	1872400000	ENSG00000176605	ENSG00000110090	ENSG00000176605_ENSG00000110090	ENSG00000110090_ENSG00000176605	C14orf177	CPT1A	98714690	68799515	205310	-19515	2.65801	Inf	3	1
227689	189229	chr14	chr11	98920000	94060000	2283750000	1897680000	ENSG00000176605	ENSG00000181333	ENSG00000176605_ENSG00000181333	ENSG00000181333_ENSG00000176605	C14orf177	HEPHL1	98714690	94067556	205310	-7556	2.65801	Inf	3	1
227689	189642	chr14	chr11	98920000	98190000	2283750000	1901810000	ENSG00000176605	ENSG00000149972	ENSG00000176605_ENSG00000149972	ENSG00000149972_ENSG00000176605	C14orf177	CNTN5	98714690	99689917	205310	-1499917	2.65801	Inf	3	1
227689	202449	chr14	chr12	98920000	92170000	2283750000	2030370000	ENSG00000176605	ENSG00000133639	ENSG00000176605_ENSG00000133639	ENSG00000133639_ENSG00000176605	C14orf177	BTG1	98714690	92143062	205310	26938	2.65801	Inf	3	1
227689	206033	chr14	chr12	98920000	128010000	2283750000	2066210000	ENSG00000176605	ENSG00000181234	ENSG00000176605_ENSG00000181234	ENSG00000181234_ENSG00000176605	C14orf177	TMEM132C	98714690	128487659	205310	-477659	2.65801	Inf	3	1
227689	222525	chr14	chr14	98920000	47280000	2283750000	2232110000	ENSG00000176605	ENSG00000139915	ENSG00000176605_ENSG00000139915	ENSG00000139915_ENSG00000176605	C14orf177	MDGA2	98714690	47257848	205310	22152	2.65801	Inf	3	1
227689	224198	chr14	chr14	98920000	64010000	2283750000	2248840000	ENSG00000176605	ENSG00000054654	ENSG00000176605_ENSG00000054654	ENSG00000054654_ENSG00000176605	C14orf177	SYNE2	98714690	64039708	205310	-29708	2.65801	Inf	3	1
227689	224637	chr14	chr14	98920000	68400000	2283750000	2253230000	ENSG00000176605	ENSG00000182185	ENSG00000176605_ENSG00000182185	ENSG00000182185_ENSG00000176605	C14orf177	RAD51B	98714690	68274998	205310	125002	2.65801	Inf	3	1
227689	225660	chr14	chr14	98920000	78630000	2283750000	2263460000	ENSG00000176605	ENSG00000021645	ENSG00000176605_ENSG00000021645	ENSG00000021645_ENSG00000176605	C14orf177	NRXN3	98714690	79019332	205310	-389332	2.65801	Inf	3	1
228069	2962	chr14	chr1	102720000	30110000	2287550000	30110000	ENSG00000089902	ENSG00000162510	ENSG00000089902_ENSG00000162510	ENSG00000162510_ENSG00000089902	RCOR1	MATN1	102661605	30717431	58395	-607431	3.13513	Inf	4	2
228069	4506	chr14	chr1	102720000	45550000	2287550000	45550000	ENSG00000089902	ENSG00000117448	ENSG00000089902_ENSG00000117448	ENSG00000117448_ENSG00000089902	RCOR1	AKR1A1	102661605	45560296	58395	-10296	3.13513	Inf	4	2
228069	5484	chr14	chr1	102720000	55330000	2287550000	55330000	ENSG00000089902	ENSG00000162402	ENSG00000089902_ENSG00000162402	ENSG00000162402_ENSG00000089902	RCOR1	USP24	102661605	55140862	58395	189138	3.13513	Inf	4	2
228069	15328	chr14	chr1	102720000	153770000	2287550000	153770000	ENSG00000089902	ENSG00000143554	ENSG00000089902_ENSG00000143554	ENSG00000143554_ENSG00000089902	RCOR1	SLC27A3	102661605	153777256	58395	-7256	3.13513	Inf	4	2
228069	34736	chr14	chr2	102720000	99890000	2287550000	348340000	ENSG00000089902	ENSG00000144218	ENSG00000089902_ENSG00000144218	ENSG00000144218_ENSG00000089902	RCOR1	AFF3	102661605	99844079	58395	45921	3.13513	Inf	4	2
228069	35141	chr14	chr2	102720000	103940000	2287550000	352390000	ENSG00000089902	ENSG00000198914	ENSG00000089902_ENSG00000198914	ENSG00000198914_ENSG00000089902	RCOR1	POU3F3	102661605	104857042	58395	-917042	3.13513	Inf	4	2
228069	39264	chr14	chr2	102720000	145170000	2287550000	393620000	ENSG00000089902	ENSG00000169554	ENSG00000089902_ENSG00000169554	ENSG00000169554_ENSG00000089902	RCOR1	ZEB2	102661605	144442710	58395	727290	3.13513	Inf	4	2
228069	71577	chr14	chr4	102720000	29800000	2287550000	717730000	ENSG00000089902	ENSG00000169851	ENSG00000089902_ENSG00000169851	ENSG00000169851_ENSG00000089902	RCOR1	PCDH7	102661605	30933610	58395	-1133610	3.13513	Inf	4	0
228069	78926	chr14	chr4	102720000	103290000	2287550000	791220000	ENSG00000089902	ENSG00000138778	ENSG00000089902_ENSG00000138778	ENSG00000138778_ENSG00000089902	RCOR1	CENPE	102661605	103152108	58395	137892	3.13513	Inf	4	2
228069	86737	chr14	chr4	102720000	181400000	2287550000	869330000	ENSG00000089902	ENSG00000218336	ENSG00000089902_ENSG00000218336	ENSG00000218336_ENSG00000089902	RCOR1	TENM3	102661605	182473506	58395	-1073506	3.13513	Inf	4	2
228069	121945	chr14	chr6	102720000	163720000	2287550000	1222390000	ENSG00000089902	ENSG00000112531	ENSG00000089902_ENSG00000112531	ENSG00000112531_ENSG00000089902	RCOR1	QKI	102661605	163496296	58395	223704	3.13513	Inf	4	2
228069	134157	chr14	chr7	102720000	116030000	2287550000	1345000000	ENSG00000089902	ENSG00000105967	ENSG00000089902_ENSG00000105967	ENSG00000105967_ENSG00000089902	RCOR1	TFEC	102661605	116047522	58395	-17522	3.13513	Inf	4	2
228069	138438	chr14	chr7	102720000	158840000	2287550000	1387810000	ENSG00000089902	ENSG00000117868	ENSG00000089902_ENSG00000117868	ENSG00000117868_ENSG00000089902	RCOR1	ESYT2	102661605	158780624	58395	59376	3.13513	Inf	4	2
228069	149179	chr14	chr8	102720000	107900000	2287550000	1495710000	ENSG00000089902	ENSG00000147655	ENSG00000089902_ENSG00000147655	ENSG00000147655_ENSG00000089902	RCOR1	RSPO2	102661605	107991479	58395	-91479	3.13513	Inf	4	2
228069	154400	chr14	chr9	102720000	15970000	2287550000	1548410000	ENSG00000089902	ENSG00000164989	ENSG00000089902_ENSG00000164989	ENSG00000164989_ENSG00000089902	RCOR1	CCDC171	102661605	15807353	58395	162647	3.13513	Inf	4	2
228069	193106	chr14	chr11	102720000	132830000	2287550000	1936450000	ENSG00000089902	ENSG00000183715	ENSG00000089902_ENSG00000183715	ENSG00000183715_ENSG00000089902	RCOR1	OPCML	102661605	132973748	58395	-143748	3.13513	Inf	4	2
228069	206388	chr14	chr12	102720000	131560000	2287550000	2069760000	ENSG00000089902	ENSG00000061936	ENSG00000089902_ENSG00000061936	ENSG00000061936_ENSG00000089902	RCOR1	SFSWAP	102661605	131755409	58395	-195409	3.13513	Inf	4	2
228103	2962	chr14	chr1	103060000	30110000	2287890000	30110000	ENSG00000283071	ENSG00000162510	ENSG00000283071_ENSG00000162510	ENSG00000162510_ENSG00000283071	LBHD2	MATN1	103087118	30717431	-27118	-607431	3.13513	Inf	4	2
228103	4506	chr14	chr1	103060000	45550000	2287890000	45550000	ENSG00000283071	ENSG00000117448	ENSG00000283071_ENSG00000117448	ENSG00000117448_ENSG00000283071	LBHD2	AKR1A1	103087118	45560296	-27118	-10296	3.13513	Inf	4	2
228103	5484	chr14	chr1	103060000	55330000	2287890000	55330000	ENSG00000283071	ENSG00000162402	ENSG00000283071_ENSG00000162402	ENSG00000162402_ENSG00000283071	LBHD2	USP24	103087118	55140862	-27118	189138	3.13513	Inf	4	2
228103	15328	chr14	chr1	103060000	153770000	2287890000	153770000	ENSG00000283071	ENSG00000143554	ENSG00000283071_ENSG00000143554	ENSG00000143554_ENSG00000283071	LBHD2	SLC27A3	103087118	153777256	-27118	-7256	3.13513	Inf	4	2
228103	34736	chr14	chr2	103060000	99890000	2287890000	348340000	ENSG00000283071	ENSG00000144218	ENSG00000283071_ENSG00000144218	ENSG00000144218_ENSG00000283071	LBHD2	AFF3	103087118	99844079	-27118	45921	3.13513	Inf	4	2
228103	35141	chr14	chr2	103060000	103940000	2287890000	352390000	ENSG00000283071	ENSG00000198914	ENSG00000283071_ENSG00000198914	ENSG00000198914_ENSG00000283071	LBHD2	POU3F3	103087118	104857042	-27118	-917042	3.13513	Inf	4	2
228103	39264	chr14	chr2	103060000	145170000	2287890000	393620000	ENSG00000283071	ENSG00000169554	ENSG00000283071_ENSG00000169554	ENSG00000169554_ENSG00000283071	LBHD2	ZEB2	103087118	144442710	-27118	727290	3.13513	Inf	4	2
228103	71577	chr14	chr4	103060000	29800000	2287890000	717730000	ENSG00000283071	ENSG00000169851	ENSG00000283071_ENSG00000169851	ENSG00000169851_ENSG00000283071	LBHD2	PCDH7	103087118	30933610	-27118	-1133610	3.13513	Inf	4	0
228103	78926	chr14	chr4	103060000	103290000	2287890000	791220000	ENSG00000283071	ENSG00000138778	ENSG00000283071_ENSG00000138778	ENSG00000138778_ENSG00000283071	LBHD2	CENPE	103087118	103152108	-27118	137892	3.13513	Inf	4	2
228103	86737	chr14	chr4	103060000	181400000	2287890000	869330000	ENSG00000283071	ENSG00000218336	ENSG00000283071_ENSG00000218336	ENSG00000218336_ENSG00000283071	LBHD2	TENM3	103087118	182473506	-27118	-1073506	3.13513	Inf	4	2
228103	121945	chr14	chr6	103060000	163720000	2287890000	1222390000	ENSG00000283071	ENSG00000112531	ENSG00000283071_ENSG00000112531	ENSG00000112531_ENSG00000283071	LBHD2	QKI	103087118	163496296	-27118	223704	3.13513	Inf	4	2
228103	134157	chr14	chr7	103060000	116030000	2287890000	1345000000	ENSG00000283071	ENSG00000105967	ENSG00000283071_ENSG00000105967	ENSG00000105967_ENSG00000283071	LBHD2	TFEC	103087118	116047522	-27118	-17522	3.13513	Inf	4	2
228103	138438	chr14	chr7	103060000	158840000	2287890000	1387810000	ENSG00000283071	ENSG00000117868	ENSG00000283071_ENSG00000117868	ENSG00000117868_ENSG00000283071	LBHD2	ESYT2	103087118	158780624	-27118	59376	3.13513	Inf	4	2
228103	149179	chr14	chr8	103060000	107900000	2287890000	1495710000	ENSG00000283071	ENSG00000147655	ENSG00000283071_ENSG00000147655	ENSG00000147655_ENSG00000283071	LBHD2	RSPO2	103087118	107991479	-27118	-91479	3.13513	Inf	4	2
228103	154400	chr14	chr9	103060000	15970000	2287890000	1548410000	ENSG00000283071	ENSG00000164989	ENSG00000283071_ENSG00000164989	ENSG00000164989_ENSG00000283071	LBHD2	CCDC171	103087118	15807353	-27118	162647	3.13513	Inf	4	2
228103	193106	chr14	chr11	103060000	132830000	2287890000	1936450000	ENSG00000283071	ENSG00000183715	ENSG00000283071_ENSG00000183715	ENSG00000183715_ENSG00000283071	LBHD2	OPCML	103087118	132973748	-27118	-143748	3.13513	Inf	4	2
228103	206388	chr14	chr12	103060000	131560000	2287890000	2069760000	ENSG00000283071	ENSG00000061936	ENSG00000283071_ENSG00000061936	ENSG00000061936_ENSG00000283071	LBHD2	SFSWAP	103087118	131755409	-27118	-195409	3.13513	Inf	4	2
228125	2962	chr14	chr1	103280000	30110000	2288110000	30110000	ENSG00000100664	ENSG00000162510	ENSG00000100664_ENSG00000162510	ENSG00000162510_ENSG00000100664	EIF5	MATN1	103339284	30717431	-59284	-607431	3.13513	Inf	4	2
228125	4506	chr14	chr1	103280000	45550000	2288110000	45550000	ENSG00000100664	ENSG00000117448	ENSG00000100664_ENSG00000117448	ENSG00000117448_ENSG00000100664	EIF5	AKR1A1	103339284	45560296	-59284	-10296	3.13513	Inf	4	2
228125	5484	chr14	chr1	103280000	55330000	2288110000	55330000	ENSG00000100664	ENSG00000162402	ENSG00000100664_ENSG00000162402	ENSG00000162402_ENSG00000100664	EIF5	USP24	103339284	55140862	-59284	189138	3.13513	Inf	4	2
228125	15328	chr14	chr1	103280000	153770000	2288110000	153770000	ENSG00000100664	ENSG00000143554	ENSG00000100664_ENSG00000143554	ENSG00000143554_ENSG00000100664	EIF5	SLC27A3	103339284	153777256	-59284	-7256	3.13513	Inf	4	2
228125	34736	chr14	chr2	103280000	99890000	2288110000	348340000	ENSG00000100664	ENSG00000144218	ENSG00000100664_ENSG00000144218	ENSG00000144218_ENSG00000100664	EIF5	AFF3	103339284	99844079	-59284	45921	3.13513	Inf	4	2
228125	35141	chr14	chr2	103280000	103940000	2288110000	352390000	ENSG00000100664	ENSG00000198914	ENSG00000100664_ENSG00000198914	ENSG00000198914_ENSG00000100664	EIF5	POU3F3	103339284	104857042	-59284	-917042	3.13513	Inf	4	2
228125	39264	chr14	chr2	103280000	145170000	2288110000	393620000	ENSG00000100664	ENSG00000169554	ENSG00000100664_ENSG00000169554	ENSG00000169554_ENSG00000100664	EIF5	ZEB2	103339284	144442710	-59284	727290	3.13513	Inf	4	2
228125	71577	chr14	chr4	103280000	29800000	2288110000	717730000	ENSG00000100664	ENSG00000169851	ENSG00000100664_ENSG00000169851	ENSG00000169851_ENSG00000100664	EIF5	PCDH7	103339284	30933610	-59284	-1133610	3.13513	Inf	4	0
228125	78926	chr14	chr4	103280000	103290000	2288110000	791220000	ENSG00000100664	ENSG00000138778	ENSG00000100664_ENSG00000138778	ENSG00000138778_ENSG00000100664	EIF5	CENPE	103339284	103152108	-59284	137892	3.13513	Inf	4	2
228125	86737	chr14	chr4	103280000	181400000	2288110000	869330000	ENSG00000100664	ENSG00000218336	ENSG00000100664_ENSG00000218336	ENSG00000218336_ENSG00000100664	EIF5	TENM3	103339284	182473506	-59284	-1073506	3.13513	Inf	4	2
228125	121945	chr14	chr6	103280000	163720000	2288110000	1222390000	ENSG00000100664	ENSG00000112531	ENSG00000100664_ENSG00000112531	ENSG00000112531_ENSG00000100664	EIF5	QKI	103339284	163496296	-59284	223704	3.13513	Inf	4	2
228125	134157	chr14	chr7	103280000	116030000	2288110000	1345000000	ENSG00000100664	ENSG00000105967	ENSG00000100664_ENSG00000105967	ENSG00000105967_ENSG00000100664	EIF5	TFEC	103339284	116047522	-59284	-17522	3.13513	Inf	4	2
228125	138438	chr14	chr7	103280000	158840000	2288110000	1387810000	ENSG00000100664	ENSG00000117868	ENSG00000100664_ENSG00000117868	ENSG00000117868_ENSG00000100664	EIF5	ESYT2	103339284	158780624	-59284	59376	3.13513	Inf	4	2
228125	149179	chr14	chr8	103280000	107900000	2288110000	1495710000	ENSG00000100664	ENSG00000147655	ENSG00000100664_ENSG00000147655	ENSG00000147655_ENSG00000100664	EIF5	RSPO2	103339284	107991479	-59284	-91479	3.13513	Inf	4	2
228125	154400	chr14	chr9	103280000	15970000	2288110000	1548410000	ENSG00000100664	ENSG00000164989	ENSG00000100664_ENSG00000164989	ENSG00000164989_ENSG00000100664	EIF5	CCDC171	103339284	15807353	-59284	162647	3.13513	Inf	4	2
228125	193106	chr14	chr11	103280000	132830000	2288110000	1936450000	ENSG00000100664	ENSG00000183715	ENSG00000100664_ENSG00000183715	ENSG00000183715_ENSG00000100664	EIF5	OPCML	103339284	132973748	-59284	-143748	3.13513	Inf	4	2
228125	206388	chr14	chr12	103280000	131560000	2288110000	2069760000	ENSG00000100664	ENSG00000061936	ENSG00000100664_ENSG00000061936	ENSG00000061936_ENSG00000100664	EIF5	SFSWAP	103339284	131755409	-59284	-195409	3.13513	Inf	4	2
230462	5475	chr15	chr1	20600000	55240000	2311970000	55240000	ENSG00000277322	ENSG00000162402	ENSG00000277322_ENSG00000162402	ENSG00000162402_ENSG00000277322	GOLGA6L6	USP24	20536828	55140862	63172	99138	3.47756	Inf	5	0
230462	21260	chr15	chr1	20600000	213090000	2311970000	213090000	ENSG00000277322	ENSG00000136643	ENSG00000277322_ENSG00000136643	ENSG00000136643_ENSG00000277322	GOLGA6L6	RPS6KC1	20536828	213163004	63172	-73004	3.47756	Inf	5	0
230462	81177	chr15	chr4	20600000	125800000	2311970000	813730000	ENSG00000277322	ENSG00000196159	ENSG00000277322_ENSG00000196159	ENSG00000196159_ENSG00000277322	GOLGA6L6	FAT4	20536828	125404666	63172	395334	3.47756	Inf	5	0
230462	90043	chr15	chr5	20600000	25240000	2311970000	902880000	ENSG00000277322	ENSG00000040731	ENSG00000277322_ENSG00000040731	ENSG00000040731_ENSG00000277322	GOLGA6L6	CDH10	20536828	24566039	63172	673961	3.47756	Inf	5	0
230462	133076	chr15	chr7	20600000	105220000	2311970000	1334190000	ENSG00000277322	ENSG00000135250	ENSG00000277322_ENSG00000135250	ENSG00000135250_ENSG00000277322	GOLGA6L6	SRPK2	20536828	105255006	63172	-35006	3.47756	Inf	5	0
230462	143719	chr15	chr8	20600000	53300000	2311970000	1441110000	ENSG00000277322	ENSG00000082556	ENSG00000277322_ENSG00000082556	ENSG00000082556_ENSG00000277322	GOLGA6L6	OPRK1	20536828	53238706	63172	61294	3.47756	Inf	5	0
230462	147666	chr15	chr8	20600000	92770000	2311970000	1480580000	ENSG00000277322	ENSG00000205133	ENSG00000277322_ENSG00000205133	ENSG00000205133_ENSG00000277322	GOLGA6L6	TRIQK	20536828	92950602	63172	-180602	3.47756	Inf	5	0
232032	96896	chr15	chr5	36300000	93770000	2327670000	971410000	ENSG00000186073	ENSG00000248483	ENSG00000186073_ENSG00000248483	ENSG00000248483_ENSG00000186073	C15orf41	POU5F2	36694937	93737428	-394937	32572	3.6994	Inf	6	0
233228	2962	chr15	chr1	48260000	30110000	2339630000	30110000	ENSG00000074803	ENSG00000162510	ENSG00000074803_ENSG00000162510	ENSG00000162510_ENSG00000074803	SLC12A1	MATN1	48241258	30717431	18742	-607431	3.13513	Inf	4	2
233228	4506	chr15	chr1	48260000	45550000	2339630000	45550000	ENSG00000074803	ENSG00000117448	ENSG00000074803_ENSG00000117448	ENSG00000117448_ENSG00000074803	SLC12A1	AKR1A1	48241258	45560296	18742	-10296	3.13513	Inf	4	2
233228	5484	chr15	chr1	48260000	55330000	2339630000	55330000	ENSG00000074803	ENSG00000162402	ENSG00000074803_ENSG00000162402	ENSG00000162402_ENSG00000074803	SLC12A1	USP24	48241258	55140862	18742	189138	3.13513	Inf	4	2
233228	15328	chr15	chr1	48260000	153770000	2339630000	153770000	ENSG00000074803	ENSG00000143554	ENSG00000074803_ENSG00000143554	ENSG00000143554_ENSG00000074803	SLC12A1	SLC27A3	48241258	153777256	18742	-7256	3.13513	Inf	4	2
233228	34736	chr15	chr2	48260000	99890000	2339630000	348340000	ENSG00000074803	ENSG00000144218	ENSG00000074803_ENSG00000144218	ENSG00000144218_ENSG00000074803	SLC12A1	AFF3	48241258	99844079	18742	45921	3.13513	Inf	4	2
233228	35141	chr15	chr2	48260000	103940000	2339630000	352390000	ENSG00000074803	ENSG00000198914	ENSG00000074803_ENSG00000198914	ENSG00000198914_ENSG00000074803	SLC12A1	POU3F3	48241258	104857042	18742	-917042	3.13513	Inf	4	2
233228	39264	chr15	chr2	48260000	145170000	2339630000	393620000	ENSG00000074803	ENSG00000169554	ENSG00000074803_ENSG00000169554	ENSG00000169554_ENSG00000074803	SLC12A1	ZEB2	48241258	144442710	18742	727290	3.13513	Inf	4	2
233228	71577	chr15	chr4	48260000	29800000	2339630000	717730000	ENSG00000074803	ENSG00000169851	ENSG00000074803_ENSG00000169851	ENSG00000169851_ENSG00000074803	SLC12A1	PCDH7	48241258	30933610	18742	-1133610	3.13513	Inf	4	0
233228	78926	chr15	chr4	48260000	103290000	2339630000	791220000	ENSG00000074803	ENSG00000138778	ENSG00000074803_ENSG00000138778	ENSG00000138778_ENSG00000074803	SLC12A1	CENPE	48241258	103152108	18742	137892	3.13513	Inf	4	2
233228	86737	chr15	chr4	48260000	181400000	2339630000	869330000	ENSG00000074803	ENSG00000218336	ENSG00000074803_ENSG00000218336	ENSG00000218336_ENSG00000074803	SLC12A1	TENM3	48241258	182473506	18742	-1073506	3.13513	Inf	4	2
233228	121945	chr15	chr6	48260000	163720000	2339630000	1222390000	ENSG00000074803	ENSG00000112531	ENSG00000074803_ENSG00000112531	ENSG00000112531_ENSG00000074803	SLC12A1	QKI	48241258	163496296	18742	223704	3.13513	Inf	4	2
233228	134157	chr15	chr7	48260000	116030000	2339630000	1345000000	ENSG00000074803	ENSG00000105967	ENSG00000074803_ENSG00000105967	ENSG00000105967_ENSG00000074803	SLC12A1	TFEC	48241258	116047522	18742	-17522	3.13513	Inf	4	2
233228	138438	chr15	chr7	48260000	158840000	2339630000	1387810000	ENSG00000074803	ENSG00000117868	ENSG00000074803_ENSG00000117868	ENSG00000117868_ENSG00000074803	SLC12A1	ESYT2	48241258	158780624	18742	59376	3.13513	Inf	4	2
233228	149179	chr15	chr8	48260000	107900000	2339630000	1495710000	ENSG00000074803	ENSG00000147655	ENSG00000074803_ENSG00000147655	ENSG00000147655_ENSG00000074803	SLC12A1	RSPO2	48241258	107991479	18742	-91479	3.13513	Inf	4	2
233228	154400	chr15	chr9	48260000	15970000	2339630000	1548410000	ENSG00000074803	ENSG00000164989	ENSG00000074803_ENSG00000164989	ENSG00000164989_ENSG00000074803	SLC12A1	CCDC171	48241258	15807353	18742	162647	3.13513	Inf	4	2
233228	193106	chr15	chr11	48260000	132830000	2339630000	1936450000	ENSG00000074803	ENSG00000183715	ENSG00000074803_ENSG00000183715	ENSG00000183715_ENSG00000074803	SLC12A1	OPCML	48241258	132973748	18742	-143748	3.13513	Inf	4	2
233228	206388	chr15	chr12	48260000	131560000	2339630000	2069760000	ENSG00000074803	ENSG00000061936	ENSG00000074803_ENSG00000061936	ENSG00000061936_ENSG00000074803	SLC12A1	SFSWAP	48241258	131755409	18742	-195409	3.13513	Inf	4	2
233228	228069	chr15	chr14	48260000	102720000	2339630000	2287550000	ENSG00000074803	ENSG00000089902	ENSG00000074803_ENSG00000089902	ENSG00000089902_ENSG00000074803	SLC12A1	RCOR1	48241258	102661605	18742	58395	3.13513	Inf	4	2
233228	228103	chr15	chr14	48260000	103060000	2339630000	2287890000	ENSG00000074803	ENSG00000283071	ENSG00000074803_ENSG00000283071	ENSG00000283071_ENSG00000074803	SLC12A1	LBHD2	48241258	103087118	18742	-27118	3.13513	Inf	4	2
233228	228125	chr15	chr14	48260000	103280000	2339630000	2288110000	ENSG00000074803	ENSG00000100664	ENSG00000074803_ENSG00000100664	ENSG00000100664_ENSG00000074803	SLC12A1	EIF5	48241258	103339284	18742	-59284	3.13513	Inf	4	2
233629	2962	chr15	chr1	52270000	30110000	2343640000	30110000	ENSG00000128833	ENSG00000162510	ENSG00000128833_ENSG00000162510	ENSG00000162510_ENSG00000128833	MYO5C	MATN1	52244063	30717431	25937	-607431	3.13513	Inf	4	2
233629	4506	chr15	chr1	52270000	45550000	2343640000	45550000	ENSG00000128833	ENSG00000117448	ENSG00000128833_ENSG00000117448	ENSG00000117448_ENSG00000128833	MYO5C	AKR1A1	52244063	45560296	25937	-10296	3.13513	Inf	4	2
233629	5484	chr15	chr1	52270000	55330000	2343640000	55330000	ENSG00000128833	ENSG00000162402	ENSG00000128833_ENSG00000162402	ENSG00000162402_ENSG00000128833	MYO5C	USP24	52244063	55140862	25937	189138	3.13513	Inf	4	2
233629	15328	chr15	chr1	52270000	153770000	2343640000	153770000	ENSG00000128833	ENSG00000143554	ENSG00000128833_ENSG00000143554	ENSG00000143554_ENSG00000128833	MYO5C	SLC27A3	52244063	153777256	25937	-7256	3.13513	Inf	4	2
233629	34736	chr15	chr2	52270000	99890000	2343640000	348340000	ENSG00000128833	ENSG00000144218	ENSG00000128833_ENSG00000144218	ENSG00000144218_ENSG00000128833	MYO5C	AFF3	52244063	99844079	25937	45921	3.13513	Inf	4	2
233629	35141	chr15	chr2	52270000	103940000	2343640000	352390000	ENSG00000128833	ENSG00000198914	ENSG00000128833_ENSG00000198914	ENSG00000198914_ENSG00000128833	MYO5C	POU3F3	52244063	104857042	25937	-917042	3.13513	Inf	4	2
233629	39264	chr15	chr2	52270000	145170000	2343640000	393620000	ENSG00000128833	ENSG00000169554	ENSG00000128833_ENSG00000169554	ENSG00000169554_ENSG00000128833	MYO5C	ZEB2	52244063	144442710	25937	727290	3.13513	Inf	4	2
233629	71577	chr15	chr4	52270000	29800000	2343640000	717730000	ENSG00000128833	ENSG00000169851	ENSG00000128833_ENSG00000169851	ENSG00000169851_ENSG00000128833	MYO5C	PCDH7	52244063	30933610	25937	-1133610	3.13513	Inf	4	0
233629	78926	chr15	chr4	52270000	103290000	2343640000	791220000	ENSG00000128833	ENSG00000138778	ENSG00000128833_ENSG00000138778	ENSG00000138778_ENSG00000128833	MYO5C	CENPE	52244063	103152108	25937	137892	3.13513	Inf	4	2
233629	86737	chr15	chr4	52270000	181400000	2343640000	869330000	ENSG00000128833	ENSG00000218336	ENSG00000128833_ENSG00000218336	ENSG00000218336_ENSG00000128833	MYO5C	TENM3	52244063	182473506	25937	-1073506	3.13513	Inf	4	2
233629	121945	chr15	chr6	52270000	163720000	2343640000	1222390000	ENSG00000128833	ENSG00000112531	ENSG00000128833_ENSG00000112531	ENSG00000112531_ENSG00000128833	MYO5C	QKI	52244063	163496296	25937	223704	3.13513	Inf	4	2
233629	134157	chr15	chr7	52270000	116030000	2343640000	1345000000	ENSG00000128833	ENSG00000105967	ENSG00000128833_ENSG00000105967	ENSG00000105967_ENSG00000128833	MYO5C	TFEC	52244063	116047522	25937	-17522	3.13513	Inf	4	2
233629	138438	chr15	chr7	52270000	158840000	2343640000	1387810000	ENSG00000128833	ENSG00000117868	ENSG00000128833_ENSG00000117868	ENSG00000117868_ENSG00000128833	MYO5C	ESYT2	52244063	158780624	25937	59376	3.13513	Inf	4	2
233629	149179	chr15	chr8	52270000	107900000	2343640000	1495710000	ENSG00000128833	ENSG00000147655	ENSG00000128833_ENSG00000147655	ENSG00000147655_ENSG00000128833	MYO5C	RSPO2	52244063	107991479	25937	-91479	3.13513	Inf	4	2
233629	154400	chr15	chr9	52270000	15970000	2343640000	1548410000	ENSG00000128833	ENSG00000164989	ENSG00000128833_ENSG00000164989	ENSG00000164989_ENSG00000128833	MYO5C	CCDC171	52244063	15807353	25937	162647	3.13513	Inf	4	2
233629	193106	chr15	chr11	52270000	132830000	2343640000	1936450000	ENSG00000128833	ENSG00000183715	ENSG00000128833_ENSG00000183715	ENSG00000183715_ENSG00000128833	MYO5C	OPCML	52244063	132973748	25937	-143748	3.13513	Inf	4	2
233629	206388	chr15	chr12	52270000	131560000	2343640000	2069760000	ENSG00000128833	ENSG00000061936	ENSG00000128833_ENSG00000061936	ENSG00000061936_ENSG00000128833	MYO5C	SFSWAP	52244063	131755409	25937	-195409	3.13513	Inf	4	2
233629	228069	chr15	chr14	52270000	102720000	2343640000	2287550000	ENSG00000128833	ENSG00000089902	ENSG00000128833_ENSG00000089902	ENSG00000089902_ENSG00000128833	MYO5C	RCOR1	52244063	102661605	25937	58395	3.13513	Inf	4	2
233629	228103	chr15	chr14	52270000	103060000	2343640000	2287890000	ENSG00000128833	ENSG00000283071	ENSG00000128833_ENSG00000283071	ENSG00000283071_ENSG00000128833	MYO5C	LBHD2	52244063	103087118	25937	-27118	3.13513	Inf	4	2
[truncated: 575 more rows]
